# Supplementary material for: Mobiluncus mulieris Alters the Transcriptomic Profile of Cervicovaginal Epithelial Cells, Shedding Light on Molecular Drivers of Adverse Reproductive Outcomes
Source: Research Square preprint supplement (doi:10.21203/rs.3.rs-6270025/v1), 2025-03-24
Supplement: Supplementary file 1 [file 619aa4a7040d3a515c3de88e.pdf]

# ***Mobiluncus mulieris* Alters the Transcriptomic Profile of Cervicovaginal Epithelial Cells, Shedding Light on Molecular Drivers of Adverse Reproductive Outcomes**

Yu Hasegawa<sup>1</sup>, Olivia Swain<sup>1</sup>, Urvija Rajpal<sup>2</sup>, Michael France<sup>3</sup>, Liqhwa Ncube<sup>1</sup>, Haocheng Yu<sup>4,5,6</sup>, Ilaria Mogno<sup>2,4</sup>, Amir Horowitz<sup>4,5,6</sup>, Jacques Ravel<sup>3</sup>, Michal A. Elovitz<sup>1,7,8</sup>

<sup>1</sup> Women's Biomedical Research Institute, Icahn School of Medicine at Mount Sinai, New York, New York

<sup>2</sup> Department of Immunology and Immunotherapy, Icahn School of Medicine at Mount Sinai, New York, New York

<sup>3</sup> Center for Advanced Microbiome Research and Innovation (CAMRI), Institute for Genome Sciences, and Department of Microbiology and Immunology, University of Maryland School of Medicine, Baltimore, Maryland

<sup>4</sup> Department of Genetics and Genomics Sciences, Icahn School of Medicine at Mount Sinai, New York, New York

<sup>5</sup> The Lipschultz Precision Immunology Institute, Icahn School of Medicine at Mount Sinai, New York, New York

<sup>6</sup> Department of Oncological Sciences, Tisch Cancer Institute, Icahn School of Medicine at Mount Sinai, New York, New York

<sup>7</sup> Department of Obstetrics, Gynecology and Reproductive Sciences, Icahn School of Medicine at Mount Sinai, New York, New York

<sup>8</sup> Nuttall Women's Health, New York, New York

## Supplementary Figures

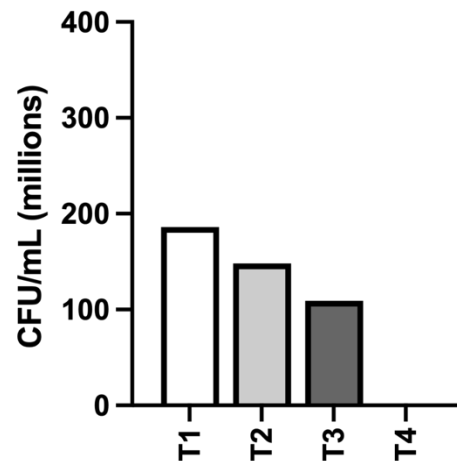

**Supplementary Figure 1.** The viability of the live *M. mulieris* culture was tracked from the sample preparation steps to 24 hours after incubation in a CO<sub>2</sub> incubator (the same conditions used during bacterial exposure). Colony-forming unit (CFU) counts of the same bacterial culture were monitored at four different time points: before (T1) and after (T2) centrifuging the *M. mulieris* culture at 3,500 g for 30 minutes to prepare the live bacterial pellet; after resuspending the bacterial pellet in KSF media (the same conditions used to prepare the live bacterial sample for exposure to cervicovaginal epithelial cells, T3); and 24 hours after incubation in a CO<sub>2</sub> incubator (T4).

Supplementary Information

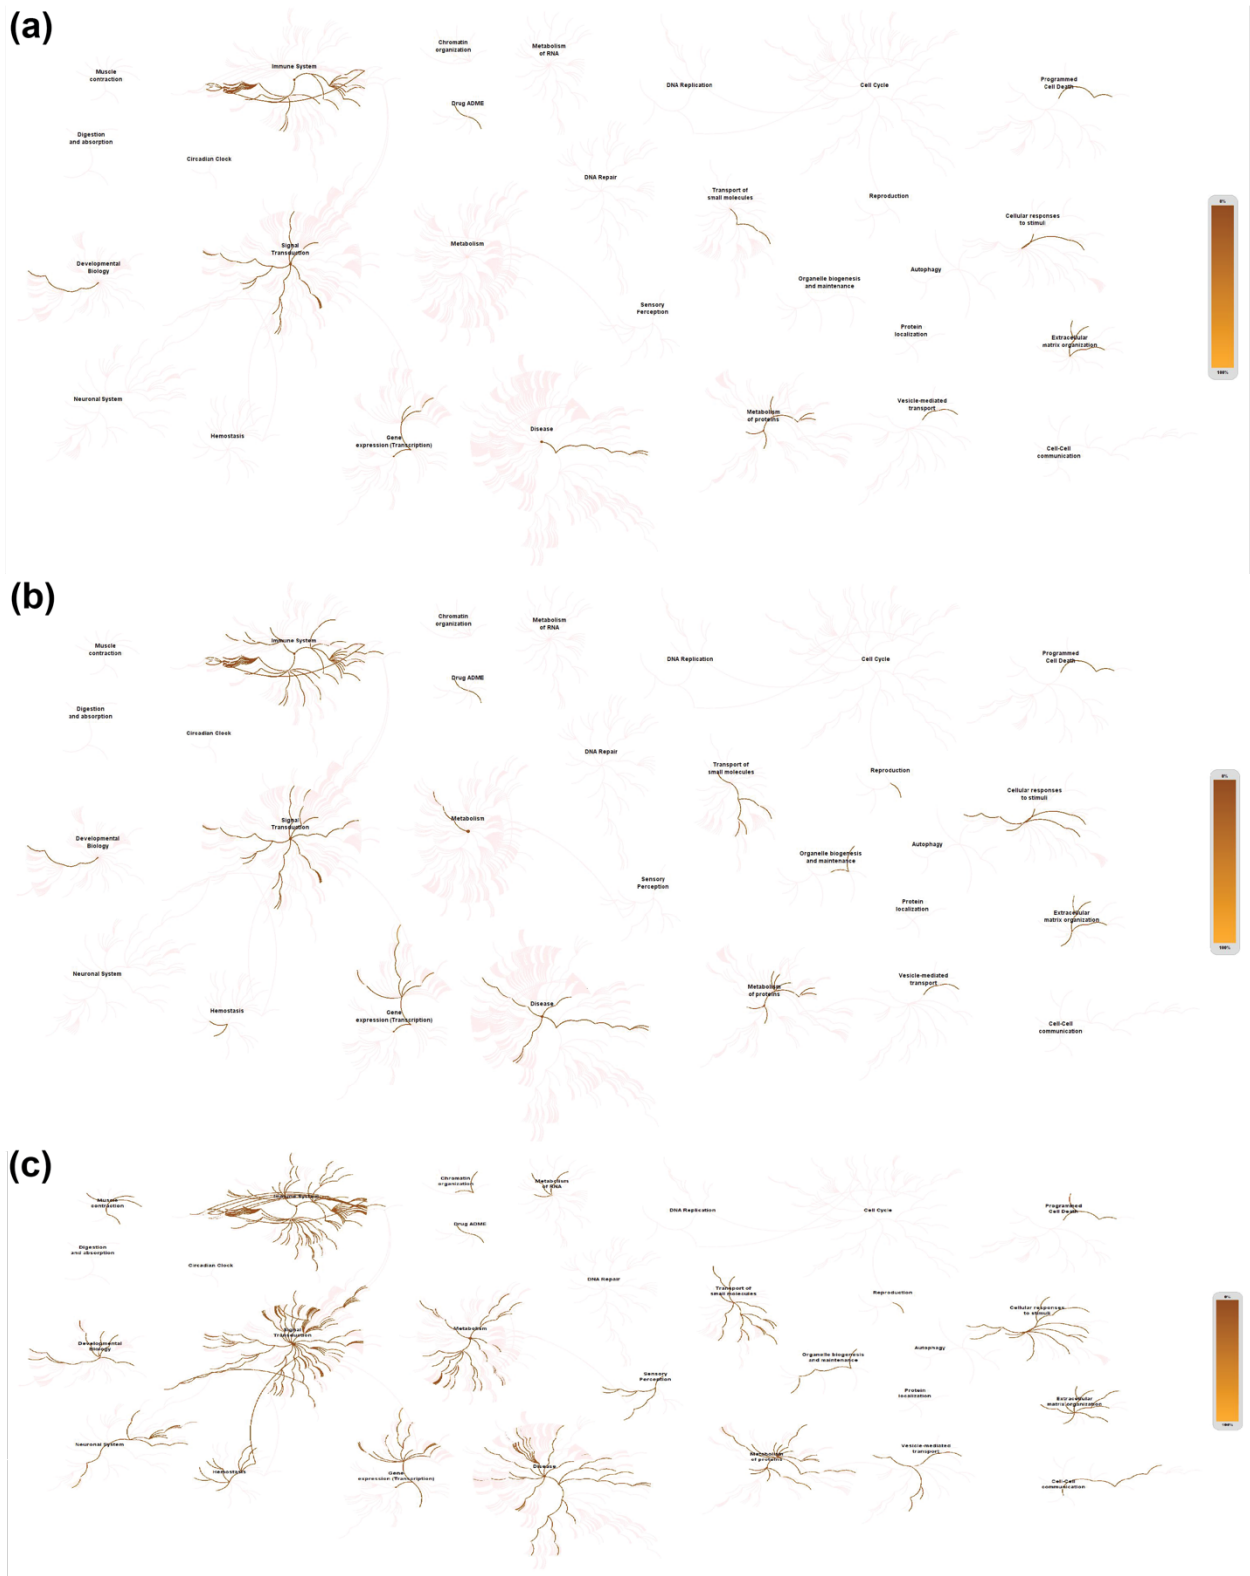

Supplementary Information

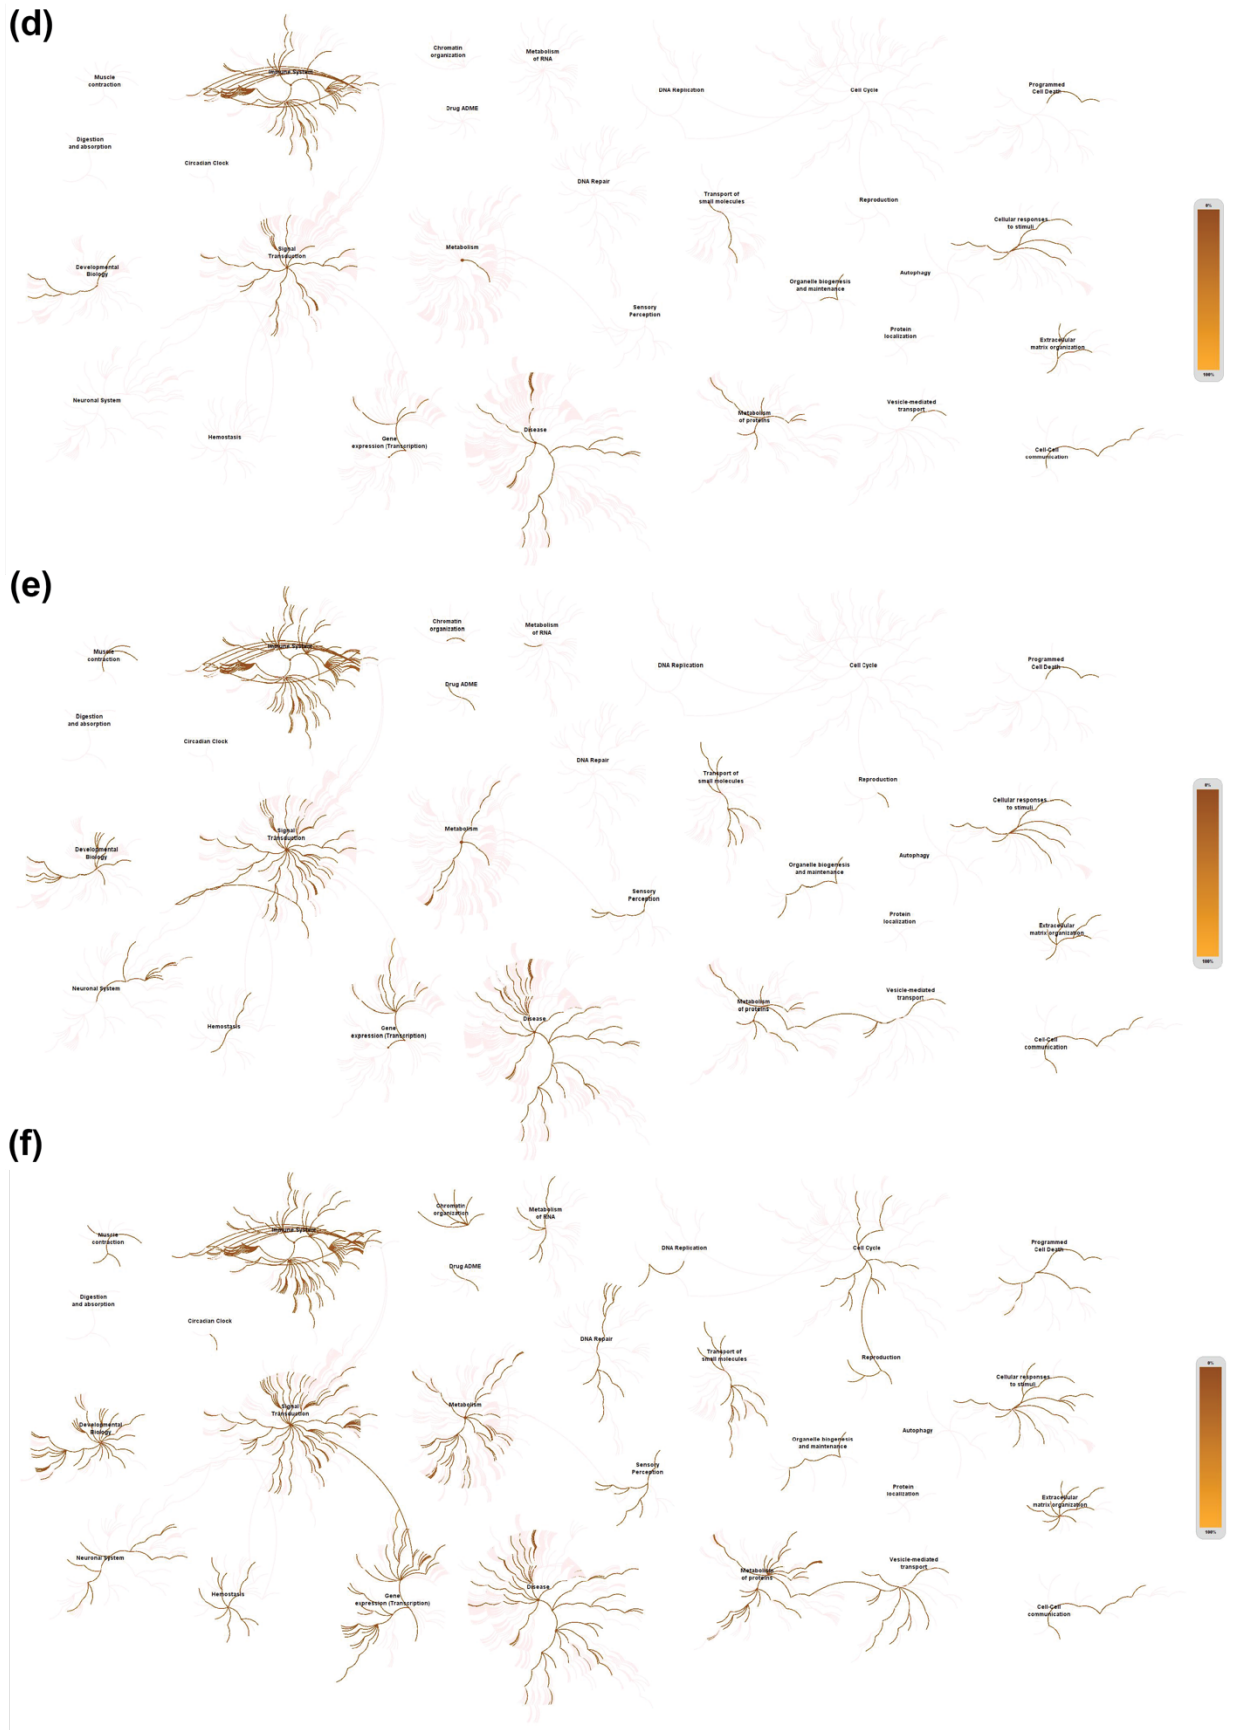

Supplementary Information

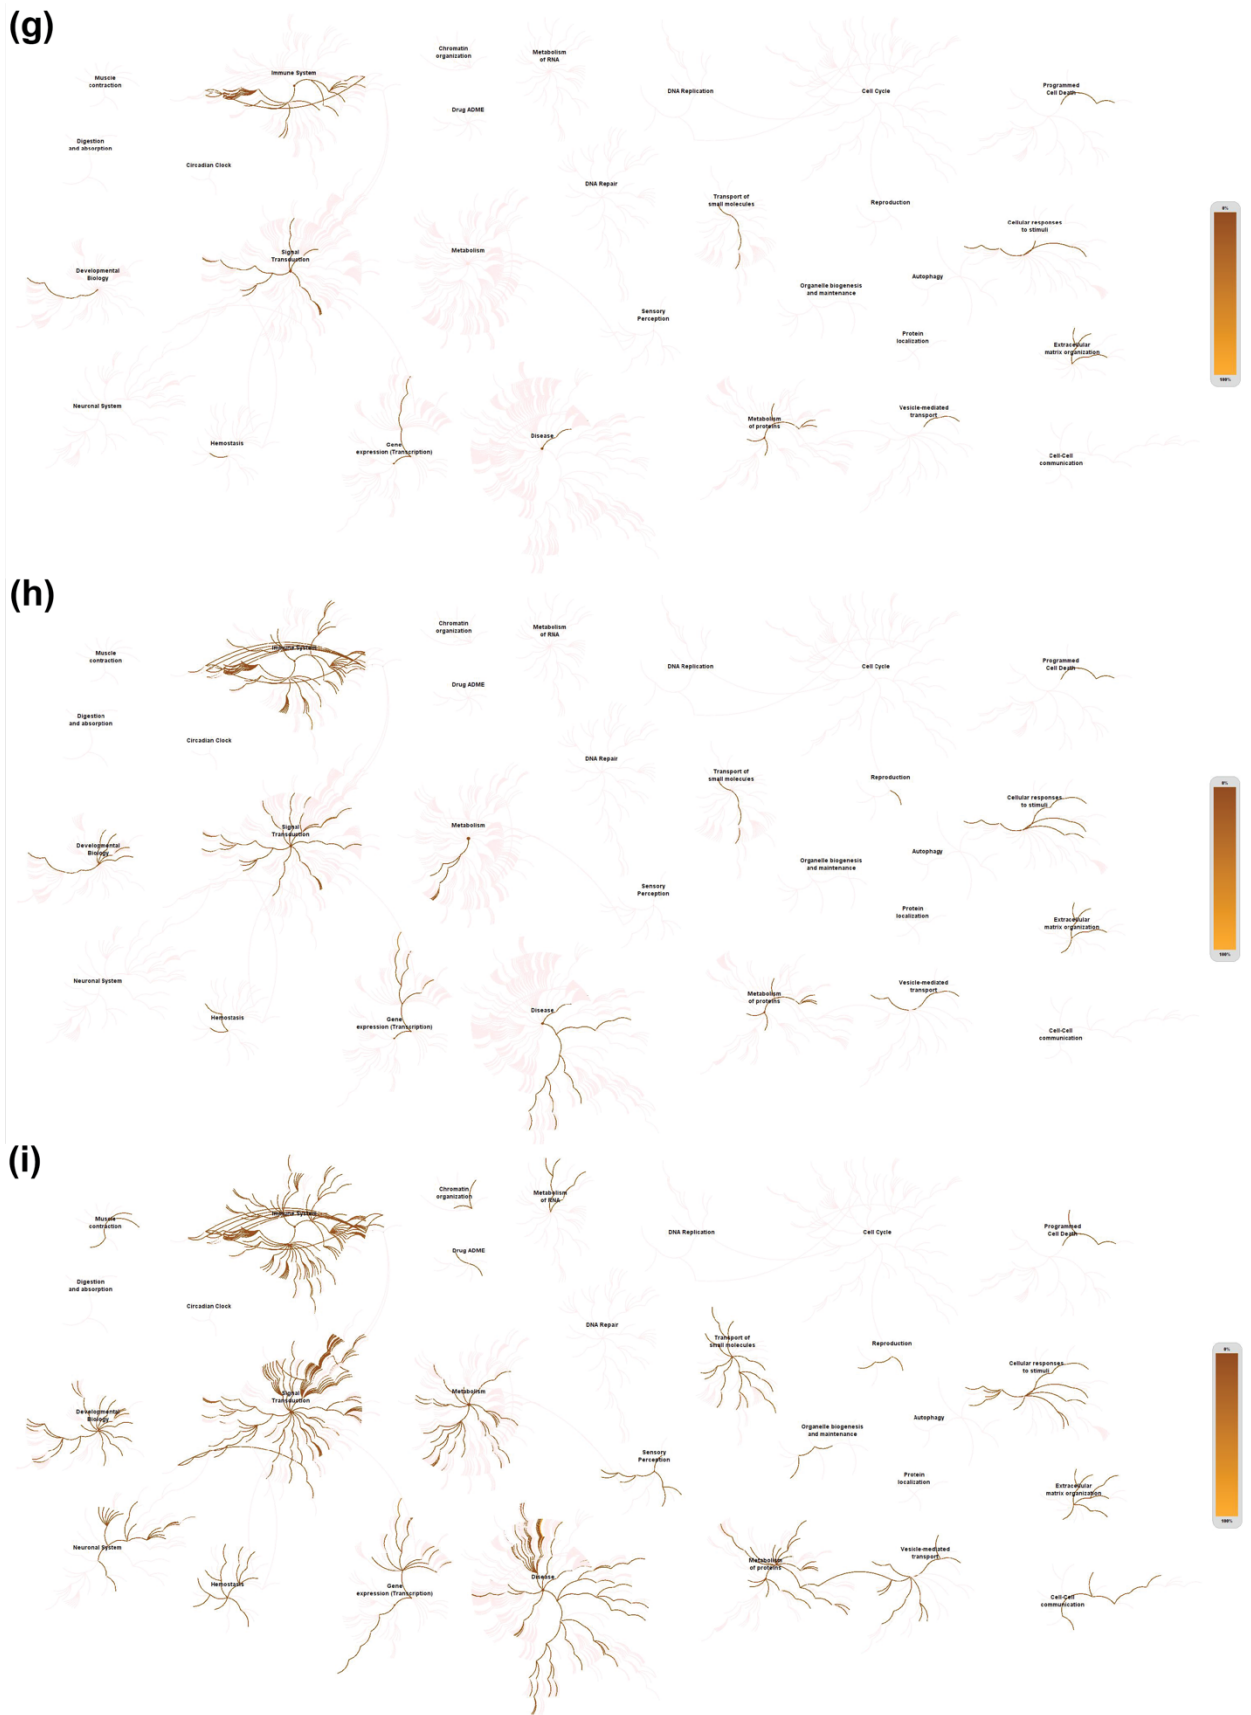

**Supplementary Figure 2.** Genome-wide overview of the over-representation analysis arranged in a hierarchical structure. The center of each cluster represents the root of a main pathway, with each subsequent node corresponding to lower-level pathways within the hierarchy. Results are shown for Ect cells treated with (a) Live, (b) BFS, and (c) bEV; End cells treated with (d) Live, (e) BFS, and (f) bEV; and VK2 cells treated with (g) Live, (h) BFS, and (i) bEV *M. mulieris* exposure. Color intensity reflects the number of entities enriched within each pathway.

## Supplementary Information

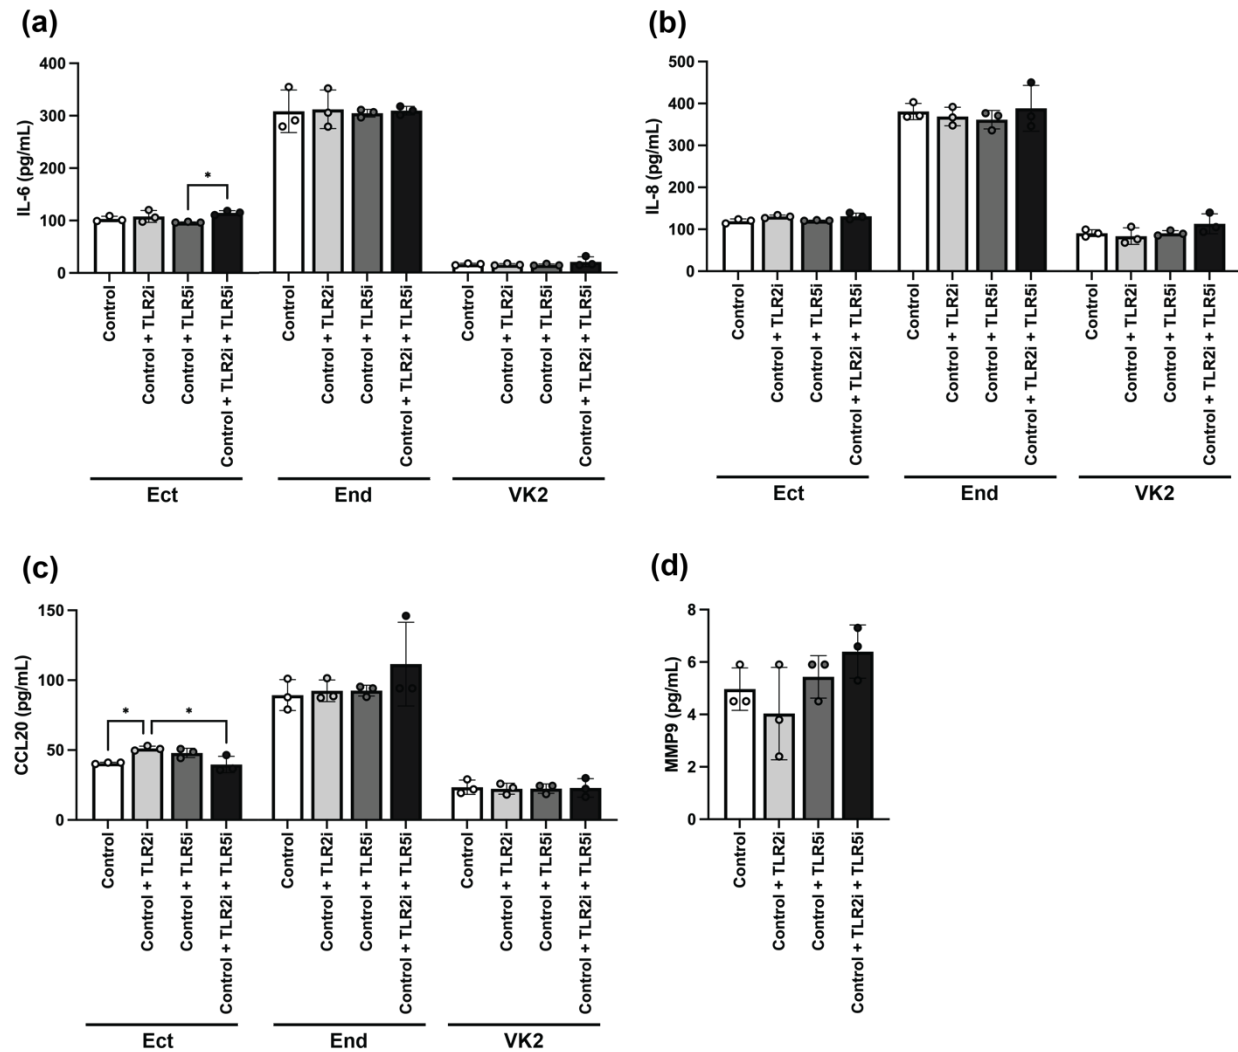

**Supplementary Figure 3.** Negative control test confirming that hTLR2 inhibitor (TLR2i) and hTLR5 inhibitor (TLR5i) did not affect markers of interest. Bar plots show the levels of (a) IL-6, (b) CCL20, and (c) IL-8 in Ect, End, and VK2 cells. (d) MMP9 treated with TLR2i and/or TLR5i in VK2 cells. Bar plots represent the mean and the error bars for the standard deviation. A one-way ANOVA was used to compare the differences between the groups, and one-way ANOVA was used, followed by Tukey's multiple comparison test. The statistical significance denoted by “\*” ( $p < 0.05$ ).

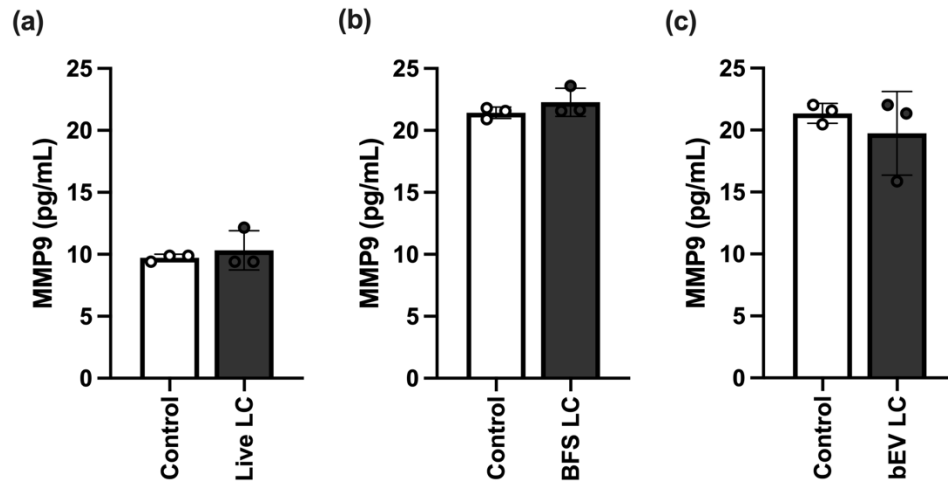

**Supplementary Fig 4.** MMP9 protein levels produced by VK2 cells in response to *L. crispatus* (LC) exposure. MMP9 levels were measured in response to (a) Live, (b) BFS, and (c) bEV LC. Bar plots represent the mean and the error bars for the standard deviation. An unpaired t-test was used to compare MMP9 concentrations between groups.



### Supplementary Data Legends

**Supplementary Data 1.** Raw counts of gene expression from RNA-seq analysis when Ect cells were exposed to either live *M. mulieris* or cell culture media (control, NT).

**Supplementary Data 2.** Raw counts of gene expression from RNA-seq analysis when Ect cells were exposed to either BFS *M. mulieris* or a 1:100 dilution of NYCIII media in cell culture media (control, Sup-ctrl).

**Supplementary Data 3.** Raw counts of gene expression from RNA-seq analysis when Ect cells were exposed to either bEV *M. mulieris* or cell culture media containing the same volume of bEV suspension media as the treated samples in the bEV groups (control, bEV-ctrl).

**Supplementary Data 4.** Raw counts of gene expression from RNA-seq analysis when End cells were exposed to either live *M. mulieris* or cell culture media (control, NT).

**Supplementary Data 5.** Raw counts of gene expression from RNA-seq analysis when End cells were exposed to either BFS *M. mulieris* or a 1:100 dilution of NYCIII media in cell culture media (control, Sup-ctrl).

**Supplementary Data 6.** Raw counts of gene expression from RNA-seq analysis when End cells were exposed to either bEV *M. mulieris* or cell culture media containing the same volume of bEV suspension media as the treated samples in the bEV groups (control, bEV-ctrl).

**Supplementary Data 7.** Raw counts of gene expression from RNA-seq analysis when VK2 cells were exposed to either live *M. mulieris* or cell culture media (control, NT).

**Supplementary Data 8.** Raw counts of gene expression from RNA-seq analysis when VK2 cells were exposed to either BFS *M. mulieris* or a 1:100 dilution of NYCIII media in cell culture media (control, Sup-ctrl).

## Supplementary Information

**Supplementary Data 9.** Raw counts of gene expression from RNA-seq analysis when VK2 cells were exposed to either bEV *M. mulieris* or cell culture media containing the same volume of bEV suspension media as the treated samples in the bEV groups (control, bEV-ctrl).

**Supplementary Data 10.** DEGs identified by Live, BFS, and/or bEV *M. mulieris* exposure in Ect, End, and VK2 cells. DEGs identified in two forms of *M. mulieris* exposure are summarized as combinations (e.g., Live/BFS).

**Supplementary Data 11.** Summary of pathway analysis results on DEGs uniquely altered by bEV treatment.

**Supplementary Data 12.** The fold change (FC) and FDR-corrected p-values (adj p-value) for the significantly altered main pathways by *M. mulieris* bEV treatment in VK2 cells.

**Supplementary Data 13.** The fold change (FC) and FDR-corrected p-values (adj p-value) for the significantly altered sub-pathways by *M. mulieris* bEV treatment in VK2 cells.

**Supplementary Data 14.** The fold change (FC) and FDR-corrected p-values (adj p-value) for the DEGs by *M. mulieris* bEV treatment in VK2 cells.
