# Supplementary material for: Mobiluncus mulieris Alters the Transcriptomic Profile of Cervicovaginal Epithelial Cells, Shedding Light on Molecular Drivers of Adverse Reproductive Outcomes
Source: Research Square preprint supplement (doi:10.21203/rs.3.rs-6270025/v1), 2025-03-24
Supplement: Supplementary file 1 [file 69724999ce947a6b86e4eb39.xlsx]

## Sheet: Supplementary Data 1
Gene	Ect-Live-MM-3	Ect-Live-MM-2	Ect-Live-MM-1	Ect-NT-3	Ect-NT-2	Ect-NT-1
ENSG00000223972	0	0	1	1	0	0
ENSG00000227232	140	107	156	175	144	154
ENSG00000278267	10	12	15	18	9	10
ENSG00000243485	0	1	0	0	0	1
ENSG00000237613	0	0	0	0	0	0
ENSG00000268020	0	1	0	0	0	0
ENSG00000240361	0	0	0	0	0	4
ENSG00000186092	0	1	0	0	0	0
ENSG00000238009	6	6	8	4	9	10
ENSG00000239945	0	0	0	0	0	0
ENSG00000233750	35	42	30	37	26	32
ENSG00000268903	109	110	128	140	133	111
ENSG00000269981	183	183	164	261	239	250
ENSG00000239906	4	5	4	5	7	8
ENSG00000241860	30	23	20	21	21	20
ENSG00000222623	4	2	1	0	1	1
ENSG00000241599	0	0	0	0	0	0
ENSG00000279928	0	0	2	0	3	2
ENSG00000279457	223	211	218	290	232	212
ENSG00000273874	0	0	0	1	1	0
ENSG00000228463	14	14	12	12	25	12
ENSG00000241670	0	0	0	0	0	0
ENSG00000236679	0	0	0	0	0	1
ENSG00000236743	0	1	1	0	0	0
ENSG00000236601	3	1	1	2	1	2
ENSG00000237094	33	26	20	24	26	24
ENSG00000269732	0	0	0	0	0	0
ENSG00000278566	0	0	0	0	0	0
ENSG00000224813	0	0	0	0	0	0
ENSG00000233653	0	0	1	0	0	0
ENSG00000250575	2	0	1	1	0	1
ENSG00000278757	3	0	1	1	1	0
ENSG00000230021	2	0	0	0	2	2
ENSG00000235146	0	0	0	0	0	1
ENSG00000225972	2	4	3	8	8	4
ENSG00000225630	1640	1724	1847	2121	1564	1706
ENSG00000237973	538	606	607	798	631	592
ENSG00000278791	0	0	0	0	0	0
ENSG00000229344	13	27	23	23	4	14
ENSG00000240409	9	7	11	18	13	6
ENSG00000248527	15266	13491	15729	18358	13997	14793
ENSG00000198744	12	24	20	12	21	12
ENSG00000268663	0	0	0	0	0	0
ENSG00000273547	0	0	0	0	0	0
ENSG00000283574	2	4	0	0	0	0
ENSG00000229376	2	3	4	10	3	4
ENSG00000228327	252	227	238	312	288	314
ENSG00000223181	0	0	1	1	0	0
ENSG00000229905	1	0	0	0	0	1
ENSG00000237491	30	41	30	42	37	39
ENSG00000230092	14	12	10	11	13	15
ENSG00000177757	11	5	14	14	9	16
ENSG00000228794	376	293	352	450	361	368
ENSG00000225880	23	25	32	29	16	22
ENSG00000230368	0	0	0	2	1	0
ENSG00000234711	0	1	0	0	0	0
ENSG00000283040	0	0	0	0	0	0
ENSG00000272438	9	10	2	8	11	4
ENSG00000230699	13	21	15	12	19	12
ENSG00000241180	3	0	0	4	0	1
ENSG00000223764	1	8	7	2	10	6
ENSG00000187634	30	23	37	30	24	24
ENSG00000188976	5641	5131	5643	6711	5910	5101
ENSG00000187961	723	586	751	871	681	669
ENSG00000187583	568	483	570	605	471	469
ENSG00000187642	275	241	242	305	241	225
ENSG00000272512	20	25	16	27	18	25
ENSG00000188290	795	752	865	997	668	439
ENSG00000187608	597	587	670	889	567	601
ENSG00000231702	1	1	1	3	1	1
ENSG00000224969	6	3	1	4	4	0
ENSG00000188157	27981	24508	25813	28642	24964	22193
ENSG00000242590	0	0	0	0	0	0
ENSG00000217801	334	344	326	361	302	270
ENSG00000273443	133	106	102	123	95	98
ENSG00000237330	86	78	82	76	55	50
ENSG00000131591	644	518	655	747	618	591
ENSG00000223823	0	0	2	0	0	0
ENSG00000207730	11	2	7	14	7	10
ENSG00000207607	23	17	10	11	16	9
ENSG00000198976	15	18	9	18	13	15
ENSG00000272141	68	55	67	64	71	38
ENSG00000205231	6	5	5	5	5	6
ENSG00000162571	15	13	20	27	15	20
ENSG00000186891	68	68	74	60	89	67
ENSG00000186827	1	1	3	3	0	0
ENSG00000078808	5300	4849	5228	6048	5042	4230
ENSG00000176022	622	538	598	723	550	444
ENSG00000184163	57	63	49	54	65	68
ENSG00000260179	10	6	5	12	14	11
ENSG00000160087	1791	1639	1960	2165	1912	1596
ENSG00000230415	28	24	29	41	39	23
ENSG00000162572	72	73	70	80	83	92
ENSG00000131584	2012	1918	2182	2575	2174	1961
ENSG00000278073	0	0	0	0	0	0
ENSG00000169972	673	596	637	747	611	553
ENSG00000127054	3344	3048	3272	3974	3325	3074
ENSG00000240731	127	93	106	132	121	110
ENSG00000224051	1519	1344	1586	1734	1503	1297
ENSG00000169962	68	64	84	120	97	63
ENSG00000107404	5375	4853	5381	6367	5295	4574
ENSG00000162576	609	564	606	719	670	553
ENSG00000175756	3663	3460	3722	4475	3859	3215
ENSG00000223663	0	0	0	3	1	1
ENSG00000221978	4135	3835	4162	4642	4095	3872
ENSG00000224870	792	736	727	910	789	720
ENSG00000242485	1938	1781	1996	2418	2046	1618
ENSG00000264293	0	0	0	0	0	0
ENSG00000272455	56	61	62	79	54	73
ENSG00000235098	453	455	448	552	486	384
ENSG00000225905	28	21	18	34	27	26
ENSG00000205116	1	1	0	1	0	1
ENSG00000225285	1	3	1	4	4	0
ENSG00000179403	1275	1155	1274	1402	1138	964
ENSG00000215915	62	33	55	85	61	58
ENSG00000160072	2616	2470	2774	3035	2641	2334
ENSG00000197785	2064	2001	2185	2574	2086	1707
ENSG00000205090	55	57	53	56	47	49
ENSG00000160075	4287	4164	4580	5262	4241	3681
ENSG00000215014	15	14	22	12	19	16
ENSG00000279244	0	0	0	0	0	0
ENSG00000274481	0	0	0	0	0	0
ENSG00000228594	1016	874	1108	1254	994	858
ENSG00000272106	63	59	60	76	66	72
ENSG00000197530	2260	2137	2228	2693	2203	1850
ENSG00000189409	20	17	17	23	20	16
ENSG00000248333	2537	2375	2459	2963	2604	2142
ENSG00000272004	5	3	6	5	2	6
ENSG00000189339	1851	1649	1817	2108	1810	1578
ENSG00000269737	51	43	55	58	61	55
ENSG00000215914	0	0	0	0	2	0
ENSG00000008128	662	689	673	822	770	692
ENSG00000268575	95	98	115	130	136	124
ENSG00000227775	134	97	108	130	133	146
ENSG00000215790	221	192	168	209	194	178
ENSG00000008130	2236	2015	2284	2698	2209	2065
ENSG00000078369	18563	17890	19995	22279	17771	16474
ENSG00000231050	36	25	30	40	32	34
ENSG00000169885	14	22	17	17	11	8
ENSG00000178821	69	49	62	93	81	53
ENSG00000142609	8	4	2	5	6	6
ENSG00000233542	0	0	0	0	0	1
ENSG00000187730	0	0	1	2	1	0
ENSG00000226969	7	2	2	1	0	0
ENSG00000067606	1735	1481	1682	1964	1597	1463
ENSG00000271806	18	9	9	15	9	13
ENSG00000182873	150	144	155	165	136	120
ENSG00000162585	1146	1031	1013	1306	1117	1019
ENSG00000234396	1	3	0	2	0	3
ENSG00000157933	2480	2218	2428	2829	2308	2129
ENSG00000116151	248	260	308	335	282	223
ENSG00000272161	0	0	0	2	0	0
ENSG00000269896	46	24	25	43	33	25
ENSG00000272420	4	6	6	12	16	4
ENSG00000157916	3372	3043	3406	4080	3332	2968
ENSG00000157911	1000	886	909	1173	1010	937
ENSG00000149527	4950	4393	4736	5634	4890	4513
ENSG00000224387	32	26	35	33	27	25
ENSG00000229393	33	33	36	34	32	31
ENSG00000157881	1221	1087	1318	1592	1245	1140
ENSG00000197921	4	9	12	11	10	4
ENSG00000272449	34	28	36	40	36	22
ENSG00000238164	22	32	17	26	25	29
ENSG00000157873	259	274	285	268	228	237
ENSG00000225931	0	0	0	0	0	0
ENSG00000228037	3	1	1	1	1	1
ENSG00000157870	1382	1280	1418	1676	1379	1177
ENSG00000142606	0	2	0	2	3	2
ENSG00000237058	0	0	0	0	0	0
ENSG00000215912	7	23	4	20	18	11
ENSG00000283259	0	0	0	0	0	0
ENSG00000233234	0	0	0	0	0	0
ENSG00000231630	0	0	1	2	1	1
ENSG00000169717	0	0	0	0	0	0
ENSG00000177133	1	0	0	0	0	0
ENSG00000142611	8	3	6	7	11	9
ENSG00000283572	0	0	0	0	0	0
ENSG00000226286	0	0	0	0	0	0
ENSG00000279839	0	0	1	0	0	0
ENSG00000272235	0	1	0	0	0	0
ENSG00000130762	1573	1332	1439	1709	1483	1336
ENSG00000272088	0	1	0	0	2	1
ENSG00000162591	614	582	587	704	588	551
ENSG00000207776	0	0	0	0	0	0
ENSG00000238260	17	27	23	13	10	13
ENSG00000158109	1724	1600	1800	2094	1682	1517
ENSG00000116213	728	626	743	824	695	648
ENSG00000078900	155	131	140	192	153	145
ENSG00000227589	1	1	0	3	1	2
ENSG00000235131	2	1	4	0	0	1
ENSG00000227372	1667	1535	1587	2014	1638	1515
ENSG00000276189	0	0	0	0	0	0
ENSG00000162592	3	3	3	8	8	4
ENSG00000235169	91	74	79	106	69	49
ENSG00000130764	2257	2167	2345	2804	2323	1867
ENSG00000266075	2	3	1	2	1	1
ENSG00000272153	29	49	38	55	34	40
ENSG00000116198	1619	1335	1515	1798	1477	1351
ENSG00000169598	244	194	228	328	241	248
ENSG00000198912	1186	1110	1332	1536	1324	1143
ENSG00000236423	58	53	58	61	37	48
ENSG00000233304	0	0	0	0	0	0
ENSG00000226374	0	0	0	0	0	0
ENSG00000229280	0	0	0	0	0	0
ENSG00000235054	0	0	0	0	0	0
ENSG00000227169	0	0	0	0	0	0
ENSG00000232596	0	0	0	0	0	0
ENSG00000196581	232	244	260	295	245	201
ENSG00000231510	0	0	0	0	0	0
ENSG00000260972	0	0	0	0	0	0
ENSG00000283356	0	0	0	0	0	0
ENSG00000236948	1	1	0	1	0	0
ENSG00000264341	0	0	0	0	0	0
ENSG00000264101	4	2	1	1	1	2
ENSG00000131697	1156	957	1107	1323	1122	1047
ENSG00000069424	605	520	546	664	582	479
ENSG00000116254	49	48	47	62	56	40
ENSG00000116251	18062	17041	18884	21686	18689	15564
ENSG00000226944	3	3	3	4	4	3
ENSG00000158286	766	628	722	705	615	577
ENSG00000116237	4582	4046	4389	5550	4373	3707
ENSG00000225077	35	47	44	69	51	35
ENSG00000173673	0	1	0	0	0	0
ENSG00000158292	3277	3068	3245	3958	3141	2836
ENSG00000097021	6191	5682	6308	7487	6432	5269
ENSG00000271746	0	0	0	0	0	0
ENSG00000069812	1600	1380	1649	2148	1690	1361
ENSG00000187017	899	820	928	1146	877	765
ENSG00000265392	0	0	0	0	0	0
ENSG00000231868	29	7	15	15	16	19
ENSG00000215788	1624	1362	1465	1671	1434	1450
ENSG00000171680	3681	3192	3228	3972	3285	3200
ENSG00000162408	1130	1080	1116	1479	1214	944
ENSG00000253022	1	0	1	0	0	2
ENSG00000229519	7	6	16	12	5	4
ENSG00000173662	3	1	3	5	2	0
ENSG00000204859	723	643	753	868	734	679
ENSG00000162413	1824	1533	1654	1930	1574	1412
ENSG00000116273	1916	1746	1863	2283	1825	1677
ENSG00000041988	367	353	429	471	385	329
ENSG00000007923	2604	2379	2495	3048	2615	2361
ENSG00000228750	0	0	0	0	0	0
ENSG00000237436	7	8	14	8	7	4
ENSG00000171735	1744	1658	1729	2171	1760	1458
ENSG00000227950	0	0	0	1	0	0
ENSG00000237365	0	0	0	0	0	0
ENSG00000207056	0	0	0	0	0	0
ENSG00000237402	0	1	1	0	0	0
ENSG00000237728	0	0	0	0	0	0
ENSG00000225126	0	0	0	0	0	0
ENSG00000270171	0	0	0	0	0	0
ENSG00000270035	0	0	0	0	0	0
ENSG00000269978	0	0	0	0	0	0
ENSG00000049245	3744	3534	3887	4514	3667	3514
ENSG00000269925	23	16	25	26	39	21
ENSG00000049246	230	219	211	296	239	240
ENSG00000236266	10	3	6	11	3	8
ENSG00000049247	0	0	0	0	0	0
ENSG00000049249	56	35	40	32	16	24
ENSG00000270330	0	0	0	0	0	0
ENSG00000116288	7775	7687	8407	9961	8407	7065
ENSG00000200344	1	2	1	0	1	7
ENSG00000116285	16658	15533	17194	19662	16002	15308
ENSG00000238290	63	60	62	59	62	36
ENSG00000232848	0	2	2	2	1	0
ENSG00000229305	1	3	0	2	0	0
ENSG00000227634	3	2	2	3	2	1
ENSG00000200975	0	0	0	0	0	0
ENSG00000233645	0	0	0	0	1	0
ENSG00000251977	0	0	0	0	0	0
ENSG00000162426	97	72	107	132	129	88
ENSG00000252254	2	1	1	0	1	0
ENSG00000142599	3664	3249	3458	4053	3209	3180
ENSG00000232912	2	0	3	2	0	2
ENSG00000221083	0	0	0	0	1	1
ENSG00000270282	0	1	0	1	0	0
ENSG00000234619	1	0	0	3	0	0
ENSG00000224315	11	3	1	2	0	1
ENSG00000222511	1	1	0	3	2	0
ENSG00000226545	3	1	4	4	2	1
ENSG00000228423	3	1	4	6	3	5
ENSG00000229716	0	0	0	0	0	0
ENSG00000074800	104468	96460	109573	125936	105493	94453
ENSG00000274258	6	3	2	1	0	1
ENSG00000236269	43	45	49	44	43	44
ENSG00000230679	6	5	3	6	8	4
ENSG00000201725	0	0	0	0	2	0
ENSG00000238249	0	2	1	1	0	2
ENSG00000232208	0	0	0	0	0	0
ENSG00000232663	0	0	0	0	0	0
ENSG00000131686	0	0	0	4	0	1
ENSG00000265141	0	0	0	0	0	0
ENSG00000197241	0	0	1	0	0	0
ENSG00000142583	61	55	52	94	100	57
ENSG00000252404	0	0	0	0	0	0
ENSG00000180758	465	419	503	620	514	461
ENSG00000228526	222	191	208	216	229	148
ENSG00000234546	106	105	99	137	109	96
ENSG00000281937	4	11	2	1	4	3
ENSG00000049239	1949	1705	1787	2226	1817	1682
ENSG00000171621	983	838	976	1095	814	754
ENSG00000252956	0	0	0	0	0	0
ENSG00000235263	0	0	0	0	0	0
ENSG00000171612	268	254	282	303	274	234
ENSG00000231181	3	4	11	12	4	4
ENSG00000188807	646	518	618	823	665	554
ENSG00000171608	1625	1510	1607	1538	1273	1389
ENSG00000179840	0	0	0	0	0	0
ENSG00000233268	0	0	0	0	0	0
ENSG00000231789	23	21	24	22	21	23
ENSG00000171603	17915	16894	18037	21454	17606	15824
ENSG00000271264	0	2	0	1	0	0
ENSG00000280113	8	7	7	3	8	7
ENSG00000178585	3497	3173	3653	4371	3581	3176
ENSG00000223989	0	0	0	0	0	0
ENSG00000162441	1717	1560	1630	2022	1695	1485
ENSG00000228150	40	36	37	44	33	35
ENSG00000173614	742	731	727	876	736	590
ENSG00000202415	9	5	11	8	12	6
ENSG00000283611	3	2	9	6	4	3
ENSG00000265521	0	1	3	2	1	1
ENSG00000241326	0	0	0	0	0	0
ENSG00000162444	28	29	36	33	28	31
ENSG00000130939	3371	3012	3128	3994	3188	3112
ENSG00000224340	1	1	0	1	0	1
ENSG00000233623	1	3	0	2	0	4
ENSG00000201746	5	5	0	3	2	0
ENSG00000054523	6475	5887	6390	7571	6127	5652
ENSG00000264881	0	0	0	0	0	0
ENSG00000199562	6	1	0	1	7	3
ENSG00000264501	0	0	0	0	0	0
ENSG00000142657	9017	8272	9349	10212	8836	7791
ENSG00000271989	3	3	3	3	3	3
ENSG00000251503	43	36	50	45	38	36
ENSG00000175279	341	323	379	409	383	325
ENSG00000241563	9	7	5	8	7	10
ENSG00000160049	4564	4129	4359	5505	4764	4016
ENSG00000203469	0	0	0	0	0	0
ENSG00000142655	1091	1015	1075	1176	1026	957
ENSG00000243267	2	1	0	0	1	2
ENSG00000130940	548	513	560	673	563	566
ENSG00000272078	38	28	38	43	30	34
ENSG00000225158	0	0	0	0	0	2
ENSG00000175262	7	3	3	1	5	2
ENSG00000215785	1	0	0	1	0	3
ENSG00000120948	6501	6498	6844	8096	6567	6016
ENSG00000277726	1	0	0	0	0	0
ENSG00000009724	59	44	39	58	55	61
ENSG00000271895	36	38	35	50	47	45
ENSG00000116649	2608	2509	2992	3450	2871	2432
ENSG00000171824	4419	3938	4537	5462	4302	4220
ENSG00000226849	30	17	19	47	20	18
ENSG00000230337	27	17	17	14	23	18
ENSG00000198793	5170	4427	4786	6170	4918	4669
ENSG00000225602	2	0	2	0	3	3
ENSG00000253086	0	0	0	0	0	2
ENSG00000171819	1	2	2	6	1	2
ENSG00000207451	0	0	0	0	0	0
ENSG00000238173	1	1	2	0	0	0
ENSG00000120942	712	665	658	859	714	613
ENSG00000238199	4	0	1	4	1	0
ENSG00000224338	0	0	0	0	0	0
ENSG00000204624	797	689	772	820	704	657
ENSG00000235643	47	46	71	53	50	42
ENSG00000116661	5955	5774	6150	6962	5801	4803
ENSG00000132879	1251	1137	1265	1437	1279	1113
ENSG00000116663	326	310	340	407	293	295
ENSG00000116670	1661	1566	1687	1942	1708	1433
ENSG00000162490	5	3	4	1	0	3
ENSG00000177674	2301	2125	2465	2713	2242	1998
ENSG00000215910	0	0	0	1	0	1
ENSG00000177553	0	0	0	0	0	0
ENSG00000177000	949	811	908	956	799	724
ENSG00000011021	1079	1005	1113	1285	1106	1064
ENSG00000242349	50	44	49	68	55	47
ENSG00000276470	0	0	0	0	0	0
ENSG00000278852	0	0	0	0	0	0
ENSG00000175206	22	8	17	16	16	26
ENSG00000275915	0	0	0	0	0	0
ENSG00000120937	0	0	0	0	0	2
ENSG00000224904	0	0	0	0	0	0
ENSG00000199347	0	2	3	3	0	1
ENSG00000201801	1	0	3	1	2	0
ENSG00000116685	2416	2410	2576	3213	2482	2163
ENSG00000083444	11397	10582	11552	13957	11162	10383
ENSG00000116688	9759	8738	9572	11757	9830	8915
ENSG00000270914	0	1	0	0	1	0
ENSG00000116691	1360	1188	1363	1592	1385	1172
ENSG00000202461	10	7	6	8	6	5
ENSG00000276869	0	0	1	0	1	0
ENSG00000243539	0	0	0	0	0	0
ENSG00000120949	556	580	580	721	587	527
ENSG00000201135	0	0	0	0	0	0
ENSG00000227875	0	0	0	0	0	0
ENSG00000028137	108	89	95	118	74	77
ENSG00000263676	0	0	0	0	0	0
ENSG00000225196	0	0	0	0	0	0
ENSG00000252969	0	0	0	0	0	0
ENSG00000048707	4334	3766	4080	4958	3868	3862
ENSG00000239149	9	9	12	12	15	10
ENSG00000229484	0	0	0	0	0	0
ENSG00000162496	837	770	793	819	610	604
ENSG00000221340	2	0	2	2	1	1
ENSG00000276830	1	1	0	2	1	1
ENSG00000272482	9	5	8	7	6	10
ENSG00000204518	0	0	0	0	0	0
ENSG00000226166	0	0	0	0	0	0
ENSG00000188984	0	0	0	0	0	0
ENSG00000157330	0	0	0	0	0	0
ENSG00000116726	0	0	0	0	0	0
ENSG00000116721	0	0	0	0	0	0
ENSG00000228338	0	0	0	0	0	0
ENSG00000239810	0	0	0	0	0	0
ENSG00000231103	0	0	0	0	0	0
ENSG00000179172	0	0	0	0	1	0
ENSG00000120952	0	0	0	0	0	0
ENSG00000243073	0	0	0	0	0	0
ENSG00000187545	0	0	0	0	0	0
ENSG00000204510	0	0	0	0	0	0
ENSG00000207434	0	0	0	0	0	0
ENSG00000234064	0	0	0	0	0	0
ENSG00000232423	0	0	0	0	0	0
ENSG00000274178	0	0	0	0	0	0
ENSG00000274764	0	0	0	0	0	0
ENSG00000229571	0	0	0	0	0	0
ENSG00000277058	0	0	0	0	0	0
ENSG00000277862	0	0	0	0	0	0
ENSG00000236179	0	0	0	0	0	0
ENSG00000275774	0	0	0	0	0	0
ENSG00000229978	0	0	0	0	0	0
ENSG00000233336	0	0	0	0	0	0
ENSG00000280267	0	0	0	0	0	0
ENSG00000179412	0	0	1	0	1	0
ENSG00000204505	0	0	0	0	0	0
ENSG00000279169	0	0	0	0	0	0
ENSG00000279804	0	0	0	0	0	0
ENSG00000250894	0	0	0	0	0	0
ENSG00000270601	0	0	0	0	0	0
ENSG00000231219	0	0	0	0	0	0
ENSG00000207511	0	0	0	0	0	0
ENSG00000182330	0	0	0	0	0	0
ENSG00000204501	0	0	0	0	0	0
ENSG00000237700	0	0	0	0	0	0
ENSG00000228229	0	0	0	0	0	0
ENSG00000204481	0	0	0	0	0	0
ENSG00000204480	0	0	0	0	0	0
ENSG00000204479	0	0	0	0	0	0
ENSG00000204478	0	0	0	0	0	0
ENSG00000162494	2	2	4	1	0	1
ENSG00000259961	0	0	0	0	0	0
ENSG00000215909	0	0	0	0	0	0
ENSG00000162493	880	826	923	1054	884	874
ENSG00000222952	0	0	0	0	0	0
ENSG00000237445	0	0	1	0	0	0
ENSG00000253085	0	0	0	0	0	0
ENSG00000116731	2083	1857	2093	2548	2119	1838
ENSG00000189337	471	478	493	592	532	433
ENSG00000252151	0	0	0	0	0	0
ENSG00000231606	0	2	0	0	0	0
ENSG00000234593	1	4	0	1	0	0
ENSG00000235829	0	0	0	0	0	0
ENSG00000175147	142	121	163	157	144	150
ENSG00000171729	1230	1151	1251	1393	1165	1041
ENSG00000204464	1	1	4	4	4	5
ENSG00000215720	0	2	1	4	3	2
ENSG00000278480	1	2	1	1	1	2
ENSG00000142621	53	50	46	55	50	37
ENSG00000233485	0	1	0	1	0	0
ENSG00000236045	1	0	0	0	4	0
ENSG00000228140	9	6	10	9	11	5
ENSG00000142634	7541	6906	7697	7802	6356	4942
ENSG00000162438	0	0	3	0	0	1
ENSG00000142615	0	0	0	0	0	1
ENSG00000215704	4	1	1	2	2	4
ENSG00000132906	372	316	400	430	373	331
ENSG00000116138	881	814	886	1104	895	867
ENSG00000251866	1	1	0	0	0	0
ENSG00000272510	5	2	2	1	1	0
ENSG00000116771	577	574	587	749	653	528
ENSG00000237301	10	8	10	15	13	13
ENSG00000235084	11	27	16	25	18	21
ENSG00000252417	0	1	0	0	0	0
ENSG00000236500	0	0	0	0	2	0
ENSG00000197312	2548	2388	2597	3120	2475	2356
ENSG00000215695	0	0	0	0	0	0
ENSG00000271742	1	0	0	1	0	2
ENSG00000116786	3716	3324	3669	4223	3584	3484
ENSG00000237938	45	40	46	40	40	36
ENSG00000162461	81	81	83	85	71	85
ENSG00000224459	4	2	3	1	5	4
ENSG00000162460	6	3	3	5	2	4
ENSG00000162458	7627	6648	7592	8737	7090	6787
ENSG00000224321	40	32	30	20	16	41
ENSG00000233954	188	175	213	198	194	147
ENSG00000178715	1	0	0	1	0	3
ENSG00000179743	179	179	204	205	184	156
ENSG00000065526	5499	4691	4988	5858	4669	4750
ENSG00000270620	1	0	0	0	0	1
ENSG00000116809	1269	1119	1212	1355	1106	1054
ENSG00000234607	0	0	0	1	1	1
ENSG00000231353	0	0	0	0	0	0
ENSG00000275503	0	0	0	0	0	0
ENSG00000224966	0	0	0	0	0	0
ENSG00000183888	0	0	0	0	0	0
ENSG00000233078	0	0	0	0	0	0
ENSG00000173641	0	1	4	1	0	3
ENSG00000186510	1	0	2	2	0	2
ENSG00000232456	2	5	6	2	4	6
ENSG00000184908	12	16	25	13	19	15
ENSG00000185519	103	104	110	152	109	77
ENSG00000142627	6251	5557	6310	6732	5651	5010
ENSG00000227959	53	42	42	63	49	38
ENSG00000224621	25	22	30	46	24	31
ENSG00000234166	0	0	0	0	0	0
ENSG00000142632	2172	1858	1973	2637	2191	2028
ENSG00000237276	220	196	174	233	206	179
ENSG00000132881	219	217	225	272	238	194
ENSG00000233929	1	8	4	8	9	4
ENSG00000037637	952	826	932	1159	940	904
ENSG00000055070	6780	6570	7221	8625	7190	6380
ENSG00000226457	2	3	4	2	0	9
ENSG00000187144	5	9	8	1	5	11
ENSG00000157191	2740	2678	2927	2974	2533	2311
ENSG00000226029	82	67	89	76	111	68
ENSG00000080947	338	297	297	405	351	340
ENSG00000206652	0	1	0	1	1	0
ENSG00000261135	10	12	6	10	5	9
ENSG00000224174	1	0	1	1	0	1
ENSG00000233421	18	23	16	14	15	15
ENSG00000277344	0	0	0	0	0	0
ENSG00000268991	0	0	0	0	0	0
ENSG00000225710	0	0	0	0	0	2
ENSG00000219481	806	740	756	905	781	723
ENSG00000271732	3	2	0	5	1	2
ENSG00000215908	905	825	879	968	890	817
ENSG00000186301	164	154	135	194	150	142
ENSG00000282143	0	0	0	1	0	0
ENSG00000207513	0	0	0	0	0	0
ENSG00000237847	0	0	0	0	0	0
ENSG00000280114	0	1	0	0	0	1
ENSG00000236698	43	48	53	71	67	50
ENSG00000268869	0	0	1	1	0	2
ENSG00000279151	0	0	0	0	0	0
ENSG00000279132	0	0	0	0	0	0
ENSG00000282740	0	0	0	0	0	2
ENSG00000058453	1972	1705	1836	2143	1952	1565
ENSG00000227684	4	2	1	3	1	3
ENSG00000207389	0	0	0	0	0	0
ENSG00000186715	79	75	90	96	97	76
ENSG00000223643	0	0	0	0	0	0
ENSG00000230239	0	0	0	0	0	0
ENSG00000263811	0	0	0	0	0	0
ENSG00000228549	52	43	45	59	61	41
ENSG00000277234	0	0	0	0	0	0
ENSG00000238142	109	102	111	127	155	115
ENSG00000235241	81	70	113	134	103	70
ENSG00000207005	3	2	2	4	3	1
ENSG00000272426	1	0	4	2	1	3
ENSG00000117122	2291	2134	2413	2737	2171	2103
ENSG00000226526	9	6	14	10	7	12
ENSG00000159363	3065	2732	2954	3327	2712	2481
ENSG00000117118	2710	2562	2889	3429	2722	2555
ENSG00000117115	268	249	239	354	309	256
ENSG00000204362	36	29	32	41	53	46
ENSG00000282843	3	3	2	1	6	5
ENSG00000142623	538	424	444	603	548	475
ENSG00000142619	522	426	398	747	675	512
ENSG00000266634	3	2	3	7	0	0
ENSG00000159339	7	8	10	15	19	14
ENSG00000280226	0	0	0	0	1	0
ENSG00000276747	0	0	0	0	0	0
ENSG00000179051	14939	13747	14989	17557	14250	12847
ENSG00000227751	0	0	0	0	0	0
ENSG00000074964	690	670	709	756	684	592
ENSG00000236648	0	0	0	0	0	0
ENSG00000117148	7	4	11	10	17	7
ENSG00000261781	0	0	0	0	0	0
ENSG00000117154	0	0	0	0	0	0
ENSG00000280222	0	0	0	0	0	0
ENSG00000230035	0	0	0	0	0	0
ENSG00000225387	0	0	0	0	0	0
ENSG00000179023	2	1	0	2	0	0
ENSG00000235282	0	0	0	0	0	0
ENSG00000225478	0	0	0	0	0	0
ENSG00000009709	0	0	0	0	0	1
ENSG00000179002	0	0	0	0	1	0
ENSG00000255275	0	0	2	0	0	1
ENSG00000159423	510	425	488	604	542	445
ENSG00000265606	1	1	0	0	0	0
ENSG00000221662	0	0	0	0	0	0
ENSG00000169991	1902	1761	1834	2414	1911	1643
ENSG00000272084	16	9	16	16	7	9
ENSG00000127481	15952	13372	14442	16872	13973	14198
ENSG00000230424	21	21	23	17	15	8
ENSG00000127463	4956	4669	5010	6093	5148	4848
ENSG00000053372	2595	2229	2701	3318	2672	2425
ENSG00000211454	19	7	16	8	17	12
ENSG00000162482	52	49	62	75	61	50
ENSG00000270728	63	44	44	30	47	42
ENSG00000053371	1842	1662	1858	2411	1889	1596
ENSG00000200403	6	6	2	2	3	1
ENSG00000040487	569	582	677	753	602	534
ENSG00000077549	9984	9377	10033	11941	9740	8098
ENSG00000240490	0	0	0	1	1	0
ENSG00000201609	0	0	0	0	0	0
ENSG00000235185	0	1	0	3	0	1
ENSG00000173436	2270	2538	2493	3089	2761	2350
ENSG00000270136	1	3	5	3	1	3
ENSG00000226396	27	32	34	26	27	19
ENSG00000158747	1568	1558	1623	1857	1347	1183
ENSG00000158748	0	0	5	1	2	0
ENSG00000162542	612	550	605	763	539	549
ENSG00000178828	0	0	0	0	0	0
ENSG00000235434	0	0	0	0	0	0
ENSG00000169914	634	615	647	851	646	603
ENSG00000188784	0	0	0	0	0	0
ENSG00000242688	0	0	0	0	0	0
ENSG00000188257	1	0	0	0	0	0
ENSG00000127472	0	0	0	0	0	0
ENSG00000117215	0	0	0	0	0	0
ENSG00000158786	5	3	3	5	2	1
ENSG00000227066	1	1	4	3	3	4
ENSG00000187980	0	0	1	0	0	2
ENSG00000225986	0	0	0	0	0	0
ENSG00000162543	4	0	3	4	1	1
ENSG00000228105	0	0	0	0	0	0
ENSG00000158816	0	0	0	0	0	0
ENSG00000226664	0	0	0	0	0	1
ENSG00000236963	3	4	4	3	3	1
ENSG00000226487	0	0	0	0	0	0
ENSG00000162545	10873	11225	11574	15405	11812	9726
ENSG00000090432	1295	1179	1328	1598	1327	1201
ENSG00000215520	0	0	0	0	0	0
ENSG00000183114	18	30	24	31	17	21
ENSG00000158825	2807	2477	2890	3198	2705	2432
ENSG00000158828	1466	1316	1448	1557	1221	1060
ENSG00000117242	197	206	200	230	220	184
ENSG00000244038	8524	8031	8968	10408	8683	7847
ENSG00000117245	127	117	126	147	128	114
ENSG00000235432	1	0	0	0	1	2
ENSG00000189410	1517	1358	1551	1885	1530	1414
ENSG00000233069	7	5	5	7	3	8
ENSG00000127483	9991	9238	10044	12641	10346	9769
ENSG00000075151	5502	4903	5556	6643	5189	5048
ENSG00000251914	0	0	0	0	0	0
ENSG00000221808	0	0	0	0	2	0
ENSG00000233072	2	1	1	4	1	2
ENSG00000236073	3	2	0	1	0	2
ENSG00000235112	2	0	4	3	2	3
ENSG00000117298	6332	5353	5915	6613	5272	4994
ENSG00000236936	0	0	2	1	6	2
ENSG00000231105	18	21	16	18	18	16
ENSG00000236216	0	0	0	0	0	0
ENSG00000228823	0	0	0	0	0	0
ENSG00000236009	0	0	0	0	0	0
ENSG00000227001	24	15	21	27	26	29
ENSG00000187952	1	12	8	13	8	4
ENSG00000186543	1	0	0	1	0	1
ENSG00000142794	651	647	648	865	650	617
ENSG00000176378	3	0	3	1	0	4
ENSG00000162551	84	66	83	97	89	70
ENSG00000233431	0	0	0	0	0	0
ENSG00000076864	332	258	331	376	303	304
ENSG00000090686	3443	3315	3570	4208	3440	3258
ENSG00000231978	1	1	0	0	0	2
ENSG00000187942	52	59	47	42	42	41
ENSG00000142798	10979	9035	9729	10974	8998	8758
ENSG00000232037	4	0	0	0	2	0
ENSG00000283234	3	3	3	3	1	1
ENSG00000219073	0	0	3	0	2	0
ENSG00000273610	0	0	0	0	0	0
ENSG00000201919	0	0	0	0	0	0
ENSG00000142789	1	0	1	0	0	0
ENSG00000278124	0	0	0	0	0	0
ENSG00000201273	0	0	0	0	0	0
ENSG00000228397	14	10	11	7	9	5
ENSG00000218510	341	295	344	450	360	318
ENSG00000070831	14781	13997	15702	18243	15166	13470
ENSG00000230068	23	25	25	24	16	7
ENSG00000271428	11	8	9	12	13	14
ENSG00000271840	3	5	4	8	13	1
ENSG00000162552	190	154	190	162	114	117
ENSG00000266564	0	0	0	0	0	0
ENSG00000234397	0	0	0	0	0	0
ENSG00000279625	0	0	0	0	0	0
ENSG00000184677	1345	1204	1331	1574	1316	1224
ENSG00000237200	4	16	15	16	14	3
ENSG00000070886	4	6	5	4	6	2
ENSG00000276835	0	0	0	0	0	0
ENSG00000173372	0	0	0	0	0	0
ENSG00000159189	0	0	0	0	0	0
ENSG00000173369	0	0	0	0	0	0
ENSG00000133216	2256	1864	2045	2539	2114	1972
ENSG00000265422	0	0	0	0	0	0
ENSG00000225952	0	1	0	1	1	1
ENSG00000264014	0	0	0	0	0	0
ENSG00000215906	0	0	0	0	0	0
ENSG00000227868	4	4	7	14	12	9
ENSG00000004487	7046	6617	7425	8811	7212	6582
ENSG00000240553	0	2	1	3	1	1
ENSG00000263793	0	1	0	0	0	0
ENSG00000266802	0	0	1	1	0	0
ENSG00000169641	6618	5567	6394	7247	5855	5577
ENSG00000229010	4	5	2	0	0	3
ENSG00000206935	5	1	4	4	2	1
ENSG00000252578	3	1	1	4	2	2
ENSG00000179546	63	50	69	65	42	63
ENSG00000215381	0	0	0	0	0	0
ENSG00000261326	113	113	121	126	156	173
ENSG00000125944	10564	10035	11027	13051	10694	9803
ENSG00000125945	1513	1352	1571	1876	1604	1405
ENSG00000249087	166	116	143	165	142	137
ENSG00000201405	0	0	0	0	0	0
ENSG00000271420	4	0	1	2	0	0
ENSG00000204219	73	50	56	95	79	57
ENSG00000232482	0	0	0	1	0	1
ENSG00000088280	2414	2098	2414	3135	2718	2435
ENSG00000007968	301	279	315	340	292	251
ENSG00000235052	26	16	14	30	26	23
ENSG00000117318	1994	1870	1972	2635	2306	1885
ENSG00000197880	0	1	1	1	1	0
ENSG00000229239	0	0	0	0	1	0
ENSG00000142676	33896	32294	34725	39173	33512	26119
ENSG00000011007	2443	2349	2818	3139	2551	2380
ENSG00000236810	107	94	124	171	124	128
ENSG00000057757	1279	1121	1378	1634	1411	1145
ENSG00000011009	4185	3957	4420	5139	4347	3712
ENSG00000117308	2910	2629	2948	3431	2981	2423
ENSG00000117305	1153	1015	1103	1328	1141	962
ENSG00000179163	635	588	643	775	633	546
ENSG00000188822	0	0	0	0	0	1
ENSG00000229106	0	0	0	0	2	0
ENSG00000232557	0	0	0	0	0	0
ENSG00000264926	0	0	0	0	0	0
ENSG00000230228	0	0	0	0	0	0
ENSG00000189266	4583	4493	4906	5545	4564	4080
ENSG00000188529	4763	4355	4878	6136	4762	4271
ENSG00000215905	0	0	0	0	0	0
ENSG00000225315	1	0	3	1	0	0
ENSG00000142661	24	18	10	11	17	8
ENSG00000230703	0	0	0	0	0	0
ENSG00000142677	378	374	398	455	366	390
ENSG00000185436	1479	1329	1453	1676	1488	1249
ENSG00000230023	2	2	1	9	3	2
ENSG00000232298	14	16	23	13	9	14
ENSG00000158055	684	655	672	814	713	653
ENSG00000001460	1171	1016	1148	1331	1184	1038
ENSG00000001461	2601	2340	2468	3133	2602	2324
ENSG00000117602	2252	1962	2276	2449	2072	1867
ENSG00000264443	0	0	1	0	0	0
ENSG00000184454	5	3	5	5	4	2
ENSG00000227312	0	0	0	0	0	0
ENSG00000239106	0	0	0	0	0	0
ENSG00000133226	5521	4984	5535	6890	5812	5789
ENSG00000169504	16161	15355	17323	19089	15354	14650
ENSG00000238482	1	0	0	2	0	0
ENSG00000020633	2	4	3	1	0	5
ENSG00000278034	0	0	0	0	0	0
ENSG00000229162	2	8	4	6	3	2
ENSG00000261025	0	0	0	0	0	0
ENSG00000264371	0	0	0	0	0	0
ENSG00000233755	0	0	0	0	0	0
ENSG00000233419	0	0	0	0	0	0
ENSG00000231953	0	0	0	0	0	3
ENSG00000117614	1950	1856	2043	2233	1862	1621
ENSG00000117616	1445	1448	1500	1794	1492	1463
ENSG00000272432	8	7	8	3	4	0
ENSG00000261349	12	15	16	17	16	15
ENSG00000187010	24	17	26	26	17	29
ENSG00000224183	3	3	6	0	3	7
ENSG00000259984	6	8	7	2	1	4
ENSG00000183726	3775	3710	4016	4521	3903	3145
ENSG00000188672	37	51	44	50	67	37
ENSG00000238084	1	0	0	3	6	3
ENSG00000204178	1024	927	1003	1087	898	861
ENSG00000157978	2195	2016	2107	2629	2086	2060
ENSG00000225643	3	4	2	9	0	3
ENSG00000117643	17	24	11	14	27	17
ENSG00000233478	1	0	2	2	3	2
ENSG00000162430	4113	3483	3917	4739	3968	3550
ENSG00000255054	0	0	0	0	0	0
ENSG00000228172	33	28	44	44	31	38
ENSG00000117640	841	700	819	894	823	784
ENSG00000272478	0	0	0	0	0	0
ENSG00000127423	555	543	546	745	579	493
ENSG00000236528	0	0	1	5	1	0
ENSG00000182749	1780	1781	1806	2265	1939	1738
ENSG00000207302	0	0	1	0	0	0
ENSG00000117632	11402	10384	12068	14079	11671	10213
ENSG00000229786	1	2	2	2	3	0
ENSG00000223624	1	2	1	1	1	0
ENSG00000158006	701	607	685	851	687	637
ENSG00000207237	0	0	0	0	0	1
ENSG00000252190	0	0	0	0	0	0
ENSG00000252691	0	1	0	0	0	0
ENSG00000158008	30	29	18	26	35	30
ENSG00000158014	2	1	1	2	2	1
ENSG00000158022	4	0	0	2	1	3
ENSG00000175087	255	219	233	309	229	242
ENSG00000197245	11	6	7	3	4	2
ENSG00000282872	0	0	0	1	0	0
ENSG00000236782	23	15	17	19	15	11
ENSG00000142684	40	45	57	67	51	37
ENSG00000142675	932	871	962	1071	969	918
ENSG00000188782	0	3	2	6	3	1
ENSG00000236155	1	0	1	0	0	1
ENSG00000278572	0	0	0	1	0	0
ENSG00000130695	2551	2327	2503	3082	2644	2549
ENSG00000270733	1	5	5	1	3	8
ENSG00000142669	8838	8024	9385	10915	8873	7950
ENSG00000158062	821	733	730	944	778	745
ENSG00000169442	5	5	2	1	6	4
ENSG00000176092	1354	1327	1232	1530	1307	1153
ENSG00000225854	2	6	5	1	1	9
ENSG00000176083	0	0	0	0	0	0
ENSG00000131914	4	2	5	11	8	6
ENSG00000117682	1110	1033	1238	1460	1142	1086
ENSG00000223583	3	3	4	1	3	2
ENSG00000225891	4	3	3	8	9	2
ENSG00000198830	16044	14939	16894	20934	17327	14899
ENSG00000224129	0	0	0	0	0	0
ENSG00000117676	4520	4054	4599	5171	4354	3991
ENSG00000238705	0	0	0	0	0	0
ENSG00000243905	0	0	1	0	0	0
ENSG00000252802	0	0	0	0	0	0
ENSG00000252429	0	0	0	0	0	0
ENSG00000229247	0	0	0	0	0	0
ENSG00000238316	0	0	0	0	0	0
ENSG00000235069	0	0	0	0	0	0
ENSG00000260063	35	38	44	69	45	45
ENSG00000117713	5238	4722	4884	6150	4754	4649
ENSG00000060642	890	790	889	1134	925	844
ENSG00000241188	2	0	2	1	3	0
ENSG00000204160	1307	1188	1427	1551	1317	1089
ENSG00000175793	43527	39784	45309	48849	41125	36737
ENSG00000226698	0	0	0	0	0	0
ENSG00000142751	1209	1125	1285	1538	1293	1128
ENSG00000198746	641	608	724	754	724	573
ENSG00000090273	9278	8570	9757	11383	9412	7931
ENSG00000131910	12	11	15	19	15	12
ENSG00000175707	931	792	1009	1190	943	815
ENSG00000172746	7	3	2	4	7	2
ENSG00000224064	4	3	3	3	3	2
ENSG00000225294	2	4	6	9	4	6
ENSG00000253368	3798	3669	3989	4368	3424	2813
ENSG00000158246	1300	1178	1285	1614	1362	1169
ENSG00000280403	0	2	0	0	1	1
ENSG00000090020	4335	3567	4164	4550	3605	3615
ENSG00000229985	0	0	0	0	0	0
ENSG00000214973	0	1	0	0	1	4
ENSG00000225159	10	9	11	16	12	7
ENSG00000225990	0	0	0	0	0	0
ENSG00000224311	0	0	0	0	0	0
ENSG00000142784	2536	2182	2414	3001	2518	2204
ENSG00000252098	0	0	0	3	7	1
ENSG00000243659	2	0	2	1	1	0
ENSG00000186501	735	668	730	899	814	638
ENSG00000206888	1	1	4	1	2	4
ENSG00000241547	13	15	10	9	11	6
ENSG00000142765	1178	1078	1064	1300	1226	1103
ENSG00000142733	2589	2166	2328	2812	2419	2027
ENSG00000142748	7	14	8	12	15	10
ENSG00000174950	89	72	86	123	100	85
ENSG00000231207	0	0	2	0	0	0
ENSG00000181773	136	134	157	169	139	136
ENSG00000158195	11803	10665	11567	13617	11743	11155
ENSG00000241169	1	0	0	1	1	0
ENSG00000237429	5	5	1	6	7	5
ENSG00000126705	2096	1802	1998	2318	2009	1786
ENSG00000000938	12	5	16	11	8	6
ENSG00000235912	3	3	2	5	4	4
ENSG00000233975	4	2	0	0	0	0
ENSG00000126709	1365	1158	1298	1774	1181	1186
ENSG00000225886	3	4	4	13	11	3
ENSG00000206767	0	0	0	0	0	0
ENSG00000226662	0	0	0	0	0	0
ENSG00000207095	0	0	0	0	0	0
ENSG00000009780	491	437	506	656	517	501
ENSG00000231344	5	6	1	9	1	2
ENSG00000230833	1	0	1	0	0	2
ENSG00000117758	1050	1008	1119	1364	1029	948
ENSG00000269971	3	5	1	1	0	1
ENSG00000270031	3	5	0	4	1	5
ENSG00000223062	0	0	0	0	0	0
ENSG00000117751	2029	1968	2224	2716	2225	1968
ENSG00000252947	1	0	1	0	3	3
ENSG00000278868	0	0	0	0	0	0
ENSG00000130775	646	577	649	682	563	567
ENSG00000117748	2814	2596	2992	3422	2746	2577
ENSG00000130768	419	316	404	439	388	366
ENSG00000227050	1	5	0	3	2	0
ENSG00000158156	360	285	321	358	325	260
ENSG00000158161	1922	1782	1978	2452	1968	1776
ENSG00000238231	0	1	5	1	0	1
ENSG00000240750	2	3	3	1	3	1
ENSG00000228589	27	36	21	35	26	33
ENSG00000228943	1	0	0	0	0	0
ENSG00000214812	0	0	0	0	0	1
ENSG00000253005	3	1	1	0	0	0
ENSG00000169403	2447	2264	2469	2634	2024	1958
ENSG00000126698	4397	4218	4636	5644	4610	4191
ENSG00000130770	4783	4274	4803	5611	4902	3891
ENSG00000270605	112	102	112	146	111	109
ENSG00000271398	12	10	13	8	5	8
ENSG00000130766	2715	2281	2558	2615	2181	2064
ENSG00000130772	863	895	995	1160	936	886
ENSG00000204138	3177	2893	3132	3974	3154	3017
ENSG00000206779	3	0	0	0	0	1
ENSG00000229820	3	1	0	3	2	4
ENSG00000221216	0	3	1	2	2	1
ENSG00000180198	4599	4470	4874	5630	4875	4331
ENSG00000242125	1328	1246	1345	1695	1298	1182
ENSG00000274266	0	0	0	0	0	0
ENSG00000200087	49	42	39	73	29	38
ENSG00000231468	9	10	13	15	10	16
ENSG00000279443	61	67	74	84	92	60
ENSG00000180098	962	949	930	1061	921	869
ENSG00000197989	714	624	651	802	700	644
ENSG00000221539	24	27	26	30	35	21
ENSG00000278274	0	0	0	0	0	0
ENSG00000273544	0	0	0	0	0	0
ENSG00000274582	0	0	0	0	0	0
ENSG00000280498	0	0	0	0	0	0
ENSG00000120656	1025	954	1078	1249	1060	947
ENSG00000188060	10	13	9	14	19	13
ENSG00000229388	10	13	9	11	11	17
ENSG00000270103	0	0	0	0	0	0
ENSG00000274978	0	1	1	1	1	2
ENSG00000162419	987	938	1035	1145	984	946
ENSG00000252777	1	0	1	0	0	1
ENSG00000198492	2939	2685	3132	3910	3043	2692
ENSG00000116329	5	5	3	2	2	2
ENSG00000233427	1	0	0	0	0	0
ENSG00000199756	1	0	0	0	0	0
ENSG00000159023	1672	1537	1615	1704	1406	1331
ENSG00000225616	3	1	3	1	1	0
ENSG00000206704	0	0	0	0	0	0
ENSG00000277958	0	0	0	0	0	0
ENSG00000253304	996	922	1045	1197	933	811
ENSG00000225750	2	0	3	0	1	0
ENSG00000116350	7683	7353	8058	9329	7998	7083
ENSG00000277916	0	0	0	0	0	0
ENSG00000116353	628	569	619	760	632	532
ENSG00000237934	4	9	2	4	5	5
ENSG00000060656	2309	2067	2243	2788	2247	2141
ENSG00000230523	1	1	0	0	1	0
ENSG00000225011	0	0	0	0	0	0
ENSG00000228176	2	1	0	1	0	0
ENSG00000270927	0	0	0	0	0	0
ENSG00000233399	0	0	1	0	0	0
ENSG00000233372	0	0	0	0	0	0
ENSG00000231251	0	0	0	0	0	0
ENSG00000236335	0	0	0	0	0	0
ENSG00000231949	0	0	0	0	0	0
ENSG00000162510	16	17	19	28	18	12
ENSG00000186056	95	82	81	99	81	85
ENSG00000162511	34	29	29	39	32	26
ENSG00000264773	0	0	0	0	0	0
ENSG00000229607	0	0	0	0	0	0
ENSG00000223382	4	3	3	10	2	4
ENSG00000222784	0	0	0	0	0	0
ENSG00000235143	1	0	0	0	0	0
ENSG00000162512	3393	2977	3096	3810	3231	2871
ENSG00000266210	0	0	0	0	0	0
ENSG00000134644	5996	5695	6134	7335	6187	5733
ENSG00000237329	0	2	2	2	1	0
ENSG00000232768	5	0	1	2	2	3
ENSG00000215900	1	0	0	0	1	0
ENSG00000225142	0	0	0	0	0	0
ENSG00000084628	5	4	9	10	5	5
ENSG00000060688	2510	2251	2593	3095	2578	2312
ENSG00000229447	7	11	16	14	14	22
ENSG00000121766	1965	1860	1966	2390	1975	1699
ENSG00000229044	2	0	2	1	2	1
ENSG00000121769	65	56	65	93	64	69
ENSG00000168528	20809	18571	20895	25786	21177	18578
ENSG00000215899	0	0	0	0	2	0
ENSG00000206981	0	0	0	0	0	0
ENSG00000260386	0	0	2	1	2	3
ENSG00000265961	0	0	0	0	0	0
ENSG00000229167	45	43	42	84	54	47
ENSG00000142910	8994	8167	8862	10406	8778	7486
ENSG00000121764	5	2	0	4	5	3
ENSG00000162517	2189	2073	2337	2742	2389	1979
ENSG00000235790	72	67	58	77	80	63
ENSG00000264078	4	2	6	2	5	6
ENSG00000084636	5354	4909	5120	5979	5147	4579
ENSG00000121753	170	192	174	210	181	169
ENSG00000266580	1	0	0	0	0	0
ENSG00000254545	9	9	13	10	7	10
ENSG00000134668	798	719	758	953	776	708
ENSG00000203620	0	1	0	1	0	0
ENSG00000269967	2	10	7	18	10	1
ENSG00000184007	4231	4308	4808	4929	3880	3632
ENSG00000228634	10	6	11	3	4	4
ENSG00000121774	8554	7891	8953	10267	8319	7117
ENSG00000203325	6	6	4	5	9	9
ENSG00000121775	746	635	765	865	687	681
ENSG00000266203	0	0	0	0	0	0
ENSG00000276493	0	0	0	1	0	0
ENSG00000025800	5665	5122	5669	6867	5952	5382
ENSG00000250135	0	0	0	0	0	0
ENSG00000084652	4760	4217	4602	5443	4467	4063
ENSG00000160050	535	467	535	509	480	394
ENSG00000224066	6	10	8	12	10	9
ENSG00000160051	351	309	355	425	364	320
ENSG00000222046	16	10	9	9	12	3
ENSG00000160055	554	441	573	540	511	545
ENSG00000084623	8612	7903	9220	10978	9245	8254
ENSG00000220785	238	205	239	243	215	192
ENSG00000183615	63	84	58	65	63	64
ENSG00000182866	42	38	28	42	33	36
ENSG00000277617	0	0	0	0	0	0
ENSG00000252450	0	0	0	0	0	0
ENSG00000116478	7822	7510	8170	10136	8394	7484
ENSG00000175130	3379	3255	3602	4086	3362	2916
ENSG00000233775	1	1	1	3	0	3
ENSG00000162526	34	20	20	32	34	23
ENSG00000225828	93	88	105	114	116	113
ENSG00000160058	2928	2739	2819	3456	2895	2581
ENSG00000224333	1	0	0	0	0	0
ENSG00000270850	0	0	0	0	0	0
ENSG00000229259	1	0	0	0	0	0
ENSG00000263529	0	0	0	0	0	0
ENSG00000254553	2	0	1	0	0	0
ENSG00000273274	26	14	22	33	22	23
ENSG00000160062	487	465	499	535	475	431
ENSG00000176261	949	887	1018	1202	938	930
ENSG00000200591	0	4	0	0	2	3
ENSG00000162521	7862	7196	8237	9586	7898	7174
ENSG00000162520	204	224	199	210	199	148
ENSG00000224409	26	15	26	22	17	19
ENSG00000162522	11695	9951	11205	12919	10668	9933
ENSG00000134684	6598	6061	6811	7275	6262	5725
ENSG00000116497	1871	1686	1977	2269	1838	1866
ENSG00000160097	7	16	22	14	14	19
ENSG00000121905	15	13	8	19	16	13
ENSG00000121900	2084	1924	2221	2559	2204	1729
ENSG00000116514	1826	1687	1883	1982	1566	1594
ENSG00000278966	1	4	0	3	0	0
ENSG00000217644	2	1	3	0	1	5
ENSG00000239670	6	1	2	8	6	0
ENSG00000236065	6	1	3	2	4	0
ENSG00000004455	10365	9726	10542	12897	10719	9451
ENSG00000276645	0	0	2	2	1	0
ENSG00000142920	198	204	195	247	198	158
ENSG00000278997	22	2	10	30	12	19
ENSG00000116525	491	442	452	596	556	425
ENSG00000279179	27	24	36	31	55	37
ENSG00000160094	845	805	905	1119	954	850
ENSG00000270115	12	9	7	10	2	11
ENSG00000184389	26	16	23	28	35	18
ENSG00000225313	244	191	216	271	242	218
ENSG00000134686	3975	3464	3831	4558	3672	3472
ENSG00000222112	19	19	15	19	23	21
ENSG00000233246	16	11	30	30	12	16
ENSG00000234512	0	0	0	0	0	0
ENSG00000121903	258	207	232	293	246	206
ENSG00000235907	0	1	2	2	1	1
ENSG00000121904	0	2	2	2	2	2
ENSG00000227000	0	0	0	0	0	0
ENSG00000176256	0	0	0	0	0	0
ENSG00000231163	0	0	0	0	0	0
ENSG00000201148	0	0	0	0	0	0
ENSG00000142698	0	0	0	0	0	0
ENSG00000270241	0	0	0	0	0	0
ENSG00000207941	0	0	0	0	0	0
ENSG00000163866	1609	1496	1665	1866	1709	1361
ENSG00000189280	1607	1548	1718	2021	1569	1615
ENSG00000189433	559	479	510	514	446	432
ENSG00000255811	0	0	0	0	0	0
ENSG00000188910	5986	5480	6281	6900	5571	5069
ENSG00000187513	1	3	0	2	0	1
ENSG00000230163	36	41	28	33	34	32
ENSG00000116544	7	8	6	13	7	8
ENSG00000241014	137	113	134	137	134	108
ENSG00000271741	21	17	30	37	23	23
ENSG00000243749	306	264	297	380	274	216
ENSG00000163867	641	574	656	775	665	604
ENSG00000233940	0	0	0	0	0	0
ENSG00000197056	1448	1248	1428	1775	1407	1338
ENSG00000228348	3	0	0	0	0	0
ENSG00000116560	10435	9958	10452	13354	10876	9448
ENSG00000201868	0	0	0	0	0	0
ENSG00000146463	2566	2269	2573	3078	2444	2423
ENSG00000240374	0	0	0	0	0	0
ENSG00000201542	1	0	0	0	0	0
ENSG00000229994	7	9	8	7	14	6
ENSG00000227409	1	1	3	6	3	1
ENSG00000278702	0	0	0	0	0	0
ENSG00000142687	2281	1971	2347	2690	2177	2026
ENSG00000236274	0	0	0	0	0	0
ENSG00000020129	1314	1184	1307	1728	1319	1215
ENSG00000239636	6	3	3	5	2	7
ENSG00000116819	34	17	34	35	18	28
ENSG00000126067	6298	5998	6877	8144	6586	5745
ENSG00000142686	942	927	923	1114	1016	799
ENSG00000092853	2545	2431	2561	3009	2476	2069
ENSG00000232335	0	6	0	2	0	1
ENSG00000134698	1032	961	974	1114	1027	871
ENSG00000092847	2194	1887	2098	2484	2193	2026
ENSG00000271164	0	0	0	0	0	0
ENSG00000271914	0	0	0	0	0	0
ENSG00000126070	1397	1289	1405	1705	1289	1274
ENSG00000271554	13	5	2	7	3	0
ENSG00000232862	0	0	0	0	0	1
ENSG00000092850	0	0	0	1	1	3
ENSG00000116863	1158	1218	1254	1403	1184	973
ENSG00000171812	168	133	169	189	126	129
ENSG00000054116	2621	2492	2899	3263	2568	2322
ENSG00000116871	15859	14840	16494	17643	14370	12592
ENSG00000264592	0	0	0	1	0	0
ENSG00000054118	7767	7295	7834	9675	7828	7078
ENSG00000231849	0	0	0	0	2	0
ENSG00000214193	2633	2286	2284	2682	2188	2236
ENSG00000142694	790	789	688	797	655	615
ENSG00000116883	905	932	962	1005	994	843
ENSG00000196182	863	749	943	1010	883	762
ENSG00000181817	525	464	510	699	627	450
ENSG00000222821	0	0	0	0	0	0
ENSG00000116885	221	208	200	249	237	184
ENSG00000201448	0	1	1	1	1	0
ENSG00000116898	2758	2432	2865	3186	2704	2369
ENSG00000119535	1	1	0	0	0	0
ENSG00000230214	0	0	0	0	0	0
ENSG00000234481	0	0	0	0	0	0
ENSG00000163873	0	0	0	0	0	0
ENSG00000264698	0	0	0	0	0	0
ENSG00000207328	0	0	0	0	0	0
ENSG00000223944	0	0	0	0	0	0
ENSG00000252368	0	0	0	0	0	0
ENSG00000230451	0	0	0	0	0	0
ENSG00000233621	135	142	160	129	116	100
ENSG00000163874	1494	1231	1569	1328	1058	1080
ENSG00000163875	2201	2120	2313	2759	2199	1999
ENSG00000263675	12	6	12	13	6	11
ENSG00000163877	894	873	935	1094	914	809
ENSG00000232273	4	1	2	2	2	3
ENSG00000237749	0	0	2	1	0	0
ENSG00000163879	17	13	10	9	16	15
ENSG00000134697	3153	2728	3214	3947	3189	2915
ENSG00000169218	1	0	0	0	0	0
ENSG00000116922	828	787	900	1018	848	811
ENSG00000134690	3529	3376	3593	4517	3667	3445
ENSG00000183317	5	2	3	2	4	2
ENSG00000200421	0	0	0	0	0	0
ENSG00000214141	0	0	0	0	0	0
ENSG00000227416	0	0	0	0	0	0
ENSG00000185090	420	395	450	579	455	381
ENSG00000233728	0	0	0	0	0	0
ENSG00000196449	555	552	598	707	585	539
ENSG00000197982	1229	1235	1353	1403	1100	999
ENSG00000188786	1219	1168	1216	1443	1218	1222
ENSG00000235673	0	0	0	0	0	1
ENSG00000204084	519	509	581	648	591	404
ENSG00000230955	0	0	0	0	0	0
ENSG00000252448	1	1	0	0	1	1
ENSG00000222282	0	0	1	0	0	0
ENSG00000277168	0	0	0	0	0	0
ENSG00000183431	4722	4398	5063	5954	4888	4400
ENSG00000212541	4	6	9	15	10	12
ENSG00000183386	769	762	829	1042	756	698
ENSG00000183520	1756	1661	1841	2238	1904	1588
ENSG00000185668	15	19	9	18	14	10
ENSG00000224592	3	1	7	1	1	3
ENSG00000223589	0	0	0	0	0	0
ENSG00000265596	0	0	0	0	0	0
ENSG00000237290	0	0	1	0	1	0
ENSG00000275350	0	0	0	0	0	0
ENSG00000200796	0	0	0	0	0	0
ENSG00000238063	0	0	0	0	0	0
ENSG00000215895	1	4	4	2	1	0
ENSG00000116954	1170	1175	1248	1379	1149	1014
ENSG00000273637	0	1	0	0	1	0
ENSG00000228436	14	14	10	13	13	17
ENSG00000214114	1187	1076	1338	1455	1248	1094
ENSG00000274944	3	7	9	8	14	10
ENSG00000131233	2	6	1	3	0	3
ENSG00000158315	500	438	491	471	468	387
ENSG00000199963	0	0	0	0	0	0
ENSG00000207466	0	0	0	0	0	0
ENSG00000235549	0	0	0	0	0	0
ENSG00000174574	3578	3439	3769	4326	3439	3111
ENSG00000168653	4832	4412	5046	5638	4904	3896
ENSG00000127603	16425	14233	14446	17613	14256	14708
ENSG00000206654	0	1	1	2	0	3
ENSG00000222378	2	2	0	2	0	0
ENSG00000270040	0	0	0	2	2	0
ENSG00000226438	0	0	1	1	2	0
ENSG00000217897	2	2	0	1	2	0
ENSG00000183682	17	28	20	30	16	22
ENSG00000237624	27	26	19	36	36	30
ENSG00000182109	73	66	96	105	71	71
ENSG00000243970	29	17	21	22	31	22
ENSG00000090621	9030	8711	9517	11486	9217	7764
ENSG00000228060	20	17	24	24	26	33
ENSG00000201457	6	9	9	7	15	11
ENSG00000163909	2	1	0	1	1	4
ENSG00000225903	0	0	0	0	0	0
ENSG00000116981	3	4	1	5	3	0
ENSG00000116983	103	59	93	101	80	83
ENSG00000084072	2263	2057	2412	2897	2313	2092
ENSG00000225333	0	0	0	0	0	0
ENSG00000252413	0	0	0	0	0	0
ENSG00000116985	552	481	580	621	437	494
ENSG00000198754	51	46	49	60	50	47
ENSG00000261798	7	9	12	11	8	11
ENSG00000229213	0	0	1	0	0	0
ENSG00000043514	1187	1079	1229	1476	1217	1019
ENSG00000202222	0	0	0	2	1	2
ENSG00000116990	279	209	254	290	285	246
ENSG00000236546	0	1	1	1	0	0
ENSG00000207356	0	0	0	0	0	0
ENSG00000168389	895	921	912	1145	926	874
ENSG00000228477	36	41	42	48	50	53
ENSG00000131236	23693	22115	25334	28081	22939	21574
ENSG00000131238	5335	4949	5645	6674	5445	5142
ENSG00000226745	0	0	0	0	0	0
ENSG00000117000	1920	1728	1812	2133	1721	1716
ENSG00000207508	0	3	1	1	1	4
ENSG00000188800	0	2	1	2	0	0
ENSG00000259943	190	192	203	214	192	151
ENSG00000084073	2892	2757	3087	3793	3024	2887
ENSG00000231296	1	4	2	3	0	5
ENSG00000049089	79	66	75	76	62	82
ENSG00000227311	0	0	0	1	0	0
ENSG00000084070	1058	991	1029	1307	1107	991
ENSG00000213172	0	0	0	0	0	0
ENSG00000187801	273	257	285	378	252	228
ENSG00000260920	155	131	152	194	131	160
ENSG00000279667	1	2	8	1	6	3
ENSG00000187815	163	204	225	260	222	198
ENSG00000238287	34	35	26	28	28	27
ENSG00000164002	371	330	347	409	379	324
ENSG00000227278	2	0	1	1	0	0
ENSG00000238186	26	18	31	10	21	27
ENSG00000117010	154	147	157	219	149	142
ENSG00000236505	0	0	0	0	0	0
ENSG00000233910	0	0	0	0	0	0
ENSG00000117016	1213	1077	1159	1148	1000	995
ENSG00000237899	6	4	4	15	7	5
ENSG00000272145	51	42	60	71	63	65
ENSG00000066136	1518	1478	1649	1970	1570	1430
ENSG00000198974	0	0	0	0	0	0
ENSG00000207962	0	0	1	4	0	2
ENSG00000117013	9	19	26	20	16	16
ENSG00000264582	0	0	0	0	0	0
ENSG00000179862	2570	2405	2684	2961	2116	1370
ENSG00000229528	1	0	3	3	1	0
ENSG00000228940	0	0	0	0	1	0
ENSG00000233118	0	0	0	0	0	0
ENSG00000171793	3080	2853	3317	3882	3181	2899
ENSG00000281207	143	136	114	120	142	143
ENSG00000171790	71	41	53	75	57	49
ENSG00000010803	839	771	789	946	874	745
ENSG00000215893	0	1	1	5	1	3
ENSG00000235358	4	2	1	4	1	0
ENSG00000213987	0	0	0	0	0	0
ENSG00000204060	54	39	61	61	55	50
ENSG00000229901	1	5	3	1	1	1
ENSG00000252563	0	0	0	0	0	0
ENSG00000127129	15	5	18	9	15	5
ENSG00000127124	305	246	313	440	308	315
ENSG00000230881	1	2	0	0	0	0
ENSG00000230638	92	96	102	129	124	101
ENSG00000227538	1	0	0	0	0	0
ENSG00000228776	0	0	0	0	0	0
ENSG00000044012	0	0	0	0	0	0
ENSG00000197273	0	0	1	0	0	0
ENSG00000198815	2502	2446	2705	3058	2485	2335
ENSG00000227527	9	2	1	6	7	6
ENSG00000177181	5	1	0	2	0	1
ENSG00000235002	0	0	0	0	0	0
ENSG00000066185	13	7	10	15	13	12
ENSG00000127125	1626	1534	1722	2117	1719	1521
ENSG00000186409	37	39	42	38	34	31
ENSG00000230116	2	0	0	3	0	0
ENSG00000236876	0	0	0	0	1	0
ENSG00000200254	0	0	0	0	0	0
ENSG00000236180	0	0	0	0	0	0
ENSG00000171960	1497	1444	1672	1927	1669	1403
ENSG00000234917	5	4	3	15	5	7
ENSG00000065978	50191	47792	53821	64250	51019	42024
ENSG00000164007	9	4	7	6	6	1
ENSG00000117385	1670	1470	1666	1944	1580	1479
ENSG00000164008	48	64	65	71	65	60
ENSG00000283580	18	6	13	12	13	14
ENSG00000228452	30	42	43	58	55	33
ENSG00000274386	15	14	15	22	18	14
ENSG00000177868	410	406	458	514	442	387
ENSG00000164010	397	374	413	462	414	407
ENSG00000228192	117	95	114	141	104	101
ENSG00000164011	352	319	353	464	399	311
ENSG00000233708	0	0	2	0	0	0
ENSG00000237090	1	0	4	0	1	1
ENSG00000225099	0	0	1	0	0	0
ENSG00000117394	13435	12248	13383	15298	12624	11465
ENSG00000227533	89	72	71	107	69	93
ENSG00000207256	2	12	1	1	0	0
ENSG00000283136	0	0	0	1	0	0
ENSG00000277513	0	0	0	0	0	0
ENSG00000186973	31	26	43	40	42	35
ENSG00000117395	4258	4113	4457	5434	4649	3760
ENSG00000243710	40	35	31	42	27	36
ENSG00000199240	0	0	0	0	0	1
ENSG00000179178	323	264	297	365	314	295
ENSG00000253313	311	280	292	374	347	272
ENSG00000066056	1	0	5	4	3	2
ENSG00000117400	23	17	28	22	25	19
ENSG00000234694	125	144	120	137	155	129
ENSG00000117399	8105	7218	8604	10235	8204	7501
ENSG00000066322	4074	3949	4183	4930	4102	3708
ENSG00000159479	1468	1446	1669	1808	1470	1348
ENSG00000229431	55	61	39	56	34	47
ENSG00000198198	1964	1710	1805	2191	1834	1843
ENSG00000229372	7	6	6	8	5	5
ENSG00000274975	0	0	0	0	0	0
ENSG00000178922	1078	1047	1079	1213	952	881
ENSG00000229348	6	7	15	15	11	13
ENSG00000142949	28018	24691	26854	30855	25509	23778
ENSG00000066135	3765	3487	3743	4649	3757	3464
ENSG00000236200	73	66	77	106	74	75
ENSG00000126091	371	376	354	470	374	369
ENSG00000229444	1	2	5	5	3	1
ENSG00000283414	0	1	1	0	0	0
ENSG00000233674	2	0	6	10	5	5
ENSG00000283477	0	0	0	2	0	0
ENSG00000224751	1	0	1	0	1	0
ENSG00000117407	1567	1543	1633	1833	1532	1284
ENSG00000237950	22	24	29	34	20	23
ENSG00000117408	1831	1539	1737	2106	1738	1549
ENSG00000132768	965	846	945	1178	1021	855
ENSG00000117410	2157	2122	2361	2890	2335	2006
ENSG00000117411	2737	2491	2842	3250	2760	2544
ENSG00000159214	1018	935	1021	1018	792	735
ENSG00000196517	1003	897	918	971	792	798
ENSG00000230615	89	81	79	77	58	42
ENSG00000227163	5	2	0	0	0	1
ENSG00000271647	0	0	0	1	0	0
ENSG00000239560	0	0	0	0	0	0
ENSG00000171872	8	10	9	15	10	10
ENSG00000233514	1	0	0	2	2	0
ENSG00000283039	0	0	0	0	0	0
ENSG00000226804	0	0	0	0	0	0
ENSG00000200171	0	0	0	0	0	0
ENSG00000238037	0	0	0	1	0	0
ENSG00000227994	0	0	0	0	0	0
ENSG00000271329	0	0	0	1	1	1
ENSG00000178028	1644	1580	1670	2017	1709	1484
ENSG00000117419	1891	1739	2015	2530	2174	1811
ENSG00000233602	7	10	18	7	11	14
ENSG00000199385	0	0	0	0	0	0
ENSG00000187147	2709	2459	2824	3347	2478	2126
ENSG00000263381	0	0	0	0	0	0
ENSG00000126106	339	312	317	403	329	302
ENSG00000198520	26	13	32	32	22	25
ENSG00000199377	2	4	1	3	1	1
ENSG00000200169	3	5	4	5	3	4
ENSG00000142945	5180	4827	5322	6561	5455	5124
ENSG00000225721	33	31	25	39	33	19
ENSG00000142937	32985	30406	35457	40786	34167	28611
ENSG00000264294	0	0	0	0	0	0
ENSG00000200913	13	10	21	12	5	15
ENSG00000202031	4	4	5	2	1	0
ENSG00000281859	0	0	0	0	0	0
ENSG00000207421	0	0	0	0	0	0
ENSG00000234093	6	8	2	4	7	3
ENSG00000142959	14	15	20	13	11	8
ENSG00000173846	1340	1047	1238	1329	1082	938
ENSG00000188396	49	41	41	35	45	31
ENSG00000222009	485	431	490	443	422	415
ENSG00000117425	16	7	7	9	7	22
ENSG00000202444	0	0	0	0	0	0
ENSG00000226499	1	2	2	1	4	2
ENSG00000070785	996	904	1100	1228	995	902
ENSG00000253039	0	0	0	3	0	0
ENSG00000229815	0	0	0	2	0	0
ENSG00000232369	3	5	3	2	2	3
ENSG00000268949	4	4	1	2	2	2
ENSG00000126107	1714	1558	1722	2099	1741	1603
ENSG00000126088	2487	2316	2715	3148	2583	2290
ENSG00000162415	3	1	2	4	4	0
ENSG00000234315	0	0	0	0	0	0
ENSG00000281912	13	14	16	19	18	20
ENSG00000186603	416	389	400	527	487	374
ENSG00000132781	1186	1054	1086	1340	1154	918
ENSG00000132773	405	429	473	564	497	416
ENSG00000070759	315	284	339	374	323	287
ENSG00000236872	1	2	0	0	3	0
ENSG00000280670	86	75	76	124	59	79
ENSG00000132763	669	596	585	799	654	581
ENSG00000117450	16423	15392	18114	20601	17608	14934
ENSG00000234379	0	0	0	0	0	0
ENSG00000117448	1713	1735	1845	2219	1849	1597
ENSG00000281133	0	0	0	2	1	0
ENSG00000280836	1	0	0	1	6	1
ENSG00000132780	8505	8081	8635	10380	8763	7707
ENSG00000281112	0	0	0	0	0	0
ENSG00000281825	0	1	0	0	0	0
ENSG00000159588	76	74	74	111	86	84
ENSG00000159592	4858	4462	4877	5688	4680	4482
ENSG00000225447	20	19	12	33	33	19
ENSG00000234329	26	11	21	32	15	32
ENSG00000159596	1708	1543	1886	2240	1778	1674
ENSG00000197429	840	838	923	1038	872	807
ENSG00000230896	61	61	78	95	58	52
ENSG00000236111	0	0	0	0	1	0
ENSG00000086015	2828	2508	2750	3302	2791	2711
ENSG00000232467	2	0	0	0	1	0
ENSG00000117461	1009	963	1136	1454	1179	949
ENSG00000278139	0	0	0	0	0	0
ENSG00000226957	0	3	0	0	0	1
ENSG00000233114	0	0	0	1	0	2
ENSG00000227857	3	0	7	4	5	1
ENSG00000117472	4492	3971	4519	5604	4595	4277
ENSG00000250719	0	0	0	0	0	0
ENSG00000085998	2798	2502	2781	3388	2804	2518
ENSG00000171357	266	204	227	318	272	200
ENSG00000085999	1391	1308	1458	1694	1457	1430
ENSG00000132128	2830	2665	2920	3476	2921	2515
ENSG00000173660	7934	7711	8545	9592	8368	6931
ENSG00000117481	1248	1089	1214	1495	1332	1170
ENSG00000225779	0	1	2	1	1	1
ENSG00000117480	47	39	38	46	39	38
ENSG00000232022	13	8	6	10	9	7
ENSG00000224863	0	0	3	2	1	2
ENSG00000197587	4	3	5	5	2	0
ENSG00000282881	0	0	0	0	0	0
ENSG00000269956	30	26	20	19	30	43
ENSG00000162456	0	1	0	0	0	0
ENSG00000079277	1803	1693	1852	2104	1783	1677
ENSG00000142961	1190	1040	1184	1318	1046	1077
ENSG00000123472	1639	1551	1731	2021	1757	1424
ENSG00000233647	1	1	1	0	1	3
ENSG00000186118	2	5	2	9	9	2
ENSG00000228237	5	5	7	19	4	4
ENSG00000159658	3897	3483	3955	4967	3802	3631
ENSG00000236476	0	0	0	0	0	0
ENSG00000142973	21	13	9	21	26	18
ENSG00000154198	0	1	0	0	0	0
ENSG00000238145	0	0	0	0	0	0
ENSG00000187048	0	0	0	0	0	0
ENSG00000259832	0	0	0	0	0	0
ENSG00000261196	0	0	0	0	0	0
ENSG00000261593	0	0	0	0	0	0
ENSG00000261290	0	0	0	0	0	0
ENSG00000186377	16	18	9	16	7	9
ENSG00000186160	7	5	4	9	8	5
ENSG00000225154	0	1	0	1	0	1
ENSG00000225506	83	70	82	108	85	98
ENSG00000162365	1	4	1	2	1	3
ENSG00000225514	1	0	2	2	0	0
ENSG00000224805	27	20	34	39	26	26
ENSG00000162366	11	19	17	18	9	8
ENSG00000162367	0	0	1	0	1	0
ENSG00000226252	0	0	0	0	0	0
ENSG00000123473	2387	2169	2520	2989	2395	2423
ENSG00000162368	4827	4772	5102	5960	5054	4419
ENSG00000225762	5	5	5	5	8	7
ENSG00000186790	8	5	4	6	3	3
ENSG00000237424	151	143	159	172	150	152
ENSG00000186564	93	81	90	115	79	70
ENSG00000271355	0	0	0	0	0	0
ENSG00000229554	0	0	0	0	0	0
ENSG00000227883	0	0	0	0	0	0
ENSG00000227947	0	0	0	0	0	0
ENSG00000269113	0	0	0	0	0	0
ENSG00000223814	0	0	0	0	0	0
ENSG00000225028	0	0	0	0	0	0
ENSG00000226133	0	0	0	0	0	0
ENSG00000231413	0	0	0	0	0	0
ENSG00000237180	0	0	0	0	0	0
ENSG00000242267	0	0	0	0	0	0
ENSG00000279096	0	0	0	0	0	0
ENSG00000223720	0	0	0	0	0	0
ENSG00000117834	0	0	1	3	5	1
ENSG00000272491	0	0	2	0	2	0
ENSG00000279214	0	0	0	0	0	0
ENSG00000132122	125	122	124	154	148	142
ENSG00000224986	0	0	0	0	0	1
ENSG00000206700	0	0	0	0	0	0
ENSG00000235105	0	2	4	3	1	1
ENSG00000223175	0	0	0	0	0	0
ENSG00000232514	0	0	0	0	0	0
ENSG00000186094	0	0	0	0	0	0
ENSG00000162373	0	0	0	0	0	0
ENSG00000229846	0	0	0	0	0	0
ENSG00000230114	0	0	0	0	0	0
ENSG00000225623	0	0	0	0	0	0
ENSG00000237478	0	0	0	0	0	0
ENSG00000215887	0	0	0	0	0	0
ENSG00000279324	0	0	0	0	0	0
ENSG00000233595	0	0	0	0	0	0
ENSG00000162374	0	0	0	0	0	0
ENSG00000230828	0	0	0	0	0	0
ENSG00000237337	0	0	0	0	0	0
ENSG00000233407	0	0	0	0	0	0
ENSG00000234080	0	1	0	0	0	0
ENSG00000229316	0	0	0	0	0	0
ENSG00000225671	0	0	0	0	0	0
ENSG00000142700	1	0	1	0	0	0
ENSG00000185104	1932	1794	2082	2361	1831	1788
ENSG00000225767	2	1	1	1	1	5
ENSG00000207194	1	0	0	0	0	0
ENSG00000230585	3	0	2	6	2	3
ENSG00000237130	1	0	1	0	1	1
ENSG00000123080	435	324	392	512	408	301
ENSG00000265538	0	0	0	0	0	0
ENSG00000275816	0	0	0	0	0	0
ENSG00000204006	0	0	0	0	0	0
ENSG00000200262	0	0	0	0	0	0
ENSG00000213478	0	0	0	0	1	0
ENSG00000203356	2	3	1	0	3	2
ENSG00000123091	3028	2788	3267	3668	3100	2864
ENSG00000233406	4	7	4	3	5	4
ENSG00000236434	4	2	3	1	1	4
ENSG00000085831	89	74	91	80	68	87
ENSG00000261664	0	0	1	0	2	0
ENSG00000085832	2172	1837	2123	2421	2025	1934
ENSG00000232027	5	5	8	4	6	4
ENSG00000206595	0	0	2	0	0	0
ENSG00000238140	1	2	0	0	3	0
ENSG00000227070	7	7	17	17	6	8
ENSG00000252032	0	0	0	0	0	0
ENSG00000227742	1	0	5	4	2	1
ENSG00000117859	4885	4512	5039	5829	4914	4677
ENSG00000236973	0	1	0	1	0	0
ENSG00000232846	1	2	2	0	0	0
ENSG00000212624	0	0	0	0	0	0
ENSG00000078618	9494	8722	9487	11548	9291	8701
ENSG00000266993	19	34	33	40	33	32
ENSG00000272175	3	4	1	0	1	0
ENSG00000230604	1	1	0	0	2	0
ENSG00000169213	4755	4433	5089	5494	4460	4500
ENSG00000200839	0	4	1	0	2	0
ENSG00000229032	0	0	0	0	0	0
ENSG00000264613	0	0	0	0	0	0
ENSG00000117862	2965	2560	3047	3474	2849	2489
ENSG00000198841	336	337	366	464	386	333
ENSG00000223390	3	0	4	8	2	4
ENSG00000228369	7	4	8	5	0	12
ENSG00000134717	2224	2244	2442	2896	2393	2265
ENSG00000157077	2076	1822	2077	2207	1767	1756
ENSG00000241745	0	1	0	1	0	1
ENSG00000228407	3	4	6	15	6	11
ENSG00000223429	0	1	1	2	2	1
ENSG00000224255	3	2	4	14	4	1
ENSG00000236004	0	2	1	0	0	0
ENSG00000237663	1	1	0	0	0	1
ENSG00000213735	1	0	2	1	1	0
ENSG00000154222	1899	1737	1891	2023	1832	1674
ENSG00000272100	11	7	5	5	2	6
ENSG00000224680	3	6	10	1	6	10
ENSG00000085840	1124	1050	1206	1390	1138	1073
ENSG00000134748	1898	1760	2011	2513	1954	1763
ENSG00000134744	2841	2513	2761	3439	2865	2695
ENSG00000272371	0	0	0	3	2	1
ENSG00000236290	0	0	1	0	0	1
ENSG00000116157	10	4	8	11	3	3
ENSG00000182183	44	51	46	60	49	53
ENSG00000162377	1725	1672	1853	2367	1755	1665
ENSG00000233664	0	0	0	0	0	0
ENSG00000239640	0	0	0	0	0	0
ENSG00000162378	1671	1440	1645	2018	1628	1454
ENSG00000252018	0	0	0	0	0	0
ENSG00000228929	5	8	12	8	8	6
ENSG00000206627	0	2	0	1	2	2
ENSG00000203995	518	503	571	722	589	572
ENSG00000242391	11	7	7	7	8	5
ENSG00000121310	2078	1920	1994	2360	2217	1996
ENSG00000230953	50	35	38	49	36	55
ENSG00000231866	0	0	0	1	0	0
ENSG00000116171	3196	3007	3324	3874	3235	2895
ENSG00000264834	1	0	0	0	0	0
ENSG00000266188	0	0	0	0	0	0
ENSG00000265815	0	0	0	0	0	0
ENSG00000237279	0	0	0	1	0	0
ENSG00000236360	5	0	1	5	4	3
ENSG00000226147	0	0	1	0	1	2
ENSG00000279054	0	0	0	0	0	0
ENSG00000174348	0	0	0	0	1	0
ENSG00000232993	0	0	0	0	0	0
ENSG00000227644	0	0	0	0	0	0
ENSG00000162383	0	0	0	0	0	0
ENSG00000235563	0	0	0	0	0	0
ENSG00000277397	0	0	0	0	0	0
ENSG00000157184	898	842	913	1101	975	844
ENSG00000236723	9	8	10	11	8	10
ENSG00000162384	1033	919	1018	1220	1041	910
ENSG00000259818	7	0	1	9	3	3
ENSG00000162385	2208	2159	2341	2814	2352	1859
ENSG00000226754	27	15	28	37	30	24
ENSG00000157193	1831	1575	1729	2179	1795	1759
ENSG00000234578	0	3	1	3	2	3
ENSG00000228838	1	5	1	4	2	6
ENSG00000225030	3	6	2	3	3	4
ENSG00000232762	5	8	7	5	6	11
ENSG00000225675	7	9	6	9	3	9
ENSG00000226938	0	0	0	0	0	0
ENSG00000230138	0	0	0	0	0	0
ENSG00000236253	0	0	0	0	0	1
ENSG00000143006	2	3	2	2	3	5
ENSG00000174332	0	1	3	0	0	1
ENSG00000239007	0	0	0	0	0	0
ENSG00000058804	2640	2501	2870	3457	2842	2563
ENSG00000201003	0	2	1	4	3	2
ENSG00000229687	0	0	0	0	0	0
ENSG00000058799	900	814	927	1146	890	799
ENSG00000211452	5	17	14	21	19	9
ENSG00000081870	1429	1314	1513	1736	1369	1231
ENSG00000116212	2999	2610	3173	3515	2896	2682
ENSG00000219102	10	7	13	6	8	1
ENSG00000203985	0	0	0	3	1	0
ENSG00000116209	4291	4182	4699	5302	4331	4162
ENSG00000280378	11	12	5	11	7	6
ENSG00000116205	808	762	840	992	862	747
ENSG00000225183	0	0	1	0	0	0
ENSG00000279049	0	0	0	0	0	0
ENSG00000256407	1	1	0	0	0	1
ENSG00000157211	0	0	0	0	0	0
ENSG00000280425	1	0	1	0	0	0
ENSG00000215883	189	192	204	262	196	185
ENSG00000116221	3699	3327	3896	4662	3819	3394
ENSG00000157216	1505	1444	1543	1772	1408	1337
ENSG00000198711	28	30	21	32	27	23
ENSG00000225632	0	0	1	0	1	1
ENSG00000232245	0	0	0	0	0	0
ENSG00000235741	10	10	4	6	11	8
ENSG00000237173	0	0	0	0	0	0
ENSG00000227453	0	0	0	0	0	0
ENSG00000162390	580	529	570	726	578	636
ENSG00000162391	36	36	31	43	41	34
ENSG00000230728	0	2	4	1	2	1
ENSG00000184313	1	5	1	2	2	1
ENSG00000271723	0	0	0	0	0	0
ENSG00000243725	399	354	438	542	467	342
ENSG00000162396	316	252	286	338	304	263
ENSG00000006555	766	686	742	877	724	676
ENSG00000237453	7	2	0	1	1	1
ENSG00000162398	7	10	7	6	4	8
ENSG00000116133	26281	23342	26234	31291	25797	23777
ENSG00000242396	57	66	46	61	71	44
ENSG00000233203	24	12	18	25	22	19
ENSG00000143001	77	64	81	82	83	46
ENSG00000233271	0	0	0	0	0	0
ENSG00000162399	0	0	2	0	1	0
ENSG00000169174	14611	12840	13960	16820	14019	12542
ENSG00000162402	5160	4643	5026	6070	4783	4751
ENSG00000231090	0	0	1	1	0	0
ENSG00000231095	0	0	0	0	0	0
ENSG00000265822	0	0	0	0	0	0
ENSG00000231900	0	0	0	0	0	0
ENSG00000232198	0	0	0	0	0	0
ENSG00000199831	0	0	0	0	0	0
ENSG00000252162	0	0	0	0	0	0
ENSG00000272051	0	0	0	0	0	0
ENSG00000234810	0	0	0	0	0	0
ENSG00000230250	0	0	0	0	0	0
ENSG00000227104	0	0	0	0	0	0
ENSG00000233079	0	0	0	0	0	0
ENSG00000235612	0	0	0	0	0	0
ENSG00000229871	0	0	0	0	0	0
ENSG00000260971	0	0	0	0	0	0
ENSG00000223956	0	0	0	1	0	0
ENSG00000162407	169	165	151	154	178	146
ENSG00000236776	0	0	0	0	0	0
ENSG00000224980	0	0	0	0	0	0
ENSG00000225475	0	2	1	1	0	0
ENSG00000162409	39	51	47	51	32	24
ENSG00000187889	1	1	0	2	2	6
ENSG00000229913	0	0	0	0	0	0
ENSG00000157131	0	0	0	0	0	0
ENSG00000021852	0	0	0	0	0	0
ENSG00000236341	0	0	0	0	0	0
ENSG00000173406	0	1	3	0	1	0
ENSG00000227935	0	0	0	0	0	0
ENSG00000236888	0	0	0	0	0	0
ENSG00000226759	0	0	0	0	1	1
ENSG00000229887	1	1	0	0	1	1
ENSG00000223416	2	2	1	0	0	2
ENSG00000235038	0	0	0	0	0	0
ENSG00000230546	0	0	0	0	0	0
ENSG00000233216	0	0	0	0	0	0
ENSG00000162600	612	540	622	774	647	610
ENSG00000270209	0	0	0	0	0	0
ENSG00000264128	0	0	0	0	0	0
ENSG00000184292	12733	11589	13105	15289	12297	10920
ENSG00000185839	8	14	10	15	5	9
ENSG00000162601	1843	1665	1792	2299	1856	1875
ENSG00000283445	48	50	60	47	57	54
ENSG00000177606	2302	2219	2489	2540	2295	1848
ENSG00000234807	25	16	16	19	20	12
ENSG00000272226	2	2	9	5	6	1
ENSG00000231740	0	0	1	1	0	0
ENSG00000232453	20	22	37	30	22	20
ENSG00000237352	9	7	4	16	12	6
ENSG00000228121	1	0	1	0	0	0
ENSG00000241042	0	0	0	0	0	0
ENSG00000235215	2	0	0	0	2	1
ENSG00000224609	2	1	1	1	0	0
ENSG00000270457	0	0	8	0	0	0
ENSG00000172456	390	367	404	440	388	319
ENSG00000266150	0	0	0	0	0	1
ENSG00000226883	0	1	2	2	1	5
ENSG00000134709	2254	2257	2449	2885	2402	2227
ENSG00000134716	102	99	101	145	117	97
ENSG00000265535	0	0	0	0	0	0
ENSG00000162598	0	0	0	0	0	0
ENSG00000229332	0	0	0	0	0	0
ENSG00000238242	0	0	0	0	0	0
ENSG00000226476	262	236	240	324	249	252
ENSG00000231252	0	0	0	0	0	0
ENSG00000162599	1301	1175	1237	1631	1376	1211
ENSG00000237928	0	0	0	0	0	0
ENSG00000270742	4	0	2	9	5	1
ENSG00000237853	2	2	4	6	1	1
ENSG00000223920	0	0	1	1	0	2
ENSG00000162604	845	861	923	1088	908	848
ENSG00000271200	5	3	5	4	2	2
ENSG00000132849	4049	3647	3975	4516	3689	3579
ENSG00000200575	0	0	0	0	0	0
ENSG00000212360	0	0	0	0	3	0
ENSG00000236646	1	1	0	0	0	1
ENSG00000242860	1	0	0	2	1	1
ENSG00000263908	2	0	0	0	0	0
ENSG00000283690	0	0	0	0	0	0
ENSG00000234204	0	0	0	0	0	0
ENSG00000234088	0	0	0	0	0	0
ENSG00000240563	114	89	102	132	81	73
ENSG00000237227	0	0	0	1	0	0
ENSG00000200174	0	0	0	0	0	0
ENSG00000132854	92	84	106	110	76	67
ENSG00000201153	0	0	0	0	0	0
ENSG00000162607	4032	3883	4466	4937	4164	3831
ENSG00000116641	2535	2277	2581	3000	2395	2335
ENSG00000270549	0	0	0	0	0	0
ENSG00000132855	2	3	2	8	6	7
ENSG00000278967	5	2	5	2	6	4
ENSG00000213703	0	0	0	0	0	0
ENSG00000235545	5	9	9	4	15	7
ENSG00000125703	603	583	681	900	641	575
ENSG00000234318	0	1	0	0	0	0
ENSG00000237163	0	0	0	0	0	0
ENSG00000229537	0	0	0	0	0	0
ENSG00000227485	0	0	0	0	0	0
ENSG00000229225	0	0	0	0	0	0
ENSG00000203605	0	0	0	0	0	0
ENSG00000224209	1	6	2	4	2	1
ENSG00000252259	0	0	0	0	0	0
ENSG00000228734	0	0	0	2	0	0
ENSG00000223683	0	0	0	1	0	0
ENSG00000230798	0	0	0	0	1	0
ENSG00000187140	0	0	0	0	0	0
ENSG00000275836	0	0	0	0	0	0
ENSG00000252784	0	0	0	0	0	0
ENSG00000236674	0	0	0	0	0	0
ENSG00000088035	635	595	655	805	632	584
ENSG00000142856	1545	1464	1741	1905	1695	1515
ENSG00000203965	377	368	365	445	376	386
ENSG00000264271	0	0	0	1	0	0
ENSG00000251720	0	3	1	2	3	0
ENSG00000116652	35	19	34	43	35	34
ENSG00000276884	0	0	0	0	0	0
ENSG00000278287	0	0	0	0	0	0
ENSG00000277565	0	0	0	0	0	0
ENSG00000275823	0	0	0	0	0	0
ENSG00000277689	0	0	0	0	0	0
ENSG00000274199	0	0	0	0	0	0
ENSG00000079739	4762	4407	4841	5625	4560	4150
ENSG00000244256	5	11	12	8	10	11
ENSG00000185483	62	41	69	68	45	42
ENSG00000177452	0	0	0	0	0	0
ENSG00000228056	0	0	0	0	0	0
ENSG00000207190	0	0	0	0	0	0
ENSG00000200508	0	0	0	0	0	0
ENSG00000223949	0	2	0	0	1	0
ENSG00000177414	0	0	2	0	0	0
ENSG00000238653	0	0	0	0	0	0
ENSG00000158966	301	274	367	393	321	318
ENSG00000264470	0	0	0	0	0	0
ENSG00000162437	1061	996	1132	1323	1077	1027
ENSG00000162434	4710	4335	4959	5296	4393	4127
ENSG00000234784	0	0	1	0	0	0
ENSG00000233877	0	0	0	0	0	0
ENSG00000226891	2	8	0	1	1	1
ENSG00000185031	0	0	0	0	0	1
ENSG00000272506	0	0	0	2	1	1
ENSG00000212257	0	0	0	0	0	1
ENSG00000265996	4	0	0	1	0	4
ENSG00000199135	0	0	0	0	0	0
ENSG00000231485	1	0	0	1	0	0
ENSG00000235804	0	0	0	0	0	0
ENSG00000234496	0	0	0	0	0	0
ENSG00000162433	4060	3794	4154	5115	4391	3894
ENSG00000231622	0	0	0	0	0	0
ENSG00000116675	249	241	254	303	236	223
ENSG00000229294	0	0	0	0	0	0
ENSG00000234144	0	0	2	0	0	0
ENSG00000222624	0	0	0	0	0	0
ENSG00000213625	1881	1792	2031	2399	1873	1774
ENSG00000116678	291	324	299	355	265	306
ENSG00000237852	1	1	2	0	1	2
ENSG00000224570	0	1	0	0	1	0
ENSG00000239319	0	0	0	0	0	0
ENSG00000184588	1	0	0	0	0	1
ENSG00000227466	0	0	0	0	0	0
ENSG00000223152	0	0	0	0	0	0
ENSG00000118473	1	0	0	1	0	3
ENSG00000264720	0	0	0	0	0	0
ENSG00000248458	0	0	0	0	0	0
ENSG00000152760	0	0	0	1	0	0
ENSG00000172410	0	0	0	0	0	0
ENSG00000152763	93	99	103	107	91	71
ENSG00000231080	0	0	0	0	0	0
ENSG00000198160	2512	2345	2703	3052	2491	2434
ENSG00000116704	1200	1031	1226	1429	1258	1070
ENSG00000203963	2	0	0	1	0	5
ENSG00000252433	0	0	0	0	0	0
ENSG00000275678	0	1	1	1	0	0
ENSG00000162594	1	0	0	1	2	3
ENSG00000253074	0	0	0	0	0	0
ENSG00000252116	0	0	0	0	0	0
ENSG00000228523	0	0	0	0	0	0
ENSG00000081985	1259	1099	1242	1561	1318	1218
ENSG00000142864	21850	20405	22792	28173	23107	20235
ENSG00000223263	2	5	3	6	1	0
ENSG00000235200	0	0	0	0	0	0
ENSG00000207504	0	0	0	0	0	0
ENSG00000238139	0	0	0	0	0	0
ENSG00000242482	0	0	0	0	0	0
ENSG00000232048	0	0	0	0	0	0
ENSG00000116717	3504	3215	3548	3876	3385	2738
ENSG00000172380	8161	7720	8543	10036	7912	7479
ENSG00000238778	0	2	1	0	1	0
ENSG00000232284	43	38	37	43	34	39
ENSG00000235055	0	0	4	0	0	1
ENSG00000162595	3	2	3	9	1	1
ENSG00000228431	0	0	2	0	0	0
ENSG00000116729	3826	3569	3778	4636	3967	3667
ENSG00000234383	19	11	18	16	14	10
ENSG00000221203	0	0	0	7	0	1
ENSG00000229133	0	2	1	0	0	0
ENSG00000225242	0	0	0	0	0	0
ENSG00000237622	1	0	0	0	0	0
ENSG00000229440	0	0	0	0	0	0
ENSG00000116745	0	0	0	0	0	0
ENSG00000024526	3395	3313	3576	4483	3566	3349
ENSG00000233589	71	38	62	96	76	72
ENSG00000234264	9	11	17	17	12	14
ENSG00000225167	0	0	0	0	0	0
ENSG00000223883	0	0	0	0	0	0
ENSG00000235446	0	0	1	0	0	0
ENSG00000229639	0	0	0	0	0	0
ENSG00000033122	69	42	54	71	73	82
ENSG00000270615	0	0	0	0	0	0
ENSG00000240692	0	0	0	0	0	0
ENSG00000229359	0	0	0	0	0	0
ENSG00000237919	0	0	0	0	0	0
ENSG00000066557	1323	1255	1350	1655	1304	1302
ENSG00000244389	1	0	0	0	0	0
ENSG00000116754	8322	7989	8477	10489	8595	7893
ENSG00000228988	1	0	1	0	0	0
ENSG00000118454	930	893	975	1097	979	923
ENSG00000197568	302	297	281	385	288	294
ENSG00000226088	5	16	20	7	6	10
ENSG00000279230	1	4	2	6	7	0
ENSG00000116761	398	365	424	428	380	366
ENSG00000278636	0	0	2	0	0	0
ENSG00000271992	5	3	3	3	2	5
ENSG00000233020	0	0	0	0	0	0
ENSG00000237033	0	0	0	0	0	0
ENSG00000229051	0	0	0	0	0	0
ENSG00000226208	0	0	0	0	0	0
ENSG00000050628	1	0	0	0	0	2
ENSG00000235782	0	0	0	0	0	0
ENSG00000269933	0	0	0	0	0	0
ENSG00000235079	9	0	7	10	2	9
ENSG00000132485	4340	4355	4626	5696	4555	4231
ENSG00000207721	27	33	22	21	27	25
ENSG00000229956	18	11	15	15	10	14
ENSG00000226324	0	0	0	0	0	0
ENSG00000172260	9	6	6	12	4	8
ENSG00000231985	0	0	0	0	0	0
ENSG00000271618	0	0	0	0	0	0
ENSG00000228853	0	0	0	0	0	0
ENSG00000233994	4	2	2	2	4	0
ENSG00000227207	0	0	0	0	0	0
ENSG00000212366	0	0	0	0	0	0
ENSG00000225087	0	0	1	1	0	0
ENSG00000227016	0	0	0	0	0	0
ENSG00000280317	0	0	0	0	0	0
ENSG00000229636	0	0	0	0	0	0
ENSG00000251825	0	0	0	0	0	0
ENSG00000233973	0	0	0	0	0	0
ENSG00000223479	0	0	0	0	0	0
ENSG00000200601	0	0	0	0	0	0
ENSG00000252005	0	0	0	0	0	0
ENSG00000162620	101	110	137	167	116	106
ENSG00000254685	606	565	688	874	700	595
ENSG00000259030	14	28	8	13	23	16
ENSG00000116783	1	1	0	2	1	1
ENSG00000237324	1	0	2	0	1	0
ENSG00000233894	0	0	0	0	0	0
ENSG00000162621	0	0	0	0	0	0
ENSG00000178965	4	3	0	2	3	2
ENSG00000234497	0	0	0	0	0	0
ENSG00000272864	6	0	3	0	1	0
ENSG00000116791	2283	2070	2612	2945	2547	2277
ENSG00000162623	1222	1202	1272	1485	1324	1152
ENSG00000229943	0	0	0	0	0	0
ENSG00000261213	0	0	0	0	0	0
ENSG00000224127	0	0	0	0	0	0
ENSG00000162624	0	0	0	0	0	0
ENSG00000224149	0	0	0	0	0	0
ENSG00000206999	0	0	0	0	0	0
ENSG00000137968	23	31	28	59	25	23
ENSG00000224493	0	0	0	0	0	0
ENSG00000252338	0	0	0	0	0	0
ENSG00000213579	0	0	0	0	0	0
ENSG00000230863	0	0	0	0	0	0
ENSG00000178193	0	1	0	0	4	0
ENSG00000117054	1511	1366	1616	1850	1477	1424
ENSG00000181227	12	12	16	26	20	12
ENSG00000137955	2597	2467	2828	3425	2838	2637
ENSG00000206620	0	0	0	0	0	0
ENSG00000207241	0	0	0	0	0	0
ENSG00000201487	0	0	0	0	0	0
ENSG00000057468	3	6	4	10	7	11
ENSG00000154007	0	0	0	0	0	0
ENSG00000225605	0	0	0	0	0	0
ENSG00000230027	0	0	0	0	0	0
ENSG00000184005	3	5	7	2	8	3
ENSG00000223905	0	0	0	0	0	0
ENSG00000272855	0	0	0	0	0	0
ENSG00000226415	60	57	61	75	54	62
ENSG00000199921	0	0	0	0	0	0
ENSG00000237552	0	0	0	0	0	0
ENSG00000117069	163	141	166	182	140	125
ENSG00000276081	0	0	0	0	0	0
ENSG00000230498	2	5	5	6	2	7
ENSG00000142892	1416	1276	1474	1816	1404	1369
ENSG00000226084	77	74	98	73	99	96
ENSG00000228187	0	0	0	1	0	0
ENSG00000154027	18	11	20	24	22	21
ENSG00000233099	0	0	0	0	0	0
ENSG00000251767	0	0	0	0	0	0
ENSG00000036549	2103	1843	2151	2644	2107	1973
ENSG00000251785	0	0	3	0	0	0
ENSG00000243437	0	0	0	1	0	0
ENSG00000077254	2198	2152	2417	2724	2287	2162
ENSG00000232672	0	0	0	0	0	0
ENSG00000180488	1065	922	1020	1250	971	909
ENSG00000222849	8	7	8	4	2	3
ENSG00000219201	28	28	29	44	28	25
ENSG00000235613	0	3	6	2	2	3
ENSG00000232015	0	0	0	0	0	0
ENSG00000235927	3	13	5	23	7	7
ENSG00000162614	100	95	121	141	110	109
ENSG00000162613	7289	6672	7398	9110	7734	6860
ENSG00000162616	1448	1468	1470	1892	1565	1385
ENSG00000137960	112	83	115	136	129	115
ENSG00000273338	15	15	10	31	14	13
ENSG00000213561	0	0	1	4	1	0
ENSG00000251958	0	0	0	0	0	0
ENSG00000213560	0	0	0	0	0	0
ENSG00000202263	0	0	0	0	0	0
ENSG00000233333	0	0	0	0	2	1
ENSG00000237413	0	0	0	0	0	1
ENSG00000122420	2	1	2	2	1	2
ENSG00000227556	0	0	0	0	0	0
ENSG00000212308	0	0	0	0	0	0
ENSG00000137959	215	181	229	398	203	238
ENSG00000137965	937	808	933	1255	885	891
ENSG00000238015	0	0	0	0	0	0
ENSG00000235400	0	1	0	0	0	0
ENSG00000162618	0	0	0	2	0	0
ENSG00000230787	1	2	0	0	0	0
ENSG00000235011	0	0	0	0	0	0
ENSG00000282898	0	0	0	0	0	0
ENSG00000232676	0	0	0	0	0	0
ENSG00000235756	0	0	0	0	0	0
ENSG00000260322	0	0	2	0	0	0
ENSG00000277670	0	0	0	0	0	0
ENSG00000236407	0	0	0	0	0	0
ENSG00000225598	0	0	0	0	0	1
ENSG00000213559	1	0	0	0	0	0
ENSG00000227062	0	0	0	0	0	0
ENSG00000234108	0	0	0	0	0	0
ENSG00000224326	0	0	0	0	0	0
ENSG00000234184	0	0	0	0	0	0
ENSG00000227937	0	0	0	0	0	0
ENSG00000229752	0	0	0	0	0	0
ENSG00000235089	0	0	0	0	0	0
ENSG00000223026	0	0	0	0	0	0
ENSG00000117114	50	55	53	69	62	54
ENSG00000224494	0	0	0	0	0	0
ENSG00000227288	0	0	2	2	0	1
ENSG00000227960	0	0	0	0	0	0
ENSG00000234953	0	0	0	0	0	0
[truncated: 56,144 more rows]

## Sheet: Supplementary Data 2
Gene	Ect-Sup-ctrl-MM-3	Ect-Sup-ctrl-MM-2	Ect-Sup-ctrl-MM-1	Ect-Sup-MM-3	Ect-Sup-MM-2	Ect-Sup-MM-1
ENSG00000223972	0	0	0	0	0	1
ENSG00000227232	137	104	135	125	123	124
ENSG00000278267	7	7	21	13	8	20
ENSG00000243485	0	0	2	1	1	1
ENSG00000237613	0	0	0	0	0	0
ENSG00000268020	0	0	0	0	0	0
ENSG00000240361	0	0	0	0	0	0
ENSG00000186092	0	0	0	0	0	0
ENSG00000238009	7	2	9	8	10	13
ENSG00000239945	0	0	0	0	0	0
ENSG00000233750	39	23	36	44	37	28
ENSG00000268903	109	108	133	136	128	137
ENSG00000269981	139	170	233	232	209	250
ENSG00000239906	0	2	0	2	4	2
ENSG00000241860	13	15	33	17	12	17
ENSG00000222623	1	0	2	0	6	4
ENSG00000241599	0	0	0	0	0	0
ENSG00000279928	1	0	1	3	2	0
ENSG00000279457	213	244	239	256	258	256
ENSG00000273874	0	0	2	0	0	0
ENSG00000228463	9	4	19	24	18	11
ENSG00000241670	0	0	0	0	0	0
ENSG00000236679	1	0	1	1	0	1
ENSG00000236743	0	0	0	1	0	0
ENSG00000236601	0	1	0	0	1	0
ENSG00000237094	19	14	25	22	25	27
ENSG00000269732	0	0	0	0	0	0
ENSG00000278566	0	0	0	0	0	0
ENSG00000224813	0	0	0	0	0	0
ENSG00000233653	0	0	0	0	0	0
ENSG00000250575	1	1	1	1	1	1
ENSG00000278757	0	0	0	0	1	0
ENSG00000230021	0	0	3	0	3	2
ENSG00000235146	0	0	0	0	0	0
ENSG00000225972	6	6	5	7	7	9
ENSG00000225630	1469	1698	2244	1710	1742	1680
ENSG00000237973	598	601	650	615	528	517
ENSG00000278791	0	0	0	0	0	0
ENSG00000229344	8	12	12	12	20	17
ENSG00000240409	12	10	9	8	9	4
ENSG00000248527	12465	13751	23898	16392	18046	15859
ENSG00000198744	14	12	12	15	14	11
ENSG00000268663	0	0	0	0	0	0
ENSG00000273547	0	0	0	0	0	0
ENSG00000283574	0	0	1	0	0	0
ENSG00000229376	2	6	3	4	3	5
ENSG00000228327	199	221	257	302	217	273
ENSG00000223181	0	1	1	0	0	0
ENSG00000229905	0	0	0	2	0	2
ENSG00000237491	19	35	39	37	27	39
ENSG00000230092	14	17	16	13	9	21
ENSG00000177757	10	18	13	12	11	14
ENSG00000228794	340	311	405	369	385	329
ENSG00000225880	28	29	40	18	24	30
ENSG00000230368	0	1	0	0	0	0
ENSG00000234711	0	0	0	0	0	0
ENSG00000283040	0	0	0	0	0	0
ENSG00000272438	6	8	10	9	6	9
ENSG00000230699	11	15	22	16	16	12
ENSG00000241180	1	1	0	0	1	0
ENSG00000223764	5	3	6	10	9	3
ENSG00000187634	24	22	32	39	31	27
ENSG00000188976	5487	5486	7026	5285	5373	5544
ENSG00000187961	630	627	769	705	739	722
ENSG00000187583	472	458	681	560	618	596
ENSG00000187642	285	262	250	291	290	266
ENSG00000272512	24	20	34	34	25	14
ENSG00000188290	672	731	907	525	713	795
ENSG00000187608	568	574	884	747	692	785
ENSG00000231702	0	0	1	0	0	0
ENSG00000224969	9	4	9	2	4	5
ENSG00000188157	20587	21913	27831	26370	26877	27179
ENSG00000242590	0	0	0	0	0	0
ENSG00000217801	261	299	376	399	409	391
ENSG00000273443	92	109	105	159	130	156
ENSG00000237330	67	52	95	77	87	96
ENSG00000131591	526	510	751	642	639	583
ENSG00000223823	0	0	0	0	0	0
ENSG00000207730	2	4	12	12	6	12
ENSG00000207607	8	17	8	20	14	15
ENSG00000198976	14	13	11	17	14	16
ENSG00000272141	34	41	52	90	72	63
ENSG00000205231	5	3	8	4	7	6
ENSG00000162571	17	17	11	22	18	13
ENSG00000186891	64	95	86	48	91	65
ENSG00000186827	0	0	0	2	2	3
ENSG00000078808	4775	4595	6170	4703	5386	5283
ENSG00000176022	539	515	765	506	596	547
ENSG00000184163	56	68	71	52	56	58
ENSG00000260179	9	9	10	21	10	8
ENSG00000160087	1701	1722	2223	1834	1963	1915
ENSG00000230415	21	23	32	38	29	30
ENSG00000162572	54	78	81	72	80	78
ENSG00000131584	1836	1791	2288	2193	2282	2134
ENSG00000278073	0	0	0	0	0	0
ENSG00000169972	541	647	767	577	667	646
ENSG00000127054	3049	2935	3823	3316	3405	3355
ENSG00000240731	97	84	119	119	122	104
ENSG00000224051	1426	1376	2058	1512	1657	1512
ENSG00000169962	72	77	96	67	61	79
ENSG00000107404	4781	4891	6424	5184	5555	5445
ENSG00000162576	593	550	661	668	681	693
ENSG00000175756	3435	3567	4393	3491	3879	3722
ENSG00000223663	1	0	0	1	0	0
ENSG00000221978	3433	3569	4594	4435	4441	4231
ENSG00000224870	701	663	806	748	714	776
ENSG00000242485	1833	1951	2329	1923	2073	1910
ENSG00000264293	0	0	0	0	0	0
ENSG00000272455	68	67	88	67	78	80
ENSG00000235098	463	408	573	446	474	443
ENSG00000225905	17	30	33	25	37	32
ENSG00000205116	2	2	0	1	1	4
ENSG00000225285	3	2	3	4	3	3
ENSG00000179403	1052	1087	1464	1086	1167	1264
ENSG00000215915	53	47	62	40	66	47
ENSG00000160072	2430	2423	3080	2568	2734	2658
ENSG00000197785	1927	2025	2515	1977	1949	2129
ENSG00000205090	32	34	50	43	61	42
ENSG00000160075	4001	4083	5516	3877	4361	4387
ENSG00000215014	15	13	11	15	17	10
ENSG00000279244	0	0	0	1	0	0
ENSG00000274481	0	0	0	0	0	0
ENSG00000228594	919	925	1419	886	1014	1009
ENSG00000272106	51	52	63	55	51	48
ENSG00000197530	1954	1939	2493	2140	2389	2253
ENSG00000189409	20	15	18	23	7	16
ENSG00000248333	2450	2494	2907	2423	2711	2717
ENSG00000272004	3	3	1	1	1	7
ENSG00000189339	1544	1759	2201	1862	1897	1864
ENSG00000269737	48	41	60	86	66	69
ENSG00000215914	0	0	1	2	1	3
ENSG00000008128	670	617	764	683	715	702
ENSG00000268575	90	105	115	110	100	124
ENSG00000227775	135	107	136	130	135	152
ENSG00000215790	172	154	219	197	175	189
ENSG00000008130	1909	2035	2494	2174	2304	2241
ENSG00000078369	17547	17541	23383	19606	20026	19648
ENSG00000231050	19	28	48	25	36	37
ENSG00000169885	7	11	19	9	17	15
ENSG00000178821	53	57	100	62	77	67
ENSG00000142609	9	5	5	4	10	5
ENSG00000233542	0	0	0	0	0	3
ENSG00000187730	2	2	3	3	1	0
ENSG00000226969	0	3	3	0	1	0
ENSG00000067606	1563	1604	2020	1757	1690	1728
ENSG00000271806	8	3	12	7	9	14
ENSG00000182873	113	103	152	133	152	157
ENSG00000162585	1038	1057	1414	1058	1269	1227
ENSG00000234396	1	2	3	3	2	0
ENSG00000157933	2012	2168	2832	2349	2452	2477
ENSG00000116151	258	260	352	258	292	269
ENSG00000272161	0	0	0	0	0	1
ENSG00000269896	27	29	36	39	30	33
ENSG00000272420	4	5	6	3	13	6
ENSG00000157916	3020	3066	4197	3462	3661	3725
ENSG00000157911	986	933	1232	968	918	960
ENSG00000149527	3850	4092	5166	5197	4952	4964
ENSG00000224387	15	32	25	17	23	33
ENSG00000229393	21	28	29	43	29	43
ENSG00000157881	1092	1076	1571	1252	1294	1294
ENSG00000197921	4	7	14	10	8	5
ENSG00000272449	33	18	37	31	21	33
ENSG00000238164	34	25	27	31	33	24
ENSG00000157873	201	240	289	297	336	299
ENSG00000225931	0	0	0	0	1	0
ENSG00000228037	0	0	1	5	1	1
ENSG00000157870	1325	1362	1694	1357	1392	1379
ENSG00000142606	1	2	5	0	0	5
ENSG00000237058	0	0	0	0	0	0
ENSG00000215912	14	16	25	15	18	19
ENSG00000283259	0	0	0	0	0	0
ENSG00000233234	0	0	0	0	0	0
ENSG00000231630	1	1	0	0	0	0
ENSG00000169717	0	0	0	0	0	0
ENSG00000177133	0	0	0	0	0	0
ENSG00000142611	6	13	7	10	5	6
ENSG00000283572	0	0	0	0	0	0
ENSG00000226286	0	0	0	0	0	0
ENSG00000279839	0	0	0	0	0	0
ENSG00000272235	0	0	0	0	0	0
ENSG00000130762	1387	1466	1783	1490	1566	1628
ENSG00000272088	1	0	2	1	0	2
ENSG00000162591	456	517	612	583	621	609
ENSG00000207776	0	0	0	0	0	0
ENSG00000238260	6	10	10	7	14	10
ENSG00000158109	1650	1611	2145	1647	1717	1712
ENSG00000116213	661	698	918	712	761	730
ENSG00000078900	105	128	176	139	115	128
ENSG00000227589	2	0	1	1	2	4
ENSG00000235131	1	3	1	2	0	1
ENSG00000227372	1561	1484	1708	1691	1753	1704
ENSG00000276189	0	0	0	0	0	0
ENSG00000162592	4	2	9	6	2	3
ENSG00000235169	78	79	90	80	86	90
ENSG00000130764	2177	2097	2647	2003	2208	2316
ENSG00000266075	3	0	1	0	3	3
ENSG00000272153	33	44	45	47	32	45
ENSG00000116198	1427	1465	1784	1543	1515	1529
ENSG00000169598	215	271	288	255	237	266
ENSG00000198912	1113	1156	1494	1232	1313	1357
ENSG00000236423	36	48	47	55	43	62
ENSG00000233304	0	0	0	0	0	0
ENSG00000226374	0	1	0	0	0	0
ENSG00000229280	0	0	0	0	0	0
ENSG00000235054	0	0	0	0	0	0
ENSG00000227169	0	0	0	0	0	0
ENSG00000232596	0	0	0	0	0	0
ENSG00000196581	281	256	348	286	298	306
ENSG00000231510	0	0	0	0	0	0
ENSG00000260972	0	0	0	0	0	0
ENSG00000283356	0	0	0	0	0	0
ENSG00000236948	0	0	0	0	0	0
ENSG00000264341	0	0	0	0	0	0
ENSG00000264101	1	0	1	2	2	1
ENSG00000131697	970	988	1265	1127	1111	1099
ENSG00000069424	479	545	552	552	612	516
ENSG00000116254	49	43	57	48	46	47
ENSG00000116251	18046	17192	23591	17857	19261	19087
ENSG00000226944	9	3	3	8	5	8
ENSG00000158286	584	623	723	833	865	779
ENSG00000116237	4024	4138	5458	4239	4499	4367
ENSG00000225077	47	49	57	42	61	59
ENSG00000173673	0	0	0	0	0	0
ENSG00000158292	2906	3056	4143	3081	3231	3253
ENSG00000097021	6174	6139	7989	5908	6249	6420
ENSG00000271746	0	0	0	0	0	0
ENSG00000069812	1564	1610	1988	1506	1503	1453
ENSG00000187017	702	819	1056	689	821	919
ENSG00000265392	1	0	0	0	0	0
ENSG00000231868	7	20	13	16	13	17
ENSG00000215788	1217	1196	1428	1645	1669	1448
ENSG00000171680	2745	2983	3736	3706	3736	3620
ENSG00000162408	1011	1011	1411	1199	1129	1151
ENSG00000253022	1	0	1	0	1	0
ENSG00000229519	4	11	5	14	9	14
ENSG00000173662	2	3	2	0	2	1
ENSG00000204859	632	666	822	706	720	734
ENSG00000162413	1543	1433	1963	1818	1780	1770
ENSG00000116273	1681	1779	2208	1847	1943	1937
ENSG00000041988	358	395	506	359	390	349
ENSG00000007923	2585	2485	2949	2532	2530	2474
ENSG00000228750	0	1	0	0	0	0
ENSG00000237436	2	11	10	2	1	6
ENSG00000171735	1636	1663	1674	1543	1703	1718
ENSG00000227950	0	0	1	0	2	0
ENSG00000237365	0	0	0	0	0	0
ENSG00000207056	0	0	0	0	0	0
ENSG00000237402	0	0	0	0	1	1
ENSG00000237728	0	0	0	0	0	0
ENSG00000225126	0	0	0	0	0	0
ENSG00000270171	0	0	0	0	0	0
ENSG00000270035	0	0	0	0	0	0
ENSG00000269978	0	0	0	0	0	0
ENSG00000049245	3672	3647	4695	4014	4049	4066
ENSG00000269925	12	30	26	46	39	34
ENSG00000049246	208	240	322	251	180	200
ENSG00000236266	5	9	12	12	6	8
ENSG00000049247	0	0	0	0	0	0
ENSG00000049249	20	28	21	62	70	62
ENSG00000270330	0	0	0	0	0	0
ENSG00000116288	8192	7719	9777	7768	8216	8061
ENSG00000200344	0	3	5	3	5	7
ENSG00000116285	14017	14052	18115	17171	17303	16943
ENSG00000238290	34	38	45	45	54	45
ENSG00000232848	0	0	0	0	4	1
ENSG00000229305	0	0	1	4	1	0
ENSG00000227634	5	3	10	3	3	1
ENSG00000200975	0	0	0	0	0	0
ENSG00000233645	0	0	0	0	0	0
ENSG00000251977	0	0	0	0	0	0
ENSG00000162426	81	90	104	91	107	104
ENSG00000252254	1	1	2	1	1	0
ENSG00000142599	3043	3008	4176	3680	3471	3548
ENSG00000232912	2	4	2	1	1	1
ENSG00000221083	0	0	1	0	1	0
ENSG00000270282	0	0	0	1	0	0
ENSG00000234619	0	1	2	6	0	0
ENSG00000224315	3	1	2	2	3	3
ENSG00000222511	4	1	0	0	0	0
ENSG00000226545	3	0	3	1	3	1
ENSG00000228423	2	2	4	1	1	1
ENSG00000229716	0	0	0	0	0	0
ENSG00000074800	97704	98865	128875	107718	112486	111782
ENSG00000274258	0	0	3	0	3	4
ENSG00000236269	27	41	44	53	49	53
ENSG00000230679	5	6	12	2	4	10
ENSG00000201725	0	2	0	0	0	0
ENSG00000238249	3	1	1	1	1	1
ENSG00000232208	0	0	0	0	0	0
ENSG00000232663	0	0	0	0	0	0
ENSG00000131686	0	0	1	0	1	2
ENSG00000265141	0	0	0	0	0	0
ENSG00000197241	0	0	0	0	1	1
ENSG00000142583	68	70	82	54	54	57
ENSG00000252404	0	0	0	0	1	0
ENSG00000180758	466	433	624	578	537	524
ENSG00000228526	173	184	224	212	201	218
ENSG00000234546	69	79	116	92	103	118
ENSG00000281937	3	4	3	6	2	5
ENSG00000049239	1594	1593	2148	1808	1899	1895
ENSG00000171621	765	908	1177	1035	1049	998
ENSG00000252956	0	0	0	0	0	0
ENSG00000235263	0	0	0	0	0	0
ENSG00000171612	245	253	323	214	244	232
ENSG00000231181	5	9	4	3	0	2
ENSG00000188807	494	599	743	534	540	597
ENSG00000171608	1156	1187	1697	1820	1685	1748
ENSG00000179840	0	0	0	0	0	0
ENSG00000233268	0	0	0	0	0	0
ENSG00000231789	18	22	21	21	17	17
ENSG00000171603	15673	16101	21429	16893	17443	17453
ENSG00000271264	0	2	0	2	1	1
ENSG00000280113	4	20	13	6	4	3
ENSG00000178585	3302	3341	4095	3084	3377	3364
ENSG00000223989	0	0	0	0	0	0
ENSG00000162441	1690	1625	1955	1702	1658	1734
ENSG00000228150	31	29	43	45	48	39
ENSG00000173614	663	664	855	727	813	695
ENSG00000202415	3	8	11	8	3	12
ENSG00000283611	2	7	3	2	7	1
ENSG00000265521	1	1	0	1	0	0
ENSG00000241326	0	0	0	0	0	0
ENSG00000162444	21	33	46	28	29	35
ENSG00000130939	3074	3091	3927	3214	3103	3218
ENSG00000224340	0	0	0	3	0	0
ENSG00000233623	1	5	1	0	1	0
ENSG00000201746	2	4	0	0	1	4
ENSG00000054523	5810	6035	7275	6558	6506	6300
ENSG00000264881	0	0	0	0	0	0
ENSG00000199562	1	2	0	2	4	2
ENSG00000264501	0	0	0	0	0	0
ENSG00000142657	8301	8388	10827	8627	9086	9104
ENSG00000271989	1	2	5	3	5	2
ENSG00000251503	42	34	31	52	35	42
ENSG00000175279	337	369	399	278	341	342
ENSG00000241563	6	9	8	10	10	11
ENSG00000160049	4554	4787	5852	4434	4815	4557
ENSG00000203469	0	0	0	0	0	0
ENSG00000142655	1018	1054	1251	1004	1066	1091
ENSG00000243267	3	0	2	1	1	2
ENSG00000130940	490	494	642	512	491	523
ENSG00000272078	25	18	38	30	35	24
ENSG00000225158	0	0	0	0	0	0
ENSG00000175262	1	0	2	3	2	6
ENSG00000215785	2	1	0	0	0	3
ENSG00000120948	6387	6404	7474	6552	6655	7150
ENSG00000277726	0	0	0	0	0	0
ENSG00000009724	51	32	47	55	63	39
ENSG00000271895	36	35	68	55	49	43
ENSG00000116649	2507	2729	3878	2529	2648	2773
ENSG00000171824	4214	4243	5673	4706	4694	4685
ENSG00000226849	17	10	16	25	27	22
ENSG00000230337	30	25	18	32	22	26
ENSG00000198793	4883	4862	6083	5156	4951	4990
ENSG00000225602	0	1	3	0	0	3
ENSG00000253086	0	0	0	0	0	0
ENSG00000171819	0	3	2	5	1	1
ENSG00000207451	0	1	1	1	2	0
ENSG00000238173	0	0	0	0	1	0
ENSG00000120942	687	626	839	631	669	681
ENSG00000238199	0	3	7	1	0	1
ENSG00000224338	0	0	0	0	0	0
ENSG00000204624	525	532	767	738	729	748
ENSG00000235643	37	55	61	42	51	43
ENSG00000116661	4990	5224	6163	5438	6110	6091
ENSG00000132879	1169	1119	1434	1180	1298	1334
ENSG00000116663	327	314	486	371	362	362
ENSG00000116670	1537	1614	2079	1628	1871	1669
ENSG00000162490	0	1	2	0	1	0
ENSG00000177674	2129	2152	3031	2510	2677	2466
ENSG00000215910	0	0	2	1	1	1
ENSG00000177553	0	0	0	0	0	0
ENSG00000177000	739	863	989	945	1009	940
ENSG00000011021	876	1014	1294	1170	1094	1073
ENSG00000242349	32	49	56	49	62	36
ENSG00000276470	0	0	0	0	0	0
ENSG00000278852	0	0	0	0	0	0
ENSG00000175206	20	18	17	22	26	22
ENSG00000275915	0	0	0	0	0	0
ENSG00000120937	0	1	1	0	2	1
ENSG00000224904	0	0	0	0	0	0
ENSG00000199347	0	3	3	2	1	3
ENSG00000201801	0	0	3	6	0	0
ENSG00000116685	2250	2385	3221	2370	2494	2474
ENSG00000083444	9856	10113	13797	11203	11620	11264
ENSG00000116688	9267	9209	11687	9657	9308	9831
ENSG00000270914	0	0	0	1	0	0
ENSG00000116691	1204	1237	1487	1365	1451	1344
ENSG00000202461	8	3	3	8	13	9
ENSG00000276869	0	0	0	0	0	0
ENSG00000243539	0	0	0	0	0	1
ENSG00000120949	621	599	785	562	492	565
ENSG00000201135	0	0	0	0	0	0
ENSG00000227875	0	0	1	0	0	0
ENSG00000028137	62	78	89	87	98	110
ENSG00000263676	0	0	0	0	0	0
ENSG00000225196	0	0	0	0	0	0
ENSG00000252969	0	0	0	0	0	0
ENSG00000048707	3688	3835	4926	4566	4200	4296
ENSG00000239149	13	9	12	11	20	12
ENSG00000229484	0	0	0	0	0	0
ENSG00000162496	859	848	1104	920	1045	955
ENSG00000221340	3	1	1	1	2	4
ENSG00000276830	0	1	0	1	1	1
ENSG00000272482	13	13	9	6	14	12
ENSG00000204518	0	0	0	0	0	0
ENSG00000226166	0	0	0	0	0	0
ENSG00000188984	0	0	0	0	0	0
ENSG00000157330	0	0	0	0	0	0
ENSG00000116726	0	0	0	0	0	0
ENSG00000116721	0	0	0	0	0	0
ENSG00000228338	0	0	0	0	0	0
ENSG00000239810	0	0	0	0	0	0
ENSG00000231103	0	0	0	0	0	0
ENSG00000179172	0	1	0	0	1	0
ENSG00000120952	0	0	0	0	0	0
ENSG00000243073	0	0	0	0	0	0
ENSG00000187545	0	0	0	0	0	0
ENSG00000204510	0	0	0	0	0	0
ENSG00000207434	0	0	0	0	0	0
ENSG00000234064	0	0	0	0	0	0
ENSG00000232423	0	0	0	0	0	0
ENSG00000274178	0	0	0	0	0	0
ENSG00000274764	0	0	0	0	0	0
ENSG00000229571	0	0	0	0	0	0
ENSG00000277058	0	0	0	0	0	0
ENSG00000277862	0	0	0	0	0	0
ENSG00000236179	0	0	0	0	0	0
ENSG00000275774	0	0	0	0	0	0
ENSG00000229978	0	0	0	0	0	0
ENSG00000233336	0	0	0	0	0	0
ENSG00000280267	0	0	0	0	0	0
ENSG00000179412	0	0	0	0	0	0
ENSG00000204505	0	0	0	0	0	0
ENSG00000279169	0	0	0	0	0	0
ENSG00000279804	0	0	0	0	0	0
ENSG00000250894	0	0	0	0	0	0
ENSG00000270601	0	0	0	0	0	0
ENSG00000231219	0	0	0	0	0	0
ENSG00000207511	0	0	0	0	0	0
ENSG00000182330	0	0	0	0	0	0
ENSG00000204501	0	0	0	0	0	0
ENSG00000237700	0	0	0	0	0	0
ENSG00000228229	0	0	0	0	0	0
ENSG00000204481	0	0	0	0	0	0
ENSG00000204480	0	0	0	0	0	0
ENSG00000204479	0	0	0	0	0	0
ENSG00000204478	0	0	0	0	0	0
ENSG00000162494	5	1	0	1	3	0
ENSG00000259961	0	0	0	0	0	0
ENSG00000215909	0	0	0	0	0	0
ENSG00000162493	897	896	1091	950	1021	1039
ENSG00000222952	0	0	0	0	0	0
ENSG00000237445	1	0	0	0	0	1
ENSG00000253085	0	0	0	0	0	0
ENSG00000116731	1915	1960	2382	2269	2041	2027
ENSG00000189337	444	457	631	456	516	512
ENSG00000252151	0	0	0	0	0	0
ENSG00000231606	0	1	0	3	0	0
ENSG00000234593	1	1	0	1	0	0
ENSG00000235829	0	0	0	0	2	0
ENSG00000175147	131	126	161	150	154	129
ENSG00000171729	1114	1133	1477	1224	1345	1298
ENSG00000204464	4	6	4	10	3	2
ENSG00000215720	2	0	1	0	2	1
ENSG00000278480	1	0	0	4	0	0
ENSG00000142621	49	39	64	54	41	61
ENSG00000233485	0	0	1	0	1	1
ENSG00000236045	1	2	1	0	1	0
ENSG00000228140	9	15	11	19	13	10
ENSG00000142634	6626	6733	8427	7023	8065	7937
ENSG00000162438	0	0	0	1	0	1
ENSG00000142615	0	2	0	0	0	0
ENSG00000215704	3	3	1	2	3	2
ENSG00000132906	379	371	535	422	406	393
ENSG00000116138	854	797	1039	920	956	932
ENSG00000251866	0	3	0	1	1	0
ENSG00000272510	3	2	1	1	1	2
ENSG00000116771	631	640	862	579	592	554
ENSG00000237301	12	12	19	13	10	12
ENSG00000235084	21	22	37	26	13	21
ENSG00000252417	0	0	0	0	0	0
ENSG00000236500	0	0	0	0	0	0
ENSG00000197312	2455	2506	2784	2707	2434	2494
ENSG00000215695	0	0	0	0	0	0
ENSG00000271742	2	2	3	1	2	0
ENSG00000116786	3253	3379	4316	3709	3906	3614
ENSG00000237938	24	29	51	46	37	39
ENSG00000162461	64	54	106	67	73	78
ENSG00000224459	0	0	7	3	5	4
ENSG00000162460	2	4	0	1	4	2
ENSG00000162458	6355	6795	9043	7968	8370	8255
ENSG00000224321	46	18	29	41	39	39
ENSG00000233954	203	186	322	214	209	198
ENSG00000178715	0	0	3	3	0	4
ENSG00000179743	150	167	179	183	180	196
ENSG00000065526	4647	4571	5751	5067	4534	4867
ENSG00000270620	0	2	0	1	0	0
ENSG00000116809	1016	1095	1333	1210	1227	1225
ENSG00000234607	0	0	0	0	3	1
ENSG00000231353	0	0	0	0	0	0
ENSG00000275503	0	0	0	0	0	0
ENSG00000224966	0	0	0	0	0	0
ENSG00000183888	0	0	0	0	0	0
ENSG00000233078	0	0	0	0	0	0
ENSG00000173641	4	0	3	3	0	2
ENSG00000186510	1	3	3	1	4	4
ENSG00000232456	2	2	6	4	2	1
ENSG00000184908	6	8	18	21	17	6
ENSG00000185519	88	97	166	102	95	112
ENSG00000142627	4935	5351	6662	6159	6380	6301
ENSG00000227959	45	33	55	48	45	56
ENSG00000224621	24	22	27	31	22	26
ENSG00000234166	0	0	0	0	0	0
ENSG00000142632	1930	2002	2399	1950	1991	1979
ENSG00000237276	193	186	176	202	176	203
ENSG00000132881	227	229	271	231	241	230
ENSG00000233929	1	3	3	3	3	3
ENSG00000037637	895	871	1147	975	1023	1016
ENSG00000055070	6897	6714	8087	6880	7228	6759
ENSG00000226457	3	3	4	3	3	1
ENSG00000187144	3	2	3	1	4	5
ENSG00000157191	2348	2412	3087	2985	3327	3168
ENSG00000226029	74	75	71	90	77	72
ENSG00000080947	320	300	379	347	352	291
ENSG00000206652	0	0	0	1	0	0
ENSG00000261135	16	4	11	7	11	5
ENSG00000224174	0	1	0	1	0	0
ENSG00000233421	18	29	23	10	8	12
ENSG00000277344	0	0	0	0	0	1
ENSG00000268991	0	0	0	0	0	0
ENSG00000225710	0	0	0	0	0	0
ENSG00000219481	739	673	831	834	767	749
ENSG00000271732	4	1	1	0	6	2
ENSG00000215908	818	836	950	916	881	904
ENSG00000186301	136	142	162	199	161	138
ENSG00000282143	0	0	2	2	0	0
ENSG00000207513	0	0	0	0	0	0
ENSG00000237847	0	0	0	0	0	0
ENSG00000280114	0	0	0	0	1	0
ENSG00000236698	74	58	34	57	56	50
ENSG00000268869	0	0	1	0	0	0
ENSG00000279151	0	0	0	0	0	0
ENSG00000279132	0	0	0	0	0	0
ENSG00000282740	0	0	0	0	0	0
ENSG00000058453	1483	1663	1920	1667	1719	1708
ENSG00000227684	4	1	1	5	2	3
ENSG00000207389	0	0	0	0	0	0
ENSG00000186715	70	79	103	103	88	89
ENSG00000223643	0	0	0	0	0	0
ENSG00000230239	0	0	0	0	0	0
ENSG00000263811	0	0	0	0	0	0
ENSG00000228549	46	67	70	61	57	41
ENSG00000277234	0	0	0	0	0	0
ENSG00000238142	125	84	145	99	114	125
ENSG00000235241	105	76	117	96	88	89
ENSG00000207005	4	0	2	3	1	4
ENSG00000272426	1	1	1	3	0	2
ENSG00000117122	2112	2046	2677	2568	2577	2482
ENSG00000226526	2	5	8	8	12	8
ENSG00000159363	2588	2767	3718	3066	3119	3169
ENSG00000117118	2663	2654	3804	2795	2980	2706
ENSG00000117115	224	272	375	269	270	238
ENSG00000204362	39	48	47	54	47	40
ENSG00000282843	1	3	3	0	4	0
ENSG00000142623	487	476	628	495	476	460
ENSG00000142619	603	576	701	413	363	376
ENSG00000266634	5	0	6	1	2	0
ENSG00000159339	4	8	9	7	9	7
ENSG00000280226	0	0	0	0	0	0
ENSG00000276747	0	0	0	0	0	0
ENSG00000179051	13053	13172	17061	13944	14873	14816
ENSG00000227751	0	0	0	0	0	0
ENSG00000074964	574	603	814	770	756	712
ENSG00000236648	0	0	0	0	0	0
ENSG00000117148	13	19	11	13	15	12
ENSG00000261781	0	0	0	0	0	0
ENSG00000117154	0	0	0	0	0	0
ENSG00000280222	0	0	0	0	0	0
ENSG00000230035	0	0	0	0	0	0
ENSG00000225387	0	0	0	0	0	0
ENSG00000179023	1	1	3	0	1	0
ENSG00000235282	0	0	0	0	0	0
ENSG00000225478	0	0	0	0	0	0
ENSG00000009709	0	0	0	0	0	0
ENSG00000179002	0	0	0	0	0	0
ENSG00000255275	2	0	1	1	2	0
ENSG00000159423	430	402	585	468	473	437
ENSG00000265606	0	0	0	0	0	0
ENSG00000221662	0	0	0	0	0	0
ENSG00000169991	1850	1758	2264	1743	1813	1931
ENSG00000272084	12	5	10	16	19	13
ENSG00000127481	13395	13713	17699	15799	14124	14630
ENSG00000230424	13	19	12	25	16	24
ENSG00000127463	4785	4854	6046	4685	4827	5000
ENSG00000053372	2623	2673	3190	2476	2698	2594
ENSG00000211454	10	12	11	4	16	7
ENSG00000162482	52	85	87	59	63	73
ENSG00000270728	33	44	54	31	42	49
ENSG00000053371	1727	1723	2303	1678	1859	1851
ENSG00000200403	1	1	3	5	4	0
ENSG00000040487	547	530	749	637	675	650
ENSG00000077549	9155	9296	11531	9877	10690	10197
ENSG00000240490	0	0	0	0	3	1
ENSG00000201609	0	0	0	0	0	0
ENSG00000235185	0	0	0	0	0	0
ENSG00000173436	2602	2502	2034	2208	2264	2434
ENSG00000270136	4	3	4	4	3	2
ENSG00000226396	21	29	25	25	28	28
ENSG00000158747	1507	1479	1852	1413	1592	1649
ENSG00000158748	0	0	0	0	0	0
ENSG00000162542	599	590	735	599	573	652
ENSG00000178828	0	0	0	0	0	0
ENSG00000235434	0	0	0	0	0	0
ENSG00000169914	601	590	730	724	642	653
ENSG00000188784	0	0	0	0	0	0
ENSG00000242688	0	0	0	0	0	0
ENSG00000188257	0	0	0	0	0	0
ENSG00000127472	0	0	0	0	0	0
ENSG00000117215	0	0	0	0	0	0
ENSG00000158786	2	3	2	1	1	1
ENSG00000227066	4	7	7	4	0	3
ENSG00000187980	0	1	3	0	0	0
ENSG00000225986	0	0	0	1	0	0
ENSG00000162543	4	3	3	2	2	2
ENSG00000228105	0	0	0	0	0	0
ENSG00000158816	1	1	3	0	3	1
ENSG00000226664	0	0	0	0	0	0
ENSG00000236963	3	2	5	0	2	4
ENSG00000226487	0	0	0	0	0	0
ENSG00000162545	12435	12212	14915	10226	10916	10805
ENSG00000090432	1258	1312	1670	1251	1318	1341
ENSG00000215520	0	0	0	0	0	0
ENSG00000183114	29	25	47	17	25	12
ENSG00000158825	2485	2477	3544	2867	3196	3090
ENSG00000158828	1338	1277	1623	1242	1417	1418
ENSG00000117242	198	175	220	225	209	222
ENSG00000244038	8160	8279	10129	8800	9057	8984
ENSG00000117245	96	130	154	118	130	131
ENSG00000235432	0	1	1	0	1	0
ENSG00000189410	1418	1406	1937	1582	1503	1673
ENSG00000233069	11	6	4	5	3	5
ENSG00000127483	9179	9243	11271	10516	10183	10277
ENSG00000075151	5272	4960	6318	5464	5558	5557
ENSG00000251914	0	0	0	0	0	0
ENSG00000221808	0	0	0	0	0	0
ENSG00000233072	4	4	1	6	3	5
ENSG00000236073	1	0	0	0	1	1
ENSG00000235112	1	0	1	3	1	0
ENSG00000117298	4739	4989	6802	6130	6310	6355
ENSG00000236936	0	1	1	0	0	0
ENSG00000231105	8	8	15	17	24	19
ENSG00000236216	1	0	0	0	0	0
ENSG00000228823	0	0	0	0	0	0
ENSG00000236009	0	0	0	0	0	0
ENSG00000227001	13	14	33	30	24	15
ENSG00000187952	13	17	2	6	2	8
ENSG00000186543	0	0	0	2	0	0
ENSG00000142794	624	594	706	706	702	651
ENSG00000176378	1	4	2	3	0	2
ENSG00000162551	70	72	119	78	100	93
ENSG00000233431	0	1	0	0	0	0
ENSG00000076864	271	274	399	338	342	298
ENSG00000090686	3529	3437	4132	3618	3490	3588
ENSG00000231978	3	0	0	0	0	0
ENSG00000187942	37	55	50	56	51	56
ENSG00000142798	8066	8621	11427	10981	9981	10361
ENSG00000232037	1	0	1	0	0	2
ENSG00000283234	1	7	5	4	2	1
ENSG00000219073	1	0	1	0	0	0
ENSG00000273610	0	0	0	0	0	0
ENSG00000201919	0	0	0	0	0	0
ENSG00000142789	0	0	0	0	0	1
ENSG00000278124	0	0	0	0	0	0
ENSG00000201273	0	0	0	0	0	0
ENSG00000228397	10	6	19	17	11	13
ENSG00000218510	339	380	394	326	400	306
ENSG00000070831	14636	14236	18148	15377	15661	15535
ENSG00000230068	19	13	23	22	20	18
ENSG00000271428	8	4	6	13	14	9
ENSG00000271840	1	5	8	7	4	3
ENSG00000162552	103	94	130	130	151	144
ENSG00000266564	0	0	0	0	0	0
ENSG00000234397	0	0	0	0	0	0
ENSG00000279625	0	0	0	0	0	0
ENSG00000184677	1250	1194	1628	1368	1326	1284
ENSG00000237200	12	7	17	14	8	11
ENSG00000070886	2	3	9	5	5	3
ENSG00000276835	0	0	0	0	0	0
ENSG00000173372	0	0	0	0	0	0
ENSG00000159189	0	0	0	0	0	0
ENSG00000173369	0	0	0	0	0	0
ENSG00000133216	1971	1838	2454	2114	2180	2191
ENSG00000265422	0	0	0	0	0	0
ENSG00000225952	2	3	1	0	0	0
ENSG00000264014	0	0	0	0	0	0
ENSG00000215906	0	0	0	0	0	1
ENSG00000227868	4	8	8	5	8	9
ENSG00000004487	6811	7055	8752	7305	7344	7198
ENSG00000240553	0	1	0	1	2	3
ENSG00000263793	0	0	0	0	0	0
ENSG00000266802	0	0	0	0	0	0
ENSG00000169641	5818	5783	7316	6861	6423	6551
ENSG00000229010	4	8	5	2	4	2
ENSG00000206935	1	1	4	1	6	1
ENSG00000252578	0	1	2	3	2	2
ENSG00000179546	64	34	64	54	57	50
ENSG00000215381	0	0	0	0	0	0
ENSG00000261326	128	115	143	119	117	121
ENSG00000125944	10890	10579	12847	10005	10363	10719
ENSG00000125945	1494	1498	1837	1579	1456	1523
ENSG00000249087	125	115	170	157	143	141
ENSG00000201405	0	0	0	0	0	0
ENSG00000271420	0	0	0	0	0	1
ENSG00000204219	68	69	87	50	65	66
ENSG00000232482	1	0	0	0	0	0
ENSG00000088280	2295	2402	3210	2352	2396	2424
ENSG00000007968	260	270	347	298	291	275
ENSG00000235052	13	22	18	15	18	28
ENSG00000117318	1938	1894	2414	1685	1931	1716
ENSG00000197880	0	1	1	2	1	0
ENSG00000229239	0	2	0	0	0	0
ENSG00000142676	29339	30496	41733	31443	35381	34989
ENSG00000011007	2555	2539	3377	2680	2673	2629
ENSG00000236810	107	123	159	130	134	134
ENSG00000057757	1207	1260	1536	1309	1407	1294
ENSG00000011009	4179	4083	5191	4240	4373	4556
ENSG00000117308	2891	2771	3410	2919	3047	2959
ENSG00000117305	1020	1037	1281	1085	1162	1055
ENSG00000179163	577	611	696	654	670	628
ENSG00000188822	0	0	0	2	6	0
ENSG00000229106	0	0	0	0	0	0
ENSG00000232557	0	0	0	0	0	0
ENSG00000264926	0	0	0	0	0	0
ENSG00000230228	1	0	0	0	0	0
ENSG00000189266	4235	4193	4993	4646	4873	4761
ENSG00000188529	4538	4398	5144	4706	4906	4878
ENSG00000215905	0	0	0	0	0	0
ENSG00000225315	0	1	0	0	0	0
ENSG00000142661	4	13	9	18	19	20
ENSG00000230703	0	0	0	0	0	0
ENSG00000142677	317	315	524	422	441	415
ENSG00000185436	1370	1361	1750	1419	1479	1451
ENSG00000230023	1	5	5	4	5	4
ENSG00000232298	12	10	21	11	10	25
ENSG00000158055	595	627	800	605	606	591
ENSG00000001460	1121	1132	1416	1195	1215	1181
ENSG00000001461	2475	2336	3043	2459	2554	2501
ENSG00000117602	1911	1965	2447	2290	2291	2177
ENSG00000264443	0	1	0	0	0	1
ENSG00000184454	5	4	5	7	6	4
ENSG00000227312	0	0	0	0	1	0
ENSG00000239106	0	0	0	0	0	0
ENSG00000133226	5160	4990	6485	5584	5592	5559
ENSG00000169504	14617	14333	17820	17389	17544	17527
ENSG00000238482	0	0	0	3	1	0
ENSG00000020633	0	0	2	1	2	0
ENSG00000278034	0	0	0	0	0	0
ENSG00000229162	2	2	4	3	3	3
ENSG00000261025	0	0	4	0	0	1
ENSG00000264371	0	0	0	0	0	0
ENSG00000233755	0	0	0	0	0	0
ENSG00000233419	0	0	0	0	0	0
ENSG00000231953	0	0	0	0	1	0
ENSG00000117614	2048	1878	2059	1810	2007	2118
ENSG00000117616	1390	1422	1517	1611	1606	1643
ENSG00000272432	4	4	6	8	5	9
ENSG00000261349	13	9	17	23	28	12
ENSG00000187010	21	14	26	25	19	27
ENSG00000224183	1	3	3	3	1	5
ENSG00000259984	1	2	8	2	1	6
ENSG00000183726	3727	3691	4097	4008	4284	4000
ENSG00000188672	44	40	62	54	50	57
ENSG00000238084	3	1	9	0	2	3
ENSG00000204178	896	938	1131	1007	1127	1025
ENSG00000157978	1954	2081	2843	2211	2225	2174
ENSG00000225643	1	4	5	4	5	6
ENSG00000117643	23	29	21	12	16	7
ENSG00000233478	0	0	2	1	3	1
ENSG00000162430	3483	3667	5207	3978	3961	4014
ENSG00000255054	0	0	0	0	0	0
ENSG00000228172	35	26	28	30	35	35
ENSG00000117640	790	779	948	831	819	828
ENSG00000272478	0	0	0	0	0	0
ENSG00000127423	510	519	733	603	541	558
ENSG00000236528	3	5	2	3	6	2
ENSG00000182749	1827	1696	2091	1883	1891	1814
ENSG00000207302	0	0	1	2	1	0
ENSG00000117632	10908	10796	14812	11757	12790	11774
ENSG00000229786	0	1	0	1	2	4
ENSG00000223624	3	2	2	4	1	1
ENSG00000158006	673	653	889	660	743	714
ENSG00000207237	0	0	0	0	0	0
ENSG00000252190	0	0	0	0	0	0
ENSG00000252691	0	0	0	0	0	0
ENSG00000158008	16	26	32	22	30	31
ENSG00000158014	1	1	2	5	3	4
ENSG00000158022	1	0	3	3	4	5
ENSG00000175087	240	226	254	274	231	228
ENSG00000197245	2	1	7	4	2	0
ENSG00000282872	0	0	1	0	0	0
ENSG00000236782	7	26	22	13	22	11
ENSG00000142684	44	48	69	56	66	53
ENSG00000142675	807	840	1089	993	1051	963
ENSG00000188782	5	2	1	0	2	1
ENSG00000236155	0	1	1	0	1	2
ENSG00000278572	0	0	0	0	0	0
ENSG00000130695	2286	2435	3149	2496	2461	2486
ENSG00000270733	2	4	4	0	2	2
ENSG00000142669	7746	8268	11969	9083	10011	9684
ENSG00000158062	746	738	899	722	771	746
ENSG00000169442	4	6	4	6	5	5
ENSG00000176092	1128	1174	1552	1278	1359	1297
ENSG00000225854	4	8	2	4	10	7
ENSG00000176083	0	0	0	0	0	0
ENSG00000131914	5	7	8	6	3	7
ENSG00000117682	1100	1163	1435	1278	1201	1241
ENSG00000223583	3	1	5	5	2	3
ENSG00000225891	2	11	5	3	10	5
ENSG00000198830	16132	15673	18260	15933	17106	16423
ENSG00000224129	0	0	0	0	0	0
ENSG00000117676	3973	4125	5366	4679	4734	4840
ENSG00000238705	0	0	0	0	0	0
ENSG00000243905	0	0	0	0	1	0
ENSG00000252802	0	0	0	0	0	0
ENSG00000252429	0	0	0	0	0	0
ENSG00000229247	0	0	0	0	0	0
ENSG00000238316	0	0	0	0	0	0
ENSG00000235069	0	0	0	0	0	0
ENSG00000260063	49	47	55	33	42	60
ENSG00000117713	4523	4696	6124	5016	5066	5177
ENSG00000060642	836	864	1080	895	945	876
ENSG00000241188	0	2	0	1	0	0
ENSG00000204160	1132	1134	1513	1268	1278	1391
ENSG00000175793	36470	37303	49314	42298	47933	46424
ENSG00000226698	0	0	0	0	0	0
ENSG00000142751	1136	1172	1496	1224	1277	1275
ENSG00000198746	626	664	758	584	641	672
ENSG00000090273	9365	9398	11964	8828	9727	9462
ENSG00000131910	18	22	22	18	12	16
ENSG00000175707	786	808	1168	950	994	886
ENSG00000172746	5	6	10	8	4	4
ENSG00000224064	5	3	5	5	7	1
ENSG00000225294	0	8	8	15	6	9
ENSG00000253368	3247	3451	4523	3458	3779	3875
ENSG00000158246	1117	1135	1469	1227	1242	1229
ENSG00000280403	0	2	0	0	2	0
ENSG00000090020	3314	3367	4780	4298	4239	4465
ENSG00000229985	0	0	0	0	0	0
ENSG00000214973	0	1	0	0	1	0
ENSG00000225159	13	11	20	9	7	14
ENSG00000225990	0	0	0	0	0	0
ENSG00000224311	0	0	0	0	0	0
ENSG00000142784	2141	2233	2972	2482	2515	2554
ENSG00000252098	4	1	2	0	2	1
ENSG00000243659	0	1	1	2	4	0
ENSG00000186501	643	616	858	755	756	779
ENSG00000206888	2	1	3	0	4	5
ENSG00000241547	5	3	10	6	11	7
ENSG00000142765	954	1050	1327	1019	1145	1053
ENSG00000142733	2038	2203	2800	2444	2442	2410
ENSG00000142748	6	20	10	2	6	5
ENSG00000174950	99	87	101	103	94	101
ENSG00000231207	0	0	0	1	5	0
ENSG00000181773	141	157	145	148	117	142
ENSG00000158195	10658	10806	14386	11836	12148	11812
ENSG00000241169	1	0	1	1	1	3
ENSG00000237429	5	3	1	8	7	1
ENSG00000126705	1684	1823	2335	1896	1927	1809
ENSG00000000938	7	11	12	7	14	15
ENSG00000235912	4	5	5	9	3	4
ENSG00000233975	0	0	2	1	2	1
ENSG00000126709	1124	1099	1562	1473	1465	1621
ENSG00000225886	8	9	18	9	9	5
ENSG00000206767	0	0	0	1	0	0
ENSG00000226662	0	0	0	0	0	0
ENSG00000207095	0	0	0	0	0	0
ENSG00000009780	435	484	625	585	558	472
ENSG00000231344	0	3	3	8	3	2
ENSG00000230833	0	0	0	2	0	3
ENSG00000117758	1028	1068	1297	1073	1129	1077
ENSG00000269971	0	0	0	0	3	0
ENSG00000270031	3	3	0	5	6	2
ENSG00000223062	0	0	0	0	0	0
ENSG00000117751	2254	2147	2686	2164	2227	2143
ENSG00000252947	1	5	3	0	3	1
ENSG00000278868	0	0	0	0	0	0
ENSG00000130775	544	529	715	641	662	606
ENSG00000117748	2683	2651	3560	2824	2959	2866
ENSG00000130768	329	370	479	411	385	398
ENSG00000227050	0	4	1	2	3	2
ENSG00000158156	295	311	441	331	342	375
ENSG00000158161	1776	1857	2384	2050	2029	2032
ENSG00000238231	1	1	0	2	1	1
ENSG00000240750	5	2	2	4	4	6
ENSG00000228589	34	26	23	15	25	39
ENSG00000228943	0	0	0	0	0	0
ENSG00000214812	0	0	0	0	0	0
ENSG00000253005	1	0	0	0	0	2
ENSG00000169403	2164	2158	2889	2859	2857	2726
ENSG00000126698	4770	4438	5377	4201	4548	4730
ENSG00000130770	4231	4463	6005	4602	4966	4845
ENSG00000270605	115	100	132	109	92	82
ENSG00000271398	14	15	12	22	11	10
ENSG00000130766	1858	1920	2718	2782	2996	2891
ENSG00000130772	930	885	1216	960	1060	973
ENSG00000204138	2881	3099	3645	3174	3195	3131
ENSG00000206779	0	0	2	0	4	0
ENSG00000229820	1	1	1	2	1	0
ENSG00000221216	0	1	3	2	1	0
ENSG00000180198	4524	4555	5680	4392	4794	4743
ENSG00000242125	1357	1329	1545	1438	1375	1424
ENSG00000274266	0	0	0	0	0	0
ENSG00000200087	27	33	44	62	31	47
ENSG00000231468	8	8	10	11	12	12
ENSG00000279443	67	85	93	67	67	63
ENSG00000180098	904	925	1100	1047	1053	929
ENSG00000197989	618	571	749	735	689	727
ENSG00000221539	33	31	26	17	29	26
ENSG00000278274	0	0	0	0	0	0
ENSG00000273544	0	0	0	0	0	0
ENSG00000274582	0	0	0	0	0	0
ENSG00000280498	0	0	0	0	0	0
ENSG00000120656	1112	1052	1316	1045	1078	1074
ENSG00000188060	16	10	16	11	21	18
ENSG00000229388	11	14	8	9	6	12
ENSG00000270103	0	0	0	0	0	0
ENSG00000274978	5	5	4	4	1	1
ENSG00000162419	848	903	1139	1040	1078	1011
ENSG00000252777	1	0	2	1	0	0
ENSG00000198492	2898	2856	3736	3218	3109	3086
ENSG00000116329	8	3	1	2	5	0
ENSG00000233427	1	0	2	0	0	2
ENSG00000199756	0	0	0	0	0	0
ENSG00000159023	1401	1466	1600	1670	1734	1712
ENSG00000225616	1	2	2	2	2	0
ENSG00000206704	0	0	0	0	0	0
ENSG00000277958	0	0	0	2	0	0
ENSG00000253304	937	882	1097	979	973	986
ENSG00000225750	4	4	0	0	1	2
ENSG00000116350	7429	7203	8617	7443	7766	7970
ENSG00000277916	0	0	0	0	0	0
ENSG00000116353	643	669	810	578	657	610
ENSG00000237934	2	3	1	5	6	1
ENSG00000060656	1928	2125	2806	2130	2358	2274
ENSG00000230523	2	4	0	0	0	0
ENSG00000225011	0	0	0	0	0	0
ENSG00000228176	0	2	2	1	2	3
ENSG00000270927	0	0	0	0	0	0
ENSG00000233399	0	0	0	0	0	0
ENSG00000233372	0	0	0	0	0	0
ENSG00000231251	0	0	0	0	0	0
ENSG00000236335	0	0	0	0	0	0
ENSG00000231949	0	0	0	0	0	0
ENSG00000162510	16	24	14	25	17	16
ENSG00000186056	85	76	91	68	71	74
ENSG00000162511	20	23	18	40	33	29
ENSG00000264773	0	0	0	0	0	0
ENSG00000229607	0	0	0	0	0	0
ENSG00000223382	7	9	5	2	5	4
ENSG00000222784	0	0	0	0	0	0
ENSG00000235143	0	0	0	0	0	0
ENSG00000162512	2928	2909	3952	3161	3228	3184
ENSG00000266210	0	0	0	0	0	0
ENSG00000134644	5784	5601	6877	6131	5809	5908
ENSG00000237329	0	2	0	2	0	1
ENSG00000232768	3	0	1	1	3	0
ENSG00000215900	0	0	0	0	0	0
ENSG00000225142	0	0	0	0	0	0
ENSG00000084628	11	5	9	6	9	2
ENSG00000060688	2377	2445	3023	2390	2547	2540
ENSG00000229447	14	12	13	18	6	27
ENSG00000121766	1792	1930	2430	1936	2097	2059
ENSG00000229044	2	0	1	0	4	2
ENSG00000121769	63	69	78	71	65	73
ENSG00000168528	18201	19658	28043	21485	22649	21944
ENSG00000215899	0	0	0	0	1	0
ENSG00000206981	0	0	0	0	0	0
ENSG00000260386	1	0	1	2	1	0
ENSG00000265961	0	0	0	0	0	0
ENSG00000229167	52	56	61	54	28	56
ENSG00000142910	9080	9594	12532	9786	10321	9622
ENSG00000121764	1	4	6	2	4	6
ENSG00000162517	2060	2189	3018	2288	2421	2240
ENSG00000235790	62	54	72	63	58	76
ENSG00000264078	1	0	1	4	3	4
ENSG00000084636	4233	4389	5459	5365	5615	5481
ENSG00000121753	124	171	215	181	182	175
ENSG00000266580	1	7	0	0	1	0
ENSG00000254545	9	10	16	12	8	12
ENSG00000134668	771	820	1063	915	909	916
ENSG00000203620	0	0	0	0	0	0
ENSG00000269967	11	9	2	13	14	8
ENSG00000184007	3980	3939	5314	4550	4632	4515
ENSG00000228634	4	11	9	5	7	15
ENSG00000121774	7896	8265	10729	8142	8555	8828
ENSG00000203325	8	7	9	9	7	5
ENSG00000121775	687	588	850	760	726	737
ENSG00000266203	0	0	0	0	0	0
ENSG00000276493	0	1	0	0	0	0
ENSG00000025800	5484	5479	7041	5868	5647	5490
ENSG00000250135	0	0	0	0	0	0
ENSG00000084652	4236	4239	5356	4792	4780	4809
ENSG00000160050	445	469	530	483	523	509
ENSG00000224066	6	15	13	18	10	4
ENSG00000160051	296	289	411	353	371	352
ENSG00000222046	10	7	11	9	5	11
ENSG00000160055	476	394	621	623	583	536
ENSG00000084623	8495	8572	11040	9006	9475	9119
ENSG00000220785	157	186	238	251	216	228
ENSG00000183615	57	63	78	86	80	92
ENSG00000182866	32	25	44	33	32	42
ENSG00000277617	0	0	0	0	0	0
ENSG00000252450	0	0	0	0	0	0
ENSG00000116478	7766	7827	9589	8129	8564	8331
ENSG00000175130	3117	3167	4132	3559	3822	3592
ENSG00000233775	0	0	0	0	1	2
ENSG00000162526	18	22	17	36	22	29
ENSG00000225828	54	94	103	86	121	99
ENSG00000160058	2756	2677	3294	2910	3030	3035
ENSG00000224333	0	0	0	0	2	0
ENSG00000270850	0	0	0	0	0	0
ENSG00000229259	0	0	0	0	0	0
ENSG00000263529	0	0	0	0	0	0
ENSG00000254553	0	0	0	0	3	0
ENSG00000273274	15	24	19	19	23	25
ENSG00000160062	396	420	514	494	510	510
ENSG00000176261	1013	968	1181	972	987	976
ENSG00000200591	1	1	2	4	1	0
ENSG00000162521	7228	7361	9165	8213	8478	8101
ENSG00000162520	188	174	224	194	215	191
ENSG00000224409	32	13	35	30	29	25
ENSG00000162522	9032	9688	13446	11124	11475	11255
ENSG00000134684	5480	5559	7311	6293	6768	6807
ENSG00000116497	1729	1702	2167	1949	1972	1991
ENSG00000160097	27	15	14	16	13	11
ENSG00000121905	16	11	10	15	13	9
ENSG00000121900	1836	1905	2410	2024	2229	2170
ENSG00000116514	1542	1614	2129	1957	2115	2096
ENSG00000278966	6	1	1	0	1	3
ENSG00000217644	2	2	1	5	2	3
ENSG00000239670	4	1	4	4	6	2
ENSG00000236065	0	1	2	1	3	1
ENSG00000004455	10683	10161	12338	10244	10728	10599
ENSG00000276645	0	2	2	0	1	0
ENSG00000142920	176	190	226	215	177	213
ENSG00000278997	15	12	12	18	19	19
ENSG00000116525	393	401	575	448	460	456
ENSG00000279179	21	31	35	39	34	37
ENSG00000160094	857	818	1114	746	841	818
ENSG00000270115	3	11	4	9	8	4
ENSG00000184389	20	17	20	12	27	22
ENSG00000225313	174	188	264	232	238	249
ENSG00000134686	3503	3724	5272	3989	4154	4093
ENSG00000222112	17	24	28	24	27	20
ENSG00000233246	9	16	6	14	16	22
ENSG00000234512	0	0	0	0	1	0
ENSG00000121903	238	205	255	248	202	231
ENSG00000235907	0	1	2	0	0	4
ENSG00000121904	2	5	3	5	6	2
ENSG00000227000	0	0	0	0	0	0
ENSG00000176256	0	0	0	0	0	0
ENSG00000231163	0	0	0	0	0	0
ENSG00000201148	0	0	0	0	0	0
ENSG00000142698	0	0	0	0	1	1
ENSG00000270241	0	0	0	0	0	0
ENSG00000207941	0	0	0	0	0	0
ENSG00000163866	1531	1415	1822	1501	1636	1652
ENSG00000189280	1586	1618	2243	1858	1930	1817
ENSG00000189433	409	430	565	578	573	628
ENSG00000255811	0	0	0	0	0	0
ENSG00000188910	5377	5387	7339	6160	6572	6600
ENSG00000187513	1	1	4	2	1	1
ENSG00000230163	37	28	47	36	39	39
ENSG00000116544	10	8	10	6	12	1
ENSG00000241014	92	92	146	119	117	136
ENSG00000271741	17	26	23	21	21	19
ENSG00000243749	283	315	325	315	336	333
ENSG00000163867	606	625	685	710	638	704
ENSG00000233940	0	0	0	0	0	0
ENSG00000197056	1332	1240	1547	1470	1450	1395
ENSG00000228348	0	1	0	0	0	0
ENSG00000116560	10137	10171	12117	10590	10695	10679
ENSG00000201868	1	0	0	0	0	0
ENSG00000146463	2472	2409	2965	2621	2580	2509
ENSG00000240374	1	0	0	0	0	0
ENSG00000201542	0	0	0	0	0	1
ENSG00000229994	11	5	9	7	7	3
ENSG00000227409	2	0	2	1	0	2
ENSG00000278702	0	0	0	0	0	0
ENSG00000142687	1956	2021	2468	2154	2278	2274
ENSG00000236274	0	0	0	0	2	3
ENSG00000020129	1232	1360	1711	1351	1277	1320
ENSG00000239636	13	4	9	1	5	8
ENSG00000116819	25	40	26	29	17	23
ENSG00000126067	5972	6086	8800	6859	7189	6727
ENSG00000142686	853	866	1016	849	879	930
ENSG00000092853	2400	2358	2706	2631	2690	2717
ENSG00000232335	1	0	2	1	0	1
ENSG00000134698	892	886	1123	994	1002	1059
ENSG00000092847	2008	1979	2583	2090	2104	2125
ENSG00000271164	0	0	0	0	0	0
ENSG00000271914	0	0	0	0	0	0
ENSG00000126070	1232	1260	1520	1424	1391	1402
ENSG00000271554	4	4	7	8	5	8
ENSG00000232862	1	0	0	0	0	2
ENSG00000092850	6	1	2	5	1	2
ENSG00000116863	1064	1094	1373	1158	1282	1170
ENSG00000171812	130	145	200	174	145	178
ENSG00000054116	2484	2609	3233	2743	2898	2609
ENSG00000116871	13677	13859	17507	14598	16424	16790
ENSG00000264592	0	0	0	0	0	0
ENSG00000054118	7893	7489	9607	7766	8022	8010
ENSG00000231849	0	1	1	0	0	1
ENSG00000214193	1862	1989	2460	2783	2555	2690
ENSG00000142694	619	638	659	722	759	805
ENSG00000116883	760	770	901	1025	1104	1029
ENSG00000196182	707	763	1013	916	990	921
ENSG00000181817	596	518	678	524	534	528
ENSG00000222821	0	0	0	0	0	0
ENSG00000116885	212	180	257	200	217	210
ENSG00000201448	1	1	1	2	0	0
ENSG00000116898	2629	2626	3588	2796	2883	2837
ENSG00000119535	0	1	1	1	0	0
ENSG00000230214	0	0	0	0	0	0
ENSG00000234481	0	0	0	0	0	0
ENSG00000163873	0	0	0	0	0	0
ENSG00000264698	0	0	0	0	0	0
ENSG00000207328	0	0	0	0	0	0
ENSG00000223944	0	0	0	0	0	0
ENSG00000252368	0	0	0	0	0	0
ENSG00000230451	0	0	0	0	0	0
ENSG00000233621	86	115	115	181	185	154
ENSG00000163874	891	915	1269	1780	1746	1714
ENSG00000163875	2096	2050	2653	2236	2451	2286
ENSG00000263675	8	5	9	8	8	13
ENSG00000163877	874	892	1102	920	902	954
ENSG00000232273	0	0	0	1	0	4
ENSG00000237749	1	0	0	0	1	0
ENSG00000163879	14	7	18	12	24	13
ENSG00000134697	3167	3101	3735	3011	3195	3198
ENSG00000169218	0	0	0	0	0	0
ENSG00000116922	799	761	1044	813	878	815
ENSG00000134690	3353	3514	4625	3615	3808	3540
ENSG00000183317	1	2	4	2	2	2
ENSG00000200421	0	0	0	1	0	0
ENSG00000214141	0	0	0	0	0	0
ENSG00000227416	0	0	0	0	0	0
ENSG00000185090	360	420	573	376	404	381
ENSG00000233728	0	0	0	0	0	0
ENSG00000196449	557	586	704	549	603	563
ENSG00000197982	1067	1231	1475	1076	1207	1186
ENSG00000188786	1208	1172	1426	1330	1270	1347
ENSG00000235673	1	0	0	1	0	0
ENSG00000204084	454	492	642	504	556	556
ENSG00000230955	0	0	0	0	0	0
ENSG00000252448	0	2	3	0	0	1
ENSG00000222282	1	1	1	0	2	0
ENSG00000277168	0	0	0	0	0	0
ENSG00000183431	4973	4906	5916	4860	5002	4889
ENSG00000212541	12	8	12	14	14	8
ENSG00000183386	732	763	1023	765	798	786
ENSG00000183520	1749	1754	2396	1696	1926	1811
ENSG00000185668	20	16	21	14	12	13
ENSG00000224592	3	3	1	1	4	1
ENSG00000223589	0	0	0	0	0	0
ENSG00000265596	0	0	0	0	0	0
ENSG00000237290	0	0	0	0	1	1
ENSG00000275350	0	0	0	0	0	0
ENSG00000200796	0	0	0	0	0	0
ENSG00000238063	0	0	0	0	0	0
ENSG00000215895	2	2	3	0	0	4
ENSG00000116954	1059	1098	1370	1179	1321	1290
ENSG00000273637	0	2	0	0	0	0
ENSG00000228436	7	16	17	24	20	13
ENSG00000214114	1252	1179	1436	1155	1140	1230
ENSG00000274944	8	4	9	10	9	10
ENSG00000131233	0	1	3	3	3	3
ENSG00000158315	415	411	453	554	589	561
ENSG00000199963	1	0	0	0	0	0
ENSG00000207466	0	0	0	0	0	0
ENSG00000235549	0	1	0	0	0	2
ENSG00000174574	3140	3115	4281	3619	3738	3785
ENSG00000168653	4525	4453	6550	4668	5111	4873
ENSG00000127603	14226	14087	17286	17158	15214	15802
ENSG00000206654	1	0	0	1	2	4
ENSG00000222378	0	2	1	0	1	0
ENSG00000270040	0	2	0	3	2	0
ENSG00000226438	2	2	0	3	1	2
ENSG00000217897	0	2	1	1	1	0
ENSG00000183682	14	11	23	17	30	17
ENSG00000237624	36	44	40	47	25	47
ENSG00000182109	77	69	92	72	85	75
ENSG00000243970	34	11	19	25	26	32
ENSG00000090621	8809	8748	11819	8540	8842	8969
ENSG00000228060	17	18	30	23	30	18
ENSG00000201457	11	7	7	10	8	9
ENSG00000163909	2	2	1	1	0	1
ENSG00000225903	0	0	0	0	0	0
ENSG00000116981	0	2	0	1	0	1
ENSG00000116983	89	59	112	75	71	76
ENSG00000084072	2234	2310	2921	2311	2392	2251
ENSG00000225333	0	0	1	0	0	0
ENSG00000252413	0	0	0	0	0	0
ENSG00000116985	502	431	682	534	555	513
ENSG00000198754	53	51	58	66	50	61
ENSG00000261798	17	11	15	8	16	13
ENSG00000229213	0	0	0	0	0	0
ENSG00000043514	1047	1102	1344	1168	1163	1110
ENSG00000202222	0	0	0	2	0	5
ENSG00000116990	232	250	309	221	214	210
ENSG00000236546	1	1	1	2	0	4
ENSG00000207356	0	0	0	2	0	0
ENSG00000168389	772	762	1124	939	1005	946
ENSG00000228477	21	34	52	44	45	46
ENSG00000131236	23080	22843	29304	25806	26255	25996
ENSG00000131238	5210	5105	6840	5343	5579	5389
ENSG00000226745	0	0	0	0	0	0
ENSG00000117000	1677	1627	2076	1999	1901	1684
ENSG00000207508	1	2	0	1	0	4
ENSG00000188800	0	2	0	3	0	0
ENSG00000259943	167	170	234	186	167	176
ENSG00000084073	3115	2877	3409	3141	2959	3019
ENSG00000231296	3	3	2	1	1	2
ENSG00000049089	69	88	129	78	72	81
ENSG00000227311	0	0	0	0	0	1
ENSG00000084070	960	1103	1322	990	1024	1031
ENSG00000213172	0	0	0	0	0	0
ENSG00000187801	259	279	325	290	297	289
ENSG00000260920	148	152	140	160	173	183
ENSG00000279667	1	0	0	1	5	6
ENSG00000187815	181	202	249	208	210	237
ENSG00000238287	36	24	38	30	27	37
ENSG00000164002	315	354	456	401	421	409
ENSG00000227278	5	2	0	1	0	2
ENSG00000238186	18	17	18	28	18	16
ENSG00000117010	163	149	157	145	124	166
ENSG00000236505	0	0	0	0	0	0
ENSG00000233910	0	0	0	0	0	0
ENSG00000117016	973	1025	1383	1391	1404	1303
ENSG00000237899	6	8	10	10	0	3
ENSG00000272145	63	48	60	54	53	42
ENSG00000066136	1454	1484	1949	1579	1569	1568
ENSG00000198974	0	0	0	0	0	0
ENSG00000207962	0	2	0	0	0	0
ENSG00000117013	14	11	21	14	12	12
ENSG00000264582	0	0	0	0	0	0
ENSG00000179862	2372	2452	3354	1779	2206	2502
ENSG00000229528	1	0	1	2	1	1
ENSG00000228940	0	0	0	0	0	1
ENSG00000233118	0	0	0	0	0	0
ENSG00000171793	3004	2998	3915	3241	3155	3258
ENSG00000281207	143	152	136	140	131	116
ENSG00000171790	56	57	66	65	57	63
ENSG00000010803	747	718	1011	866	799	797
ENSG00000215893	0	0	0	1	1	5
ENSG00000235358	1	3	0	0	0	1
ENSG00000213987	0	0	0	0	0	0
ENSG00000204060	45	37	59	63	59	69
ENSG00000229901	3	1	6	2	0	1
ENSG00000252563	0	0	0	0	0	0
ENSG00000127129	16	9	17	8	11	15
ENSG00000127124	315	342	404	343	280	318
ENSG00000230881	1	0	0	0	0	0
ENSG00000230638	101	108	103	103	103	130
ENSG00000227538	0	0	0	0	0	0
ENSG00000228776	0	0	0	0	0	0
ENSG00000044012	0	0	0	0	0	0
ENSG00000197273	0	0	0	0	0	0
ENSG00000198815	2301	2301	2884	2769	2594	2654
ENSG00000227527	13	5	6	3	5	4
ENSG00000177181	0	0	0	0	1	0
ENSG00000235002	0	0	0	0	0	0
ENSG00000066185	8	14	10	15	8	7
ENSG00000127125	1597	1706	2076	1760	1805	1762
ENSG00000186409	46	26	51	28	42	29
ENSG00000230116	0	0	0	0	0	0
ENSG00000236876	0	0	0	0	0	0
ENSG00000200254	0	0	0	0	0	0
ENSG00000236180	0	0	0	0	0	0
ENSG00000171960	1543	1499	2009	1397	1628	1533
ENSG00000234917	3	5	10	4	4	4
ENSG00000065978	51645	49525	60714	44796	51337	53067
ENSG00000164007	5	2	1	5	3	9
ENSG00000117385	1525	1447	1896	1519	1537	1628
ENSG00000164008	60	62	62	61	51	48
ENSG00000283580	6	7	8	18	12	15
ENSG00000228452	32	40	44	33	47	34
ENSG00000274386	21	8	24	12	21	13
ENSG00000177868	430	416	547	430	514	478
ENSG00000164010	394	350	453	392	422	424
ENSG00000228192	107	105	147	105	130	112
ENSG00000164011	332	320	392	339	397	333
ENSG00000233708	1	0	0	0	0	0
ENSG00000237090	0	0	0	0	1	1
ENSG00000225099	0	0	0	0	0	1
ENSG00000117394	11096	11638	15379	13679	14247	13864
ENSG00000227533	77	79	101	72	80	65
ENSG00000207256	1	0	1	1	4	2
ENSG00000283136	0	0	0	0	0	0
ENSG00000277513	0	0	0	0	0	0
ENSG00000186973	28	21	29	30	43	34
ENSG00000117395	4536	4315	4832	4129	4344	4271
ENSG00000243710	30	24	33	29	49	49
ENSG00000199240	0	0	0	0	0	0
ENSG00000179178	277	325	385	325	327	303
ENSG00000253313	291	322	361	311	376	364
ENSG00000066056	3	3	5	1	5	7
ENSG00000117400	24	31	22	20	24	22
ENSG00000234694	131	135	171	132	137	148
ENSG00000117399	7921	8180	10303	8280	8314	7931
ENSG00000066322	4101	4004	5074	4276	4618	4534
ENSG00000159479	1476	1477	1876	1620	1585	1574
ENSG00000229431	50	40	44	64	49	53
ENSG00000198198	1569	1762	2314	2117	1928	1837
ENSG00000229372	5	6	4	9	6	9
ENSG00000274975	0	0	0	0	0	0
ENSG00000178922	920	969	1176	1048	1189	1234
ENSG00000229348	12	12	10	13	19	13
ENSG00000142949	23462	23918	31261	27485	27400	27423
ENSG00000066135	3630	3565	4424	3850	3688	4007
ENSG00000236200	71	63	92	70	88	78
ENSG00000126091	352	315	446	357	391	394
ENSG00000229444	4	0	3	0	1	1
ENSG00000283414	3	0	0	0	0	0
ENSG00000233674	5	0	0	6	2	0
ENSG00000283477	0	0	0	0	1	1
ENSG00000224751	2	0	1	0	1	2
ENSG00000117407	1393	1365	2048	1640	1744	1798
ENSG00000237950	21	20	28	13	27	31
ENSG00000117408	1557	1608	2192	1813	1826	1757
ENSG00000132768	856	886	1234	888	981	918
ENSG00000117410	2035	2115	2809	2291	2370	2312
ENSG00000117411	2603	2691	3587	2846	2947	2868
ENSG00000159214	728	788	946	1035	1102	1098
ENSG00000196517	713	700	1020	1031	1058	1063
ENSG00000230615	67	57	71	49	86	88
ENSG00000227163	1	1	0	4	1	2
ENSG00000271647	0	0	0	0	1	1
ENSG00000239560	0	0	0	0	0	0
ENSG00000171872	10	5	17	11	6	13
ENSG00000233514	0	0	4	1	1	0
ENSG00000283039	0	0	1	0	0	0
ENSG00000226804	0	0	0	0	0	0
ENSG00000200171	0	0	0	0	0	0
ENSG00000238037	1	0	0	0	1	1
ENSG00000227994	0	0	0	0	0	0
ENSG00000271329	1	0	0	1	1	1
ENSG00000178028	1576	1663	1867	1740	1744	1717
ENSG00000117419	1855	1924	2496	1840	2042	1929
ENSG00000233602	14	6	15	14	15	11
ENSG00000199385	0	0	0	0	0	0
ENSG00000187147	2587	2690	3281	2243	2571	2594
ENSG00000263381	0	0	0	0	0	0
ENSG00000126106	317	346	452	334	325	390
ENSG00000198520	25	26	28	22	23	26
ENSG00000199377	2	0	0	3	2	1
ENSG00000200169	2	2	11	5	3	3
ENSG00000142945	5004	5206	6450	5023	5312	5084
ENSG00000225721	32	26	46	32	24	38
ENSG00000142937	30619	31547	42875	32819	36704	33903
ENSG00000264294	0	0	0	0	0	0
ENSG00000200913	15	9	11	17	16	10
ENSG00000202031	1	8	1	4	4	0
ENSG00000281859	0	0	0	0	0	0
ENSG00000207421	0	0	0	0	0	0
ENSG00000234093	1	3	3	6	5	4
ENSG00000142959	7	6	12	16	18	11
ENSG00000173846	973	1002	1300	1177	1241	1317
ENSG00000188396	26	40	31	50	52	50
ENSG00000222009	308	353	473	517	563	524
ENSG00000117425	7	11	9	8	12	14
ENSG00000202444	0	0	0	0	0	0
ENSG00000226499	0	3	4	2	0	1
ENSG00000070785	939	990	1292	923	1057	1007
ENSG00000253039	0	0	2	0	0	0
ENSG00000229815	0	0	0	0	0	2
ENSG00000232369	1	1	1	3	0	2
ENSG00000268949	3	3	7	2	1	0
ENSG00000126107	1654	1690	2097	1843	1791	1789
ENSG00000126088	2496	2504	3108	2544	2595	2687
ENSG00000162415	1	2	4	1	6	5
ENSG00000234315	0	0	0	0	0	0
ENSG00000281912	18	14	12	25	15	17
ENSG00000186603	439	413	570	350	387	378
ENSG00000132781	1079	1093	1380	1117	1136	1139
ENSG00000132773	436	430	609	464	504	522
ENSG00000070759	299	294	340	284	351	325
ENSG00000236872	1	0	2	0	2	0
ENSG00000280670	88	91	119	96	91	89
ENSG00000132763	648	622	897	583	553	585
ENSG00000117450	17204	16414	20841	16327	17399	17241
ENSG00000234379	0	0	0	0	0	0
ENSG00000117448	1825	1852	2439	1816	1843	1908
ENSG00000281133	1	1	0	0	2	0
ENSG00000280836	0	3	6	1	1	2
ENSG00000132780	8388	8017	10186	8256	8449	8619
ENSG00000281112	0	0	0	1	0	1
ENSG00000281825	0	0	0	0	0	0
ENSG00000159588	62	71	91	83	87	77
ENSG00000159592	4460	4668	5628	5009	4972	4884
ENSG00000225447	22	18	17	13	18	17
ENSG00000234329	18	17	28	28	14	21
ENSG00000159596	1674	1733	2282	1846	1805	1792
ENSG00000197429	871	807	998	878	906	847
ENSG00000230896	64	56	71	71	58	44
ENSG00000236111	0	1	0	0	0	0
ENSG00000086015	2399	2669	3443	2839	2877	2770
ENSG00000232467	0	0	3	1	0	0
ENSG00000117461	1040	993	1308	996	995	1045
ENSG00000278139	0	0	0	0	0	0
ENSG00000226957	2	0	0	2	1	0
ENSG00000233114	0	0	1	0	0	0
ENSG00000227857	4	1	6	11	4	4
ENSG00000117472	4410	4381	5844	4453	4679	4646
ENSG00000250719	0	0	0	1	0	0
ENSG00000085998	2506	2626	3441	2961	3028	3024
ENSG00000171357	257	238	267	224	218	258
ENSG00000085999	1275	1377	1670	1465	1422	1469
ENSG00000132128	2692	2730	3487	2859	3046	2777
ENSG00000173660	7756	7651	10321	7631	8394	8199
ENSG00000117481	1159	1176	1485	1302	1293	1239
ENSG00000225779	0	0	1	0	0	0
ENSG00000117480	47	50	34	40	35	30
ENSG00000232022	10	11	16	15	7	15
ENSG00000224863	0	0	1	1	0	0
ENSG00000197587	2	1	3	1	2	1
ENSG00000282881	0	0	0	0	0	0
ENSG00000269956	31	29	41	37	34	34
ENSG00000162456	0	0	0	0	0	0
ENSG00000079277	1736	1668	2207	1876	1966	1959
ENSG00000142961	1020	1027	1287	1167	1206	1177
ENSG00000123472	1509	1617	2009	1562	1722	1601
ENSG00000233647	0	4	6	5	0	5
ENSG00000186118	3	6	6	6	7	4
ENSG00000228237	6	8	7	17	19	14
ENSG00000159658	3660	3764	4651	3971	3959	3891
ENSG00000236476	0	0	0	0	0	0
ENSG00000142973	19	11	16	18	9	13
ENSG00000154198	0	0	0	0	0	0
ENSG00000238145	0	0	0	1	0	0
ENSG00000187048	0	0	1	0	0	0
ENSG00000259832	0	0	0	0	0	0
ENSG00000261196	0	0	0	0	0	0
ENSG00000261593	0	0	0	0	0	0
ENSG00000261290	0	0	0	0	0	0
ENSG00000186377	4	11	16	18	11	14
ENSG00000186160	2	4	11	7	1	6
ENSG00000225154	0	0	0	1	0	0
ENSG00000225506	80	75	99	86	95	107
ENSG00000162365	3	1	5	3	3	4
ENSG00000225514	0	0	0	1	1	0
ENSG00000224805	23	30	29	25	26	19
ENSG00000162366	10	14	17	25	28	32
ENSG00000162367	0	2	0	0	0	2
ENSG00000226252	0	0	0	0	0	0
ENSG00000123473	2365	2240	2966	2582	2611	2458
ENSG00000162368	4613	4776	5640	5060	5173	5033
ENSG00000225762	3	2	1	4	6	3
ENSG00000186790	0	3	4	3	3	1
ENSG00000237424	133	127	154	152	143	137
ENSG00000186564	70	62	99	81	88	87
ENSG00000271355	0	0	0	0	0	0
ENSG00000229554	0	0	0	0	0	0
ENSG00000227883	0	1	0	0	0	0
ENSG00000227947	0	0	0	0	0	0
ENSG00000269113	0	0	1	0	0	0
ENSG00000223814	0	0	0	0	0	0
ENSG00000225028	0	0	0	0	0	0
ENSG00000226133	0	0	0	0	0	0
ENSG00000231413	0	0	0	0	0	0
ENSG00000237180	0	0	0	0	0	0
ENSG00000242267	0	0	0	0	0	0
ENSG00000279096	0	0	0	0	0	0
ENSG00000223720	0	0	0	0	0	0
ENSG00000117834	2	1	1	0	0	1
ENSG00000272491	0	1	1	0	1	0
ENSG00000279214	0	0	0	0	0	0
ENSG00000132122	118	121	131	140	138	141
ENSG00000224986	0	0	0	0	2	0
ENSG00000206700	0	0	0	0	0	0
ENSG00000235105	1	1	0	0	0	0
ENSG00000223175	0	0	0	0	0	0
ENSG00000232514	0	0	0	0	0	0
ENSG00000186094	0	0	0	0	0	0
ENSG00000162373	0	0	0	0	0	0
ENSG00000229846	0	0	0	0	0	0
ENSG00000230114	0	0	0	0	0	0
ENSG00000225623	0	0	0	0	0	0
ENSG00000237478	0	0	0	0	0	0
ENSG00000215887	0	0	0	0	0	0
ENSG00000279324	0	0	0	0	0	0
ENSG00000233595	0	0	0	0	0	0
ENSG00000162374	0	0	0	0	0	0
ENSG00000230828	0	0	0	0	0	0
ENSG00000237337	0	0	0	0	0	0
ENSG00000233407	0	0	0	0	0	0
ENSG00000234080	0	0	1	0	0	0
ENSG00000229316	0	0	0	0	0	0
ENSG00000225671	0	0	0	0	0	1
ENSG00000142700	0	0	0	0	0	0
ENSG00000185104	1781	1836	2494	1920	1889	1866
ENSG00000225767	2	0	3	1	0	1
ENSG00000207194	3	0	0	0	0	0
ENSG00000230585	3	1	5	5	4	8
ENSG00000237130	0	0	0	0	0	0
ENSG00000123080	355	412	506	310	355	367
ENSG00000265538	0	0	0	0	0	0
ENSG00000275816	0	0	0	0	0	0
ENSG00000204006	0	0	0	0	0	0
ENSG00000200262	0	0	0	0	0	0
ENSG00000213478	0	0	0	0	0	0
ENSG00000203356	0	0	2	0	0	0
ENSG00000123091	3036	2968	3860	3249	3384	3497
ENSG00000233406	3	6	1	8	3	3
ENSG00000236434	1	3	3	2	0	1
ENSG00000085831	63	74	88	89	101	69
ENSG00000261664	1	0	1	1	1	2
ENSG00000085832	1830	1967	2303	2266	2144	2035
ENSG00000232027	5	5	5	0	7	8
ENSG00000206595	0	0	1	1	0	1
ENSG00000238140	4	1	2	1	3	2
ENSG00000227070	12	4	16	8	6	21
ENSG00000252032	0	0	0	0	0	0
ENSG00000227742	1	0	1	0	1	1
ENSG00000117859	4755	4779	5655	5168	5076	4992
ENSG00000236973	0	1	1	0	0	0
ENSG00000232846	0	1	0	1	2	2
ENSG00000212624	1	0	0	0	0	0
ENSG00000078618	8955	8966	10992	9783	9409	9347
ENSG00000266993	27	30	31	42	37	36
ENSG00000272175	0	1	0	1	2	1
ENSG00000230604	2	0	0	1	3	1
ENSG00000169213	4165	4340	5694	5204	5035	4860
ENSG00000200839	0	0	1	0	2	0
ENSG00000229032	0	0	0	1	0	0
ENSG00000264613	0	0	0	0	0	0
ENSG00000117862	2645	2695	3463	3079	3130	2911
ENSG00000198841	283	349	404	325	335	368
ENSG00000223390	3	3	3	1	3	5
ENSG00000228369	3	3	0	5	8	9
ENSG00000134717	2285	2270	2822	2462	2477	2524
ENSG00000157077	1730	1768	2270	2166	2110	2017
ENSG00000241745	0	1	1	1	0	0
ENSG00000228407	8	7	17	19	12	19
ENSG00000223429	0	2	1	2	1	3
ENSG00000224255	2	0	0	5	0	0
ENSG00000236004	0	0	1	1	0	0
ENSG00000237663	0	3	0	0	1	0
ENSG00000213735	1	0	1	0	0	0
ENSG00000154222	1687	1678	2068	1802	1840	2020
ENSG00000272100	6	5	10	10	9	4
ENSG00000224680	7	4	9	3	10	6
ENSG00000085840	1066	1013	1488	1081	1152	1145
ENSG00000134748	1900	1872	2318	1914	1982	1972
ENSG00000134744	2739	2547	3144	2826	2720	2853
ENSG00000272371	0	0	2	0	1	1
ENSG00000236290	0	2	0	0	0	0
ENSG00000116157	8	8	24	7	12	9
ENSG00000182183	36	37	61	38	37	49
ENSG00000162377	1836	1745	2193	1819	1778	1722
ENSG00000233664	0	0	0	0	0	0
ENSG00000239640	0	0	0	0	0	0
ENSG00000162378	1520	1576	1870	1738	1744	1598
ENSG00000252018	1	1	0	0	0	0
ENSG00000228929	11	12	10	12	8	8
ENSG00000206627	4	0	2	0	0	3
ENSG00000203995	577	532	725	605	577	554
ENSG00000242391	8	4	7	10	8	12
ENSG00000121310	1736	1832	2271	2115	2172	1998
ENSG00000230953	30	28	42	42	39	60
ENSG00000231866	0	0	0	0	1	2
ENSG00000116171	3092	3127	3747	3133	3174	3241
ENSG00000264834	0	0	2	0	0	0
ENSG00000266188	0	0	0	0	0	1
ENSG00000265815	0	0	1	0	0	0
ENSG00000237279	0	0	0	0	0	0
ENSG00000236360	0	5	1	2	2	2
ENSG00000226147	1	0	0	0	3	0
ENSG00000279054	0	0	1	1	0	0
ENSG00000174348	0	0	0	0	0	0
ENSG00000232993	0	0	0	0	0	0
ENSG00000227644	0	0	0	0	0	0
ENSG00000162383	0	0	0	0	0	0
ENSG00000235563	0	0	0	0	0	0
ENSG00000277397	0	0	1	0	0	0
ENSG00000157184	851	899	1200	926	956	912
ENSG00000236723	8	8	9	10	11	13
ENSG00000162384	1076	976	1237	984	1100	979
ENSG00000259818	4	3	7	4	3	2
ENSG00000162385	2372	2296	2914	2280	2575	2456
ENSG00000226754	28	19	28	29	29	31
ENSG00000157193	1568	1575	2142	1871	1747	1721
ENSG00000234578	2	1	2	0	2	1
ENSG00000228838	2	0	6	1	4	2
ENSG00000225030	4	1	0	1	1	1
ENSG00000232762	9	13	8	10	7	3
ENSG00000225675	3	0	3	5	8	5
ENSG00000226938	0	0	0	0	0	0
ENSG00000230138	0	0	0	0	0	0
ENSG00000236253	0	0	0	0	0	0
ENSG00000143006	4	4	3	8	1	3
ENSG00000174332	0	0	0	2	3	0
ENSG00000239007	0	0	0	0	0	0
ENSG00000058804	2668	2698	3447	2733	2668	2707
ENSG00000201003	0	1	2	0	3	3
ENSG00000229687	2	0	0	1	0	0
ENSG00000058799	882	816	1122	1035	1001	981
ENSG00000211452	13	8	18	16	10	10
ENSG00000081870	1340	1270	1826	1561	1496	1494
ENSG00000116212	2759	2784	3804	3014	3206	3068
ENSG00000219102	12	3	11	8	6	10
ENSG00000203985	1	1	0	0	1	0
ENSG00000116209	4049	4007	5102	4457	4682	4482
ENSG00000280378	6	2	9	10	6	7
ENSG00000116205	715	786	950	857	820	824
ENSG00000225183	0	0	1	1	0	0
ENSG00000279049	0	0	0	0	0	0
ENSG00000256407	2	2	0	0	3	0
ENSG00000157211	0	0	1	0	0	0
ENSG00000280425	0	1	1	0	0	1
ENSG00000215883	228	200	272	205	208	189
ENSG00000116221	3575	3593	4847	3649	3864	3906
ENSG00000157216	1299	1368	1830	1404	1508	1531
ENSG00000198711	16	29	31	25	16	30
ENSG00000225632	0	0	0	0	0	0
ENSG00000232245	0	0	0	0	0	0
ENSG00000235741	7	5	7	6	9	5
ENSG00000237173	1	0	0	0	0	0
ENSG00000227453	0	0	1	0	0	0
ENSG00000162390	530	533	653	639	599	583
ENSG00000162391	17	31	27	36	36	29
ENSG00000230728	1	0	0	0	0	0
ENSG00000184313	1	1	1	3	3	4
ENSG00000271723	0	0	0	1	0	0
ENSG00000243725	406	374	458	348	360	428
ENSG00000162396	263	285	368	298	256	292
ENSG00000006555	631	685	983	669	763	800
ENSG00000237453	3	2	1	2	0	2
ENSG00000162398	12	7	3	2	5	7
ENSG00000116133	23581	23849	31643	26074	25901	25542
ENSG00000242396	60	66	60	52	53	49
ENSG00000233203	17	23	32	22	27	21
ENSG00000143001	62	66	97	42	99	71
ENSG00000233271	0	0	0	0	0	0
ENSG00000162399	0	0	0	0	0	0
ENSG00000169174	12294	12864	16691	13600	14179	14321
ENSG00000162402	4908	4689	6211	5493	5113	5135
ENSG00000231090	0	0	0	0	0	0
ENSG00000231095	0	3	0	0	0	0
ENSG00000265822	0	0	0	1	0	0
ENSG00000231900	0	0	0	0	0	0
ENSG00000232198	0	0	0	0	0	0
ENSG00000199831	0	0	0	0	0	0
ENSG00000252162	0	0	0	0	0	0
ENSG00000272051	0	0	0	0	0	0
ENSG00000234810	0	0	0	0	0	0
ENSG00000230250	0	0	0	0	0	0
ENSG00000227104	0	0	0	0	0	0
ENSG00000233079	0	0	0	0	0	0
ENSG00000235612	0	0	0	0	0	0
ENSG00000229871	0	0	0	0	0	0
ENSG00000260971	0	0	0	0	0	0
ENSG00000223956	0	2	0	1	0	0
ENSG00000162407	133	161	190	176	147	184
ENSG00000236776	0	0	0	0	0	0
ENSG00000224980	0	0	0	0	0	0
ENSG00000225475	0	1	1	0	0	0
ENSG00000162409	41	28	46	55	50	42
ENSG00000187889	1	2	2	0	0	1
ENSG00000229913	0	0	0	0	0	0
ENSG00000157131	0	0	0	0	0	0
ENSG00000021852	0	0	0	0	0	0
ENSG00000236341	0	0	0	0	0	0
ENSG00000173406	1	0	0	0	1	1
ENSG00000227935	0	0	0	0	0	0
ENSG00000236888	0	0	0	0	0	0
ENSG00000226759	0	0	0	0	0	0
ENSG00000229887	0	0	1	0	2	0
ENSG00000223416	0	2	1	0	0	0
ENSG00000235038	0	0	0	0	0	0
ENSG00000230546	0	0	0	0	0	0
ENSG00000233216	0	0	1	0	0	0
ENSG00000162600	631	651	742	597	636	569
ENSG00000270209	0	0	0	0	0	0
ENSG00000264128	0	0	0	0	0	0
ENSG00000184292	11490	11274	15048	12408	12992	12600
ENSG00000185839	9	11	2	11	8	4
ENSG00000162601	1743	1655	1955	1952	1871	1816
ENSG00000283445	38	55	52	63	66	67
ENSG00000177606	1996	2063	2482	2266	2269	2365
ENSG00000234807	15	17	24	26	21	17
ENSG00000272226	3	4	0	5	5	5
ENSG00000231740	1	2	2	1	0	0
ENSG00000232453	12	17	23	22	14	21
ENSG00000237352	7	8	10	9	11	23
ENSG00000228121	0	0	0	0	0	1
ENSG00000241042	0	1	0	0	0	1
ENSG00000235215	0	0	0	2	0	2
ENSG00000224609	1	0	0	1	1	0
ENSG00000270457	0	0	0	1	0	0
ENSG00000172456	401	336	492	382	416	402
ENSG00000266150	0	0	0	0	0	0
ENSG00000226883	0	2	2	1	1	5
ENSG00000134709	2233	2186	2710	2591	2484	2285
ENSG00000134716	89	115	154	103	106	115
ENSG00000265535	0	0	0	0	0	0
ENSG00000162598	0	0	0	0	0	0
ENSG00000229332	0	0	0	0	0	0
ENSG00000238242	0	0	0	0	0	0
ENSG00000226476	239	204	266	351	307	293
ENSG00000231252	0	0	0	0	1	0
ENSG00000162599	1139	1168	1475	1183	1255	1239
ENSG00000237928	0	0	0	0	0	0
ENSG00000270742	3	5	1	3	0	2
ENSG00000237853	1	1	1	3	1	0
ENSG00000223920	1	0	0	0	0	0
ENSG00000162604	839	796	1076	876	1015	944
ENSG00000271200	1	3	3	4	5	2
ENSG00000132849	3482	3651	4531	4299	4322	4155
ENSG00000200575	1	0	1	0	0	2
ENSG00000212360	1	0	1	1	0	1
ENSG00000236646	0	0	0	2	0	2
ENSG00000242860	0	0	0	1	0	0
ENSG00000263908	0	0	0	0	0	0
ENSG00000283690	0	0	0	0	0	0
ENSG00000234204	0	0	0	0	0	0
ENSG00000234088	0	0	0	0	0	0
ENSG00000240563	90	75	101	95	87	101
ENSG00000237227	0	0	0	0	0	0
ENSG00000200174	0	0	0	0	0	0
ENSG00000132854	92	77	79	114	108	136
ENSG00000201153	0	0	0	0	0	0
ENSG00000162607	4021	3988	4635	4349	4436	4344
ENSG00000116641	2359	2485	3015	2811	2611	2653
ENSG00000270549	0	1	1	0	1	0
ENSG00000132855	4	2	3	2	5	1
ENSG00000278967	8	3	3	3	5	3
ENSG00000213703	0	0	0	0	1	1
ENSG00000235545	5	6	11	7	5	7
ENSG00000125703	617	644	772	622	692	656
ENSG00000234318	0	0	0	1	0	5
ENSG00000237163	0	0	0	0	0	0
ENSG00000229537	0	0	0	0	0	0
ENSG00000227485	0	0	0	0	0	0
ENSG00000229225	0	0	0	0	0	0
ENSG00000203605	0	0	0	0	0	0
ENSG00000224209	2	2	1	1	2	6
ENSG00000252259	0	0	0	0	0	0
ENSG00000228734	0	0	1	0	0	0
ENSG00000223683	0	1	0	0	0	0
ENSG00000230798	0	0	0	0	0	0
ENSG00000187140	0	0	0	0	0	1
ENSG00000275836	0	0	0	0	0	0
ENSG00000252784	0	0	0	0	0	0
ENSG00000236674	0	0	0	0	0	0
ENSG00000088035	582	654	769	687	640	607
ENSG00000142856	1503	1543	1748	1697	1617	1561
ENSG00000203965	364	386	441	383	338	352
ENSG00000264271	0	0	0	0	0	0
ENSG00000251720	1	0	0	0	3	0
ENSG00000116652	37	35	31	36	27	34
ENSG00000276884	0	0	0	0	0	0
ENSG00000278287	0	0	0	0	0	0
ENSG00000277565	0	0	0	0	0	0
ENSG00000275823	0	0	0	0	0	0
ENSG00000277689	0	0	0	0	0	0
ENSG00000274199	0	0	0	0	0	0
ENSG00000079739	4105	4205	5646	4897	5274	5002
ENSG00000244256	14	7	9	15	9	10
ENSG00000185483	63	63	72	67	64	72
ENSG00000177452	0	0	0	0	0	0
ENSG00000228056	0	0	0	0	0	1
ENSG00000207190	0	0	0	0	0	0
ENSG00000200508	0	0	0	0	0	0
ENSG00000223949	1	0	0	1	0	1
ENSG00000177414	0	0	0	0	0	0
ENSG00000238653	0	0	0	0	0	0
ENSG00000158966	315	310	440	375	363	322
ENSG00000264470	0	0	0	0	0	0
ENSG00000162437	995	972	1281	1111	1017	1042
ENSG00000162434	4192	4315	5462	5252	5144	5018
ENSG00000234784	0	0	0	0	0	0
ENSG00000233877	0	0	0	0	0	1
ENSG00000226891	0	2	2	2	2	0
ENSG00000185031	0	0	0	0	0	1
ENSG00000272506	0	1	0	0	0	0
ENSG00000212257	1	0	0	0	0	0
ENSG00000265996	0	0	0	3	4	0
ENSG00000199135	0	0	0	0	1	3
ENSG00000231485	0	0	1	1	0	0
ENSG00000235804	0	0	0	0	0	0
ENSG00000234496	0	0	0	0	0	0
ENSG00000162433	4040	4015	4847	4381	4336	4280
ENSG00000231622	2	0	0	0	1	0
ENSG00000116675	254	253	311	294	258	248
ENSG00000229294	0	1	0	0	0	4
ENSG00000234144	0	0	0	0	0	0
ENSG00000222624	0	0	0	0	0	0
ENSG00000213625	1827	1874	2266	2099	2252	2007
ENSG00000116678	281	310	345	349	298	304
ENSG00000237852	2	1	2	1	1	4
ENSG00000224570	1	0	0	0	0	1
ENSG00000239319	0	0	0	0	0	0
ENSG00000184588	0	1	0	1	0	0
ENSG00000227466	0	0	0	0	0	0
ENSG00000223152	0	0	0	0	0	0
ENSG00000118473	2	3	0	1	1	0
ENSG00000264720	0	0	0	0	0	0
ENSG00000248458	0	0	0	0	0	0
ENSG00000152760	0	0	0	2	1	0
ENSG00000172410	0	0	0	0	0	1
ENSG00000152763	78	101	87	91	87	78
ENSG00000231080	0	0	0	0	0	0
ENSG00000198160	2448	2347	2707	2659	2518	2416
ENSG00000116704	1084	1119	1386	1129	1061	1207
ENSG00000203963	2	2	4	0	0	2
ENSG00000252433	0	0	0	0	0	0
ENSG00000275678	0	2	2	0	1	0
ENSG00000162594	0	0	1	1	3	0
ENSG00000253074	0	0	0	0	0	0
ENSG00000252116	0	0	0	0	0	0
ENSG00000228523	0	0	0	0	0	0
ENSG00000081985	1259	1209	1714	1244	1255	1161
ENSG00000142864	22082	21807	26500	21724	22634	22488
ENSG00000223263	1	1	1	3	0	2
ENSG00000235200	0	0	2	1	0	0
ENSG00000207504	0	0	0	0	0	0
ENSG00000238139	0	0	0	0	0	0
ENSG00000242482	0	0	0	0	0	0
ENSG00000232048	0	0	0	0	0	0
ENSG00000116717	2909	2945	3410	3333	3684	3608
ENSG00000172380	8171	7950	9679	8814	8795	8731
ENSG00000238778	0	0	1	2	0	0
ENSG00000232284	36	52	56	35	31	45
ENSG00000235055	2	0	1	2	0	0
ENSG00000162595	3	3	3	2	6	3
ENSG00000228431	0	1	0	0	0	0
ENSG00000116729	3720	3590	4582	3537	3788	3666
ENSG00000234383	15	9	14	13	11	15
ENSG00000221203	1	2	0	3	0	1
ENSG00000229133	1	0	0	0	1	1
ENSG00000225242	0	0	0	0	0	0
ENSG00000237622	0	0	0	1	0	0
ENSG00000229440	1	0	0	0	0	0
ENSG00000116745	0	0	0	0	1	0
ENSG00000024526	3484	3333	4001	3713	3553	3469
ENSG00000233589	68	67	86	67	56	48
ENSG00000234264	18	13	17	10	9	11
ENSG00000225167	0	0	1	0	0	0
ENSG00000223883	0	0	0	0	0	0
ENSG00000235446	0	0	0	0	0	0
ENSG00000229639	0	0	0	0	0	0
ENSG00000033122	72	43	52	83	81	63
ENSG00000270615	0	0	0	0	0	0
ENSG00000240692	0	0	0	0	0	0
ENSG00000229359	0	0	0	0	0	0
ENSG00000237919	0	0	0	0	0	0
ENSG00000066557	1366	1338	1545	1460	1499	1410
ENSG00000244389	0	0	0	0	0	0
ENSG00000116754	7831	7899	9552	8863	8870	9226
ENSG00000228988	0	0	1	0	0	0
ENSG00000118454	928	978	1122	861	929	968
ENSG00000197568	310	263	408	277	330	321
ENSG00000226088	7	6	8	2	6	5
ENSG00000279230	7	7	3	2	2	1
ENSG00000116761	345	339	445	368	440	380
ENSG00000278636	0	0	0	0	0	0
ENSG00000271992	4	3	11	5	10	4
ENSG00000233020	0	0	1	0	0	0
ENSG00000237033	0	0	0	0	0	0
ENSG00000229051	0	0	0	0	0	0
ENSG00000226208	0	0	0	0	0	0
ENSG00000050628	2	0	1	0	1	2
ENSG00000235782	0	0	0	0	0	0
ENSG00000269933	0	0	0	0	0	0
ENSG00000235079	2	4	2	3	4	2
ENSG00000132485	4328	4308	5055	4987	4577	4707
ENSG00000207721	14	26	18	28	19	19
ENSG00000229956	11	11	6	14	5	15
ENSG00000226324	0	0	0	0	0	0
ENSG00000172260	6	7	4	8	13	9
ENSG00000231985	0	0	0	0	0	0
ENSG00000271618	0	0	0	0	0	0
ENSG00000228853	0	0	0	0	0	0
ENSG00000233994	2	2	2	4	1	4
ENSG00000227207	0	0	0	0	0	0
ENSG00000212366	0	0	0	0	0	0
ENSG00000225087	0	1	1	0	0	0
ENSG00000227016	0	0	0	0	0	0
ENSG00000280317	0	0	0	0	0	0
ENSG00000229636	0	0	0	0	0	0
ENSG00000251825	0	0	0	0	0	1
ENSG00000233973	0	0	0	0	0	0
ENSG00000223479	0	0	0	0	0	0
ENSG00000200601	0	0	0	0	0	0
ENSG00000252005	0	0	0	0	0	0
ENSG00000162620	160	124	149	122	140	128
ENSG00000254685	708	669	742	722	693	674
ENSG00000259030	20	18	20	20	15	15
ENSG00000116783	0	0	1	1	4	1
ENSG00000237324	0	0	2	0	0	0
ENSG00000233894	0	0	0	0	0	0
ENSG00000162621	0	0	0	0	0	0
ENSG00000178965	3	0	3	1	5	1
ENSG00000234497	0	0	0	0	0	0
ENSG00000272864	0	4	2	4	2	4
ENSG00000116791	2522	2441	2861	2468	2536	2540
ENSG00000162623	1251	1223	1487	1293	1364	1294
ENSG00000229943	0	0	0	0	0	0
ENSG00000261213	0	0	0	0	0	0
ENSG00000224127	0	0	0	0	0	0
ENSG00000162624	0	0	0	0	0	0
ENSG00000224149	0	0	0	0	0	0
ENSG00000206999	0	0	0	0	0	0
ENSG00000137968	28	26	18	29	39	36
ENSG00000224493	0	0	0	0	0	0
ENSG00000252338	0	0	0	0	0	0
ENSG00000213579	0	0	0	0	0	0
ENSG00000230863	0	1	0	0	0	0
ENSG00000178193	0	2	0	2	0	0
ENSG00000117054	1534	1474	1761	1488	1518	1462
ENSG00000181227	9	19	13	20	15	15
ENSG00000137955	2742	2666	3107	2815	2726	2823
ENSG00000206620	0	0	0	0	0	0
ENSG00000207241	0	0	0	0	0	0
ENSG00000201487	0	0	0	0	0	0
ENSG00000057468	14	6	9	7	8	3
ENSG00000154007	0	0	0	1	0	0
ENSG00000225605	1	0	0	0	1	0
ENSG00000230027	0	0	0	0	0	0
ENSG00000184005	3	4	0	3	4	4
ENSG00000223905	0	0	0	0	0	0
ENSG00000272855	0	0	0	0	0	0
ENSG00000226415	54	50	82	58	68	70
ENSG00000199921	0	0	0	0	0	0
ENSG00000237552	0	0	0	0	0	0
ENSG00000117069	123	147	185	119	141	134
ENSG00000276081	0	0	1	0	1	0
ENSG00000230498	6	4	5	4	3	6
ENSG00000142892	1444	1350	1734	1469	1519	1581
ENSG00000226084	73	73	109	92	121	85
ENSG00000228187	0	0	0	1	0	0
ENSG00000154027	20	45	40	22	19	19
ENSG00000233099	0	0	0	0	0	0
ENSG00000251767	0	0	0	0	0	0
ENSG00000036549	2076	2007	2377	2269	2095	2029
ENSG00000251785	0	0	0	0	1	0
ENSG00000243437	0	0	0	0	0	1
ENSG00000077254	2151	2087	2697	2531	2379	2372
ENSG00000232672	0	0	0	0	0	0
ENSG00000180488	938	936	1126	1186	1083	1068
ENSG00000222849	3	5	5	3	4	13
ENSG00000219201	39	33	25	38	30	39
ENSG00000235613	1	2	3	0	5	0
ENSG00000232015	0	0	0	0	0	0
ENSG00000235927	6	21	11	11	14	5
ENSG00000162614	119	124	144	135	127	133
ENSG00000162613	7598	7143	9134	7651	7474	7417
ENSG00000162616	1600	1563	1684	1456	1480	1450
ENSG00000137960	118	107	124	111	128	131
ENSG00000273338	18	13	22	12	14	17
ENSG00000213561	0	0	0	1	1	7
ENSG00000251958	0	0	0	0	0	0
ENSG00000213560	0	0	0	4	0	1
ENSG00000202263	0	0	2	0	0	0
ENSG00000233333	0	0	0	0	0	0
ENSG00000237413	2	0	0	0	0	0
ENSG00000122420	2	2	2	1	0	0
ENSG00000227556	0	0	0	0	0	0
ENSG00000212308	0	0	0	0	0	0
ENSG00000137959	132	144	263	339	233	240
ENSG00000137965	847	821	1130	1072	1018	1081
ENSG00000238015	0	0	0	0	5	0
ENSG00000235400	0	2	0	0	0	0
ENSG00000162618	0	0	1	0	0	0
ENSG00000230787	0	0	1	1	1	0
ENSG00000235011	0	0	0	0	0	0
ENSG00000282898	0	0	0	0	0	0
ENSG00000232676	0	0	0	0	0	0
ENSG00000235756	0	0	0	0	0	0
ENSG00000260322	0	0	0	0	0	0
ENSG00000277670	0	0	0	0	0	0
ENSG00000236407	0	0	0	0	0	0
ENSG00000225598	0	0	0	0	0	0
ENSG00000213559	0	0	0	0	0	0
ENSG00000227062	0	0	0	0	0	0
ENSG00000234108	0	0	0	0	0	0
ENSG00000224326	0	0	0	0	0	0
ENSG00000234184	0	0	0	0	0	0
ENSG00000227937	0	0	0	0	0	0
ENSG00000229752	0	0	0	0	0	0
ENSG00000235089	0	0	0	0	0	0
ENSG00000223026	0	0	0	0	0	0
ENSG00000117114	36	51	45	44	43	55
ENSG00000224494	0	0	0	0	0	0
ENSG00000227288	2	0	3	1	0	2
ENSG00000227960	0	0	0	0	0	0
ENSG00000234953	0	0	0	0	0	0
[truncated: 56,144 more rows]

## Sheet: Supplementary Data 3
Gene	Ect-bEV-ctrl-MM-3	Ect-bEV-ctrl-MM-2	Ect-bEV-ctrl-MM-1	Ect-bEV-MM-3	Ect-bEV-MM-2	Ect-bEV-MM-1
ENSG00000223972	0	0	0	0	0	0
ENSG00000227232	112	136	146	102	105	104
ENSG00000278267	10	9	7	13	12	11
ENSG00000243485	1	2	1	0	0	0
ENSG00000237613	0	0	0	0	0	0
ENSG00000268020	0	0	0	0	0	0
ENSG00000240361	0	0	0	0	1	0
ENSG00000186092	0	0	0	0	0	0
ENSG00000238009	7	9	9	3	1	3
ENSG00000239945	0	0	0	0	0	0
ENSG00000233750	34	26	32	23	20	21
ENSG00000268903	106	108	134	112	102	82
ENSG00000269981	178	184	251	195	167	170
ENSG00000239906	2	6	9	0	2	1
ENSG00000241860	25	23	22	13	15	22
ENSG00000222623	0	0	4	1	0	0
ENSG00000241599	0	0	0	0	0	0
ENSG00000279928	3	1	2	0	6	0
ENSG00000279457	225	225	255	264	190	188
ENSG00000273874	1	0	0	1	0	0
ENSG00000228463	19	9	13	11	9	12
ENSG00000241670	0	0	0	0	0	0
ENSG00000236679	0	1	0	0	0	0
ENSG00000236743	0	0	1	0	0	0
ENSG00000236601	0	2	3	1	1	2
ENSG00000237094	12	27	35	27	19	22
ENSG00000269732	0	0	0	0	0	0
ENSG00000278566	0	0	0	0	0	0
ENSG00000224813	0	0	0	0	0	0
ENSG00000233653	0	0	0	0	0	0
ENSG00000250575	0	0	0	2	0	0
ENSG00000278757	0	0	1	1	0	0
ENSG00000230021	0	5	1	2	1	2
ENSG00000235146	0	0	0	0	0	0
ENSG00000225972	3	7	3	6	3	4
ENSG00000225630	1754	1643	1457	1716	1597	1836
ENSG00000237973	624	557	480	609	610	692
ENSG00000278791	0	0	0	0	0	0
ENSG00000229344	19	12	11	20	19	16
ENSG00000240409	8	9	9	8	7	10
ENSG00000248527	14188	14150	10569	15921	13890	18275
ENSG00000198744	21	16	23	8	9	13
ENSG00000268663	0	0	0	0	0	0
ENSG00000273547	0	0	0	0	0	0
ENSG00000283574	0	3	0	0	2	0
ENSG00000229376	5	5	5	6	2	5
ENSG00000228327	250	289	280	219	167	212
ENSG00000223181	0	0	0	0	0	0
ENSG00000229905	0	0	2	2	0	2
ENSG00000237491	34	31	29	34	34	31
ENSG00000230092	7	11	9	20	11	11
ENSG00000177757	19	9	4	9	13	11
ENSG00000228794	349	302	291	335	284	333
ENSG00000225880	30	22	27	16	20	14
ENSG00000230368	0	0	0	0	0	0
ENSG00000234711	0	0	0	0	1	0
ENSG00000283040	0	0	0	0	0	0
ENSG00000272438	8	11	6	6	8	2
ENSG00000230699	10	27	13	14	5	14
ENSG00000241180	0	2	1	1	0	1
ENSG00000223764	5	6	5	5	3	4
ENSG00000187634	41	36	30	43	25	31
ENSG00000188976	5577	5287	5916	5124	4511	4544
ENSG00000187961	629	668	662	676	545	543
ENSG00000187583	472	467	469	548	503	513
ENSG00000187642	279	268	245	306	250	237
ENSG00000272512	14	23	35	25	14	24
ENSG00000188290	782	554	558	878	724	762
ENSG00000187608	660	645	565	885	736	915
ENSG00000231702	1	0	0	1	1	0
ENSG00000224969	2	4	3	2	1	2
ENSG00000188157	24199	22847	25249	26811	23359	23086
ENSG00000242590	0	0	0	0	0	0
ENSG00000217801	255	299	286	487	350	368
ENSG00000273443	84	110	103	146	126	127
ENSG00000237330	58	49	68	98	82	86
ENSG00000131591	617	544	600	601	483	536
ENSG00000223823	0	0	0	0	0	0
ENSG00000207730	6	5	5	7	13	3
ENSG00000207607	18	13	14	9	12	8
ENSG00000198976	10	8	13	11	4	6
ENSG00000272141	55	66	48	55	37	55
ENSG00000205231	5	7	3	6	6	4
ENSG00000162571	13	11	22	17	20	16
ENSG00000186891	68	64	83	52	54	43
ENSG00000186827	0	1	1	2	3	2
ENSG00000078808	5111	4491	4985	5323	4573	4634
ENSG00000176022	561	479	600	550	495	447
ENSG00000184163	52	51	61	68	36	59
ENSG00000260179	7	11	14	7	9	6
ENSG00000160087	1927	1664	1808	1980	1697	1676
ENSG00000230415	21	31	22	19	27	27
ENSG00000162572	72	59	49	65	48	82
ENSG00000131584	2083	1986	2121	1987	1646	1645
ENSG00000278073	0	0	0	0	0	0
ENSG00000169972	593	591	651	640	528	536
ENSG00000127054	3110	3050	3339	3201	2631	2727
ENSG00000240731	112	111	139	107	95	92
ENSG00000224051	1444	1343	1517	1640	1330	1359
ENSG00000169962	66	83	104	76	49	60
ENSG00000107404	5020	4648	5291	5299	4375	4349
ENSG00000162576	625	609	602	639	542	514
ENSG00000175756	3714	3211	3695	3769	3507	3329
ENSG00000223663	0	0	0	1	1	1
ENSG00000221978	3958	3833	3970	4087	3293	3417
ENSG00000224870	751	681	772	801	685	629
ENSG00000242485	2116	1777	1806	1836	1617	1608
ENSG00000264293	0	0	0	0	0	0
ENSG00000272455	64	71	62	74	44	55
ENSG00000235098	418	438	476	462	412	379
ENSG00000225905	37	27	30	33	21	33
ENSG00000205116	3	1	0	0	1	0
ENSG00000225285	1	1	5	4	2	8
ENSG00000179403	1128	1029	1133	1260	1053	1127
ENSG00000215915	72	47	63	64	47	62
ENSG00000160072	2535	2433	2663	2715	2157	2115
ENSG00000197785	1992	1883	1984	1932	1718	1700
ENSG00000205090	54	33	48	60	47	47
ENSG00000160075	4246	3623	4015	4392	3701	3882
ENSG00000215014	15	21	13	25	8	18
ENSG00000279244	0	0	0	0	0	0
ENSG00000274481	0	0	0	0	0	0
ENSG00000228594	948	861	1091	876	742	836
ENSG00000272106	47	47	53	45	66	62
ENSG00000197530	2083	1978	2243	2248	1938	1908
ENSG00000189409	8	14	30	25	12	18
ENSG00000248333	2429	2240	2517	2580	2227	2205
ENSG00000272004	5	3	4	4	5	6
ENSG00000189339	1725	1697	1799	1878	1471	1579
ENSG00000269737	57	49	60	50	49	57
ENSG00000215914	0	0	2	1	1	1
ENSG00000008128	663	647	756	672	573	595
ENSG00000268575	99	107	101	101	115	91
ENSG00000227775	149	144	144	120	97	146
ENSG00000215790	198	192	198	180	168	168
ENSG00000008130	2140	2051	2164	2240	1881	1855
ENSG00000078369	18130	16095	18143	19312	17799	18952
ENSG00000231050	42	32	22	29	37	34
ENSG00000169885	12	12	13	21	10	16
ENSG00000178821	71	74	72	70	59	49
ENSG00000142609	1	5	2	1	1	7
ENSG00000233542	0	0	1	0	0	0
ENSG00000187730	0	2	4	0	1	0
ENSG00000226969	0	1	2	3	1	3
ENSG00000067606	1559	1543	1652	1787	1558	1575
ENSG00000271806	10	18	8	14	26	5
ENSG00000182873	126	116	129	162	137	128
ENSG00000162585	1038	1023	1100	1200	965	994
ENSG00000234396	0	1	2	1	1	3
ENSG00000157933	2426	2233	2366	2285	1987	2134
ENSG00000116151	257	284	268	248	234	224
ENSG00000272161	0	2	1	2	0	1
ENSG00000269896	33	29	36	24	21	24
ENSG00000272420	6	5	3	4	2	6
ENSG00000157916	3445	3113	3369	3666	3084	3023
ENSG00000157911	921	907	987	918	812	759
ENSG00000149527	4413	4473	4803	4675	3865	3924
ENSG00000224387	20	30	28	32	26	23
ENSG00000229393	37	33	36	33	20	24
ENSG00000157881	1213	1104	1303	1221	1022	1090
ENSG00000197921	7	8	10	9	5	6
ENSG00000272449	32	27	27	35	32	20
ENSG00000238164	20	25	36	21	23	29
ENSG00000157873	247	229	258	304	204	282
ENSG00000225931	0	1	0	0	0	0
ENSG00000228037	0	1	0	0	4	0
ENSG00000157870	1447	1256	1454	1367	1167	1218
ENSG00000142606	1	0	3	0	0	1
ENSG00000237058	0	0	0	0	0	0
ENSG00000215912	15	20	17	14	16	18
ENSG00000283259	0	0	0	0	0	0
ENSG00000233234	0	0	0	0	0	0
ENSG00000231630	0	0	0	0	0	1
ENSG00000169717	0	0	0	0	0	0
ENSG00000177133	0	0	0	0	1	0
ENSG00000142611	4	8	9	11	5	6
ENSG00000283572	0	0	0	0	0	0
ENSG00000226286	0	0	0	0	0	0
ENSG00000279839	1	0	0	0	0	1
ENSG00000272235	0	0	0	0	0	0
ENSG00000130762	1407	1231	1611	1567	1343	1352
ENSG00000272088	1	0	1	0	1	1
ENSG00000162591	507	534	674	527	445	443
ENSG00000207776	0	0	0	0	0	0
ENSG00000238260	8	17	15	12	5	11
ENSG00000158109	1660	1475	1714	1895	1542	1566
ENSG00000116213	643	729	700	636	617	540
ENSG00000078900	162	170	177	109	109	106
ENSG00000227589	2	1	3	6	4	1
ENSG00000235131	0	2	0	1	0	0
ENSG00000227372	1591	1588	1574	1506	1434	1458
ENSG00000276189	0	0	0	0	0	0
ENSG00000162592	4	4	2	3	4	0
ENSG00000235169	77	60	74	67	71	89
ENSG00000130764	2319	1975	2117	2174	2020	1865
ENSG00000266075	3	0	1	1	1	2
ENSG00000272153	45	38	44	47	30	25
ENSG00000116198	1510	1405	1508	1471	1275	1321
ENSG00000169598	258	255	275	189	197	178
ENSG00000198912	1194	1089	1280	1311	1110	1152
ENSG00000236423	50	71	58	74	59	50
ENSG00000233304	0	0	0	0	0	0
ENSG00000226374	0	1	0	0	0	0
ENSG00000229280	0	0	0	0	0	0
ENSG00000235054	0	0	0	0	0	0
ENSG00000227169	0	0	0	0	0	0
ENSG00000232596	0	0	0	0	0	0
ENSG00000196581	226	223	249	270	250	209
ENSG00000231510	0	0	0	0	0	0
ENSG00000260972	0	0	0	0	0	0
ENSG00000283356	0	0	0	0	0	0
ENSG00000236948	0	0	0	1	0	1
ENSG00000264341	0	0	0	0	0	0
ENSG00000264101	2	2	0	1	0	1
ENSG00000131697	1062	1059	1030	1067	866	949
ENSG00000069424	523	484	569	598	559	507
ENSG00000116254	38	58	66	37	40	29
ENSG00000116251	19001	16942	16537	18701	17426	17348
ENSG00000226944	5	6	4	8	7	2
ENSG00000158286	582	591	621	716	609	618
ENSG00000116237	4419	3928	4463	4335	3885	3838
ENSG00000225077	53	38	51	64	52	44
ENSG00000173673	1	0	0	0	0	0
ENSG00000158292	3182	2863	3184	2905	2660	2686
ENSG00000097021	6163	5597	6348	5945	5291	5264
ENSG00000271746	0	0	0	0	0	0
ENSG00000069812	1655	1571	1733	1309	1184	1178
ENSG00000187017	971	846	820	761	594	687
ENSG00000265392	1	0	3	2	1	0
ENSG00000231868	18	15	14	17	11	13
ENSG00000215788	1285	1403	1317	1569	1245	1188
ENSG00000171680	3126	3231	3218	3256	2977	2985
ENSG00000162408	1164	1039	1142	1062	888	943
ENSG00000253022	0	1	0	0	1	2
ENSG00000229519	9	13	14	6	11	8
ENSG00000173662	3	3	0	2	1	3
ENSG00000204859	726	695	722	700	617	549
ENSG00000162413	1627	1446	1547	1694	1540	1526
ENSG00000116273	1985	1752	1857	1895	1700	1654
ENSG00000041988	386	401	430	417	312	341
ENSG00000007923	2649	2396	2598	2338	2063	2195
ENSG00000228750	0	1	0	0	0	0
ENSG00000237436	9	5	1	6	7	7
ENSG00000171735	1779	1445	1572	1787	1631	1466
ENSG00000227950	0	0	1	0	0	0
ENSG00000237365	0	0	0	0	0	0
ENSG00000207056	0	0	0	0	0	0
ENSG00000237402	0	0	1	1	0	0
ENSG00000237728	0	0	0	0	0	0
ENSG00000225126	0	0	0	0	0	0
ENSG00000270171	0	0	0	0	0	0
ENSG00000270035	0	0	0	0	0	0
ENSG00000269978	0	0	1	0	0	0
ENSG00000049245	3852	3434	3958	4014	3491	3516
ENSG00000269925	25	22	34	20	34	27
ENSG00000049246	234	241	242	189	166	190
ENSG00000236266	8	9	6	9	2	4
ENSG00000049247	0	1	0	0	0	0
ENSG00000049249	33	27	18	87	72	59
ENSG00000270330	0	0	0	0	0	0
ENSG00000116288	8523	7377	7796	8130	7534	7162
ENSG00000200344	9	8	5	8	7	1
ENSG00000116285	16394	15076	15895	17119	15426	15978
ENSG00000238290	51	55	56	56	44	58
ENSG00000232848	3	1	3	2	1	1
ENSG00000229305	2	2	5	3	0	5
ENSG00000227634	7	4	9	1	1	4
ENSG00000200975	0	0	0	0	0	0
ENSG00000233645	1	0	0	5	0	1
ENSG00000251977	0	0	0	0	0	0
ENSG00000162426	96	104	90	112	85	95
ENSG00000252254	0	0	4	0	1	0
ENSG00000142599	3292	3210	3342	3133	3000	3210
ENSG00000232912	0	1	1	2	3	5
ENSG00000221083	0	0	0	0	0	0
ENSG00000270282	0	0	5	0	2	0
ENSG00000234619	0	1	0	0	0	2
ENSG00000224315	5	7	1	0	1	0
ENSG00000222511	0	1	1	0	0	1
ENSG00000226545	1	0	2	4	3	0
ENSG00000228423	4	3	2	5	1	1
ENSG00000229716	0	0	0	0	0	0
ENSG00000074800	103298	95303	106742	114751	101794	104306
ENSG00000274258	7	2	0	4	5	3
ENSG00000236269	46	64	49	74	44	62
ENSG00000230679	8	11	7	7	9	2
ENSG00000201725	0	0	1	1	0	2
ENSG00000238249	0	0	1	2	2	0
ENSG00000232208	0	0	0	0	0	0
ENSG00000232663	0	0	0	0	0	0
ENSG00000131686	0	0	1	1	0	0
ENSG00000265141	0	0	0	0	0	0
ENSG00000197241	0	0	0	0	0	0
ENSG00000142583	74	84	74	42	32	44
ENSG00000252404	0	1	1	0	0	0
ENSG00000180758	492	429	502	454	427	424
ENSG00000228526	206	226	205	212	169	173
ENSG00000234546	95	75	109	122	113	79
ENSG00000281937	2	5	7	6	8	9
ENSG00000049239	1827	1876	1917	1753	1542	1564
ENSG00000171621	842	757	795	1069	885	989
ENSG00000252956	0	0	0	0	0	0
ENSG00000235263	0	0	0	0	0	0
ENSG00000171612	309	263	269	269	190	216
ENSG00000231181	6	4	2	9	8	5
ENSG00000188807	646	571	687	545	448	469
ENSG00000171608	1264	1269	1399	1843	1594	1675
ENSG00000179840	0	0	0	0	0	0
ENSG00000233268	0	0	0	0	0	0
ENSG00000231789	18	25	19	10	12	14
ENSG00000171603	17768	16370	17554	16721	15156	15489
ENSG00000271264	1	0	0	0	0	0
ENSG00000280113	9	11	4	14	11	2
ENSG00000178585	3589	3260	3389	3216	3059	3141
ENSG00000223989	0	0	0	0	0	0
ENSG00000162441	1757	1624	1750	1562	1448	1574
ENSG00000228150	47	33	30	49	45	41
ENSG00000173614	712	695	710	701	631	673
ENSG00000202415	3	14	15	5	13	12
ENSG00000283611	6	2	7	3	1	2
ENSG00000265521	0	3	1	1	0	1
ENSG00000241326	0	0	0	0	0	0
ENSG00000162444	31	28	25	40	26	28
ENSG00000130939	3267	3231	3356	3001	2738	2879
ENSG00000224340	0	0	1	0	0	1
ENSG00000233623	4	3	2	2	2	2
ENSG00000201746	2	1	5	3	0	1
ENSG00000054523	6581	6142	6385	5840	5633	5866
ENSG00000264881	0	0	0	0	0	0
ENSG00000199562	5	8	4	2	0	3
ENSG00000264501	0	0	0	0	0	0
ENSG00000142657	8804	8055	8901	8995	8181	8217
ENSG00000271989	4	1	1	6	0	1
ENSG00000251503	35	32	29	49	31	41
ENSG00000175279	398	313	341	337	319	291
ENSG00000241563	7	7	9	10	1	9
ENSG00000160049	4767	4282	4623	4239	3771	3922
ENSG00000203469	0	0	0	0	0	0
ENSG00000142655	946	959	1051	1171	980	957
ENSG00000243267	0	0	1	1	0	2
ENSG00000130940	543	556	539	501	484	487
ENSG00000272078	41	33	30	24	26	24
ENSG00000225158	0	1	0	0	0	0
ENSG00000175262	0	5	3	1	4	10
ENSG00000215785	0	5	0	0	0	0
ENSG00000120948	7001	6355	6557	6772	5956	6048
ENSG00000277726	0	0	0	0	0	0
ENSG00000009724	57	45	52	45	29	36
ENSG00000271895	50	30	36	47	36	19
ENSG00000116649	2722	2483	2815	2471	2053	2199
ENSG00000171824	4328	4064	4660	4199	3983	4191
ENSG00000226849	31	13	37	31	17	19
ENSG00000230337	26	19	27	23	26	34
ENSG00000198793	5235	4876	5192	4319	4305	4232
ENSG00000225602	0	3	0	4	0	0
ENSG00000253086	0	0	0	0	0	0
ENSG00000171819	0	4	3	4	1	0
ENSG00000207451	2	0	0	0	0	0
ENSG00000238173	0	0	0	0	0	0
ENSG00000120942	690	597	746	649	573	526
ENSG00000238199	3	2	2	0	0	1
ENSG00000224338	0	0	0	0	0	0
ENSG00000204624	671	625	697	652	656	597
ENSG00000235643	50	40	36	63	56	49
ENSG00000116661	5549	5030	5446	6801	5654	5574
ENSG00000132879	1145	1194	1163	1244	1130	1018
ENSG00000116663	331	292	374	343	336	343
ENSG00000116670	1606	1435	1675	1751	1477	1436
ENSG00000162490	5	1	5	3	3	2
ENSG00000177674	2185	2098	2325	2729	2290	2365
ENSG00000215910	2	0	1	0	3	0
ENSG00000177553	0	0	0	0	0	0
ENSG00000177000	784	734	881	998	857	915
ENSG00000011021	1052	1043	1045	985	972	1025
ENSG00000242349	50	61	49	62	29	37
ENSG00000276470	0	0	0	0	0	0
ENSG00000278852	0	0	0	0	0	0
ENSG00000175206	24	19	10	15	10	13
ENSG00000275915	0	0	0	0	0	0
ENSG00000120937	0	0	1	1	0	0
ENSG00000224904	0	0	0	0	1	0
ENSG00000199347	1	0	0	5	1	1
ENSG00000201801	0	0	1	2	1	2
ENSG00000116685	2378	2208	2510	2338	2047	2187
ENSG00000083444	11099	10677	11795	11016	9556	9847
ENSG00000116688	9909	9144	9968	8815	8550	8448
ENSG00000270914	0	1	0	1	0	1
ENSG00000116691	1241	1074	1356	1425	1132	1162
ENSG00000202461	4	10	10	6	11	3
ENSG00000276869	0	0	0	0	2	0
ENSG00000243539	0	0	0	0	0	0
ENSG00000120949	568	602	640	491	406	410
ENSG00000201135	1	0	0	1	0	0
ENSG00000227875	0	0	0	1	0	0
ENSG00000028137	94	56	103	140	123	122
ENSG00000263676	0	0	0	0	0	0
ENSG00000225196	0	0	0	0	0	0
ENSG00000252969	0	0	0	0	0	0
ENSG00000048707	4406	4160	4323	3790	3685	3709
ENSG00000239149	29	15	19	9	7	9
ENSG00000229484	0	0	0	0	0	1
ENSG00000162496	598	623	637	955	821	863
ENSG00000221340	3	1	3	1	4	5
ENSG00000276830	0	0	0	3	0	3
ENSG00000272482	6	5	9	6	8	11
ENSG00000204518	0	0	0	0	2	0
ENSG00000226166	0	0	0	0	0	0
ENSG00000188984	0	0	0	0	0	0
ENSG00000157330	0	0	0	0	0	0
ENSG00000116726	0	0	2	0	0	0
ENSG00000116721	0	0	2	0	0	0
ENSG00000228338	0	0	0	0	0	0
ENSG00000239810	0	0	0	0	0	0
ENSG00000231103	0	0	0	0	0	0
ENSG00000179172	2	0	1	0	0	0
ENSG00000120952	0	0	1	0	0	0
ENSG00000243073	0	0	0	0	0	0
ENSG00000187545	0	0	0	0	0	0
ENSG00000204510	0	0	0	0	0	0
ENSG00000207434	0	0	0	0	0	0
ENSG00000234064	0	0	0	0	0	0
ENSG00000232423	0	0	0	0	0	0
ENSG00000274178	0	0	0	0	0	0
ENSG00000274764	0	0	0	0	0	0
ENSG00000229571	0	0	0	0	0	0
ENSG00000277058	0	0	0	0	0	0
ENSG00000277862	0	0	0	0	0	0
ENSG00000236179	0	0	0	0	0	0
ENSG00000275774	0	0	0	0	0	0
ENSG00000229978	0	0	0	0	0	0
ENSG00000233336	0	0	0	0	0	0
ENSG00000280267	0	0	0	0	0	0
ENSG00000179412	0	0	0	0	0	0
ENSG00000204505	0	0	0	0	0	0
ENSG00000279169	0	0	0	0	0	0
ENSG00000279804	0	0	0	0	0	0
ENSG00000250894	0	0	0	0	0	0
ENSG00000270601	0	0	0	0	0	0
ENSG00000231219	0	0	0	0	0	0
ENSG00000207511	0	0	0	0	0	0
ENSG00000182330	0	0	0	0	0	0
ENSG00000204501	0	0	0	0	0	0
ENSG00000237700	0	0	0	0	0	0
ENSG00000228229	0	0	0	0	0	0
ENSG00000204481	0	0	0	0	0	0
ENSG00000204480	0	0	0	0	0	0
ENSG00000204479	0	0	0	0	0	0
ENSG00000204478	0	0	2	0	0	0
ENSG00000162494	0	0	0	2	6	5
ENSG00000259961	0	0	0	0	0	0
ENSG00000215909	0	0	0	0	0	0
ENSG00000162493	902	729	915	1076	914	982
ENSG00000222952	0	0	0	0	0	0
ENSG00000237445	0	0	0	2	0	0
ENSG00000253085	0	0	0	0	0	0
ENSG00000116731	2262	2028	2066	1886	1790	1984
ENSG00000189337	517	488	542	453	392	415
ENSG00000252151	0	0	0	0	0	0
ENSG00000231606	0	0	1	1	1	1
ENSG00000234593	1	0	6	2	1	1
ENSG00000235829	0	0	0	0	0	0
ENSG00000175147	118	118	107	117	118	119
ENSG00000171729	1135	1062	1214	1263	1184	1175
ENSG00000204464	2	8	4	16	11	5
ENSG00000215720	1	2	2	5	0	0
ENSG00000278480	2	0	0	0	0	0
ENSG00000142621	33	38	34	31	36	34
ENSG00000233485	1	1	0	2	1	0
ENSG00000236045	0	2	3	2	2	1
ENSG00000228140	9	9	6	12	14	9
ENSG00000142634	6376	5394	5729	7968	7031	7166
ENSG00000162438	3	0	2	1	0	0
ENSG00000142615	0	0	1	0	0	0
ENSG00000215704	3	3	3	2	0	1
ENSG00000132906	371	339	398	395	314	348
ENSG00000116138	951	870	893	833	693	746
ENSG00000251866	0	1	0	0	2	0
ENSG00000272510	4	0	0	2	1	1
ENSG00000116771	617	557	641	508	416	450
ENSG00000237301	8	15	12	10	6	5
ENSG00000235084	20	24	15	15	18	21
ENSG00000252417	0	0	0	0	0	1
ENSG00000236500	0	0	0	0	0	0
ENSG00000197312	2865	2464	2681	2112	2168	2129
ENSG00000215695	0	0	0	0	0	0
ENSG00000271742	1	3	2	0	1	1
ENSG00000116786	3666	3326	3732	3655	3222	3271
ENSG00000237938	38	48	58	41	31	32
ENSG00000162461	53	53	68	69	57	67
ENSG00000224459	6	2	1	7	3	6
ENSG00000162460	1	1	3	3	5	0
ENSG00000162458	6743	6523	7226	8272	7118	7307
ENSG00000224321	34	18	23	41	32	38
ENSG00000233954	188	218	140	229	196	204
ENSG00000178715	0	1	4	1	1	2
ENSG00000179743	159	159	196	201	156	194
ENSG00000065526	5336	4978	5078	4046	4364	4435
ENSG00000270620	0	1	0	1	0	0
ENSG00000116809	1038	1058	1254	1235	1104	1014
ENSG00000234607	2	1	0	3	0	0
ENSG00000231353	0	0	0	0	0	0
ENSG00000275503	0	0	0	0	0	0
ENSG00000224966	1	0	0	0	0	0
ENSG00000183888	0	0	0	0	0	0
ENSG00000233078	0	0	0	0	0	0
ENSG00000173641	1	2	2	1	3	5
ENSG00000186510	1	0	3	0	0	3
ENSG00000232456	7	2	3	1	2	6
ENSG00000184908	10	7	14	11	15	10
ENSG00000185519	105	92	124	109	77	67
ENSG00000142627	5583	5087	5484	6608	5707	5722
ENSG00000227959	47	29	39	61	37	37
ENSG00000224621	23	20	32	29	16	28
ENSG00000234166	0	0	0	0	0	0
ENSG00000142632	2090	2017	2258	1908	1666	1642
ENSG00000237276	201	148	201	188	183	182
ENSG00000132881	235	244	219	224	212	185
ENSG00000233929	4	3	2	3	2	3
ENSG00000037637	914	856	931	993	979	945
ENSG00000055070	7068	6629	7104	6818	6537	6396
ENSG00000226457	5	7	1	4	4	4
ENSG00000187144	17	7	8	2	3	3
ENSG00000157191	2382	2149	2372	3348	3128	3135
ENSG00000226029	62	81	76	94	65	86
ENSG00000080947	345	317	352	334	308	323
ENSG00000206652	0	1	0	0	1	0
ENSG00000261135	10	14	7	1	3	11
ENSG00000224174	0	0	0	3	0	0
ENSG00000233421	14	14	32	10	15	16
ENSG00000277344	0	0	0	0	0	0
ENSG00000268991	0	0	0	0	0	0
ENSG00000225710	0	0	0	0	0	0
ENSG00000219481	819	693	808	680	697	709
ENSG00000271732	2	4	1	1	1	2
ENSG00000215908	895	864	947	847	694	719
ENSG00000186301	137	140	123	125	119	118
ENSG00000282143	0	0	0	0	0	0
ENSG00000207513	0	0	0	0	0	0
ENSG00000237847	0	0	0	0	0	0
ENSG00000280114	0	1	1	1	0	0
ENSG00000236698	64	60	67	37	42	52
ENSG00000268869	1	0	0	1	0	0
ENSG00000279151	0	0	0	0	0	0
ENSG00000279132	0	0	0	0	0	0
ENSG00000282740	0	0	0	0	0	0
ENSG00000058453	1866	1697	1848	1566	1428	1324
ENSG00000227684	0	3	1	1	0	4
ENSG00000207389	2	0	0	0	0	0
ENSG00000186715	80	86	92	82	84	64
ENSG00000223643	0	0	0	0	0	0
ENSG00000230239	0	0	0	0	0	0
ENSG00000263811	0	0	0	0	0	0
ENSG00000228549	48	48	75	54	63	45
ENSG00000277234	0	0	0	0	0	0
ENSG00000238142	110	102	92	109	91	92
ENSG00000235241	75	60	83	83	79	84
ENSG00000207005	3	3	5	4	8	4
ENSG00000272426	3	1	1	4	3	3
ENSG00000117122	2113	1968	2247	2638	2343	2408
ENSG00000226526	10	5	3	14	8	8
ENSG00000159363	2602	2460	2791	3045	2675	2775
ENSG00000117118	2690	2421	2778	2731	2334	2385
ENSG00000117115	279	222	257	236	233	217
ENSG00000204362	29	34	41	50	47	38
ENSG00000282843	2	0	1	1	1	4
ENSG00000142623	483	502	524	414	315	337
ENSG00000142619	618	575	769	256	223	212
ENSG00000266634	0	0	4	2	0	0
ENSG00000159339	11	10	14	7	9	7
ENSG00000280226	0	0	0	0	0	0
ENSG00000276747	0	0	0	0	0	0
ENSG00000179051	14684	13502	13936	14734	13429	13255
ENSG00000227751	0	0	0	0	0	0
ENSG00000074964	658	647	754	717	679	618
ENSG00000236648	0	0	0	0	0	0
ENSG00000117148	6	10	14	6	6	5
ENSG00000261781	0	0	0	0	0	0
ENSG00000117154	1	0	0	0	0	0
ENSG00000280222	0	0	0	0	0	0
ENSG00000230035	0	0	0	0	0	0
ENSG00000225387	0	0	0	0	0	0
ENSG00000179023	1	1	1	0	0	2
ENSG00000235282	0	0	0	0	0	0
ENSG00000225478	0	0	0	0	0	0
ENSG00000009709	0	0	0	0	0	0
ENSG00000179002	0	0	0	0	1	0
ENSG00000255275	4	0	0	0	0	3
ENSG00000159423	536	429	562	411	337	361
ENSG00000265606	1	0	0	0	0	0
ENSG00000221662	0	0	0	0	0	0
ENSG00000169991	2062	1806	1822	1676	1537	1608
ENSG00000272084	9	18	14	7	9	16
ENSG00000127481	15286	14549	14923	12573	13277	13070
ENSG00000230424	19	23	20	15	23	7
ENSG00000127463	5346	4991	5420	4408	4212	4279
ENSG00000053372	2615	2456	2720	2514	2086	2114
ENSG00000211454	12	10	12	8	9	7
ENSG00000162482	61	49	74	44	41	38
ENSG00000270728	47	49	66	38	36	44
ENSG00000053371	1724	1596	1858	1760	1521	1620
ENSG00000200403	0	8	11	1	1	0
ENSG00000040487	579	520	598	722	600	530
ENSG00000077549	9777	8738	9662	10672	9265	9740
ENSG00000240490	2	1	0	0	0	0
ENSG00000201609	0	0	0	0	0	0
ENSG00000235185	0	4	0	0	0	0
ENSG00000173436	2638	2235	2697	2531	2217	2086
ENSG00000270136	4	0	3	2	3	5
ENSG00000226396	28	14	22	24	29	15
ENSG00000158747	1440	1259	1288	1820	1529	1597
ENSG00000158748	1	0	1	0	0	0
ENSG00000162542	614	548	634	578	526	536
ENSG00000178828	0	0	1	0	0	0
ENSG00000235434	0	1	0	0	0	0
ENSG00000169914	608	623	625	576	562	520
ENSG00000188784	0	0	0	0	0	0
ENSG00000242688	0	0	0	0	0	0
ENSG00000188257	0	0	0	0	0	1
ENSG00000127472	0	0	0	0	0	0
ENSG00000117215	0	0	0	0	0	1
ENSG00000158786	0	4	6	1	3	2
ENSG00000227066	3	1	8	1	1	2
ENSG00000187980	2	2	1	0	0	0
ENSG00000225986	0	0	0	0	0	0
ENSG00000162543	5	1	4	1	1	0
ENSG00000228105	0	0	0	0	0	0
ENSG00000158816	2	0	1	0	2	0
ENSG00000226664	0	1	0	0	0	0
ENSG00000236963	1	2	0	1	2	6
ENSG00000226487	0	0	0	0	0	0
ENSG00000162545	12042	9964	10617	9032	8263	8692
ENSG00000090432	1317	1128	1282	1259	1087	1134
ENSG00000215520	0	0	0	0	0	0
ENSG00000183114	23	15	22	20	20	13
ENSG00000158825	2421	2329	2538	3291	2806	2925
ENSG00000158828	1219	1067	1305	1322	1280	1280
ENSG00000117242	217	195	217	186	190	177
ENSG00000244038	8264	7774	8698	8812	8080	7799
ENSG00000117245	145	118	138	106	99	92
ENSG00000235432	1	1	2	1	0	0
ENSG00000189410	1699	1432	1616	1540	1275	1260
ENSG00000233069	3	7	7	7	6	3
ENSG00000127483	10145	9628	10327	8700	8244	8528
ENSG00000075151	5520	5215	5445	5204	4950	5227
ENSG00000251914	2	0	0	0	0	1
ENSG00000221808	1	0	0	0	0	0
ENSG00000233072	2	3	1	1	2	2
ENSG00000236073	1	2	0	0	0	0
ENSG00000235112	4	5	3	5	1	4
ENSG00000117298	5251	5058	5618	6281	5564	5539
ENSG00000236936	1	0	0	0	0	1
ENSG00000231105	11	9	18	26	18	17
ENSG00000236216	0	0	0	1	0	0
ENSG00000228823	0	0	0	0	0	0
ENSG00000236009	0	0	0	0	0	0
ENSG00000227001	26	12	22	20	18	20
ENSG00000187952	6	5	12	7	6	2
ENSG00000186543	0	0	0	0	1	1
ENSG00000142794	644	631	639	615	575	609
ENSG00000176378	3	4	1	0	2	1
ENSG00000162551	83	70	71	93	94	74
ENSG00000233431	0	0	0	0	0	0
ENSG00000076864	289	291	287	351	272	317
ENSG00000090686	3804	3423	3719	3375	3066	3076
ENSG00000231978	1	0	2	0	0	1
ENSG00000187942	55	39	49	63	35	34
ENSG00000142798	9698	9325	9746	8873	8980	8883
ENSG00000232037	1	0	0	1	0	4
ENSG00000283234	1	1	1	2	0	4
ENSG00000219073	1	1	1	0	0	1
ENSG00000273610	0	0	0	0	0	0
ENSG00000201919	0	0	0	0	0	0
ENSG00000142789	0	0	0	0	2	0
ENSG00000278124	0	0	0	0	0	0
ENSG00000201273	0	0	0	0	0	0
ENSG00000228397	18	12	12	19	6	5
ENSG00000218510	365	355	351	299	254	265
ENSG00000070831	15468	13913	15406	15387	14322	15046
ENSG00000230068	17	33	17	20	22	7
ENSG00000271428	11	7	13	16	7	10
ENSG00000271840	4	6	1	5	6	1
ENSG00000162552	99	107	114	191	129	167
ENSG00000266564	0	0	0	0	0	0
ENSG00000234397	0	0	0	0	0	0
ENSG00000279625	0	0	0	0	0	0
ENSG00000184677	1427	1306	1326	1198	1139	1274
ENSG00000237200	8	13	13	11	9	8
ENSG00000070886	4	10	4	4	2	4
ENSG00000276835	0	0	0	0	0	0
ENSG00000173372	0	1	0	0	0	0
ENSG00000159189	0	0	0	0	0	0
ENSG00000173369	0	0	0	0	0	0
ENSG00000133216	2099	1862	2077	2168	1879	1943
ENSG00000265422	0	1	0	0	0	0
ENSG00000225952	2	0	2	1	0	0
ENSG00000264014	0	0	0	0	0	0
ENSG00000215906	0	0	0	0	0	0
ENSG00000227868	9	9	6	7	4	5
ENSG00000004487	7522	7097	7479	6962	6012	6221
ENSG00000240553	1	0	1	0	0	1
ENSG00000263793	1	0	0	0	0	0
ENSG00000266802	0	0	2	0	1	0
ENSG00000169641	6364	5806	6157	6048	5941	6036
ENSG00000229010	7	4	1	2	0	0
ENSG00000206935	4	1	4	4	4	3
ENSG00000252578	4	4	2	6	0	0
ENSG00000179546	70	41	54	45	36	47
ENSG00000215381	0	0	0	0	0	0
ENSG00000261326	136	141	148	141	104	100
ENSG00000125944	11502	10132	10807	9605	9263	9104
ENSG00000125945	1687	1561	1712	1341	1194	1298
ENSG00000249087	145	125	146	130	119	126
ENSG00000201405	0	0	0	0	0	0
ENSG00000271420	1	1	3	2	2	0
ENSG00000204219	70	59	64	68	48	44
ENSG00000232482	0	2	0	1	0	0
ENSG00000088280	2589	2496	2682	2128	1802	1742
ENSG00000007968	282	251	270	232	238	237
ENSG00000235052	13	14	23	14	20	11
ENSG00000117318	2108	1983	2315	1510	1293	1372
ENSG00000197880	1	0	0	0	0	2
ENSG00000229239	0	0	2	2	0	0
ENSG00000142676	34705	30697	28532	34321	30492	30444
ENSG00000011007	2740	2529	2612	2384	2330	2371
ENSG00000236810	138	98	158	129	113	101
ENSG00000057757	1333	1162	1342	1250	1074	1071
ENSG00000011009	4145	3629	4307	4444	4013	4106
ENSG00000117308	2795	2651	2986	2779	2494	2480
ENSG00000117305	997	921	1045	1021	916	949
ENSG00000179163	625	573	637	590	505	565
ENSG00000188822	1	0	0	1	1	0
ENSG00000229106	0	0	0	0	0	2
ENSG00000232557	0	0	0	1	0	0
ENSG00000264926	0	0	0	0	0	0
ENSG00000230228	0	1	0	0	0	0
ENSG00000189266	4851	4276	4813	4500	4274	4136
ENSG00000188529	5110	4635	4809	4559	4218	4155
ENSG00000215905	0	0	1	0	0	0
ENSG00000225315	0	0	0	1	0	0
ENSG00000142661	9	9	6	21	16	17
ENSG00000230703	0	0	0	0	0	0
ENSG00000142677	363	308	381	394	333	427
ENSG00000185436	1455	1350	1481	1418	1229	1216
ENSG00000230023	5	5	4	4	4	3
ENSG00000232298	12	8	15	21	12	14
ENSG00000158055	713	692	724	626	562	610
ENSG00000001460	1052	1031	1202	1122	1034	1073
ENSG00000001461	2595	2375	2603	2269	2164	2278
ENSG00000117602	2114	1973	2169	2065	1952	1945
ENSG00000264443	1	0	0	0	0	0
ENSG00000184454	3	7	2	3	1	6
ENSG00000227312	0	0	0	0	0	0
ENSG00000239106	0	0	0	0	0	0
ENSG00000133226	5840	5416	5691	5128	4512	5056
ENSG00000169504	16755	14669	16240	17310	16838	17002
ENSG00000238482	1	0	0	0	0	0
ENSG00000020633	3	2	1	3	2	3
ENSG00000278034	0	0	0	0	0	0
ENSG00000229162	4	4	1	5	2	4
ENSG00000261025	0	0	0	0	0	0
ENSG00000264371	0	0	0	0	0	0
ENSG00000233755	0	0	0	0	0	0
ENSG00000233419	0	0	0	0	0	0
ENSG00000231953	0	0	0	0	0	0
ENSG00000117614	1904	1731	1886	2048	1925	1862
ENSG00000117616	1470	1412	1527	1580	1379	1245
ENSG00000272432	4	8	5	1	3	6
ENSG00000261349	21	14	15	15	15	18
ENSG00000187010	13	8	31	29	21	23
ENSG00000224183	3	2	3	2	3	3
ENSG00000259984	11	10	3	5	5	5
ENSG00000183726	3959	3260	3497	4089	3930	3934
ENSG00000188672	58	46	55	43	33	45
ENSG00000238084	1	1	4	2	0	1
ENSG00000204178	917	894	918	1012	990	1081
ENSG00000157978	2073	2010	2165	2023	1806	1762
ENSG00000225643	3	3	5	2	7	2
ENSG00000117643	31	16	41	15	12	6
ENSG00000233478	0	0	4	4	0	1
ENSG00000162430	3855	3760	4006	3491	3225	3380
ENSG00000255054	0	0	0	0	0	0
ENSG00000228172	39	30	24	28	36	25
ENSG00000117640	822	869	888	762	742	691
ENSG00000272478	0	0	0	0	0	0
ENSG00000127423	584	549	573	586	483	536
ENSG00000236528	6	4	6	6	5	5
ENSG00000182749	1877	1770	1915	1729	1518	1574
ENSG00000207302	1	0	3	0	0	0
ENSG00000117632	11058	10249	11497	12299	10605	10771
ENSG00000229786	1	4	1	2	0	2
ENSG00000223624	0	3	1	2	1	0
ENSG00000158006	694	649	691	609	556	651
ENSG00000207237	0	0	0	0	0	0
ENSG00000252190	0	0	0	0	0	0
ENSG00000252691	0	0	0	0	0	0
ENSG00000158008	24	36	27	33	24	25
ENSG00000158014	1	3	2	2	0	2
ENSG00000158022	1	1	3	3	5	3
ENSG00000175087	288	229	229	237	183	217
ENSG00000197245	5	3	12	3	2	6
ENSG00000282872	0	2	0	0	0	0
ENSG00000236782	16	20	15	22	12	14
ENSG00000142684	65	44	47	51	35	40
ENSG00000142675	878	816	906	969	831	781
ENSG00000188782	1	3	2	2	0	1
ENSG00000236155	1	0	0	0	0	0
ENSG00000278572	0	0	0	0	0	0
ENSG00000130695	2612	2550	2727	2174	1929	1966
ENSG00000270733	11	8	6	2	11	3
ENSG00000142669	8321	8160	8594	9398	8168	8795
ENSG00000158062	785	733	755	701	619	558
ENSG00000169442	8	8	4	3	1	1
ENSG00000176092	1265	1184	1330	1327	1121	1114
ENSG00000225854	5	2	8	4	2	1
ENSG00000176083	0	0	0	0	0	0
ENSG00000131914	10	4	6	5	3	4
ENSG00000117682	1141	1136	1171	1103	1096	1094
ENSG00000223583	1	3	0	1	2	3
ENSG00000225891	9	5	1	8	8	3
ENSG00000198830	17018	15392	18030	15483	14892	14637
ENSG00000224129	0	0	0	0	0	0
ENSG00000117676	4328	3918	4265	4682	4082	4047
ENSG00000238705	0	0	0	0	0	0
ENSG00000243905	0	0	0	0	0	0
ENSG00000252802	0	0	0	0	0	0
ENSG00000252429	0	0	0	0	0	0
ENSG00000229247	0	0	0	0	0	0
ENSG00000238316	0	0	0	0	0	0
ENSG00000235069	0	0	0	0	0	0
ENSG00000260063	45	42	63	33	30	37
ENSG00000117713	5213	4851	5018	4430	4267	4348
ENSG00000060642	879	821	936	833	787	710
ENSG00000241188	3	1	0	1	2	3
ENSG00000204160	1215	1193	1343	1436	1231	1237
ENSG00000175793	39616	35870	40395	50957	44377	45473
ENSG00000226698	0	0	0	0	0	0
ENSG00000142751	1220	1088	1237	1288	1095	1117
ENSG00000198746	671	594	647	630	579	548
ENSG00000090273	9413	8253	9384	9298	8288	8323
ENSG00000131910	15	23	7	12	9	12
ENSG00000175707	842	800	937	926	783	776
ENSG00000172746	5	1	6	5	2	6
ENSG00000224064	5	6	10	2	5	4
ENSG00000225294	4	9	8	6	4	1
ENSG00000253368	3534	2971	2912	3912	3379	3691
ENSG00000158246	1211	1179	1295	1177	946	1000
ENSG00000280403	1	2	0	4	0	0
ENSG00000090020	3609	3359	3789	4443	3944	4183
ENSG00000229985	0	0	0	0	0	0
ENSG00000214973	0	0	2	0	1	0
ENSG00000225159	14	4	12	6	8	3
ENSG00000225990	0	0	0	0	0	0
ENSG00000224311	0	0	0	0	0	0
ENSG00000142784	2337	2309	2386	2603	2187	2268
ENSG00000252098	0	1	0	1	1	0
ENSG00000243659	0	2	6	0	2	0
ENSG00000186501	694	701	793	717	651	651
ENSG00000206888	8	4	3	4	2	1
ENSG00000241547	17	20	19	10	7	11
ENSG00000142765	1133	1105	1285	965	749	743
ENSG00000142733	2175	2113	2321	2420	2073	2195
ENSG00000142748	13	4	5	11	10	5
ENSG00000174950	84	97	107	105	81	76
ENSG00000231207	0	0	1	1	1	1
ENSG00000181773	136	110	143	108	96	103
ENSG00000158195	11736	10884	11938	11029	10206	10669
ENSG00000241169	1	0	2	1	0	1
ENSG00000237429	1	3	10	0	2	4
ENSG00000126705	1936	1880	2054	1708	1549	1594
ENSG00000000938	14	8	15	7	11	15
ENSG00000235912	4	3	2	6	4	8
ENSG00000233975	2	1	0	0	1	1
ENSG00000126709	1362	1267	1048	1868	1847	1975
ENSG00000225886	8	8	8	8	14	13
ENSG00000206767	0	0	0	0	0	0
ENSG00000226662	0	0	0	0	0	0
ENSG00000207095	0	0	0	0	0	0
ENSG00000009780	548	444	517	495	402	433
ENSG00000231344	3	5	6	7	1	1
ENSG00000230833	1	0	0	0	0	2
ENSG00000117758	1014	994	1158	1136	948	1004
ENSG00000269971	0	1	0	2	1	0
ENSG00000270031	5	2	5	1	7	1
ENSG00000223062	1	0	0	0	0	0
ENSG00000117751	2166	2080	2341	2067	1759	1956
ENSG00000252947	2	3	3	3	2	0
ENSG00000278868	0	0	0	0	0	0
ENSG00000130775	535	531	634	688	532	658
ENSG00000117748	2809	2632	2795	2871	2482	2470
ENSG00000130768	380	371	390	424	313	324
ENSG00000227050	4	0	2	2	3	0
ENSG00000158156	347	284	320	327	253	287
ENSG00000158161	1893	1878	1929	1820	1539	1757
ENSG00000238231	1	2	4	0	1	2
ENSG00000240750	4	4	0	3	1	1
ENSG00000228589	37	24	36	36	31	35
ENSG00000228943	0	0	0	0	0	0
ENSG00000214812	1	0	0	0	0	0
ENSG00000253005	0	0	0	2	0	0
ENSG00000169403	2000	1898	2248	2883	2547	2756
ENSG00000126698	4612	4217	4691	4561	4086	4152
ENSG00000130770	4812	4145	4187	4935	4208	4068
ENSG00000270605	134	113	103	117	72	102
ENSG00000271398	8	9	9	7	9	9
ENSG00000130766	2113	2005	2314	3487	3112	3050
ENSG00000130772	950	851	945	970	771	824
ENSG00000204138	3103	2972	3266	2988	2649	2793
ENSG00000206779	0	0	3	1	0	0
ENSG00000229820	1	4	1	2	0	4
ENSG00000221216	2	4	4	0	0	1
ENSG00000180198	4942	4605	4911	4547	3876	4027
ENSG00000242125	1583	1418	1463	1318	1090	1160
ENSG00000274266	0	0	0	0	0	0
ENSG00000200087	53	30	65	53	17	25
ENSG00000231468	5	16	15	6	6	8
ENSG00000279443	81	76	80	55	46	55
ENSG00000180098	944	859	943	981	949	866
ENSG00000197989	717	641	605	652	569	581
ENSG00000221539	23	12	21	28	18	27
ENSG00000278274	0	0	0	0	0	0
ENSG00000273544	0	0	0	0	0	0
ENSG00000274582	0	0	0	0	0	0
ENSG00000280498	0	0	0	0	0	0
ENSG00000120656	1138	918	1122	1040	872	906
ENSG00000188060	13	7	11	27	19	19
ENSG00000229388	12	8	17	11	7	5
ENSG00000270103	0	0	0	0	0	0
ENSG00000274978	1	4	2	3	7	3
ENSG00000162419	972	800	966	951	822	889
ENSG00000252777	2	2	0	0	0	0
ENSG00000198492	3158	3042	3203	2808	2663	2733
ENSG00000116329	6	0	1	0	3	5
ENSG00000233427	0	0	1	0	0	0
ENSG00000199756	0	0	0	0	0	0
ENSG00000159023	1508	1433	1594	1740	1604	1659
ENSG00000225616	1	1	0	1	0	0
ENSG00000206704	0	0	0	0	0	0
ENSG00000277958	1	1	0	0	1	0
ENSG00000253304	986	826	945	989	844	936
ENSG00000225750	4	6	2	1	0	1
ENSG00000116350	7551	6938	7423	8007	7434	7120
ENSG00000277916	0	0	0	0	0	0
ENSG00000116353	671	622	635	564	505	503
ENSG00000237934	4	3	3	5	7	1
ENSG00000060656	2331	2101	2324	2049	1796	1842
ENSG00000230523	0	1	0	2	0	0
ENSG00000225011	0	0	0	0	0	0
ENSG00000228176	1	3	1	2	3	5
ENSG00000270927	0	0	0	0	0	0
ENSG00000233399	1	0	0	0	0	0
ENSG00000233372	0	0	0	0	0	0
ENSG00000231251	0	0	0	0	0	0
ENSG00000236335	0	0	0	0	0	0
ENSG00000231949	0	0	0	0	0	0
ENSG00000162510	23	19	17	17	20	17
ENSG00000186056	89	79	93	76	59	57
ENSG00000162511	17	26	33	51	29	34
ENSG00000264773	0	0	0	0	0	0
ENSG00000229607	0	0	0	0	0	0
ENSG00000223382	7	5	8	3	6	6
ENSG00000222784	0	0	0	0	0	0
ENSG00000235143	0	0	0	0	0	0
ENSG00000162512	3210	3133	3345	3048	2568	2762
ENSG00000266210	0	0	0	0	0	0
ENSG00000134644	6459	5920	6268	5180	5177	5296
ENSG00000237329	0	1	3	2	0	0
ENSG00000232768	1	0	1	1	0	1
ENSG00000215900	0	0	0	0	0	0
ENSG00000225142	0	0	0	0	0	0
ENSG00000084628	15	12	5	11	7	3
ENSG00000060688	2544	2216	2665	2417	2195	2120
ENSG00000229447	15	12	17	7	8	9
ENSG00000121766	1861	1750	1907	2131	1859	1829
ENSG00000229044	4	2	5	1	0	2
ENSG00000121769	68	48	74	73	78	45
ENSG00000168528	19371	18765	21173	19979	16715	17970
ENSG00000215899	0	0	0	0	0	0
ENSG00000206981	0	0	0	0	0	0
ENSG00000260386	1	1	0	2	5	1
ENSG00000265961	0	0	0	0	0	0
ENSG00000229167	62	39	38	43	31	32
ENSG00000142910	8188	7739	8882	7996	6991	7056
ENSG00000121764	3	1	3	3	5	8
ENSG00000162517	2223	2192	2374	2296	1963	1956
ENSG00000235790	61	66	60	65	71	52
ENSG00000264078	2	2	4	4	5	7
ENSG00000084636	4934	4920	5063	5357	4275	4443
ENSG00000121753	140	172	176	180	147	139
ENSG00000266580	0	0	1	0	0	1
ENSG00000254545	20	6	13	10	5	11
ENSG00000134668	735	775	803	840	688	680
ENSG00000203620	0	0	1	0	0	1
ENSG00000269967	4	4	5	5	3	2
ENSG00000184007	4216	3780	3623	4776	4145	4521
ENSG00000228634	12	13	10	8	6	9
ENSG00000121774	8692	7485	7921	8122	7490	7579
ENSG00000203325	10	3	7	9	6	4
ENSG00000121775	659	617	671	758	611	686
ENSG00000266203	1	0	1	1	0	0
ENSG00000276493	0	0	0	0	0	0
ENSG00000025800	5981	5353	5870	5402	4795	5138
ENSG00000250135	0	0	0	0	0	0
ENSG00000084652	4841	4360	4650	4487	4408	4097
ENSG00000160050	476	454	423	524	492	435
ENSG00000224066	9	5	9	8	10	11
ENSG00000160051	316	332	378	353	271	278
ENSG00000222046	14	5	8	11	4	7
ENSG00000160055	536	499	460	612	478	482
ENSG00000084623	8564	7771	9309	8806	8067	8080
ENSG00000220785	202	230	207	207	222	175
ENSG00000183615	57	62	70	104	60	67
ENSG00000182866	15	30	45	55	40	42
ENSG00000277617	0	0	0	0	0	0
ENSG00000252450	0	0	0	0	0	0
ENSG00000116478	8407	7621	8064	7898	7290	7021
ENSG00000175130	3331	3044	3372	3689	3089	3038
ENSG00000233775	0	1	0	0	0	0
ENSG00000162526	19	39	19	33	19	28
ENSG00000225828	84	100	114	103	87	74
ENSG00000160058	2863	2634	2917	2991	2828	2860
ENSG00000224333	0	1	0	0	0	0
ENSG00000270850	0	0	0	0	0	0
ENSG00000229259	0	0	0	0	0	0
ENSG00000263529	0	0	0	0	0	0
ENSG00000254553	0	1	0	0	0	1
ENSG00000273274	29	20	26	25	18	11
ENSG00000160062	517	464	468	496	444	438
ENSG00000176261	1107	910	883	990	952	871
ENSG00000200591	4	1	2	6	2	0
ENSG00000162521	8023	7483	8119	8237	7467	7309
ENSG00000162520	206	200	153	223	203	189
ENSG00000224409	19	25	25	28	27	27
ENSG00000162522	10870	9940	11081	10882	9806	10240
ENSG00000134684	6246	5815	6397	6816	5932	6204
ENSG00000116497	1886	1772	1855	1827	1765	1754
ENSG00000160097	20	13	16	13	17	13
ENSG00000121905	19	11	11	10	10	7
ENSG00000121900	1970	1835	2097	2166	1866	1821
ENSG00000116514	1667	1508	1566	2059	1929	1912
ENSG00000278966	2	3	0	0	2	0
ENSG00000217644	2	2	2	2	5	2
ENSG00000239670	3	0	4	8	7	2
ENSG00000236065	5	2	1	3	0	0
ENSG00000004455	10583	10106	10940	9987	9034	9158
ENSG00000276645	0	2	2	1	0	0
ENSG00000142920	199	188	239	192	205	140
ENSG00000278997	21	13	19	16	18	13
ENSG00000116525	465	406	547	432	342	384
ENSG00000279179	29	27	29	27	24	31
ENSG00000160094	955	870	961	832	605	742
ENSG00000270115	5	11	6	6	5	8
ENSG00000184389	32	27	23	25	9	18
ENSG00000225313	230	244	252	261	188	188
ENSG00000134686	3586	3480	3936	3978	3415	3696
ENSG00000222112	18	12	20	22	20	20
ENSG00000233246	16	9	17	19	11	10
ENSG00000234512	0	0	0	0	0	0
ENSG00000121903	206	220	229	207	221	221
ENSG00000235907	4	0	2	2	2	1
ENSG00000121904	1	2	2	3	4	6
ENSG00000227000	0	0	0	0	0	0
ENSG00000176256	0	0	0	0	0	0
ENSG00000231163	0	0	0	0	0	0
ENSG00000201148	0	0	0	0	0	0
ENSG00000142698	0	2	0	0	0	0
ENSG00000270241	0	0	0	0	0	0
ENSG00000207941	0	0	0	0	0	0
ENSG00000163866	1619	1361	1478	1665	1427	1428
ENSG00000189280	1509	1556	1674	1930	1597	1797
ENSG00000189433	412	389	429	699	556	646
ENSG00000255811	0	0	0	0	0	0
ENSG00000188910	5477	5022	5580	6841	5851	6018
ENSG00000187513	1	2	1	3	1	2
ENSG00000230163	43	44	45	31	30	26
ENSG00000116544	16	5	7	8	8	6
ENSG00000241014	112	103	117	126	115	113
ENSG00000271741	23	33	28	15	18	12
ENSG00000243749	286	270	314	321	321	313
ENSG00000163867	711	658	717	640	586	562
ENSG00000233940	0	0	0	0	0	0
ENSG00000197056	1512	1416	1592	1192	1098	1099
ENSG00000228348	2	0	0	0	0	0
ENSG00000116560	11353	10105	10609	9395	8487	8694
ENSG00000201868	1	0	0	0	1	0
ENSG00000146463	2764	2474	2581	2287	2189	2297
ENSG00000240374	0	0	0	0	0	0
ENSG00000201542	0	0	0	0	0	0
ENSG00000229994	3	6	0	9	4	5
ENSG00000227409	4	0	5	1	0	0
ENSG00000278702	0	0	0	0	0	0
ENSG00000142687	2122	2061	2242	2003	1870	1917
ENSG00000236274	0	0	0	0	1	0
ENSG00000020129	1395	1298	1359	1172	1071	1132
ENSG00000239636	7	5	5	2	2	6
ENSG00000116819	19	22	23	17	24	14
ENSG00000126067	6603	5965	6559	6439	5677	6067
ENSG00000142686	915	921	888	964	825	739
ENSG00000092853	2596	2322	2355	2566	2308	2265
ENSG00000232335	2	0	3	0	2	2
ENSG00000134698	937	916	956	1034	875	894
ENSG00000092847	2293	2136	2213	1841	1701	1733
ENSG00000271164	0	0	0	0	0	0
ENSG00000271914	0	0	0	0	0	0
ENSG00000126070	1431	1337	1381	1328	1184	1265
ENSG00000271554	4	4	4	0	3	6
ENSG00000232862	0	0	0	0	1	0
ENSG00000092850	1	0	2	4	0	2
ENSG00000116863	1175	1030	1050	1291	1206	1143
ENSG00000171812	143	141	150	189	164	141
ENSG00000054116	2726	2353	2547	2795	2476	2492
ENSG00000116871	14462	12736	13435	16914	15406	15313
ENSG00000264592	0	0	0	0	0	0
ENSG00000054118	8266	7345	7795	7038	6950	7010
ENSG00000231849	0	0	0	0	0	2
ENSG00000214193	2093	2366	2170	2405	2244	2198
ENSG00000142694	640	627	634	735	702	658
ENSG00000116883	839	856	804	1013	799	876
ENSG00000196182	799	745	849	950	778	779
ENSG00000181817	525	528	572	506	427	441
ENSG00000222821	0	0	0	0	0	0
ENSG00000116885	227	224	234	163	172	197
ENSG00000201448	5	0	3	4	1	1
ENSG00000116898	2579	2438	2532	2878	2378	2432
ENSG00000119535	1	0	0	0	0	0
ENSG00000230214	0	0	0	0	0	0
ENSG00000234481	0	0	0	0	0	0
ENSG00000163873	0	0	0	0	0	0
ENSG00000264698	0	0	0	0	0	0
ENSG00000207328	0	0	0	0	0	0
ENSG00000223944	0	0	0	0	0	0
ENSG00000252368	0	0	0	0	0	0
ENSG00000230451	0	0	0	0	0	0
ENSG00000233621	113	97	109	219	224	190
ENSG00000163874	989	1045	1085	2250	1968	1969
ENSG00000163875	2208	1998	2298	2218	2065	2036
ENSG00000263675	10	14	14	18	7	12
ENSG00000163877	925	897	907	893	814	814
ENSG00000232273	4	1	0	2	1	0
ENSG00000237749	0	2	0	0	0	0
ENSG00000163879	12	14	14	10	7	5
ENSG00000134697	3311	3024	3314	2894	2635	2856
ENSG00000169218	0	1	2	1	0	0
ENSG00000116922	937	798	904	757	683	694
ENSG00000134690	3480	3433	3722	3306	2871	3001
ENSG00000183317	1	1	2	1	0	1
ENSG00000200421	0	0	0	0	0	0
ENSG00000214141	0	0	0	0	0	0
ENSG00000227416	0	0	0	0	0	0
ENSG00000185090	459	396	452	366	264	299
ENSG00000233728	0	0	0	0	0	0
ENSG00000196449	622	532	601	598	491	581
ENSG00000197982	1143	1014	1083	1216	1081	1183
ENSG00000188786	1267	1198	1196	1192	1202	1220
ENSG00000235673	1	2	1	0	0	0
ENSG00000204084	551	512	516	509	464	449
ENSG00000230955	0	0	0	0	0	0
ENSG00000252448	0	3	2	0	2	0
ENSG00000222282	0	0	0	0	4	0
ENSG00000277168	0	0	0	0	0	0
ENSG00000183431	5022	4309	4908	4602	4256	4257
ENSG00000212541	12	17	14	11	13	8
ENSG00000183386	752	735	760	803	678	707
ENSG00000183520	1941	1684	1928	1767	1668	1643
ENSG00000185668	11	18	10	14	9	5
ENSG00000224592	1	3	5	2	0	0
ENSG00000223589	0	0	0	0	0	0
ENSG00000265596	0	0	0	0	0	0
ENSG00000237290	1	0	0	0	0	0
ENSG00000275350	0	0	0	0	0	0
ENSG00000200796	0	0	0	0	0	0
ENSG00000238063	0	0	0	0	0	0
ENSG00000215895	4	3	0	2	3	0
ENSG00000116954	1152	1048	1073	1392	1178	1211
ENSG00000273637	0	1	1	0	0	0
ENSG00000228436	18	6	6	20	19	15
ENSG00000214114	1211	1118	1215	1183	980	1032
ENSG00000274944	6	20	9	11	5	11
ENSG00000131233	4	0	1	1	0	0
ENSG00000158315	368	397	413	651	598	593
ENSG00000199963	0	1	0	0	0	0
ENSG00000207466	0	0	0	0	0	0
ENSG00000235549	0	0	0	0	0	0
ENSG00000174574	3520	3133	3497	3882	3335	3522
ENSG00000168653	4717	4278	4459	5013	4364	4316
ENSG00000127603	16123	15447	15118	14652	14486	15227
ENSG00000206654	0	0	1	1	0	3
ENSG00000222378	0	2	1	0	4	4
ENSG00000270040	2	0	0	1	4	0
ENSG00000226438	2	0	0	3	0	0
ENSG00000217897	0	1	1	0	1	0
ENSG00000183682	18	17	19	27	11	7
ENSG00000237624	23	19	50	26	37	29
ENSG00000182109	68	70	64	77	65	63
ENSG00000243970	41	20	29	18	33	16
ENSG00000090621	9612	8679	8925	8066	7275	7750
ENSG00000228060	25	29	22	25	33	16
ENSG00000201457	13	13	8	7	11	12
ENSG00000163909	0	3	2	0	1	1
ENSG00000225903	0	0	0	0	0	0
ENSG00000116981	2	0	5	0	2	0
ENSG00000116983	88	74	113	77	69	54
ENSG00000084072	2325	2127	2492	2290	2088	2038
ENSG00000225333	0	0	0	0	2	0
ENSG00000252413	0	0	0	0	0	0
ENSG00000116985	509	454	526	531	466	547
ENSG00000198754	47	43	51	49	54	37
ENSG00000261798	7	8	9	9	8	12
ENSG00000229213	0	0	0	0	0	0
ENSG00000043514	1280	1122	1245	1071	937	959
ENSG00000202222	1	2	1	0	1	0
ENSG00000116990	258	241	259	234	193	179
ENSG00000236546	3	1	1	3	1	2
ENSG00000207356	0	0	0	0	0	0
ENSG00000168389	869	846	917	978	830	945
ENSG00000228477	38	39	38	45	37	22
ENSG00000131236	23717	22118	23158	26124	23731	25011
ENSG00000131238	5894	5258	5855	4796	4397	4493
ENSG00000226745	0	0	0	0	0	0
ENSG00000117000	1890	1783	1934	1699	1615	1622
ENSG00000207508	2	2	0	0	1	0
ENSG00000188800	1	1	3	0	0	1
ENSG00000259943	199	210	215	178	140	167
ENSG00000084073	3450	2788	3164	2908	2707	2648
ENSG00000231296	6	2	6	1	3	4
ENSG00000049089	60	65	81	78	66	78
ENSG00000227311	0	0	0	1	0	0
ENSG00000084070	1032	967	1081	1001	861	881
ENSG00000213172	0	0	0	0	0	0
ENSG00000187801	296	298	295	248	283	271
ENSG00000260920	169	134	169	200	140	173
ENSG00000279667	5	1	1	0	2	1
ENSG00000187815	222	203	216	182	180	136
ENSG00000238287	40	29	31	22	26	29
ENSG00000164002	349	331	358	405	319	289
ENSG00000227278	0	0	1	1	1	1
ENSG00000238186	14	18	18	25	11	16
ENSG00000117010	138	152	158	153	110	136
ENSG00000236505	1	0	0	0	1	0
ENSG00000233910	0	0	0	0	0	0
ENSG00000117016	1028	1029	1028	1467	1357	1381
ENSG00000237899	6	7	9	13	6	6
ENSG00000272145	61	52	70	61	44	56
ENSG00000066136	1603	1496	1537	1499	1348	1385
ENSG00000198974	2	0	0	0	0	0
ENSG00000207962	2	0	0	0	0	0
ENSG00000117013	19	10	22	19	14	17
ENSG00000264582	0	0	0	0	0	0
ENSG00000179862	2368	1753	1815	2377	2166	2281
ENSG00000229528	0	2	0	0	1	0
ENSG00000228940	0	0	0	0	0	0
ENSG00000233118	0	0	0	0	0	0
ENSG00000171793	3275	3104	3159	3025	2697	2869
ENSG00000281207	150	135	131	118	125	115
ENSG00000171790	61	53	76	62	35	47
ENSG00000010803	754	793	774	786	661	732
ENSG00000215893	2	1	4	0	0	0
ENSG00000235358	1	1	6	0	0	0
ENSG00000213987	0	0	0	0	0	0
ENSG00000204060	54	51	58	65	60	51
ENSG00000229901	4	2	2	0	4	0
ENSG00000252563	0	0	0	0	0	0
ENSG00000127129	5	10	5	12	3	10
ENSG00000127124	336	327	318	238	275	296
ENSG00000230881	1	0	1	0	0	1
ENSG00000230638	96	98	134	88	64	73
ENSG00000227538	0	0	0	0	0	0
ENSG00000228776	0	0	0	0	1	0
ENSG00000044012	0	0	0	0	0	0
ENSG00000197273	0	0	0	0	0	0
ENSG00000198815	2430	2302	2474	2546	2479	2412
ENSG00000227527	6	12	5	10	3	5
ENSG00000177181	2	0	0	3	1	0
ENSG00000235002	0	0	0	0	0	0
ENSG00000066185	10	9	14	6	13	7
ENSG00000127125	1645	1716	1743	1611	1433	1508
ENSG00000186409	65	41	46	37	49	34
ENSG00000230116	2	0	0	0	0	0
ENSG00000236876	0	2	0	2	0	0
ENSG00000200254	0	0	0	0	0	0
ENSG00000236180	1	0	0	0	0	0
ENSG00000171960	1616	1469	1529	1483	1348	1417
ENSG00000234917	6	4	6	8	3	3
ENSG00000065978	51916	43258	47251	51518	47110	46717
ENSG00000164007	2	8	2	2	2	4
ENSG00000117385	1522	1397	1720	1605	1358	1339
ENSG00000164008	48	44	65	48	56	67
ENSG00000283580	7	10	10	8	11	16
ENSG00000228452	49	40	35	36	36	36
ENSG00000274386	15	19	10	8	9	10
ENSG00000177868	467	367	401	455	405	412
ENSG00000164010	389	407	394	359	324	338
ENSG00000228192	112	109	104	85	111	93
ENSG00000164011	382	372	351	299	274	279
ENSG00000233708	1	0	0	1	0	1
ENSG00000237090	1	0	1	1	0	0
ENSG00000225099	0	0	0	0	0	0
ENSG00000117394	12524	11574	13231	14131	12537	13105
ENSG00000227533	94	84	71	78	69	65
ENSG00000207256	1	2	1	2	2	3
ENSG00000283136	0	0	0	0	0	0
ENSG00000277513	0	0	0	0	0	0
ENSG00000186973	29	36	29	22	26	15
ENSG00000117395	4402	4082	4462	4095	3785	3653
ENSG00000243710	38	36	40	30	31	24
ENSG00000199240	0	0	0	0	0	0
ENSG00000179178	282	294	308	392	334	350
ENSG00000253313	323	348	312	348	321	305
ENSG00000066056	3	5	9	1	2	5
ENSG00000117400	24	20	19	16	15	27
ENSG00000234694	137	143	130	148	102	96
ENSG00000117399	8293	7651	8593	7325	6331	6629
ENSG00000066322	3783	3834	4196	4487	3767	4096
ENSG00000159479	1436	1309	1535	1553	1474	1485
ENSG00000229431	36	32	39	45	48	49
ENSG00000198198	1947	1941	2026	1664	1534	1648
ENSG00000229372	6	7	7	6	5	9
ENSG00000274975	0	0	0	0	0	0
ENSG00000178922	986	939	885	1225	1047	1027
ENSG00000229348	10	15	10	13	8	9
ENSG00000142949	26527	24603	26382	25482	24209	24527
ENSG00000066135	3857	3543	3822	3626	3564	3411
ENSG00000236200	62	70	67	89	76	86
ENSG00000126091	359	369	394	380	306	385
ENSG00000229444	3	1	2	1	1	3
ENSG00000283414	0	0	0	0	0	0
ENSG00000233674	3	0	5	7	11	0
ENSG00000283477	0	0	0	1	0	0
ENSG00000224751	0	2	0	0	1	2
ENSG00000117407	1410	1347	1403	1687	1334	1492
ENSG00000237950	22	23	16	29	28	26
ENSG00000117408	1639	1607	1864	1695	1421	1508
ENSG00000132768	978	856	934	826	768	759
ENSG00000117410	2291	2037	2329	2474	2040	2099
ENSG00000117411	2634	2468	2966	2788	2293	2514
ENSG00000159214	823	819	817	1131	978	987
ENSG00000196517	829	791	842	1252	1097	1114
ENSG00000230615	82	55	53	96	79	69
ENSG00000227163	0	1	1	4	1	0
ENSG00000271647	0	0	2	0	0	1
ENSG00000239560	0	0	0	0	0	0
ENSG00000171872	6	15	12	22	15	14
ENSG00000233514	0	0	0	0	0	1
ENSG00000283039	1	0	1	0	0	0
ENSG00000226804	1	0	0	0	0	0
ENSG00000200171	0	0	0	0	0	0
ENSG00000238037	0	0	0	1	1	0
ENSG00000227994	0	0	0	0	0	0
ENSG00000271329	1	0	1	1	3	0
ENSG00000178028	1654	1531	1638	1592	1499	1416
ENSG00000117419	1964	1864	2188	1838	1529	1608
ENSG00000233602	14	9	9	18	8	7
ENSG00000199385	0	0	0	0	0	0
ENSG00000187147	2702	2261	2415	2522	2097	2180
ENSG00000263381	0	0	0	1	0	0
ENSG00000126106	365	281	347	401	314	325
ENSG00000198520	19	22	27	29	16	15
ENSG00000199377	0	2	2	1	2	1
ENSG00000200169	8	1	3	7	4	5
ENSG00000142945	5368	5142	5550	4607	4109	4253
ENSG00000225721	29	27	16	36	33	29
ENSG00000142937	33032	29893	32911	35104	28902	29716
ENSG00000264294	0	0	0	0	0	0
ENSG00000200913	21	9	8	16	9	7
ENSG00000202031	9	3	1	0	4	2
ENSG00000281859	0	0	0	0	0	0
ENSG00000207421	0	0	0	0	0	0
ENSG00000234093	3	3	0	4	3	3
ENSG00000142959	13	12	13	19	13	22
ENSG00000173846	1046	944	1085	1280	1137	1076
ENSG00000188396	39	51	58	37	38	45
ENSG00000222009	367	413	380	534	402	450
ENSG00000117425	10	8	10	16	8	7
ENSG00000202444	0	0	0	0	0	0
ENSG00000226499	0	1	2	3	0	0
ENSG00000070785	1085	995	1040	968	836	846
ENSG00000253039	0	0	0	1	0	0
ENSG00000229815	0	0	1	0	0	0
ENSG00000232369	3	1	2	1	2	0
ENSG00000268949	0	2	0	0	0	0
ENSG00000126107	1697	1573	1703	1700	1576	1618
ENSG00000126088	2284	2330	2657	2547	2286	2434
ENSG00000162415	3	2	3	6	1	2
ENSG00000234315	0	0	0	0	0	0
ENSG00000281912	12	16	15	12	19	15
ENSG00000186603	503	405	506	313	281	256
ENSG00000132781	1088	993	1169	1043	890	928
ENSG00000132773	451	477	459	425	361	378
ENSG00000070759	299	247	290	306	310	311
ENSG00000236872	0	1	0	1	0	1
ENSG00000280670	91	87	89	88	65	70
ENSG00000132763	632	627	580	522	438	468
ENSG00000117450	17110	15755	17539	17320	15768	15999
ENSG00000234379	0	0	0	0	0	0
ENSG00000117448	1815	1718	1882	1670	1595	1542
ENSG00000281133	0	1	3	0	0	1
ENSG00000280836	1	2	1	0	1	2
ENSG00000132780	8588	8063	8458	8011	7505	7415
ENSG00000281112	0	0	0	0	0	0
ENSG00000281825	0	2	0	0	0	0
ENSG00000159588	81	107	66	96	65	64
ENSG00000159592	4851	4471	4730	4487	4278	4303
ENSG00000225447	20	25	19	18	28	20
ENSG00000234329	24	24	28	25	20	14
ENSG00000159596	1787	1665	1850	1790	1565	1660
ENSG00000197429	919	953	955	767	724	703
ENSG00000230896	59	67	92	56	51	53
ENSG00000236111	1	1	0	1	0	1
ENSG00000086015	2715	2673	2832	2611	2363	2573
ENSG00000232467	0	0	1	0	1	1
ENSG00000117461	1142	1138	1209	977	797	903
ENSG00000278139	0	0	0	0	0	0
ENSG00000226957	2	0	1	0	0	0
ENSG00000233114	0	0	0	0	1	0
ENSG00000227857	5	6	8	3	7	4
ENSG00000117472	4403	4271	4839	4484	3779	3985
ENSG00000250719	0	0	0	0	0	0
ENSG00000085998	2826	2508	2782	2801	2406	2572
ENSG00000171357	248	249	269	231	220	213
ENSG00000085999	1413	1287	1483	1348	1199	1231
ENSG00000132128	2987	2712	2954	2764	2421	2484
ENSG00000173660	8248	7379	7075	8412	7713	7658
ENSG00000117481	1342	1256	1354	1174	1180	1149
ENSG00000225779	3	0	0	0	0	0
ENSG00000117480	39	40	44	34	31	30
ENSG00000232022	12	12	8	14	11	13
ENSG00000224863	3	3	0	2	0	1
ENSG00000197587	2	4	3	3	3	2
ENSG00000282881	0	0	0	0	0	0
ENSG00000269956	43	31	37	38	35	35
ENSG00000162456	0	0	0	0	0	0
ENSG00000079277	1736	1622	1819	1878	1673	1706
ENSG00000142961	1131	1028	1099	1207	1088	1106
ENSG00000123472	1816	1522	1663	1602	1337	1438
ENSG00000233647	1	0	1	0	0	5
ENSG00000186118	0	4	3	4	3	0
ENSG00000228237	15	16	12	8	5	7
ENSG00000159658	4003	3634	3981	3674	3271	3560
ENSG00000236476	0	0	0	0	0	0
ENSG00000142973	21	18	19	8	17	18
ENSG00000154198	0	0	0	1	0	0
ENSG00000238145	0	0	0	0	0	0
ENSG00000187048	0	0	0	0	0	0
ENSG00000259832	0	0	0	0	0	0
ENSG00000261196	0	0	0	0	0	0
ENSG00000261593	0	0	0	0	0	0
ENSG00000261290	0	0	0	0	0	0
ENSG00000186377	8	7	15	9	16	9
ENSG00000186160	6	8	7	3	7	5
ENSG00000225154	0	0	0	0	0	0
ENSG00000225506	90	98	100	76	106	87
ENSG00000162365	3	4	2	1	0	4
ENSG00000225514	0	3	0	0	0	0
ENSG00000224805	29	28	25	25	18	25
ENSG00000162366	5	7	18	58	59	58
ENSG00000162367	1	0	1	0	0	0
ENSG00000226252	0	0	0	0	0	0
ENSG00000123473	2449	2249	2435	2209	2057	2065
ENSG00000162368	5404	4634	5124	5169	4699	4823
ENSG00000225762	2	4	2	2	1	1
ENSG00000186790	4	2	3	4	6	5
ENSG00000237424	140	117	161	121	125	107
ENSG00000186564	86	96	62	98	67	79
ENSG00000271355	0	0	0	0	0	0
ENSG00000229554	0	0	0	0	0	0
ENSG00000227883	0	0	0	0	0	0
ENSG00000227947	0	0	0	0	0	0
ENSG00000269113	0	0	0	0	1	0
ENSG00000223814	0	0	0	0	0	0
ENSG00000225028	0	0	0	0	0	0
ENSG00000226133	0	0	0	0	0	0
ENSG00000231413	0	0	0	0	0	0
ENSG00000237180	0	0	0	0	0	0
ENSG00000242267	0	1	0	0	0	0
ENSG00000279096	0	0	0	0	0	0
ENSG00000223720	0	0	0	0	0	0
ENSG00000117834	1	1	0	2	0	2
ENSG00000272491	0	0	0	0	0	0
ENSG00000279214	0	0	0	0	0	0
ENSG00000132122	124	104	154	92	120	134
ENSG00000224986	0	0	0	0	0	0
ENSG00000206700	0	0	0	0	0	0
ENSG00000235105	2	1	0	1	1	0
ENSG00000223175	0	0	0	0	0	0
ENSG00000232514	0	0	0	0	0	0
ENSG00000186094	0	0	0	0	0	0
ENSG00000162373	0	0	0	0	0	0
ENSG00000229846	0	0	0	0	0	0
ENSG00000230114	0	0	0	0	0	0
ENSG00000225623	0	0	0	0	0	0
ENSG00000237478	0	0	0	0	0	0
ENSG00000215887	0	0	0	0	0	0
ENSG00000279324	0	0	0	0	0	0
ENSG00000233595	0	0	0	0	0	0
ENSG00000162374	0	0	0	0	0	0
ENSG00000230828	0	0	0	0	0	0
ENSG00000237337	0	0	0	0	0	0
ENSG00000233407	0	0	0	0	0	0
ENSG00000234080	1	0	0	1	1	0
ENSG00000229316	0	0	0	0	0	0
ENSG00000225671	0	0	0	0	0	0
ENSG00000142700	0	0	0	0	0	0
ENSG00000185104	1950	1731	1967	1939	1660	1741
ENSG00000225767	1	1	3	6	2	1
ENSG00000207194	0	0	0	0	0	0
ENSG00000230585	2	4	8	2	3	1
ENSG00000237130	0	1	0	0	0	1
ENSG00000123080	388	371	416	316	281	294
ENSG00000265538	0	0	0	0	0	0
ENSG00000275816	0	0	0	0	0	0
ENSG00000204006	0	0	0	0	0	0
ENSG00000200262	0	0	0	0	0	0
ENSG00000213478	0	0	0	0	0	0
ENSG00000203356	1	3	1	0	0	0
ENSG00000123091	3248	2888	3180	3278	2982	3122
ENSG00000233406	9	1	8	4	2	3
ENSG00000236434	0	0	1	2	2	0
ENSG00000085831	76	61	87	92	73	77
ENSG00000261664	0	0	1	0	0	0
ENSG00000085832	2250	1919	2174	1857	1880	1852
ENSG00000232027	3	7	11	6	2	3
ENSG00000206595	0	0	1	2	0	0
ENSG00000238140	1	0	1	0	0	0
ENSG00000227070	3	8	6	14	7	10
ENSG00000252032	0	0	0	0	0	0
ENSG00000227742	0	2	0	0	2	0
ENSG00000117859	5140	4570	4912	4652	4542	4565
ENSG00000236973	1	0	0	0	0	0
ENSG00000232846	1	0	0	0	1	0
ENSG00000212624	0	0	0	0	0	0
ENSG00000078618	9775	8921	9595	8924	8518	8583
ENSG00000266993	26	22	43	25	29	34
ENSG00000272175	6	4	1	1	0	0
ENSG00000230604	2	0	0	3	1	0
ENSG00000169213	4905	4509	4752	4705	4484	4727
ENSG00000200839	0	0	0	1	0	0
ENSG00000229032	0	0	1	0	0	0
ENSG00000264613	0	0	0	0	0	0
ENSG00000117862	2910	2605	2780	3164	2698	2735
ENSG00000198841	339	361	382	323	283	237
ENSG00000223390	2	1	2	3	5	1
ENSG00000228369	6	7	2	2	2	2
ENSG00000134717	2495	2221	2502	2438	2239	2228
ENSG00000157077	1939	1697	1861	2175	1935	2110
ENSG00000241745	0	1	1	0	0	0
ENSG00000228407	8	16	11	9	10	12
ENSG00000223429	2	7	0	3	1	0
ENSG00000224255	1	0	0	0	2	0
ENSG00000236004	0	2	0	0	0	1
ENSG00000237663	2	1	0	1	0	1
ENSG00000213735	0	2	1	0	1	0
ENSG00000154222	1844	1713	1850	1975	1652	1715
ENSG00000272100	15	12	8	6	9	10
ENSG00000224680	2	5	13	4	8	3
ENSG00000085840	1137	1051	1194	1175	952	1067
ENSG00000134748	2065	1936	2064	1949	1559	1839
ENSG00000134744	3072	2879	3002	2367	2377	2389
ENSG00000272371	0	0	0	0	0	0
ENSG00000236290	0	0	0	0	0	0
ENSG00000116157	6	11	16	16	7	4
ENSG00000182183	37	62	44	44	36	39
ENSG00000162377	1991	1752	1937	1544	1447	1482
ENSG00000233664	0	0	0	0	0	0
ENSG00000239640	0	0	0	0	0	0
ENSG00000162378	1919	1632	1727	1491	1364	1370
ENSG00000252018	0	0	0	0	0	0
ENSG00000228929	5	4	5	7	4	10
ENSG00000206627	0	1	0	1	0	0
ENSG00000203995	624	541	606	507	438	521
ENSG00000242391	6	3	6	8	9	6
ENSG00000121310	2009	1976	2042	1917	1706	1621
ENSG00000230953	59	43	64	33	39	31
ENSG00000231866	0	0	1	0	0	0
ENSG00000116171	3273	2956	3335	2991	2679	2773
ENSG00000264834	0	0	0	1	0	0
ENSG00000266188	0	0	0	0	0	0
ENSG00000265815	0	0	0	1	0	0
ENSG00000237279	0	0	0	1	0	0
ENSG00000236360	2	1	0	0	1	3
ENSG00000226147	0	1	0	2	0	0
ENSG00000279054	0	0	0	1	0	0
ENSG00000174348	0	0	0	0	0	0
ENSG00000232993	0	0	0	0	0	0
ENSG00000227644	0	0	0	0	0	0
ENSG00000162383	0	0	1	0	0	0
ENSG00000235563	0	0	0	0	0	0
ENSG00000277397	0	0	0	0	0	0
ENSG00000157184	947	901	934	869	733	783
ENSG00000236723	5	7	8	16	2	5
ENSG00000162384	1019	892	978	947	858	821
ENSG00000259818	9	5	8	6	1	1
ENSG00000162385	2432	2185	2020	2214	2227	2040
ENSG00000226754	24	23	29	19	20	21
ENSG00000157193	1951	1659	1815	1582	1344	1479
ENSG00000234578	2	2	7	0	0	1
ENSG00000228838	1	2	2	2	0	2
ENSG00000225030	0	5	2	5	1	1
ENSG00000232762	11	14	12	9	10	4
ENSG00000225675	6	3	5	3	7	4
ENSG00000226938	0	0	0	0	0	0
ENSG00000230138	0	0	0	0	0	0
ENSG00000236253	0	0	1	0	0	0
ENSG00000143006	0	3	3	3	4	4
ENSG00000174332	1	0	0	0	1	0
ENSG00000239007	0	0	0	0	0	0
ENSG00000058804	3035	2710	3033	2250	2086	2123
ENSG00000201003	0	2	3	0	1	1
ENSG00000229687	0	0	0	0	0	0
ENSG00000058799	845	799	950	937	883	974
ENSG00000211452	16	4	12	21	9	7
ENSG00000081870	1485	1323	1313	1516	1231	1409
ENSG00000116212	2911	2740	2968	3094	2817	2695
ENSG00000219102	9	10	5	6	10	8
ENSG00000203985	3	2	0	2	0	0
ENSG00000116209	4379	4073	4274	4699	4198	4277
ENSG00000280378	3	12	8	6	11	7
ENSG00000116205	871	878	933	702	621	661
ENSG00000225183	1	0	0	0	0	1
ENSG00000279049	0	0	0	0	0	0
ENSG00000256407	1	2	3	0	0	3
ENSG00000157211	3	0	0	0	0	0
ENSG00000280425	0	0	0	0	1	2
ENSG00000215883	244	204	241	169	159	149
ENSG00000116221	3758	3327	3792	3761	3232	3364
ENSG00000157216	1482	1265	1407	1565	1286	1396
ENSG00000198711	34	30	25	19	22	29
ENSG00000225632	0	0	1	2	0	0
ENSG00000232245	0	0	0	0	0	0
ENSG00000235741	12	4	11	6	13	2
ENSG00000237173	0	0	0	0	0	0
ENSG00000227453	0	1	0	1	0	0
ENSG00000162390	592	494	597	612	543	596
ENSG00000162391	33	37	29	29	28	26
ENSG00000230728	1	0	1	0	0	1
ENSG00000184313	2	3	1	1	2	3
ENSG00000271723	0	0	0	1	0	1
ENSG00000243725	441	379	480	351	387	336
ENSG00000162396	281	250	319	257	195	252
ENSG00000006555	774	674	734	641	620	617
ENSG00000237453	1	4	1	0	2	4
ENSG00000162398	5	6	10	9	4	8
ENSG00000116133	25395	24404	26649	24682	21934	22884
ENSG00000242396	67	72	48	65	50	38
ENSG00000233203	19	24	17	23	12	13
ENSG00000143001	64	97	78	94	67	58
ENSG00000233271	0	0	0	0	0	0
ENSG00000162399	1	0	0	0	1	1
ENSG00000169174	13655	12768	14312	13407	11692	11995
ENSG00000162402	5474	5114	5226	4541	4349	4464
ENSG00000231090	0	0	0	0	0	0
ENSG00000231095	0	0	3	0	0	0
ENSG00000265822	0	0	0	0	0	0
ENSG00000231900	0	0	0	0	0	0
ENSG00000232198	0	0	0	0	0	0
ENSG00000199831	0	0	0	0	0	0
ENSG00000252162	0	0	0	0	0	0
ENSG00000272051	0	0	0	0	0	0
ENSG00000234810	0	0	0	0	0	0
ENSG00000230250	0	0	0	0	0	0
ENSG00000227104	0	0	0	0	0	0
ENSG00000233079	0	0	0	0	0	0
ENSG00000235612	0	0	0	0	0	0
ENSG00000229871	0	0	0	0	0	0
ENSG00000260971	0	0	0	0	0	0
ENSG00000223956	2	0	0	0	0	0
ENSG00000162407	171	148	213	187	158	157
ENSG00000236776	0	0	0	0	0	0
ENSG00000224980	1	0	0	0	0	0
ENSG00000225475	0	0	1	0	0	0
ENSG00000162409	56	42	46	34	23	49
ENSG00000187889	2	6	0	0	2	0
ENSG00000229913	0	0	0	0	0	0
ENSG00000157131	0	0	0	0	0	0
ENSG00000021852	0	0	0	0	0	0
ENSG00000236341	0	0	0	0	0	0
ENSG00000173406	3	5	0	0	0	1
ENSG00000227935	0	0	0	0	0	0
ENSG00000236888	0	0	0	0	0	0
ENSG00000226759	0	0	0	0	0	0
ENSG00000229887	0	1	0	0	0	1
ENSG00000223416	0	0	0	1	0	1
ENSG00000235038	0	0	0	0	0	0
ENSG00000230546	0	0	0	0	0	0
ENSG00000233216	0	0	0	0	0	0
ENSG00000162600	739	565	692	483	446	479
ENSG00000270209	0	0	0	0	0	0
ENSG00000264128	0	0	0	0	0	0
ENSG00000184292	12106	10999	12286	13186	11055	11590
ENSG00000185839	4	3	9	6	5	7
ENSG00000162601	2071	1985	2028	1536	1491	1549
ENSG00000283445	56	54	68	85	57	60
ENSG00000177606	2101	1835	2166	2226	2126	2072
ENSG00000234807	15	23	25	21	16	14
ENSG00000272226	6	4	4	5	1	5
ENSG00000231740	1	0	1	0	0	0
ENSG00000232453	16	26	17	19	20	32
ENSG00000237352	9	14	11	8	14	5
ENSG00000228121	0	0	0	0	2	0
ENSG00000241042	0	0	0	0	0	0
ENSG00000235215	2	1	1	1	0	1
ENSG00000224609	2	1	0	1	0	2
ENSG00000270457	0	0	0	1	0	0
ENSG00000172456	388	334	412	384	318	389
ENSG00000266150	0	0	0	0	0	0
ENSG00000226883	1	5	0	4	0	1
ENSG00000134709	2562	2291	2520	2291	2040	2030
ENSG00000134716	103	82	112	102	84	98
ENSG00000265535	0	0	0	0	0	0
ENSG00000162598	0	0	0	0	0	0
ENSG00000229332	0	0	0	0	0	0
ENSG00000238242	0	0	0	0	0	0
ENSG00000226476	250	247	240	251	242	250
ENSG00000231252	0	0	0	0	0	0
ENSG00000162599	1458	1292	1306	1131	1085	1080
ENSG00000237928	0	0	0	0	0	0
ENSG00000270742	2	0	4	0	0	1
ENSG00000237853	2	2	0	2	0	2
ENSG00000223920	0	1	0	0	0	0
ENSG00000162604	984	791	923	944	876	828
ENSG00000271200	6	2	3	7	2	2
ENSG00000132849	4015	3720	3883	3934	3687	3706
ENSG00000200575	1	0	0	1	0	2
ENSG00000212360	0	2	0	0	3	0
ENSG00000236646	2	1	0	0	1	0
ENSG00000242860	2	0	0	1	1	1
ENSG00000263908	0	0	0	0	0	0
ENSG00000283690	0	0	0	0	0	0
ENSG00000234204	0	0	0	0	0	0
ENSG00000234088	0	0	0	0	0	0
ENSG00000240563	107	93	87	106	62	92
ENSG00000237227	0	0	0	0	0	0
ENSG00000200174	0	0	0	0	0	0
ENSG00000132854	75	68	81	87	100	97
ENSG00000201153	0	0	0	0	0	0
ENSG00000162607	4307	3991	4082	4377	3965	3938
ENSG00000116641	2473	2350	2495	2423	2275	2218
ENSG00000270549	0	0	0	0	0	0
ENSG00000132855	6	2	6	3	4	0
ENSG00000278967	6	6	4	1	1	10
ENSG00000213703	0	2	2	1	0	1
ENSG00000235545	3	9	10	4	8	3
ENSG00000125703	674	602	700	559	507	499
ENSG00000234318	1	0	4	0	2	0
ENSG00000237163	0	0	0	0	0	0
ENSG00000229537	0	0	0	0	0	0
ENSG00000227485	0	0	0	0	0	0
ENSG00000229225	0	0	0	0	0	0
ENSG00000203605	0	0	0	0	0	0
ENSG00000224209	1	2	1	3	2	7
ENSG00000252259	0	0	0	0	0	0
ENSG00000228734	0	4	0	1	0	0
ENSG00000223683	0	2	0	0	0	2
ENSG00000230798	0	0	0	0	0	1
ENSG00000187140	0	0	0	0	0	0
ENSG00000275836	0	0	0	0	0	0
ENSG00000252784	0	0	0	0	0	0
ENSG00000236674	0	1	0	0	0	0
ENSG00000088035	693	636	702	654	525	553
ENSG00000142856	1744	1540	1772	1474	1356	1331
ENSG00000203965	395	382	389	325	288	318
ENSG00000264271	0	2	0	0	0	0
ENSG00000251720	1	1	4	0	1	3
ENSG00000116652	38	31	43	23	28	28
ENSG00000276884	0	0	0	0	0	0
ENSG00000278287	0	0	0	0	0	0
ENSG00000277565	0	0	0	0	0	0
ENSG00000275823	0	0	0	0	0	0
ENSG00000277689	0	0	0	0	0	0
ENSG00000274199	0	0	0	0	0	0
ENSG00000079739	4517	4119	4548	5072	4526	4599
ENSG00000244256	6	8	7	11	5	6
ENSG00000185483	51	46	45	54	38	49
ENSG00000177452	0	0	0	0	0	0
ENSG00000228056	0	0	0	0	0	0
ENSG00000207190	0	0	0	0	0	0
ENSG00000200508	0	0	0	0	0	0
ENSG00000223949	0	0	0	0	0	0
ENSG00000177414	0	1	0	0	0	0
ENSG00000238653	0	0	0	0	0	0
ENSG00000158966	346	286	353	366	299	310
ENSG00000264470	0	0	0	0	0	0
ENSG00000162437	1083	1003	1135	926	805	893
ENSG00000162434	4599	4246	4680	5058	4838	4838
ENSG00000234784	0	0	0	0	0	0
ENSG00000233877	1	2	2	0	0	0
ENSG00000226891	3	4	1	1	1	2
ENSG00000185031	2	0	0	0	0	0
ENSG00000272506	0	0	0	0	0	0
ENSG00000212257	0	0	0	0	2	0
ENSG00000265996	2	3	1	1	2	0
ENSG00000199135	0	0	0	0	0	0
ENSG00000231485	0	1	1	0	0	1
ENSG00000235804	0	0	0	0	0	0
ENSG00000234496	1	0	0	0	0	0
ENSG00000162433	4496	4059	4540	3898	3732	3889
ENSG00000231622	1	0	0	0	1	0
ENSG00000116675	289	226	218	223	261	237
ENSG00000229294	0	0	0	0	0	0
ENSG00000234144	0	0	0	0	0	0
ENSG00000222624	0	0	0	0	0	0
ENSG00000213625	2010	1776	2002	1911	1809	1825
ENSG00000116678	328	300	330	280	312	247
ENSG00000237852	3	1	3	2	1	1
ENSG00000224570	0	1	2	1	0	0
ENSG00000239319	0	0	0	0	0	0
ENSG00000184588	0	1	0	0	3	1
ENSG00000227466	0	0	0	0	0	0
ENSG00000223152	0	0	0	0	0	0
ENSG00000118473	4	3	0	1	0	0
ENSG00000264720	0	0	0	0	0	0
ENSG00000248458	0	0	0	0	0	0
ENSG00000152760	0	0	2	1	0	0
ENSG00000172410	0	0	0	0	0	1
ENSG00000152763	93	100	80	81	82	76
ENSG00000231080	0	0	0	0	0	0
ENSG00000198160	2744	2588	2652	2430	2293	2277
ENSG00000116704	1277	1201	1211	948	898	917
ENSG00000203963	1	0	1	0	1	1
ENSG00000252433	0	0	0	0	0	0
ENSG00000275678	1	1	3	0	0	0
ENSG00000162594	0	2	0	0	1	0
ENSG00000253074	0	0	0	0	0	0
ENSG00000252116	0	0	0	0	0	0
ENSG00000228523	0	0	0	0	0	0
ENSG00000081985	1372	1277	1310	1044	907	1018
ENSG00000142864	23632	21287	23693	20123	18628	18481
ENSG00000223263	3	0	5	4	1	3
ENSG00000235200	0	0	0	0	2	0
ENSG00000207504	0	0	0	0	0	0
ENSG00000238139	0	0	0	0	0	0
ENSG00000242482	0	0	0	0	0	0
ENSG00000232048	0	0	0	1	0	0
ENSG00000116717	3266	2944	3032	3694	3411	3191
ENSG00000172380	8664	7877	8547	8091	8152	8165
ENSG00000238778	1	0	0	1	0	0
ENSG00000232284	43	68	45	51	26	32
ENSG00000235055	0	0	0	1	0	0
ENSG00000162595	1	3	4	8	5	6
ENSG00000228431	0	0	0	0	0	0
ENSG00000116729	4064	3505	4073	3672	3380	3375
ENSG00000234383	13	6	22	2	13	11
ENSG00000221203	2	2	1	0	0	0
ENSG00000229133	0	1	0	1	1	0
ENSG00000225242	0	0	0	0	0	0
ENSG00000237622	0	0	0	1	0	0
ENSG00000229440	0	1	0	0	0	0
ENSG00000116745	0	0	2	0	1	0
ENSG00000024526	3972	3603	3743	2880	2824	2730
ENSG00000233589	76	76	85	39	44	54
ENSG00000234264	18	17	9	5	8	15
ENSG00000225167	0	0	0	0	0	0
ENSG00000223883	0	0	0	0	0	0
ENSG00000235446	0	0	0	0	0	0
ENSG00000229639	0	0	0	0	0	0
ENSG00000033122	81	68	62	48	60	63
ENSG00000270615	0	0	0	0	0	0
ENSG00000240692	0	0	0	0	0	0
ENSG00000229359	0	0	0	0	0	0
ENSG00000237919	1	0	0	0	0	0
ENSG00000066557	1442	1255	1485	1157	1126	1076
ENSG00000244389	0	0	0	1	0	0
ENSG00000116754	8878	8163	8590	8483	7315	7498
ENSG00000228988	1	0	1	4	0	0
ENSG00000118454	966	909	973	794	812	853
ENSG00000197568	323	234	312	316	252	291
ENSG00000226088	12	12	18	6	2	7
ENSG00000279230	5	8	4	4	11	1
ENSG00000116761	325	338	350	476	436	437
ENSG00000278636	0	0	0	0	0	0
ENSG00000271992	3	9	5	4	5	2
ENSG00000233020	0	0	0	0	0	0
ENSG00000237033	0	0	0	0	0	0
ENSG00000229051	0	0	0	0	0	0
ENSG00000226208	0	0	0	0	0	0
ENSG00000050628	0	0	0	1	0	4
ENSG00000235782	0	0	0	0	0	0
ENSG00000269933	0	0	0	0	0	0
ENSG00000235079	11	5	6	4	1	0
ENSG00000132485	5038	4608	4845	4568	4135	4178
ENSG00000207721	48	14	31	25	27	15
ENSG00000229956	21	13	12	14	8	7
ENSG00000226324	0	0	0	0	0	0
ENSG00000172260	9	3	5	4	5	2
ENSG00000231985	0	0	0	0	0	0
ENSG00000271618	0	0	0	0	0	0
ENSG00000228853	0	0	0	0	0	0
ENSG00000233994	0	2	3	2	4	2
ENSG00000227207	0	0	0	0	0	0
ENSG00000212366	0	0	0	0	0	0
ENSG00000225087	0	2	0	0	0	0
ENSG00000227016	1	0	0	0	0	0
ENSG00000280317	0	0	0	0	0	0
ENSG00000229636	0	0	0	0	0	0
ENSG00000251825	0	0	0	0	0	0
ENSG00000233973	0	0	0	0	0	0
ENSG00000223479	0	0	0	0	0	0
ENSG00000200601	0	0	0	0	0	0
ENSG00000252005	0	0	0	0	0	0
ENSG00000162620	136	134	135	83	70	119
ENSG00000254685	701	691	713	536	547	510
ENSG00000259030	18	17	23	8	11	13
ENSG00000116783	3	1	1	0	2	4
ENSG00000237324	1	0	0	0	1	0
ENSG00000233894	1	0	0	0	0	0
ENSG00000162621	0	0	0	0	0	0
ENSG00000178965	2	1	1	0	0	2
ENSG00000234497	0	0	0	0	0	0
ENSG00000272864	2	2	1	3	0	0
ENSG00000116791	2552	2373	2605	2265	2144	2190
ENSG00000162623	1371	1224	1347	1151	1057	1156
ENSG00000229943	0	0	0	0	0	0
ENSG00000261213	0	0	0	0	0	0
ENSG00000224127	0	0	0	0	0	0
ENSG00000162624	0	0	0	0	0	0
ENSG00000224149	0	0	0	0	0	0
ENSG00000206999	0	0	0	0	0	0
ENSG00000137968	45	29	25	35	34	32
ENSG00000224493	0	0	0	0	0	0
ENSG00000252338	0	0	0	0	0	0
ENSG00000213579	0	0	0	0	0	0
ENSG00000230863	0	0	0	0	0	0
ENSG00000178193	1	0	0	2	0	0
ENSG00000117054	1668	1381	1668	1478	1401	1325
ENSG00000181227	19	10	24	12	7	7
ENSG00000137955	2880	2650	2854	2565	2482	2477
ENSG00000206620	0	0	0	0	0	0
ENSG00000207241	0	0	0	0	0	0
ENSG00000201487	0	0	0	0	0	0
ENSG00000057468	12	11	3	8	12	5
ENSG00000154007	0	0	0	0	0	0
ENSG00000225605	0	0	0	2	0	0
ENSG00000230027	0	0	0	0	0	0
ENSG00000184005	5	3	6	5	10	4
ENSG00000223905	0	0	0	0	0	0
ENSG00000272855	0	0	0	0	0	0
ENSG00000226415	49	49	79	77	61	50
ENSG00000199921	0	0	0	0	0	0
ENSG00000237552	0	0	0	0	0	0
ENSG00000117069	148	134	118	115	98	142
ENSG00000276081	3	0	0	0	0	1
ENSG00000230498	8	3	3	2	2	6
ENSG00000142892	1589	1461	1558	1438	1327	1413
ENSG00000226084	106	103	64	108	90	92
ENSG00000228187	0	0	0	0	0	1
ENSG00000154027	32	21	32	15	11	13
ENSG00000233099	0	0	0	0	0	0
ENSG00000251767	0	0	0	0	0	0
ENSG00000036549	2215	2002	2184	1800	1826	1665
ENSG00000251785	1	0	1	1	0	0
ENSG00000243437	1	0	1	1	0	0
ENSG00000077254	2351	2143	2367	2042	2001	2010
ENSG00000232672	0	0	1	0	0	0
ENSG00000180488	1106	1024	1101	977	914	910
ENSG00000222849	4	5	3	0	5	2
ENSG00000219201	41	35	33	32	34	30
ENSG00000235613	4	1	5	3	2	1
ENSG00000232015	0	1	0	0	0	0
ENSG00000235927	13	13	10	7	14	5
ENSG00000162614	153	116	114	92	80	96
ENSG00000162613	7787	6985	7413	6801	6582	6877
ENSG00000162616	1771	1517	1712	1335	1214	1197
ENSG00000137960	114	101	115	81	81	80
ENSG00000273338	19	10	15	12	20	7
ENSG00000213561	0	2	1	0	2	3
ENSG00000251958	0	0	0	0	0	0
ENSG00000213560	0	0	0	0	0	0
ENSG00000202263	0	0	0	0	1	0
ENSG00000233333	0	0	0	0	0	0
ENSG00000237413	0	0	0	0	1	0
ENSG00000122420	3	0	0	4	3	0
ENSG00000227556	0	0	0	0	0	0
ENSG00000212308	0	0	0	0	0	0
ENSG00000137959	237	226	118	347	356	506
ENSG00000137965	894	831	867	1216	998	1190
ENSG00000238015	0	0	0	1	0	0
ENSG00000235400	0	1	0	0	0	0
ENSG00000162618	0	0	0	3	0	0
ENSG00000230787	0	0	0	1	0	0
ENSG00000235011	0	0	0	0	0	0
ENSG00000282898	0	0	0	0	0	0
ENSG00000232676	0	0	0	0	0	0
ENSG00000235756	0	0	0	0	0	0
ENSG00000260322	0	0	0	0	0	0
ENSG00000277670	0	0	0	0	0	0
ENSG00000236407	0	0	0	0	0	0
ENSG00000225598	0	0	0	0	0	0
ENSG00000213559	1	0	0	0	0	0
ENSG00000227062	0	0	0	0	0	0
ENSG00000234108	0	0	0	0	0	0
ENSG00000224326	0	0	0	0	0	0
ENSG00000234184	0	0	0	0	0	0
ENSG00000227937	0	0	0	0	0	0
ENSG00000229752	0	0	0	0	0	0
ENSG00000235089	0	0	0	0	0	0
ENSG00000223026	0	0	0	0	0	0
ENSG00000117114	69	48	46	64	50	39
ENSG00000224494	0	0	0	0	0	0
ENSG00000227288	1	1	1	2	0	0
ENSG00000227960	0	0	0	0	0	0
ENSG00000234953	0	0	0	0	0	0
[truncated: 56,144 more rows]

## Sheet: Supplementary Data 4
Gene	End-Live-MM-3	End-Live-MM-2	End-Live-MM-1	End-NT-3	End-NT-2	End-NT-1
ENSG00000223972	0	0	0	0	1	0
ENSG00000227232	121	121	104	119	93	118
ENSG00000278267	8	11	13	9	2	6
ENSG00000243485	0	1	0	0	0	0
ENSG00000237613	0	0	0	0	0	0
ENSG00000268020	0	0	0	0	0	0
ENSG00000240361	0	0	0	0	0	0
ENSG00000186092	0	0	0	0	0	0
ENSG00000238009	15	14	12	19	8	19
ENSG00000239945	0	0	0	0	0	0
ENSG00000233750	0	0	0	0	0	0
ENSG00000268903	1	2	0	0	2	1
ENSG00000269981	0	0	0	0	2	0
ENSG00000239906	0	0	1	0	0	0
ENSG00000241860	10	13	5	9	14	6
ENSG00000222623	0	0	0	0	0	0
ENSG00000241599	0	0	0	0	0	0
ENSG00000279928	3	2	4	2	1	1
ENSG00000279457	257	255	205	251	217	274
ENSG00000273874	0	0	0	0	0	0
ENSG00000228463	19	20	13	26	14	29
ENSG00000241670	0	0	0	0	0	0
ENSG00000236679	1	0	1	0	0	0
ENSG00000236743	1	0	0	0	2	0
ENSG00000236601	0	0	1	0	0	0
ENSG00000237094	10	10	7	12	17	16
ENSG00000269732	0	0	0	0	0	0
ENSG00000278566	0	0	0	0	0	0
ENSG00000224813	0	0	0	0	0	0
ENSG00000233653	0	0	0	0	0	1
ENSG00000250575	1	1	0	2	0	0
ENSG00000278757	0	0	0	0	0	0
ENSG00000230021	2	2	0	4	2	0
ENSG00000235146	0	0	0	0	0	0
ENSG00000225972	3	3	5	3	6	10
ENSG00000225630	285	322	216	253	239	274
ENSG00000237973	467	548	473	584	469	538
ENSG00000278791	0	0	0	0	0	0
ENSG00000229344	9	12	13	5	6	20
ENSG00000240409	2	6	2	5	8	6
ENSG00000248527	7637	8676	7073	7413	6730	9581
ENSG00000198744	5	11	13	13	6	11
ENSG00000268663	0	0	0	0	0	1
ENSG00000273547	0	0	0	0	0	0
ENSG00000283574	0	0	0	0	0	0
ENSG00000229376	1	1	1	6	3	3
ENSG00000228327	300	305	307	288	306	322
ENSG00000223181	0	2	0	0	0	0
ENSG00000229905	0	1	0	0	1	3
ENSG00000237491	42	57	47	40	38	58
ENSG00000230092	11	15	8	15	17	14
ENSG00000177757	8	10	11	5	8	10
ENSG00000228794	359	378	347	361	324	404
ENSG00000225880	22	39	23	29	34	31
ENSG00000230368	0	0	1	0	0	0
ENSG00000234711	0	0	0	1	0	0
ENSG00000283040	0	0	1	0	0	0
ENSG00000272438	4	17	6	12	11	9
ENSG00000230699	24	22	24	25	30	27
ENSG00000241180	3	0	1	0	2	1
ENSG00000223764	7	9	6	8	6	7
ENSG00000187634	16	12	16	18	12	13
ENSG00000188976	6039	6540	6080	6725	6228	7093
ENSG00000187961	587	673	663	518	538	625
ENSG00000187583	751	844	761	650	573	751
ENSG00000187642	387	470	478	401	339	388
ENSG00000272512	182	174	170	137	165	200
ENSG00000188290	2255	3061	2904	2768	2604	2859
ENSG00000187608	54125	58850	56197	46819	42378	49191
ENSG00000231702	4	7	6	0	1	6
ENSG00000224969	33	31	35	34	32	42
ENSG00000188157	40334	42464	36943	33151	31482	37991
ENSG00000242590	0	0	0	0	0	0
ENSG00000217801	354	337	360	264	235	303
ENSG00000273443	112	138	118	100	94	129
ENSG00000237330	182	201	189	149	126	153
ENSG00000131591	535	527	501	455	425	519
ENSG00000223823	0	0	0	0	0	0
ENSG00000207730	1	7	2	8	8	5
ENSG00000207607	8	14	8	13	2	16
ENSG00000198976	12	15	7	13	5	11
ENSG00000272141	68	91	75	62	51	61
ENSG00000205231	4	2	7	3	1	5
ENSG00000162571	8	5	3	8	3	1
ENSG00000186891	1	7	3	6	3	2
ENSG00000186827	2	0	2	0	2	1
ENSG00000078808	4810	5264	5060	4941	4440	5171
ENSG00000176022	705	837	724	865	720	912
ENSG00000184163	43	77	68	64	55	83
ENSG00000260179	22	21	18	11	9	15
ENSG00000160087	1674	1883	1690	1744	1636	1902
ENSG00000230415	10	11	14	13	8	15
ENSG00000162572	40	36	41	43	43	53
ENSG00000131584	1450	1579	1415	1313	1323	1531
ENSG00000278073	0	0	0	0	0	0
ENSG00000169972	497	525	522	562	480	545
ENSG00000127054	3601	3812	3491	3370	3201	3946
ENSG00000240731	138	138	126	135	129	138
ENSG00000224051	1199	1246	1234	1241	1059	1366
ENSG00000169962	30	19	26	19	20	27
ENSG00000107404	4469	4804	4388	4527	4332	4964
ENSG00000162576	751	768	721	667	700	706
ENSG00000175756	4157	4391	4390	4523	4113	4697
ENSG00000223663	0	0	2	1	2	0
ENSG00000221978	4570	4907	4200	4021	3903	4538
ENSG00000224870	848	875	793	870	789	959
ENSG00000242485	2173	2284	2255	2375	2108	2487
ENSG00000264293	0	0	0	0	0	0
ENSG00000272455	78	65	53	54	50	79
ENSG00000235098	53	38	32	51	43	44
ENSG00000225905	1	4	1	4	1	1
ENSG00000205116	0	2	1	0	0	3
ENSG00000225285	0	0	0	0	0	0
ENSG00000179403	86	111	105	104	78	116
ENSG00000215915	3	1	4	2	3	3
ENSG00000160072	2323	2536	2429	2552	2429	2636
ENSG00000197785	2275	2575	2329	2554	2349	2656
ENSG00000205090	30	37	41	21	21	31
ENSG00000160075	3775	4305	4042	4247	3957	4475
ENSG00000215014	10	19	16	14	11	21
ENSG00000279244	0	0	0	0	0	0
ENSG00000274481	0	0	0	0	0	0
ENSG00000228594	506	563	432	538	487	672
ENSG00000272106	72	91	49	70	64	96
ENSG00000197530	1215	1341	1158	1207	1056	1233
ENSG00000189409	1	6	4	0	2	3
ENSG00000248333	2123	2262	2211	2101	1992	2360
ENSG00000272004	5	0	5	7	3	3
ENSG00000189339	1326	1466	1230	1263	1195	1343
ENSG00000269737	44	56	50	36	36	29
ENSG00000215914	0	0	0	1	0	0
ENSG00000008128	676	700	609	650	576	664
ENSG00000268575	84	90	69	107	78	86
ENSG00000227775	124	101	74	95	96	111
ENSG00000215790	142	156	136	124	104	140
ENSG00000008130	3248	3468	3132	3184	3077	3567
ENSG00000078369	14528	15949	15049	15117	13885	16782
ENSG00000231050	21	11	16	17	14	20
ENSG00000169885	10	12	12	11	10	9
ENSG00000178821	47	54	43	52	48	60
ENSG00000142609	14	21	19	9	5	9
ENSG00000233542	0	1	0	0	0	0
ENSG00000187730	1	1	1	0	0	1
ENSG00000226969	2	0	1	0	0	0
ENSG00000067606	967	985	901	828	807	965
ENSG00000271806	10	8	7	5	7	5
ENSG00000182873	96	103	86	83	93	115
ENSG00000162585	1046	1078	1064	1069	912	1090
ENSG00000234396	1	11	3	7	5	8
ENSG00000157933	2059	2370	2003	2005	1877	2242
ENSG00000116151	382	410	393	371	398	404
ENSG00000272161	2	0	1	0	1	0
ENSG00000269896	87	72	84	102	85	116
ENSG00000272420	11	10	5	6	10	13
ENSG00000157916	3724	4056	3816	3607	3452	4165
ENSG00000157911	567	567	519	597	518	650
ENSG00000149527	3404	3552	3241	3017	2961	3570
ENSG00000224387	35	35	25	30	36	28
ENSG00000229393	44	46	44	38	34	26
ENSG00000157881	1040	1119	1038	1027	928	1198
ENSG00000197921	20	30	19	32	25	24
ENSG00000272449	21	39	22	31	33	30
ENSG00000238164	26	26	26	17	22	22
ENSG00000157873	502	522	470	322	338	393
ENSG00000225931	1	4	0	1	0	1
ENSG00000228037	0	1	1	1	1	1
ENSG00000157870	852	872	882	820	748	903
ENSG00000142606	3	2	4	4	5	6
ENSG00000237058	0	0	0	0	0	0
ENSG00000215912	6	12	12	12	14	15
ENSG00000283259	0	0	0	0	0	0
ENSG00000233234	0	0	0	0	0	0
ENSG00000231630	1	0	2	1	2	2
ENSG00000169717	0	0	0	0	0	0
ENSG00000177133	0	2	0	0	0	0
ENSG00000142611	30	26	28	33	30	18
ENSG00000283572	0	0	0	0	0	0
ENSG00000226286	0	0	0	0	0	0
ENSG00000279839	0	0	0	0	0	0
ENSG00000272235	0	0	0	0	0	0
ENSG00000130762	1615	1627	1462	1502	1398	1726
ENSG00000272088	0	0	1	4	1	1
ENSG00000162591	197	199	184	140	140	162
ENSG00000207776	0	0	0	0	0	0
ENSG00000238260	7	10	16	10	6	13
ENSG00000158109	1187	1247	1139	1158	1041	1293
ENSG00000116213	949	945	854	874	769	956
ENSG00000078900	269	305	271	216	218	263
ENSG00000227589	0	2	3	1	0	0
ENSG00000235131	4	2	2	1	0	4
ENSG00000227372	1695	1922	1694	1724	1638	1939
ENSG00000276189	0	0	0	0	0	0
ENSG00000162592	2	0	0	2	4	1
ENSG00000235169	26	20	26	17	18	36
ENSG00000130764	2197	2478	2385	2481	2229	2718
ENSG00000266075	9	5	2	2	2	5
ENSG00000272153	51	56	38	45	47	46
ENSG00000116198	1660	1731	1653	1587	1539	1799
ENSG00000169598	235	289	268	296	278	310
ENSG00000198912	1347	1364	1270	1250	1225	1450
ENSG00000236423	43	66	45	37	59	52
ENSG00000233304	0	0	0	0	0	0
ENSG00000226374	0	0	0	0	0	0
ENSG00000229280	0	0	0	0	0	0
ENSG00000235054	0	0	0	0	0	0
ENSG00000227169	0	0	0	0	0	0
ENSG00000232596	0	0	0	0	0	0
ENSG00000196581	15	9	9	17	8	13
ENSG00000231510	0	0	0	0	0	0
ENSG00000260972	0	0	0	0	0	0
ENSG00000283356	0	0	0	0	0	0
ENSG00000236948	0	0	0	0	0	0
ENSG00000264341	0	0	0	0	0	0
ENSG00000264101	1	0	2	2	0	0
ENSG00000131697	859	788	655	646	758	832
ENSG00000069424	150	163	192	139	160	160
ENSG00000116254	95	84	73	96	84	100
ENSG00000116251	15687	17529	16822	17772	16630	18724
ENSG00000226944	9	1	6	2	4	6
ENSG00000158286	938	901	848	604	627	710
ENSG00000116237	4780	5043	4549	4540	4295	5232
ENSG00000225077	42	65	45	50	28	40
ENSG00000173673	1	0	0	0	1	0
ENSG00000158292	1233	1367	1137	1269	1192	1449
ENSG00000097021	3902	4226	4152	4178	3851	4587
ENSG00000271746	0	0	0	0	0	0
ENSG00000069812	2348	2593	2290	2293	2257	2461
ENSG00000187017	96	93	88	106	104	120
ENSG00000265392	0	0	0	0	0	0
ENSG00000231868	0	5	1	2	0	2
ENSG00000215788	1919	2005	1886	1669	1664	1878
ENSG00000171680	4299	4380	3988	3633	3458	3972
ENSG00000162408	1407	1650	1340	1507	1461	1663
ENSG00000253022	0	3	2	2	2	0
ENSG00000229519	21	9	12	11	14	11
ENSG00000173662	1	0	0	4	0	2
ENSG00000204859	944	1016	981	951	917	1088
ENSG00000162413	1582	1538	1476	1190	1201	1434
ENSG00000116273	1569	1688	1405	1516	1390	1641
ENSG00000041988	478	473	440	435	385	462
ENSG00000007923	3323	3604	3411	3599	3389	3933
ENSG00000228750	0	1	0	0	0	0
ENSG00000237436	7	3	1	6	6	6
ENSG00000171735	1425	1536	1559	1653	1428	1605
ENSG00000227950	0	0	0	0	0	0
ENSG00000237365	0	0	0	0	0	0
ENSG00000207056	0	0	0	0	0	0
ENSG00000237402	0	0	0	2	1	2
ENSG00000237728	0	0	0	0	1	0
ENSG00000225126	0	0	0	0	0	0
ENSG00000270171	0	0	0	0	0	0
ENSG00000270035	0	0	1	0	0	0
ENSG00000269978	0	1	0	0	0	0
ENSG00000049245	3910	4204	3801	3908	3621	4451
ENSG00000269925	30	45	31	38	30	40
ENSG00000049246	627	693	612	621	646	790
ENSG00000236266	13	20	9	12	16	22
ENSG00000049247	0	1	0	0	0	1
ENSG00000049249	21	16	23	1	10	6
ENSG00000270330	0	0	0	0	0	0
ENSG00000116288	7753	8460	8412	8852	8076	9301
ENSG00000200344	7	3	6	4	5	2
ENSG00000116285	9379	10344	9200	8598	7932	9647
ENSG00000238290	30	25	14	15	24	21
ENSG00000232848	0	0	1	0	1	0
ENSG00000229305	0	1	3	0	3	2
ENSG00000227634	1	2	0	2	3	4
ENSG00000200975	0	0	0	0	0	0
ENSG00000233645	0	0	0	0	0	0
ENSG00000251977	0	0	0	0	0	0
ENSG00000162426	11	18	22	21	15	19
ENSG00000252254	0	1	0	0	0	0
ENSG00000142599	2394	2525	2107	2170	2015	2523
ENSG00000232912	1	5	3	1	4	1
ENSG00000221083	0	0	0	0	0	0
ENSG00000270282	0	1	1	0	0	2
ENSG00000234619	0	0	3	0	1	2
ENSG00000224315	2	4	1	0	2	3
ENSG00000222511	0	0	2	0	0	0
ENSG00000226545	3	1	8	1	2	4
ENSG00000228423	10	1	2	7	4	7
ENSG00000229716	0	0	0	0	0	0
ENSG00000074800	66654	71336	67472	66613	62474	75782
ENSG00000274258	2	3	0	6	7	1
ENSG00000236269	28	50	34	32	34	39
ENSG00000230679	4	4	6	8	3	5
ENSG00000201725	1	1	1	0	2	0
ENSG00000238249	3	0	2	4	4	1
ENSG00000232208	0	0	0	0	0	0
ENSG00000232663	0	0	0	0	0	0
ENSG00000131686	0	0	2	1	1	0
ENSG00000265141	0	0	0	0	0	0
ENSG00000197241	0	0	0	0	0	0
ENSG00000142583	1	4	0	0	3	0
ENSG00000252404	0	0	0	0	0	0
ENSG00000180758	538	541	461	564	520	610
ENSG00000228526	521	604	551	428	400	480
ENSG00000234546	102	164	115	76	92	106
ENSG00000281937	1	2	4	4	2	3
ENSG00000049239	1004	1141	956	996	1004	1069
ENSG00000171621	690	802	725	613	576	643
ENSG00000252956	0	0	0	0	0	0
ENSG00000235263	0	0	0	0	0	0
ENSG00000171612	446	528	486	518	437	593
ENSG00000231181	6	11	9	10	13	18
ENSG00000188807	1074	1201	977	1082	992	1225
ENSG00000171608	723	818	733	579	491	555
ENSG00000179840	0	0	2	0	0	0
ENSG00000233268	0	0	0	0	0	0
ENSG00000231789	8	4	7	10	8	5
ENSG00000171603	14105	15655	14065	13521	12710	15156
ENSG00000271264	0	0	1	1	0	1
ENSG00000280113	1	1	1	3	2	3
ENSG00000178585	2120	2360	2219	2359	2141	2632
ENSG00000223989	0	0	0	0	0	0
ENSG00000162441	1590	1678	1503	1762	1628	1891
ENSG00000228150	43	56	29	31	35	42
ENSG00000173614	659	681	665	633	689	743
ENSG00000202415	3	2	2	2	11	5
ENSG00000283611	4	5	4	8	6	1
ENSG00000265521	0	0	3	1	0	4
ENSG00000241326	0	0	0	0	0	0
ENSG00000162444	72	67	78	69	84	89
ENSG00000130939	2270	2477	2116	2191	2088	2536
ENSG00000224340	2	2	1	0	0	0
ENSG00000233623	2	10	6	7	2	2
ENSG00000201746	3	2	2	3	0	0
ENSG00000054523	4170	4579	4065	4313	4228	4775
ENSG00000264881	0	0	1	0	0	0
ENSG00000199562	0	1	2	3	4	3
ENSG00000264501	0	0	0	0	0	0
ENSG00000142657	8172	8753	8571	8390	7541	9312
ENSG00000271989	4	2	2	3	3	2
ENSG00000251503	38	46	54	43	34	53
ENSG00000175279	359	372	392	429	405	430
ENSG00000241563	14	11	8	17	7	18
ENSG00000160049	4443	4953	4662	5476	4982	5720
ENSG00000203469	0	0	0	0	0	0
ENSG00000142655	1196	1354	1317	1201	1157	1321
ENSG00000243267	2	1	3	1	1	2
ENSG00000130940	453	481	452	348	336	413
ENSG00000272078	42	21	35	33	31	20
ENSG00000225158	0	1	1	0	0	0
ENSG00000175262	0	0	3	4	0	2
ENSG00000215785	1	0	0	3	0	0
ENSG00000120948	5704	6440	6107	5901	5659	6848
ENSG00000277726	0	1	0	0	0	0
ENSG00000009724	44	41	57	52	45	57
ENSG00000271895	57	41	56	38	45	43
ENSG00000116649	1734	1942	1868	2211	1974	2591
ENSG00000171824	4187	4259	4033	3869	3781	4567
ENSG00000226849	19	28	28	31	10	12
ENSG00000230337	14	14	21	20	13	13
ENSG00000198793	5587	5798	5029	5159	5164	6052
ENSG00000225602	2	1	0	1	4	1
ENSG00000253086	0	0	0	0	1	0
ENSG00000171819	0	1	7	1	4	5
ENSG00000207451	0	1	0	0	1	1
ENSG00000238173	0	0	0	0	1	1
ENSG00000120942	580	692	645	692	574	788
ENSG00000238199	4	1	4	1	3	2
ENSG00000224338	0	0	0	0	0	0
ENSG00000204624	67	58	52	20	26	43
ENSG00000235643	28	37	26	25	23	24
ENSG00000116661	339	359	346	351	274	337
ENSG00000132879	619	602	587	550	545	596
ENSG00000116663	788	829	782	589	609	673
ENSG00000116670	1362	1416	1338	1333	1146	1465
ENSG00000162490	4	6	3	8	4	8
ENSG00000177674	2310	2426	2372	1931	1749	2120
ENSG00000215910	2	0	0	1	0	0
ENSG00000177553	0	0	0	1	0	0
ENSG00000177000	591	703	597	543	516	649
ENSG00000011021	959	1030	874	906	933	977
ENSG00000242349	65	53	54	59	37	59
ENSG00000276470	0	0	0	0	0	0
ENSG00000278852	0	0	0	0	0	0
ENSG00000175206	11	9	9	12	6	4
ENSG00000275915	0	0	0	0	0	0
ENSG00000120937	0	0	0	0	1	0
ENSG00000224904	0	0	0	1	0	1
ENSG00000199347	2	4	4	0	1	4
ENSG00000201801	5	1	0	2	2	1
ENSG00000116685	2455	2750	2579	2661	2465	3113
ENSG00000083444	4725	4850	4537	4394	4091	4929
ENSG00000116688	10125	10818	9780	10302	10100	11779
ENSG00000270914	2	0	1	0	0	2
ENSG00000116691	911	1063	1029	942	970	1075
ENSG00000202461	8	15	8	6	7	9
ENSG00000276869	0	0	0	0	0	0
ENSG00000243539	0	0	0	0	1	0
ENSG00000120949	678	711	669	877	737	884
ENSG00000201135	0	0	0	0	0	0
ENSG00000227875	0	1	0	0	0	0
ENSG00000028137	218	224	200	111	122	151
ENSG00000263676	0	0	0	0	0	0
ENSG00000225196	0	0	0	0	0	0
ENSG00000252969	0	0	0	0	0	0
ENSG00000048707	3232	3321	2992	3011	3138	3411
ENSG00000239149	5	7	5	6	4	2
ENSG00000229484	0	0	0	0	0	1
ENSG00000162496	888	981	943	832	778	1015
ENSG00000221340	5	4	2	3	4	3
ENSG00000276830	1	0	1	2	1	1
ENSG00000272482	8	6	3	11	6	7
ENSG00000204518	0	0	0	0	0	0
ENSG00000226166	0	0	0	0	0	0
ENSG00000188984	0	0	0	0	0	0
ENSG00000157330	0	0	0	1	0	0
ENSG00000116726	0	0	0	0	0	0
ENSG00000116721	0	0	0	0	0	0
ENSG00000228338	0	0	0	0	0	0
ENSG00000239810	0	0	0	0	0	0
ENSG00000231103	0	0	0	0	0	0
ENSG00000179172	0	0	2	1	1	1
ENSG00000120952	0	0	0	0	0	1
ENSG00000243073	0	0	0	0	0	0
ENSG00000187545	0	0	1	0	0	0
ENSG00000204510	0	0	0	0	0	0
ENSG00000207434	0	0	0	0	0	0
ENSG00000234064	0	0	0	0	0	0
ENSG00000232423	0	0	0	0	0	0
ENSG00000274178	0	0	0	0	0	0
ENSG00000274764	0	0	0	0	0	0
ENSG00000229571	0	0	0	0	0	0
ENSG00000277058	0	0	0	0	0	0
ENSG00000277862	0	0	0	0	0	0
ENSG00000236179	0	0	0	0	0	0
ENSG00000275774	0	0	0	0	0	0
ENSG00000229978	0	0	0	0	0	0
ENSG00000233336	0	0	0	0	0	0
ENSG00000280267	0	0	0	0	0	0
ENSG00000179412	0	0	0	0	0	0
ENSG00000204505	0	0	0	0	0	0
ENSG00000279169	0	0	0	0	0	0
ENSG00000279804	0	0	0	0	0	0
ENSG00000250894	0	0	0	0	0	0
ENSG00000270601	0	0	0	0	0	0
ENSG00000231219	0	0	0	0	0	0
ENSG00000207511	0	0	0	0	0	0
ENSG00000182330	0	0	0	0	0	0
ENSG00000204501	0	0	0	0	0	0
ENSG00000237700	0	0	0	0	0	0
ENSG00000228229	0	0	0	0	0	0
ENSG00000204481	0	0	0	0	0	0
ENSG00000204480	0	0	0	0	0	0
ENSG00000204479	0	0	0	0	0	0
ENSG00000204478	0	0	0	0	0	0
ENSG00000162494	0	1	0	0	0	0
ENSG00000259961	0	0	0	0	0	0
ENSG00000215909	0	0	0	0	0	0
ENSG00000162493	928	979	862	845	780	930
ENSG00000222952	0	0	0	0	1	0
ENSG00000237445	0	1	0	0	0	0
ENSG00000253085	0	0	1	0	0	2
ENSG00000116731	2518	2555	2419	2320	2215	2561
ENSG00000189337	258	277	266	274	270	310
ENSG00000252151	0	0	0	0	0	0
ENSG00000231606	0	0	0	0	0	0
ENSG00000234593	1	1	0	0	3	0
ENSG00000235829	0	0	0	0	0	0
ENSG00000175147	56	36	48	47	60	56
ENSG00000171729	1159	1210	1075	1095	930	1173
ENSG00000204464	1	4	1	5	6	3
ENSG00000215720	1	0	3	1	2	1
ENSG00000278480	0	2	1	2	3	0
ENSG00000142621	30	35	33	25	30	36
ENSG00000233485	0	0	1	0	0	0
ENSG00000236045	0	1	0	0	0	0
ENSG00000228140	2	8	4	4	3	9
ENSG00000142634	3015	3291	3172	2869	2653	3055
ENSG00000162438	4	7	5	4	3	1
ENSG00000142615	0	2	0	1	1	1
ENSG00000215704	3	1	1	4	3	5
ENSG00000132906	286	331	310	320	265	359
ENSG00000116138	1335	1340	1210	1329	1234	1453
ENSG00000251866	1	0	0	2	2	1
ENSG00000272510	3	1	1	4	3	4
ENSG00000116771	624	697	636	805	717	882
ENSG00000237301	19	12	9	12	20	20
ENSG00000235084	16	22	8	28	12	12
ENSG00000252417	0	0	0	0	1	0
ENSG00000236500	0	0	1	0	0	0
ENSG00000197312	2835	3032	2595	2939	3037	3225
ENSG00000215695	0	0	0	0	0	0
ENSG00000271742	4	2	2	1	0	4
ENSG00000116786	4180	4307	3887	3841	3586	4413
ENSG00000237938	65	48	42	49	42	49
ENSG00000162461	100	97	83	87	96	94
ENSG00000224459	0	2	0	1	0	0
ENSG00000162460	0	3	0	0	0	1
ENSG00000162458	4482	4900	4362	4437	3982	4861
ENSG00000224321	25	30	28	19	15	16
ENSG00000233954	246	273	195	235	215	233
ENSG00000178715	7	7	4	12	9	5
ENSG00000179743	171	149	147	133	145	166
ENSG00000065526	9299	9275	7816	8337	7996	9348
ENSG00000270620	4	1	0	1	1	1
ENSG00000116809	1123	1138	1029	996	977	1026
ENSG00000234607	2	1	1	4	0	1
ENSG00000231353	0	0	0	0	0	0
ENSG00000275503	0	0	0	0	0	0
ENSG00000224966	0	0	0	0	0	1
ENSG00000183888	0	1	0	0	0	0
ENSG00000233078	0	0	0	0	0	0
ENSG00000173641	4	2	2	3	2	1
ENSG00000186510	1	0	1	3	0	2
ENSG00000232456	6	6	0	6	5	6
ENSG00000184908	23	28	26	20	22	17
ENSG00000185519	122	115	133	151	134	193
ENSG00000142627	10126	10626	9825	9245	8536	10672
ENSG00000227959	35	37	40	45	31	36
ENSG00000224621	32	23	33	29	33	30
ENSG00000234166	0	0	0	0	0	0
ENSG00000142632	435	511	469	387	432	527
ENSG00000237276	280	275	278	210	204	219
ENSG00000132881	154	213	177	231	225	232
ENSG00000233929	2	6	3	8	10	4
ENSG00000037637	1096	1187	1150	1084	1000	1211
ENSG00000055070	7719	8275	7690	8044	7356	8576
ENSG00000226457	4	3	1	1	3	3
ENSG00000187144	7	5	3	4	5	0
ENSG00000157191	2281	2418	2323	1842	1760	2043
ENSG00000226029	84	53	51	38	50	59
ENSG00000080947	185	219	168	160	166	180
ENSG00000206652	0	1	0	0	0	3
ENSG00000261135	3	13	4	4	8	11
ENSG00000224174	7	12	13	20	17	20
ENSG00000233421	14	12	12	17	8	14
ENSG00000277344	0	0	0	0	1	1
ENSG00000268991	0	0	0	0	0	0
ENSG00000225710	0	0	0	1	0	0
ENSG00000219481	613	633	602	598	590	660
ENSG00000271732	3	1	0	4	1	0
ENSG00000215908	950	949	865	877	823	1019
ENSG00000186301	101	98	100	104	85	127
ENSG00000282143	1	0	0	1	0	1
ENSG00000207513	0	0	0	0	0	0
ENSG00000237847	0	0	0	0	0	0
ENSG00000280114	0	5	1	2	3	6
ENSG00000236698	39	76	65	56	79	75
ENSG00000268869	2	3	0	4	2	2
ENSG00000279151	0	0	0	0	0	0
ENSG00000279132	0	0	0	0	0	0
ENSG00000282740	1	0	0	0	0	0
ENSG00000058453	1304	1365	1241	1220	1128	1196
ENSG00000227684	3	4	1	1	3	3
ENSG00000207389	0	0	0	0	0	0
ENSG00000186715	98	98	85	77	102	90
ENSG00000223643	0	0	0	0	0	0
ENSG00000230239	0	0	1	0	0	0
ENSG00000263811	0	0	0	0	0	0
ENSG00000228549	17	31	18	18	16	25
ENSG00000277234	0	0	0	0	0	0
ENSG00000238142	107	104	124	102	122	123
ENSG00000235241	123	113	129	132	93	135
ENSG00000207005	0	3	0	4	0	5
ENSG00000272426	5	1	3	0	1	5
ENSG00000117122	1251	1348	1198	1071	958	1223
ENSG00000226526	7	3	3	2	10	3
ENSG00000159363	2282	2488	2391	2209	2061	2451
ENSG00000117118	2763	2979	2760	3033	2729	3324
ENSG00000117115	1147	1208	1059	1326	1201	1510
ENSG00000204362	33	27	42	50	32	36
ENSG00000282843	2	2	1	1	1	3
ENSG00000142623	114	105	102	99	121	138
ENSG00000142619	249	272	230	370	366	408
ENSG00000266634	0	4	0	0	2	2
ENSG00000159339	1	1	0	0	3	4
ENSG00000280226	2	0	0	0	0	0
ENSG00000276747	0	0	0	2	0	0
ENSG00000179051	15374	17048	14759	15278	14278	17439
ENSG00000227751	0	0	0	0	0	0
ENSG00000074964	396	430	375	364	370	414
ENSG00000236648	0	0	0	0	0	1
ENSG00000117148	3	2	1	3	2	1
ENSG00000261781	0	0	0	0	0	0
ENSG00000117154	0	0	0	0	0	0
ENSG00000280222	0	0	0	0	0	0
ENSG00000230035	0	0	0	0	0	0
ENSG00000225387	0	0	0	0	0	0
ENSG00000179023	1	0	0	1	0	1
ENSG00000235282	0	0	0	0	0	0
ENSG00000225478	0	0	0	0	0	0
ENSG00000009709	0	1	0	0	0	0
ENSG00000179002	0	0	0	0	0	0
ENSG00000255275	1	4	0	1	2	1
ENSG00000159423	662	724	665	750	719	903
ENSG00000265606	0	0	0	0	0	0
ENSG00000221662	0	2	2	0	0	2
ENSG00000169991	1352	1393	1330	1487	1339	1588
ENSG00000272084	13	9	10	10	17	12
ENSG00000127481	14257	14335	11887	12168	12255	13881
ENSG00000230424	18	15	16	16	15	27
ENSG00000127463	4739	5211	4597	4841	4732	5510
ENSG00000053372	2491	2981	2811	3076	2887	3191
ENSG00000211454	25	17	12	14	12	28
ENSG00000162482	31	29	18	24	24	32
ENSG00000270728	54	47	46	47	35	43
ENSG00000053371	1219	1410	1281	1273	1209	1474
ENSG00000200403	6	3	5	2	0	4
ENSG00000040487	549	553	558	487	444	556
ENSG00000077549	7646	8369	8360	8398	7616	8937
ENSG00000240490	0	0	0	0	1	0
ENSG00000201609	0	0	0	1	0	0
ENSG00000235185	1	0	0	0	0	0
ENSG00000173436	2571	3075	2919	3338	2907	3406
ENSG00000270136	2	2	2	2	3	6
ENSG00000226396	31	34	33	18	33	26
ENSG00000158747	1104	1205	1205	1168	1106	1367
ENSG00000158748	0	0	0	3	1	0
ENSG00000162542	727	758	639	620	598	697
ENSG00000178828	0	0	0	0	0	1
ENSG00000235434	0	0	0	0	0	0
ENSG00000169914	1195	1196	1171	1034	1099	1293
ENSG00000188784	4	0	0	0	0	0
ENSG00000242688	0	0	0	0	0	0
ENSG00000188257	0	0	1	1	0	0
ENSG00000127472	0	0	0	0	0	0
ENSG00000117215	0	1	0	0	0	0
ENSG00000158786	1	2	1	0	0	2
ENSG00000227066	1	0	2	0	2	0
ENSG00000187980	0	0	0	1	0	0
ENSG00000225986	0	0	0	0	2	0
ENSG00000162543	5	6	4	4	5	7
ENSG00000228105	0	0	0	0	0	0
ENSG00000158816	0	0	0	0	0	0
ENSG00000226664	0	0	0	0	0	0
ENSG00000236963	1	1	1	0	0	2
ENSG00000226487	0	0	0	0	0	0
ENSG00000162545	5877	7040	6687	7865	7072	8593
ENSG00000090432	1470	1615	1511	1485	1465	1665
ENSG00000215520	0	0	0	0	0	0
ENSG00000183114	10	19	9	22	15	24
ENSG00000158825	114	108	97	84	71	89
ENSG00000158828	487	503	503	431	421	485
ENSG00000117242	148	172	147	156	127	174
ENSG00000244038	9009	9481	9094	9198	8636	10217
ENSG00000117245	101	86	94	83	89	133
ENSG00000235432	2	2	1	1	0	1
ENSG00000189410	1702	1963	1736	1731	1604	1865
ENSG00000233069	5	7	5	3	7	8
ENSG00000127483	11113	12253	10791	11233	10869	13194
ENSG00000075151	3771	4033	3501	3901	3810	4434
ENSG00000251914	0	0	0	0	1	0
ENSG00000221808	0	0	0	0	0	0
ENSG00000233072	1	3	1	1	0	0
ENSG00000236073	0	0	0	0	2	0
ENSG00000235112	4	6	1	1	4	1
ENSG00000117298	5175	5544	4817	4225	3926	4850
ENSG00000236936	1	1	0	0	0	1
ENSG00000231105	7	11	17	4	11	13
ENSG00000236216	2	0	0	0	0	0
ENSG00000228823	0	0	0	0	0	0
ENSG00000236009	0	0	0	0	0	1
ENSG00000227001	22	24	24	15	32	26
ENSG00000187952	4	1	2	3	4	4
ENSG00000186543	0	0	0	0	0	1
ENSG00000142794	679	694	626	632	594	721
ENSG00000176378	2	3	3	5	0	1
ENSG00000162551	46	23	34	27	18	54
ENSG00000233431	0	0	0	0	0	0
ENSG00000076864	262	290	288	248	214	286
ENSG00000090686	4229	4492	4120	3975	3882	4532
ENSG00000231978	0	2	1	0	1	1
ENSG00000187942	32	27	28	34	25	18
ENSG00000142798	5020	5170	3959	3647	3713	4439
ENSG00000232037	0	0	2	0	1	0
ENSG00000283234	4	2	1	1	4	3
ENSG00000219073	2	3	1	2	2	3
ENSG00000273610	0	0	0	0	0	0
ENSG00000201919	0	0	0	0	0	3
ENSG00000142789	0	0	0	0	0	1
ENSG00000278124	0	1	0	0	0	0
ENSG00000201273	0	0	0	0	0	0
ENSG00000228397	3	7	4	6	3	2
ENSG00000218510	311	361	325	392	308	417
ENSG00000070831	11999	13305	12399	12806	11968	13931
ENSG00000230068	15	11	14	9	17	10
ENSG00000271428	11	17	9	6	7	13
ENSG00000271840	8	7	2	3	0	5
ENSG00000162552	46	62	38	24	25	39
ENSG00000266564	0	0	0	0	0	0
ENSG00000234397	0	0	0	0	0	0
ENSG00000279625	0	0	0	0	0	0
ENSG00000184677	1468	1514	1343	1328	1306	1509
ENSG00000237200	16	4	4	8	6	6
ENSG00000070886	13	19	23	25	17	31
ENSG00000276835	0	0	0	0	0	0
ENSG00000173372	0	0	0	0	0	0
ENSG00000159189	0	0	0	0	0	0
ENSG00000173369	0	0	0	0	0	0
ENSG00000133216	2303	2580	2183	2166	2000	2441
ENSG00000265422	0	0	0	0	0	0
ENSG00000225952	2	2	0	0	0	4
ENSG00000264014	0	0	0	0	0	0
ENSG00000215906	0	0	0	0	0	2
ENSG00000227868	13	17	17	9	15	21
ENSG00000004487	6365	6734	6099	6660	6315	7201
ENSG00000240553	2	0	0	2	1	3
ENSG00000263793	0	1	0	0	0	0
ENSG00000266802	0	0	0	0	0	0
ENSG00000169641	6247	6682	5903	5830	5896	6481
ENSG00000229010	1	2	5	4	2	5
ENSG00000206935	2	1	1	2	2	1
ENSG00000252578	5	2	4	4	0	3
ENSG00000179546	35	29	34	37	27	27
ENSG00000215381	0	0	0	0	0	0
ENSG00000261326	194	171	199	201	187	202
ENSG00000125944	10067	11266	10395	11324	11039	12143
ENSG00000125945	1366	1523	1415	1454	1393	1704
ENSG00000249087	166	133	132	145	126	148
ENSG00000201405	0	0	0	0	0	0
ENSG00000271420	8	7	0	6	0	1
ENSG00000204219	341	348	349	327	330	371
ENSG00000232482	1	1	0	0	1	2
ENSG00000088280	656	685	614	756	695	819
ENSG00000007968	310	317	325	325	293	354
ENSG00000235052	5	15	13	12	9	11
ENSG00000117318	2873	3165	2962	3080	2871	3349
ENSG00000197880	5	1	1	0	0	2
ENSG00000229239	3	0	0	0	0	0
ENSG00000142676	23289	24944	24102	24091	21696	26380
ENSG00000011007	3550	3818	3483	3623	3450	4096
ENSG00000236810	79	109	89	122	99	106
ENSG00000057757	1282	1278	1329	1403	1236	1609
ENSG00000011009	4555	5024	4822	4937	4488	5093
ENSG00000117308	1917	2091	2018	2020	1988	2219
ENSG00000117305	844	901	877	805	761	951
ENSG00000179163	743	767	759	718	708	822
ENSG00000188822	2	1	1	3	3	1
ENSG00000229106	0	0	0	0	0	0
ENSG00000232557	0	0	0	0	0	0
ENSG00000264926	0	0	0	0	0	0
ENSG00000230228	1	0	0	0	1	0
ENSG00000189266	5248	5860	5528	5343	5183	5958
ENSG00000188529	6595	7235	6834	6895	6511	8028
ENSG00000215905	0	0	0	1	0	0
ENSG00000225315	1	0	1	0	2	1
ENSG00000142661	16	18	9	10	9	12
ENSG00000230703	0	0	0	0	0	0
ENSG00000142677	817	884	808	646	651	692
ENSG00000185436	1059	1159	1010	923	897	1098
ENSG00000230023	6	9	5	7	4	2
ENSG00000232298	5	7	11	7	14	13
ENSG00000158055	503	479	450	458	442	520
ENSG00000001460	923	981	963	838	858	1080
ENSG00000001461	1984	2132	1960	2154	1960	2301
ENSG00000117602	1008	1097	999	900	902	1146
ENSG00000264443	1	0	0	1	0	0
ENSG00000184454	6	4	10	15	5	11
ENSG00000227312	0	0	0	0	0	1
ENSG00000239106	0	0	0	0	0	0
ENSG00000133226	6807	7368	6545	6912	6742	8175
ENSG00000169504	6458	6903	6411	5897	5609	6514
ENSG00000238482	5	0	0	0	3	0
ENSG00000020633	33	37	32	29	34	34
ENSG00000278034	0	0	0	0	0	0
ENSG00000229162	0	0	0	1	0	0
ENSG00000261025	0	0	0	0	0	0
ENSG00000264371	0	0	0	0	0	0
ENSG00000233755	0	0	0	0	0	0
ENSG00000233419	0	0	0	0	0	0
ENSG00000231953	1	0	0	0	2	0
ENSG00000117614	1699	1793	1864	1827	1733	1865
ENSG00000117616	1947	2060	1969	1787	1777	1988
ENSG00000272432	3	7	3	5	3	5
ENSG00000261349	12	15	5	3	15	7
ENSG00000187010	13	19	26	14	11	10
ENSG00000224183	3	0	7	3	3	5
ENSG00000259984	3	0	5	0	1	1
ENSG00000183726	5312	5811	5716	5177	4655	5557
ENSG00000188672	22	31	33	25	14	28
ENSG00000238084	8	10	9	9	6	7
ENSG00000204178	771	897	757	797	768	851
ENSG00000157978	2490	2715	2392	2711	2442	3053
ENSG00000225643	4	3	4	0	3	7
ENSG00000117643	22	31	19	28	24	19
ENSG00000233478	1	0	0	0	0	1
ENSG00000162430	2403	2482	2183	2379	2075	2822
ENSG00000255054	0	0	0	0	0	0
ENSG00000228172	34	27	26	24	29	37
ENSG00000117640	649	678	648	682	607	773
ENSG00000272478	0	0	0	0	0	0
ENSG00000127423	508	554	489	549	487	602
ENSG00000236528	3	2	3	4	2	5
ENSG00000182749	1824	2003	1955	2101	1828	2384
ENSG00000207302	3	1	0	1	0	0
ENSG00000117632	10883	12028	11198	11901	10807	12638
ENSG00000229786	0	2	3	3	0	2
ENSG00000223624	2	1	1	1	1	1
ENSG00000158006	497	523	482	515	538	598
ENSG00000207237	0	0	0	2	0	0
ENSG00000252190	0	0	0	0	0	0
ENSG00000252691	0	0	0	0	0	0
ENSG00000158008	18	22	10	7	12	22
ENSG00000158014	5	12	14	12	20	22
ENSG00000158022	0	0	0	1	0	0
ENSG00000175087	364	376	304	329	295	391
ENSG00000197245	4	5	10	4	5	7
ENSG00000282872	0	0	0	0	0	0
ENSG00000236782	7	17	19	16	19	21
ENSG00000142684	85	77	71	91	86	90
ENSG00000142675	847	1029	936	808	714	865
ENSG00000188782	6	3	1	1	0	3
ENSG00000236155	1	0	0	2	1	0
ENSG00000278572	1	0	0	1	0	0
ENSG00000130695	2619	2658	2404	2486	2390	2903
ENSG00000270733	0	1	3	3	6	1
ENSG00000142669	7136	7474	6933	6722	6036	7785
ENSG00000158062	797	882	763	807	781	905
ENSG00000169442	10	6	5	4	11	8
ENSG00000176092	1720	1892	1725	1666	1534	1965
ENSG00000225854	12	3	6	8	4	4
ENSG00000176083	0	0	0	0	0	0
ENSG00000131914	3	4	1	1	2	7
ENSG00000117682	1661	1761	1632	1579	1516	1815
ENSG00000223583	7	1	1	5	2	6
ENSG00000225891	10	5	4	7	2	3
ENSG00000198830	27395	30321	29121	30278	27571	32489
ENSG00000224129	0	0	1	0	0	0
ENSG00000117676	4692	5081	4535	4582	4147	5003
ENSG00000238705	0	0	0	0	0	0
ENSG00000243905	0	0	0	1	0	0
ENSG00000252802	0	0	0	0	0	0
ENSG00000252429	0	0	0	0	0	0
ENSG00000229247	0	0	0	0	0	0
ENSG00000238316	0	0	0	0	0	0
ENSG00000235069	0	0	0	0	0	0
ENSG00000260063	33	21	15	35	25	26
ENSG00000117713	4288	4382	3975	4075	4055	4547
ENSG00000060642	578	622	572	548	519	619
ENSG00000241188	1	1	0	0	1	1
ENSG00000204160	1284	1392	1269	1211	1180	1368
ENSG00000175793	48005	51613	48754	43424	38111	45859
ENSG00000226698	0	0	0	0	0	0
ENSG00000142751	1448	1456	1458	1467	1301	1580
ENSG00000198746	955	1107	1088	1113	1024	1223
ENSG00000090273	7914	8722	8444	9218	8279	9466
ENSG00000131910	8	14	21	11	15	11
ENSG00000175707	909	1020	909	895	782	962
ENSG00000172746	2	1	2	1	2	4
ENSG00000224064	1	1	1	5	3	1
ENSG00000225294	8	4	2	2	4	0
ENSG00000253368	3585	4178	3934	3954	3697	4087
ENSG00000158246	34	22	32	26	34	42
ENSG00000280403	9	14	10	7	3	5
ENSG00000090020	4415	4886	4266	3853	3522	4473
ENSG00000229985	0	0	0	0	0	0
ENSG00000214973	0	1	1	0	1	0
ENSG00000225159	7	10	10	9	13	14
ENSG00000225990	0	0	0	0	0	0
ENSG00000224311	0	0	1	0	0	0
ENSG00000142784	2302	2341	2179	1997	1935	2419
ENSG00000252098	0	0	2	2	1	0
ENSG00000243659	4	6	1	1	6	2
ENSG00000186501	955	976	927	966	815	1078
ENSG00000206888	4	5	5	5	1	8
ENSG00000241547	25	20	16	25	14	18
ENSG00000142765	767	781	720	743	666	862
ENSG00000142733	2347	2626	2315	2210	2086	2538
ENSG00000142748	10	5	5	3	4	5
ENSG00000174950	103	93	81	76	81	108
ENSG00000231207	0	0	1	0	0	2
ENSG00000181773	207	237	213	264	239	271
ENSG00000158195	9424	9808	8600	9134	8957	10878
ENSG00000241169	1	7	1	0	2	0
ENSG00000237429	4	7	6	5	6	4
ENSG00000126705	2433	2505	2124	2119	1994	2406
ENSG00000000938	5	3	3	1	5	6
ENSG00000235912	0	2	1	7	2	5
ENSG00000233975	6	7	4	8	1	6
ENSG00000126709	82450	89067	86621	71458	64519	76139
ENSG00000225886	740	784	624	605	631	724
ENSG00000206767	0	0	0	0	0	0
ENSG00000226662	0	0	0	0	0	0
ENSG00000207095	0	0	0	0	0	0
ENSG00000009780	525	617	536	594	568	652
ENSG00000231344	3	4	4	2	2	3
ENSG00000230833	2	0	3	0	0	0
ENSG00000117758	1334	1366	1319	1263	1253	1357
ENSG00000269971	2	0	2	0	0	1
ENSG00000270031	2	1	1	5	2	4
ENSG00000223062	0	0	0	0	0	0
ENSG00000117751	2451	2695	2723	2902	2675	3086
ENSG00000252947	8	7	8	0	4	2
ENSG00000278868	0	0	0	0	0	0
ENSG00000130775	1902	1995	1805	1274	1235	1631
ENSG00000117748	2773	2982	2824	2782	2618	3133
ENSG00000130768	350	415	378	364	337	405
ENSG00000227050	0	1	0	8	0	2
ENSG00000158156	326	329	281	327	270	338
ENSG00000158161	2198	2500	2227	2359	2219	2727
ENSG00000238231	1	2	4	0	1	1
ENSG00000240750	4	5	6	7	1	3
ENSG00000228589	10	29	23	22	25	20
ENSG00000228943	0	0	0	0	1	0
ENSG00000214812	0	0	0	0	0	0
ENSG00000253005	0	1	1	0	0	0
ENSG00000169403	2330	2436	2231	1970	1780	2310
ENSG00000126698	4651	5345	5231	5447	4856	5725
ENSG00000130770	4518	4780	4524	4716	4086	4858
ENSG00000270605	101	103	85	83	89	99
ENSG00000271398	8	10	6	11	10	11
ENSG00000130766	1437	1613	1417	1468	1390	1523
ENSG00000130772	747	885	841	939	794	921
ENSG00000204138	4469	4812	4117	4380	4199	4932
ENSG00000206779	1	1	1	5	1	1
ENSG00000229820	5	8	2	3	4	5
ENSG00000221216	2	4	1	5	3	0
ENSG00000180198	4393	4890	4708	5055	4846	5691
ENSG00000242125	2257	2439	2302	2403	2443	2677
ENSG00000274266	0	0	0	0	0	0
ENSG00000200087	59	86	50	60	62	94
ENSG00000231468	10	10	12	15	14	11
ENSG00000279443	28	48	27	45	44	64
ENSG00000180098	786	832	718	734	678	789
ENSG00000197989	952	1058	997	1085	1106	1187
ENSG00000221539	37	27	34	29	22	31
ENSG00000278274	0	0	0	0	0	0
ENSG00000273544	0	0	0	0	0	0
ENSG00000274582	0	0	0	0	0	0
ENSG00000280498	0	0	0	0	0	0
ENSG00000120656	1167	1296	1195	1315	1211	1439
ENSG00000188060	22	24	28	24	27	28
ENSG00000229388	7	6	9	7	9	8
ENSG00000270103	0	0	0	0	0	0
ENSG00000274978	1	2	5	5	1	3
ENSG00000162419	1044	1054	956	1001	902	1039
ENSG00000252777	0	0	0	0	0	2
ENSG00000198492	3527	3912	3500	3575	3427	4059
ENSG00000116329	1	1	1	2	1	4
ENSG00000233427	0	1	0	0	0	1
ENSG00000199756	0	0	0	0	0	0
ENSG00000159023	1265	1392	1209	1143	1155	1301
ENSG00000225616	1	1	3	0	0	2
ENSG00000206704	0	0	0	0	2	0
ENSG00000277958	0	0	0	0	0	0
ENSG00000253304	929	996	922	907	821	973
ENSG00000225750	2	2	3	0	1	1
ENSG00000116350	7285	7928	7381	7715	7072	8253
ENSG00000277916	0	0	0	0	0	0
ENSG00000116353	638	665	599	707	624	737
ENSG00000237934	12	8	3	5	7	6
ENSG00000060656	1108	1262	1115	1137	1001	1337
ENSG00000230523	0	0	0	0	0	0
ENSG00000225011	0	0	0	0	0	0
ENSG00000228176	1	3	1	5	1	3
ENSG00000270927	0	0	0	0	0	0
ENSG00000233399	0	0	0	0	0	0
ENSG00000233372	0	0	0	0	0	0
ENSG00000231251	0	0	0	0	0	0
ENSG00000236335	0	0	0	0	0	0
ENSG00000231949	0	0	0	0	0	0
ENSG00000162510	8	17	8	11	8	12
ENSG00000186056	59	56	59	54	69	57
ENSG00000162511	4	11	9	4	9	15
ENSG00000264773	0	0	0	0	0	0
ENSG00000229607	0	0	0	0	0	0
ENSG00000223382	0	1	2	2	3	2
ENSG00000222784	0	0	0	0	0	0
ENSG00000235143	0	0	0	0	0	0
ENSG00000162512	1261	1377	1290	1279	1165	1407
ENSG00000266210	0	0	0	0	0	0
ENSG00000134644	5091	5529	4808	5068	4955	5569
ENSG00000237329	0	1	1	2	0	5
ENSG00000232768	0	2	1	1	1	1
ENSG00000215900	0	0	0	0	1	0
ENSG00000225142	0	0	0	0	0	0
ENSG00000084628	16	20	14	30	25	36
ENSG00000060688	2608	2942	2706	3054	2703	3264
ENSG00000229447	18	27	13	16	29	22
ENSG00000121766	1595	1627	1561	1678	1506	1781
ENSG00000229044	5	2	3	1	0	2
ENSG00000121769	67	63	58	55	67	51
ENSG00000168528	14896	15616	14142	14482	13284	17004
ENSG00000215899	1	2	0	1	1	0
ENSG00000206981	0	0	0	0	0	0
ENSG00000260386	0	2	0	7	1	2
ENSG00000265961	0	0	0	0	0	0
ENSG00000229167	97	101	89	101	105	108
ENSG00000142910	9117	9850	9199	9148	8605	10217
ENSG00000121764	6	6	3	1	1	3
ENSG00000162517	1922	2037	1966	1890	1752	2166
ENSG00000235790	71	68	56	52	38	62
ENSG00000264078	8	4	1	3	2	6
ENSG00000084636	3971	4355	3717	3436	3373	3616
ENSG00000121753	501	510	455	437	400	488
ENSG00000266580	2	1	0	1	0	0
ENSG00000254545	4	9	6	5	3	5
ENSG00000134668	408	469	499	364	357	404
ENSG00000203620	0	0	1	0	0	0
ENSG00000269967	8	10	3	9	10	8
ENSG00000184007	3518	3973	3573	3885	3568	4305
ENSG00000228634	6	0	5	4	4	10
ENSG00000121774	8282	9523	8761	8776	8259	9656
ENSG00000203325	8	7	6	3	6	10
ENSG00000121775	790	879	793	850	826	983
ENSG00000266203	3	0	1	0	0	0
ENSG00000276493	0	3	1	0	0	0
ENSG00000025800	5033	5363	4767	5226	4931	5933
ENSG00000250135	0	0	0	0	0	0
ENSG00000084652	6613	7213	6549	6458	6175	6946
ENSG00000160050	300	396	325	344	309	379
ENSG00000224066	15	11	8	3	11	7
ENSG00000160051	342	327	304	307	342	364
ENSG00000222046	10	9	10	9	10	7
ENSG00000160055	439	405	406	380	321	423
ENSG00000084623	7055	7337	7179	7581	7058	8349
ENSG00000220785	83	104	88	90	70	84
ENSG00000183615	41	43	54	38	39	60
ENSG00000182866	2	2	3	1	3	5
ENSG00000277617	0	0	0	0	0	0
ENSG00000252450	0	1	0	0	0	0
ENSG00000116478	9456	10375	9657	9754	8961	10805
ENSG00000175130	3528	3671	3571	2859	2682	3280
ENSG00000233775	3	3	2	0	0	0
ENSG00000162526	16	12	9	22	21	13
ENSG00000225828	94	98	75	72	83	96
ENSG00000160058	2526	2634	2542	2255	2229	2502
ENSG00000224333	0	0	0	0	0	0
ENSG00000270850	0	0	0	0	0	0
ENSG00000229259	0	0	0	1	0	0
ENSG00000263529	0	0	0	0	0	0
ENSG00000254553	1	0	0	1	2	2
ENSG00000273274	32	27	25	24	17	32
ENSG00000160062	467	497	441	483	428	561
ENSG00000176261	1146	1231	1160	1258	1249	1322
ENSG00000200591	2	1	3	12	1	6
ENSG00000162521	7773	8252	7642	7704	7202	8897
ENSG00000162520	35	30	33	29	17	22
ENSG00000224409	11	14	10	12	15	11
ENSG00000162522	8890	9407	8167	8416	7638	9444
ENSG00000134684	6545	7218	6627	7177	6461	7994
ENSG00000116497	2039	2102	1860	1916	1920	2208
ENSG00000160097	20	20	33	32	24	16
ENSG00000121905	16	19	26	16	10	15
ENSG00000121900	2467	2716	2559	2292	2148	2607
ENSG00000116514	3555	3862	3380	2841	2711	3244
ENSG00000278966	8	6	5	5	10	13
ENSG00000217644	5	7	2	2	1	7
ENSG00000239670	5	11	15	12	14	11
ENSG00000236065	8	3	2	3	1	3
ENSG00000004455	9596	10548	10176	10697	9896	11295
ENSG00000276645	1	3	2	1	1	0
ENSG00000142920	176	178	162	135	123	171
ENSG00000278997	13	11	13	10	5	10
ENSG00000116525	259	304	263	227	232	257
ENSG00000279179	26	20	18	33	29	16
ENSG00000160094	712	774	711	725	679	767
ENSG00000270115	5	8	3	6	2	9
ENSG00000184389	36	41	34	36	50	39
ENSG00000225313	241	274	242	242	273	286
ENSG00000134686	2813	2998	2703	2756	2468	3045
ENSG00000222112	26	12	27	26	32	27
ENSG00000233246	6	12	11	7	7	7
ENSG00000234512	0	0	0	0	0	0
ENSG00000121903	288	316	268	288	259	336
ENSG00000235907	5	1	1	5	1	3
ENSG00000121904	0	0	4	5	1	1
ENSG00000227000	0	0	0	0	0	0
ENSG00000176256	0	0	0	0	0	0
ENSG00000231163	0	0	0	0	0	0
ENSG00000201148	0	0	0	0	0	0
ENSG00000142698	0	0	0	0	0	0
ENSG00000270241	0	0	0	0	0	0
ENSG00000207941	0	0	0	0	0	0
ENSG00000163866	1803	1781	1778	1798	1734	2037
ENSG00000189280	2671	2859	2621	2457	2217	2869
ENSG00000189433	90	106	109	60	71	76
ENSG00000255811	0	0	0	0	0	0
ENSG00000188910	5514	6080	5679	5000	4517	5734
ENSG00000187513	2	1	4	2	2	2
ENSG00000230163	52	48	29	49	43	48
ENSG00000116544	14	6	18	7	15	12
ENSG00000241014	47	70	53	63	71	60
ENSG00000271741	27	21	17	22	28	27
ENSG00000243749	299	342	379	321	291	373
ENSG00000163867	455	557	466	527	470	692
ENSG00000233940	0	0	0	0	0	0
ENSG00000197056	1436	1668	1361	1684	1536	1752
ENSG00000228348	0	0	1	0	0	1
ENSG00000116560	13517	15175	13347	14543	14021	16185
ENSG00000201868	0	0	0	0	0	0
ENSG00000146463	2950	3174	2833	3020	2748	3329
ENSG00000240374	0	0	0	0	0	1
ENSG00000201542	0	0	0	0	1	1
ENSG00000229994	4	4	2	9	10	7
ENSG00000227409	0	1	2	1	1	2
ENSG00000278702	0	0	0	0	0	0
ENSG00000142687	1984	2112	1845	1996	1814	2226
ENSG00000236274	0	0	0	0	1	1
ENSG00000020129	1700	1733	1592	1634	1592	1889
ENSG00000239636	26	11	24	8	10	12
ENSG00000116819	44	36	28	40	23	43
ENSG00000126067	6578	7198	7003	6984	6182	7808
ENSG00000142686	770	881	759	756	743	806
ENSG00000092853	3392	3619	3227	3336	3183	3463
ENSG00000232335	1	2	1	3	2	1
ENSG00000134698	861	905	827	761	674	908
ENSG00000092847	1826	1946	1682	1887	1785	2143
ENSG00000271164	0	0	0	0	0	0
ENSG00000271914	0	0	0	0	0	0
ENSG00000126070	1897	1966	1652	1865	1667	2072
ENSG00000271554	9	12	5	22	6	13
ENSG00000232862	6	7	5	8	12	7
ENSG00000092850	41	39	43	34	38	38
ENSG00000116863	1499	1692	1628	1398	1330	1561
ENSG00000171812	574	604	510	492	518	619
ENSG00000054116	2699	3097	2770	2915	2592	3061
ENSG00000116871	12917	14394	13243	12354	11278	13227
ENSG00000264592	1	0	1	0	1	0
ENSG00000054118	8785	9460	8771	8890	8932	9752
ENSG00000231849	5	0	0	1	3	0
ENSG00000214193	1523	1549	1423	1304	1366	1543
ENSG00000142694	570	608	573	489	515	568
ENSG00000116883	451	512	457	370	416	401
ENSG00000196182	589	621	586	571	558	621
ENSG00000181817	597	678	658	797	647	779
ENSG00000222821	0	0	0	0	0	0
ENSG00000116885	150	174	161	189	153	190
ENSG00000201448	1	0	0	0	1	0
ENSG00000116898	2628	2892	2767	2898	2737	3071
ENSG00000119535	0	1	0	0	0	0
ENSG00000230214	0	0	0	0	0	0
ENSG00000234481	0	0	0	0	0	0
ENSG00000163873	0	0	0	0	0	0
ENSG00000264698	0	0	0	0	0	0
ENSG00000207328	0	0	0	0	0	0
ENSG00000223944	0	0	0	0	0	0
ENSG00000252368	0	0	0	0	0	0
ENSG00000230451	0	0	0	0	0	0
ENSG00000233621	146	123	152	86	77	80
ENSG00000163874	2347	2341	2070	1034	1046	1178
ENSG00000163875	1375	1484	1231	1482	1318	1661
ENSG00000263675	16	11	4	3	9	9
ENSG00000163877	1009	1224	1043	1007	957	1140
ENSG00000232273	6	5	5	5	5	8
ENSG00000237749	3	2	0	0	0	0
ENSG00000163879	8	16	10	5	7	7
ENSG00000134697	3679	3811	3801	3867	3684	4469
ENSG00000169218	0	0	0	1	0	0
ENSG00000116922	806	854	820	883	882	1006
ENSG00000134690	3198	3659	3289	3367	3208	4124
ENSG00000183317	17	13	16	10	18	17
ENSG00000200421	0	0	0	0	0	0
ENSG00000214141	0	0	0	0	0	0
ENSG00000227416	0	0	0	0	0	0
ENSG00000185090	431	524	461	514	457	594
ENSG00000233728	0	0	0	0	0	0
ENSG00000196449	607	755	623	768	658	797
ENSG00000197982	1279	1433	1418	1446	1331	1419
ENSG00000188786	2297	2515	2156	2203	2102	2392
ENSG00000235673	2	0	0	0	4	1
ENSG00000204084	429	551	455	521	434	528
ENSG00000230955	0	0	0	0	0	0
ENSG00000252448	0	0	1	0	1	0
ENSG00000222282	0	1	0	0	0	2
ENSG00000277168	0	1	0	0	0	0
ENSG00000183431	5382	6014	5401	5721	5282	6131
ENSG00000212541	4	13	5	6	16	9
ENSG00000183386	650	749	725	683	678	799
ENSG00000183520	1980	2266	2087	2170	2082	2396
ENSG00000185668	12	19	24	24	13	25
ENSG00000224592	10	20	15	11	13	16
ENSG00000223589	0	0	0	0	0	0
ENSG00000265596	0	0	0	0	0	0
ENSG00000237290	1	1	0	0	0	1
ENSG00000275350	0	0	0	0	0	0
ENSG00000200796	0	0	0	0	0	0
ENSG00000238063	0	0	0	0	0	0
ENSG00000215895	4	2	4	2	0	1
ENSG00000116954	1085	1260	1172	1036	941	1148
ENSG00000273637	0	1	0	0	0	2
ENSG00000228436	13	14	21	20	14	11
ENSG00000214114	1275	1390	1329	1435	1415	1508
ENSG00000274944	17	11	24	14	15	17
ENSG00000131233	4	2	0	2	4	3
ENSG00000158315	543	644	568	334	317	394
ENSG00000199963	0	0	2	0	0	0
ENSG00000207466	0	0	0	0	0	0
ENSG00000235549	0	1	0	0	0	2
ENSG00000174574	3484	3850	3472	3354	3262	3941
ENSG00000168653	4468	4863	4637	4864	4211	5011
ENSG00000127603	17664	17230	15258	16012	16444	17874
ENSG00000206654	0	1	2	0	4	1
ENSG00000222378	0	0	6	1	2	1
ENSG00000270040	0	0	1	1	1	0
ENSG00000226438	1	5	0	2	0	5
ENSG00000217897	1	2	1	1	1	0
ENSG00000183682	5	11	5	6	12	14
ENSG00000237624	33	49	55	51	27	37
ENSG00000182109	25	39	32	31	28	36
ENSG00000243970	13	7	0	11	16	15
ENSG00000090621	6607	7570	6966	7874	7507	8669
ENSG00000228060	41	26	35	34	37	36
ENSG00000201457	11	9	9	10	11	9
ENSG00000163909	51	39	50	32	29	73
ENSG00000225903	0	0	0	1	0	1
ENSG00000116981	2	3	5	4	1	2
ENSG00000116983	119	117	138	107	107	125
ENSG00000084072	2361	2504	2373	2428	2380	2672
ENSG00000225333	0	1	0	0	0	0
ENSG00000252413	0	0	0	0	0	0
ENSG00000116985	170	177	147	173	142	176
ENSG00000198754	38	36	34	25	39	48
ENSG00000261798	15	9	9	5	9	4
ENSG00000229213	0	0	0	0	0	2
ENSG00000043514	1157	1215	1157	1315	1162	1411
ENSG00000202222	1	0	0	1	0	0
ENSG00000116990	214	257	211	231	207	293
ENSG00000236546	0	3	1	0	2	1
ENSG00000207356	0	0	0	0	0	0
ENSG00000168389	770	765	764	691	626	761
ENSG00000228477	27	30	29	29	28	35
ENSG00000131236	15657	16863	15839	15272	14456	16602
ENSG00000131238	5839	6363	5815	6102	5711	6867
ENSG00000226745	0	0	0	0	0	0
ENSG00000117000	1944	1989	1686	1788	1701	2004
ENSG00000207508	3	3	1	4	2	1
ENSG00000188800	4	3	4	2	4	1
ENSG00000259943	215	202	189	207	213	216
ENSG00000084073	3453	3931	3511	3737	3569	4030
ENSG00000231296	3	11	2	4	5	2
ENSG00000049089	27	39	32	22	11	34
ENSG00000227311	0	0	0	0	0	0
ENSG00000084070	1289	1348	1259	1318	1295	1531
ENSG00000213172	0	0	0	0	0	0
ENSG00000187801	140	113	126	138	153	162
ENSG00000260920	82	102	73	85	88	92
ENSG00000279667	0	3	2	2	0	10
ENSG00000187815	179	228	168	220	174	256
ENSG00000238287	40	35	21	31	26	35
ENSG00000164002	524	604	505	494	480	588
ENSG00000227278	0	0	0	1	0	1
ENSG00000238186	28	27	22	45	24	29
ENSG00000117010	209	220	191	212	182	225
ENSG00000236505	1	0	1	0	0	0
ENSG00000233910	0	0	0	0	0	0
ENSG00000117016	131	154	138	144	107	138
ENSG00000237899	5	8	7	19	7	10
ENSG00000272145	52	72	56	72	62	70
ENSG00000066136	1327	1481	1325	1342	1374	1610
ENSG00000198974	0	0	0	0	0	0
ENSG00000207962	0	0	0	0	1	3
ENSG00000117013	11	19	17	18	15	18
ENSG00000264582	0	0	0	0	0	0
ENSG00000179862	2192	2702	2573	2128	2049	2281
ENSG00000229528	0	2	1	1	0	2
ENSG00000228940	0	0	0	0	0	0
ENSG00000233118	0	0	0	0	0	0
ENSG00000171793	3928	4093	4109	4019	3854	4387
ENSG00000281207	148	164	142	165	167	152
ENSG00000171790	62	58	58	64	44	56
ENSG00000010803	991	986	832	952	942	1131
ENSG00000215893	0	0	0	1	1	2
ENSG00000235358	2	0	0	0	0	0
ENSG00000213987	0	0	0	0	0	0
ENSG00000204060	40	36	39	31	44	50
ENSG00000229901	1	4	2	3	5	7
ENSG00000252563	0	0	0	0	0	0
ENSG00000127129	49	47	49	34	21	37
ENSG00000127124	122	164	112	99	125	155
ENSG00000230881	1	0	1	0	0	0
ENSG00000230638	25	15	17	29	18	22
ENSG00000227538	0	0	0	0	0	0
ENSG00000228776	0	0	0	0	0	0
ENSG00000044012	0	0	0	0	0	0
ENSG00000197273	0	0	0	0	0	0
ENSG00000198815	2432	2418	2278	2310	2182	2622
ENSG00000227527	4	1	1	1	4	5
ENSG00000177181	3	12	7	3	2	4
ENSG00000235002	0	0	0	0	0	0
ENSG00000066185	27	42	18	22	26	32
ENSG00000127125	1464	1548	1452	1440	1321	1572
ENSG00000186409	61	66	49	59	50	64
ENSG00000230116	0	0	0	0	0	1
ENSG00000236876	1	1	0	1	1	0
ENSG00000200254	0	0	0	0	0	0
ENSG00000236180	0	0	0	0	0	0
ENSG00000171960	1894	2085	1898	2048	1890	2319
ENSG00000234917	7	8	6	8	2	8
ENSG00000065978	41167	48481	47313	51424	46283	53961
ENSG00000164007	0	1	1	1	0	0
ENSG00000117385	1241	1398	1236	1158	1155	1318
ENSG00000164008	80	58	65	44	64	60
ENSG00000283580	8	16	12	4	13	16
ENSG00000228452	36	54	38	29	41	38
ENSG00000274386	12	16	20	22	27	16
ENSG00000177868	307	410	377	348	345	367
ENSG00000164010	274	372	314	319	277	364
ENSG00000228192	149	187	177	175	144	181
ENSG00000164011	417	462	422	472	408	469
ENSG00000233708	0	0	0	1	0	1
ENSG00000237090	0	0	0	0	0	0
ENSG00000225099	0	0	0	0	0	0
ENSG00000117394	6740	7199	6256	6565	5997	7453
ENSG00000227533	21	31	11	16	19	24
ENSG00000207256	0	0	0	0	0	0
ENSG00000283136	0	0	0	0	0	0
ENSG00000277513	0	0	0	0	0	0
ENSG00000186973	6	4	3	7	1	7
ENSG00000117395	2793	3059	3201	3430	3186	3711
ENSG00000243710	38	40	25	46	62	52
ENSG00000199240	0	0	0	1	0	0
ENSG00000179178	154	165	161	126	115	168
ENSG00000253313	315	357	299	331	277	405
ENSG00000066056	1	2	3	4	5	1
ENSG00000117400	28	34	16	23	19	22
ENSG00000234694	106	118	107	137	114	139
ENSG00000117399	8227	9362	8415	9499	8828	10713
ENSG00000066322	3774	4010	3903	3862	3540	4217
ENSG00000159479	1511	1551	1567	1532	1486	1726
ENSG00000229431	74	80	46	70	51	67
ENSG00000198198	2510	2443	2102	2066	2098	2406
ENSG00000229372	5	7	11	6	2	1
ENSG00000274975	0	0	0	0	0	0
ENSG00000178922	736	858	766	733	726	793
ENSG00000229348	9	16	6	15	12	11
ENSG00000142949	15329	15789	14132	13892	13733	15995
ENSG00000066135	2798	3226	2839	2819	2777	3179
ENSG00000236200	136	185	135	140	126	139
ENSG00000126091	431	429	416	392	405	469
ENSG00000229444	5	0	1	1	0	2
ENSG00000283414	1	2	0	0	1	0
ENSG00000233674	1	0	2	2	2	7
ENSG00000283477	0	0	0	0	0	0
ENSG00000224751	2	1	2	4	1	2
ENSG00000117407	2338	2586	2353	2545	2317	2642
ENSG00000237950	47	53	43	54	50	50
ENSG00000117408	2410	2629	2228	2351	2306	2645
ENSG00000132768	1104	1159	1124	1129	1094	1303
ENSG00000117410	3079	3514	3191	3140	2828	3458
ENSG00000117411	1734	1937	1818	1887	1675	2197
ENSG00000159214	1109	1212	1090	745	634	759
ENSG00000196517	1202	1153	1071	915	924	1138
ENSG00000230615	106	101	81	79	68	110
ENSG00000227163	4	5	1	0	1	1
ENSG00000271647	0	0	6	0	0	0
ENSG00000239560	0	0	0	0	0	0
ENSG00000171872	7	18	10	12	11	10
ENSG00000233514	1	0	1	4	1	1
ENSG00000283039	0	0	0	0	1	1
ENSG00000226804	0	1	0	0	0	0
ENSG00000200171	0	0	0	0	0	0
ENSG00000238037	0	2	1	1	0	0
ENSG00000227994	0	0	0	0	0	0
ENSG00000271329	3	2	2	2	1	2
ENSG00000178028	1347	1498	1315	1342	1263	1361
ENSG00000117419	1542	1663	1599	1616	1516	1891
ENSG00000233602	5	8	8	5	10	11
ENSG00000199385	0	0	0	0	0	0
ENSG00000187147	2338	2630	2514	2557	2440	2926
ENSG00000263381	0	0	0	0	0	0
ENSG00000126106	235	216	212	209	188	238
ENSG00000198520	21	15	22	22	24	22
ENSG00000199377	1	0	3	0	0	2
ENSG00000200169	5	8	2	1	9	6
ENSG00000142945	5847	6317	5971	6177	5880	6770
ENSG00000225721	35	31	35	36	29	41
ENSG00000142937	21796	23789	23077	24751	21706	26187
ENSG00000264294	0	0	0	0	0	0
ENSG00000200913	24	36	17	28	27	28
ENSG00000202031	3	5	4	7	6	8
ENSG00000281859	0	0	0	0	0	0
ENSG00000207421	0	0	0	0	0	0
ENSG00000234093	1	0	3	7	10	11
ENSG00000142959	75	90	89	107	93	95
ENSG00000173846	939	1044	1003	924	769	918
ENSG00000188396	32	26	27	21	22	32
ENSG00000222009	251	269	286	190	176	200
ENSG00000117425	25	33	26	23	24	31
ENSG00000202444	0	0	0	0	0	0
ENSG00000226499	6	2	4	4	0	1
ENSG00000070785	916	1123	1069	1211	1067	1279
ENSG00000253039	1	0	0	1	1	0
ENSG00000229815	0	0	0	1	0	2
ENSG00000232369	1	1	7	4	2	5
ENSG00000268949	2	4	4	7	6	7
ENSG00000126107	1569	1655	1474	1370	1387	1576
ENSG00000126088	2494	2811	2785	2887	2636	3074
ENSG00000162415	19	30	33	18	24	31
ENSG00000234315	0	0	0	0	2	0
ENSG00000281912	13	15	17	13	7	17
ENSG00000186603	347	373	378	394	414	457
ENSG00000132781	798	776	688	771	678	798
ENSG00000132773	636	668	622	628	589	699
ENSG00000070759	263	307	278	220	210	278
ENSG00000236872	5	4	1	0	1	0
ENSG00000280670	74	54	61	80	53	71
ENSG00000132763	598	663	605	780	649	828
ENSG00000117450	14015	15189	14589	15710	14669	16804
ENSG00000234379	0	0	3	0	0	0
ENSG00000117448	1859	2043	1862	1957	1799	2240
ENSG00000281133	2	2	0	0	0	0
ENSG00000280836	0	2	0	1	0	0
ENSG00000132780	8775	9710	8964	9098	8697	9717
ENSG00000281112	0	0	0	0	0	0
ENSG00000281825	0	0	0	3	0	0
ENSG00000159588	55	71	60	63	73	66
ENSG00000159592	4294	4577	4262	4403	4185	4859
ENSG00000225447	22	9	14	26	21	19
ENSG00000234329	25	23	17	12	21	13
ENSG00000159596	1627	1729	1672	1660	1615	1865
ENSG00000197429	744	778	722	820	746	834
ENSG00000230896	43	62	52	60	62	60
ENSG00000236111	0	0	0	0	0	0
ENSG00000086015	3019	3152	2731	2874	2736	3350
ENSG00000232467	0	0	0	0	0	0
ENSG00000117461	917	937	802	992	920	1134
ENSG00000278139	0	0	0	0	0	0
ENSG00000226957	0	0	1	2	4	1
ENSG00000233114	0	2	0	1	0	1
ENSG00000227857	4	3	10	5	3	8
ENSG00000117472	3119	3453	3160	3511	3202	3918
ENSG00000250719	0	0	0	0	0	0
ENSG00000085998	3131	3319	3212	3228	2958	3396
ENSG00000171357	45	36	46	52	49	46
ENSG00000085999	1706	1838	1649	1551	1600	1935
ENSG00000132128	2591	2683	2484	2534	2453	3004
ENSG00000173660	8373	9289	9142	9488	8533	9845
ENSG00000117481	1276	1489	1289	1379	1279	1489
ENSG00000225779	1	0	2	2	2	4
ENSG00000117480	335	376	383	365	333	370
ENSG00000232022	59	44	51	39	54	42
ENSG00000224863	2	4	4	6	1	2
ENSG00000197587	8	8	8	10	12	6
ENSG00000282881	0	1	0	0	0	0
ENSG00000269956	37	32	28	34	21	32
ENSG00000162456	0	0	0	0	2	0
ENSG00000079277	1665	1766	1736	1575	1471	1854
ENSG00000142961	1562	1604	1607	1270	1212	1465
ENSG00000123472	1582	1841	1793	1792	1628	2010
ENSG00000233647	3	1	1	1	0	2
ENSG00000186118	3	3	4	2	3	1
ENSG00000228237	13	13	8	10	9	14
ENSG00000159658	4835	5111	4490	4587	4554	5418
ENSG00000236476	0	0	0	0	0	0
ENSG00000142973	3	4	2	1	3	6
ENSG00000154198	0	0	0	0	0	0
ENSG00000238145	0	0	0	0	0	0
ENSG00000187048	0	0	0	0	1	0
ENSG00000259832	0	0	0	0	0	0
ENSG00000261196	0	0	0	0	0	0
ENSG00000261593	0	0	0	0	0	0
ENSG00000261290	0	0	0	0	0	0
ENSG00000186377	2	6	3	2	2	1
ENSG00000186160	3	4	1	2	3	2
ENSG00000225154	0	0	0	0	0	0
ENSG00000225506	35	44	33	39	49	43
ENSG00000162365	0	1	1	2	2	0
ENSG00000225514	0	0	0	0	0	0
ENSG00000224805	20	30	22	24	30	33
ENSG00000162366	21	13	15	2	2	1
ENSG00000162367	1	2	0	1	2	1
ENSG00000226252	0	0	0	0	0	0
ENSG00000123473	2625	3018	2547	2629	2422	2946
ENSG00000162368	4694	5425	4956	5290	4962	5624
ENSG00000225762	9	8	3	6	4	4
ENSG00000186790	8	2	6	14	13	12
ENSG00000237424	99	78	83	83	96	110
ENSG00000186564	46	55	40	35	42	48
ENSG00000271355	0	0	0	0	0	0
ENSG00000229554	0	0	0	0	0	0
ENSG00000227883	0	0	0	0	0	0
ENSG00000227947	0	0	0	0	0	0
ENSG00000269113	0	0	0	0	0	0
ENSG00000223814	0	0	0	0	0	0
ENSG00000225028	0	0	0	0	0	0
ENSG00000226133	0	0	0	0	0	0
ENSG00000231413	0	0	0	0	0	0
ENSG00000237180	0	0	0	0	0	0
ENSG00000242267	1	0	0	0	0	0
ENSG00000279096	0	0	0	0	0	0
ENSG00000223720	0	0	0	0	0	0
ENSG00000117834	0	2	2	2	0	4
ENSG00000272491	0	1	0	0	0	0
ENSG00000279214	0	0	0	0	0	0
ENSG00000132122	34	40	35	34	33	48
ENSG00000224986	0	0	0	0	0	0
ENSG00000206700	0	0	0	0	0	0
ENSG00000235105	1	0	1	1	1	0
ENSG00000223175	0	0	0	0	0	0
ENSG00000232514	0	0	0	0	0	0
ENSG00000186094	0	0	0	0	0	0
ENSG00000162373	0	0	0	0	0	0
ENSG00000229846	0	0	0	0	0	0
ENSG00000230114	0	0	0	0	0	0
ENSG00000225623	0	0	0	0	0	0
ENSG00000237478	0	0	0	0	0	0
ENSG00000215887	0	0	0	1	0	0
ENSG00000279324	0	0	0	0	0	0
ENSG00000233595	0	0	0	0	0	0
ENSG00000162374	0	0	0	0	0	0
ENSG00000230828	0	0	0	0	0	0
ENSG00000237337	0	0	0	0	0	0
ENSG00000233407	0	0	0	0	0	0
ENSG00000234080	1	0	0	0	0	0
ENSG00000229316	0	0	0	0	0	0
ENSG00000225671	0	1	0	0	0	0
ENSG00000142700	1	0	0	0	0	0
ENSG00000185104	1688	1871	1727	1791	1726	2074
ENSG00000225767	2	3	1	1	1	5
ENSG00000207194	0	0	0	0	0	1
ENSG00000230585	3	2	5	4	3	6
ENSG00000237130	1	0	0	1	0	0
ENSG00000123080	1001	1056	995	1124	1060	1269
ENSG00000265538	0	0	0	0	0	0
ENSG00000275816	0	0	0	0	0	0
ENSG00000204006	0	0	0	0	0	0
ENSG00000200262	0	0	0	0	0	0
ENSG00000213478	1	0	1	0	0	0
ENSG00000203356	0	0	0	1	1	1
ENSG00000123091	2157	2305	2113	2167	1985	2469
ENSG00000233406	3	4	2	9	3	2
ENSG00000236434	5	5	1	3	3	7
ENSG00000085831	41	54	49	38	38	59
ENSG00000261664	2	0	0	0	2	0
ENSG00000085832	1804	1892	1649	1788	1775	1845
ENSG00000232027	1	5	4	2	0	7
ENSG00000206595	0	0	0	0	0	0
ENSG00000238140	2	3	3	1	3	2
ENSG00000227070	8	12	10	3	4	4
ENSG00000252032	0	0	0	0	0	0
ENSG00000227742	0	4	5	0	0	0
ENSG00000117859	3247	3341	3171	3285	3097	3769
ENSG00000236973	0	1	1	0	0	0
ENSG00000232846	2	0	0	1	0	0
ENSG00000212624	0	0	0	0	0	0
ENSG00000078618	8846	9486	8828	8856	8514	9753
ENSG00000266993	42	53	47	39	50	42
ENSG00000272175	1	3	3	1	0	1
ENSG00000230604	0	4	1	2	2	6
ENSG00000169213	969	996	891	870	782	966
ENSG00000200839	1	0	0	0	0	1
ENSG00000229032	0	0	1	0	0	1
ENSG00000264613	0	0	0	0	0	0
ENSG00000117862	2916	3048	2781	3043	2742	3357
ENSG00000198841	452	557	453	484	432	567
ENSG00000223390	2	1	1	3	4	2
ENSG00000228369	1	1	4	8	0	3
ENSG00000134717	2155	2390	2327	2417	2216	2713
ENSG00000157077	1639	1711	1629	1535	1447	1770
ENSG00000241745	0	0	0	1	0	1
ENSG00000228407	6	7	5	4	5	5
ENSG00000223429	2	0	1	2	2	0
ENSG00000224255	2	1	5	0	4	3
ENSG00000236004	0	1	0	0	0	0
ENSG00000237663	0	0	0	1	0	0
ENSG00000213735	0	2	0	1	2	0
ENSG00000154222	1984	2200	2060	1937	1827	2146
ENSG00000272100	14	13	7	9	16	13
ENSG00000224680	9	4	4	8	5	11
ENSG00000085840	1307	1412	1255	1271	1154	1432
ENSG00000134748	2328	2568	2286	2284	2321	2643
ENSG00000134744	2265	2348	2066	2127	2116	2486
ENSG00000272371	0	1	1	0	1	0
ENSG00000236290	1	0	0	2	1	0
ENSG00000116157	38	28	15	27	23	24
ENSG00000182183	110	121	105	107	120	116
ENSG00000162377	2353	2599	2447	2779	2628	3011
ENSG00000233664	0	0	0	0	0	0
ENSG00000239640	0	0	0	0	0	0
ENSG00000162378	1434	1435	1200	1377	1337	1558
ENSG00000252018	1	0	0	0	0	0
ENSG00000228929	3	3	3	3	3	4
ENSG00000206627	0	1	0	6	2	1
ENSG00000203995	578	610	598	577	618	714
ENSG00000242391	6	6	9	3	11	9
ENSG00000121310	1816	2007	1733	1728	1675	2044
ENSG00000230953	29	30	28	21	22	33
ENSG00000231866	0	0	0	0	0	0
ENSG00000116171	2470	2749	2443	2546	2424	2933
ENSG00000264834	0	0	0	0	0	0
ENSG00000266188	0	0	0	0	0	0
ENSG00000265815	0	0	0	0	0	0
ENSG00000237279	0	0	0	0	0	0
ENSG00000236360	1	1	4	1	0	1
ENSG00000226147	1	0	0	1	0	0
ENSG00000279054	0	0	0	1	2	1
ENSG00000174348	0	2	0	0	0	0
ENSG00000232993	0	0	0	0	0	0
ENSG00000227644	0	0	0	0	0	0
ENSG00000162383	0	0	1	1	0	0
ENSG00000235563	0	0	0	0	0	0
ENSG00000277397	0	0	0	0	0	0
ENSG00000157184	820	882	779	780	756	946
ENSG00000236723	9	15	6	11	8	9
ENSG00000162384	989	1095	1042	1053	928	1202
ENSG00000259818	6	3	4	8	2	4
ENSG00000162385	3152	3487	3332	3565	3159	3739
ENSG00000226754	8	8	13	10	8	20
ENSG00000157193	1249	1349	1131	1405	1264	1546
ENSG00000234578	0	2	0	0	0	1
ENSG00000228838	1	2	1	4	2	2
ENSG00000225030	2	3	6	1	0	1
ENSG00000232762	9	10	5	10	9	14
ENSG00000225675	7	1	3	1	2	6
ENSG00000226938	0	0	0	0	0	0
ENSG00000230138	0	0	0	0	0	0
ENSG00000236253	0	0	0	0	0	0
ENSG00000143006	0	0	0	0	0	0
ENSG00000174332	1	1	0	0	2	0
ENSG00000239007	0	0	0	0	0	0
ENSG00000058804	3043	3174	2935	3477	3215	3876
ENSG00000201003	0	0	1	1	3	3
ENSG00000229687	0	0	0	0	0	0
ENSG00000058799	700	793	699	741	650	807
ENSG00000211452	20	14	10	5	8	13
ENSG00000081870	1241	1318	1240	1179	1139	1348
ENSG00000116212	2163	2302	2135	2259	1966	2392
ENSG00000219102	6	7	4	3	6	6
ENSG00000203985	0	0	2	0	1	0
ENSG00000116209	4402	4788	4459	4336	4318	5150
ENSG00000280378	3	13	14	8	9	11
ENSG00000116205	725	846	724	678	755	820
ENSG00000225183	2	1	2	0	1	1
ENSG00000279049	0	0	0	0	0	0
ENSG00000256407	0	0	0	1	2	2
ENSG00000157211	0	0	0	0	0	0
ENSG00000280425	2	1	0	0	1	2
ENSG00000215883	270	322	316	282	304	388
ENSG00000116221	3553	3779	3536	3836	3554	4250
ENSG00000157216	1263	1297	1246	1132	1078	1305
ENSG00000198711	28	31	26	38	16	22
ENSG00000225632	0	0	0	0	3	0
ENSG00000232245	0	0	0	0	0	0
ENSG00000235741	11	8	5	14	11	12
ENSG00000237173	0	0	0	0	0	0
ENSG00000227453	0	0	0	0	0	0
ENSG00000162390	441	471	405	390	372	473
ENSG00000162391	34	31	43	23	27	42
ENSG00000230728	0	0	1	0	0	1
ENSG00000184313	1	1	1	0	1	2
ENSG00000271723	0	0	0	0	0	0
ENSG00000243725	422	470	418	524	476	519
ENSG00000162396	280	359	266	349	274	351
ENSG00000006555	657	753	674	689	723	780
ENSG00000237453	4	6	4	3	2	1
ENSG00000162398	3	1	3	5	6	4
ENSG00000116133	15404	16582	14531	14812	14001	16958
ENSG00000242396	32	27	32	22	24	22
ENSG00000233203	7	5	6	18	13	13
ENSG00000143001	15	6	21	12	12	8
ENSG00000233271	0	0	0	0	0	0
ENSG00000162399	1	4	0	0	3	1
ENSG00000169174	8745	9187	8295	8248	7584	9437
ENSG00000162402	4486	4753	4122	4428	4380	5191
ENSG00000231090	0	0	0	0	0	0
ENSG00000231095	0	0	0	0	0	0
ENSG00000265822	0	0	0	0	0	0
ENSG00000231900	0	0	0	0	0	0
ENSG00000232198	0	0	0	0	0	0
ENSG00000199831	0	0	0	0	0	0
ENSG00000252162	0	0	0	0	0	0
ENSG00000272051	0	0	0	0	0	0
ENSG00000234810	0	0	0	0	0	0
ENSG00000230250	0	0	0	0	0	0
ENSG00000227104	0	0	0	0	0	0
ENSG00000233079	0	0	0	0	0	0
ENSG00000235612	0	0	0	0	0	0
ENSG00000229871	0	0	0	0	0	0
ENSG00000260971	0	0	0	0	0	0
ENSG00000223956	1	0	0	0	0	0
ENSG00000162407	36	35	44	23	32	33
ENSG00000236776	0	0	0	0	0	0
ENSG00000224980	0	0	0	0	0	0
ENSG00000225475	0	0	0	0	0	2
ENSG00000162409	4	7	7	8	13	11
ENSG00000187889	0	1	0	1	0	0
ENSG00000229913	0	0	0	0	0	0
ENSG00000157131	0	0	0	0	0	0
ENSG00000021852	0	0	0	0	0	0
ENSG00000236341	0	0	0	0	0	0
ENSG00000173406	0	0	1	0	0	2
ENSG00000227935	0	0	0	0	0	0
ENSG00000236888	0	0	0	0	0	0
ENSG00000226759	0	0	1	0	0	0
ENSG00000229887	2	1	1	1	3	0
ENSG00000223416	0	0	1	0	2	0
ENSG00000235038	0	0	0	0	0	0
ENSG00000230546	0	0	0	0	0	0
ENSG00000233216	1	0	0	0	0	0
ENSG00000162600	624	776	652	754	689	779
ENSG00000270209	0	0	0	0	0	0
ENSG00000264128	0	0	0	0	0	1
ENSG00000184292	14985	16476	15039	12668	11824	14979
ENSG00000185839	6	9	10	6	7	8
ENSG00000162601	2319	2522	2146	2401	2311	2576
ENSG00000283445	64	89	67	39	49	46
ENSG00000177606	3410	3577	3562	2881	2625	3215
ENSG00000234807	6	22	9	12	11	14
ENSG00000272226	4	6	3	1	3	3
ENSG00000231740	3	0	0	0	0	1
ENSG00000232453	9	14	15	15	11	7
ENSG00000237352	23	32	35	18	25	12
ENSG00000228121	1	1	1	0	2	0
ENSG00000241042	0	2	0	0	1	0
ENSG00000235215	3	0	2	0	4	0
ENSG00000224609	1	0	1	0	0	7
ENSG00000270457	0	1	0	2	0	0
ENSG00000172456	205	228	163	184	177	224
ENSG00000266150	0	0	0	0	0	0
ENSG00000226883	1	3	2	0	0	1
ENSG00000134709	1811	1970	1620	1845	1847	2096
ENSG00000134716	793	820	774	633	583	667
ENSG00000265535	0	0	0	0	0	0
ENSG00000162598	0	0	0	0	0	0
ENSG00000229332	0	0	0	0	0	0
ENSG00000238242	0	0	0	0	0	0
ENSG00000226476	1	0	2	0	3	0
ENSG00000231252	0	0	0	0	0	0
ENSG00000162599	1320	1482	1336	1577	1414	1654
ENSG00000237928	0	0	0	0	0	0
ENSG00000270742	1	1	1	1	3	4
ENSG00000237853	1	3	0	3	0	1
ENSG00000223920	0	0	0	0	0	2
ENSG00000162604	750	844	749	777	751	876
ENSG00000271200	8	0	8	2	2	6
ENSG00000132849	3593	3782	3367	3450	3336	3788
ENSG00000200575	0	0	2	0	0	0
ENSG00000212360	2	2	1	0	0	0
ENSG00000236646	0	0	0	0	0	0
ENSG00000242860	1	0	0	1	0	0
ENSG00000263908	0	0	0	0	1	0
ENSG00000283690	0	0	0	0	0	0
ENSG00000234204	0	0	0	0	0	0
ENSG00000234088	0	0	0	0	0	0
ENSG00000240563	492	529	550	526	494	603
ENSG00000237227	2	3	2	3	1	1
ENSG00000200174	0	0	0	0	0	0
ENSG00000132854	163	125	128	97	104	120
ENSG00000201153	0	0	1	0	0	0
ENSG00000162607	4588	5022	4663	4873	4456	5198
ENSG00000116641	1862	1952	1605	1806	1713	2144
ENSG00000270549	0	1	0	3	0	0
ENSG00000132855	4	6	3	4	10	3
ENSG00000278967	5	0	3	1	0	1
ENSG00000213703	2	0	2	2	2	3
ENSG00000235545	6	4	6	7	6	6
ENSG00000125703	572	618	579	654	564	722
ENSG00000234318	0	0	0	0	2	0
ENSG00000237163	0	0	0	0	0	0
ENSG00000229537	0	0	0	0	0	0
ENSG00000227485	0	0	0	0	0	0
ENSG00000229225	0	0	0	0	0	0
ENSG00000203605	0	0	0	0	0	0
ENSG00000224209	0	2	0	0	0	0
ENSG00000252259	0	0	0	0	0	0
ENSG00000228734	0	0	1	0	0	0
ENSG00000223683	0	0	0	0	0	0
ENSG00000230798	0	2	2	1	0	1
ENSG00000187140	0	0	0	0	0	0
ENSG00000275836	0	0	0	0	0	0
ENSG00000252784	0	0	0	0	0	0
ENSG00000236674	0	0	0	0	0	0
ENSG00000088035	821	993	822	869	898	990
ENSG00000142856	1746	1950	1774	1820	1805	2036
ENSG00000203965	420	463	413	429	479	536
ENSG00000264271	0	0	0	0	0	0
ENSG00000251720	1	7	2	11	2	3
ENSG00000116652	35	39	24	47	40	51
ENSG00000276884	0	0	0	0	0	0
ENSG00000278287	0	0	0	0	0	0
ENSG00000277565	0	0	0	0	0	0
ENSG00000275823	0	0	0	0	0	0
ENSG00000277689	0	0	0	0	0	0
ENSG00000274199	0	0	0	0	0	0
ENSG00000079739	3064	3237	2949	3015	2651	3336
ENSG00000244256	8	10	8	1	8	2
ENSG00000185483	109	147	118	137	141	147
ENSG00000177452	0	0	0	0	0	0
ENSG00000228056	0	0	0	0	0	0
ENSG00000207190	0	0	0	0	0	0
ENSG00000200508	0	0	0	0	0	0
ENSG00000223949	0	6	0	3	3	4
ENSG00000177414	2	0	0	0	0	0
ENSG00000238653	0	0	0	0	0	0
ENSG00000158966	261	283	257	252	226	321
ENSG00000264470	0	0	0	0	0	0
ENSG00000162437	908	947	892	966	960	1104
ENSG00000162434	5329	5650	5187	4317	4207	5043
ENSG00000234784	0	0	0	0	0	0
ENSG00000233877	5	1	0	0	0	0
ENSG00000226891	5	1	3	6	5	4
ENSG00000185031	0	1	0	1	1	0
ENSG00000272506	1	1	1	0	0	0
ENSG00000212257	0	0	0	0	0	0
ENSG00000265996	1	1	2	1	1	4
ENSG00000199135	0	0	0	0	0	0
ENSG00000231485	1	0	0	0	3	1
ENSG00000235804	0	0	0	0	0	0
ENSG00000234496	0	0	0	0	0	0
ENSG00000162433	3365	3628	3198	3466	3279	3820
ENSG00000231622	0	0	1	1	2	1
ENSG00000116675	68	63	70	56	64	71
ENSG00000229294	0	0	0	0	0	1
ENSG00000234144	0	0	0	0	0	0
ENSG00000222624	0	0	0	0	0	0
ENSG00000213625	1621	1731	1593	1539	1391	1720
ENSG00000116678	161	134	124	122	155	149
ENSG00000237852	2	1	2	3	2	3
ENSG00000224570	1	0	0	0	0	0
ENSG00000239319	0	0	0	0	0	0
ENSG00000184588	1	0	0	0	0	0
ENSG00000227466	0	0	0	0	0	0
ENSG00000223152	0	0	0	0	0	0
ENSG00000118473	4	3	0	2	2	3
ENSG00000264720	0	0	0	0	0	0
ENSG00000248458	0	0	0	0	0	0
ENSG00000152760	0	0	0	0	1	0
ENSG00000172410	0	0	0	0	0	0
ENSG00000152763	121	165	125	123	108	186
ENSG00000231080	0	0	0	0	0	0
ENSG00000198160	2851	3113	2675	2753	2494	3264
ENSG00000116704	1110	1176	1060	1206	1163	1323
ENSG00000203963	2	2	4	1	6	2
ENSG00000252433	0	0	0	0	0	0
ENSG00000275678	0	0	1	0	2	1
ENSG00000162594	6	7	2	1	6	5
ENSG00000253074	0	0	0	0	0	0
ENSG00000252116	0	0	0	0	0	0
ENSG00000228523	0	0	0	0	0	0
ENSG00000081985	793	919	800	874	831	1009
ENSG00000142864	20012	21847	20297	22490	21261	24933
ENSG00000223263	3	7	9	11	6	10
ENSG00000235200	2	1	1	0	0	0
ENSG00000207504	0	0	0	0	0	0
ENSG00000238139	0	0	0	0	0	0
ENSG00000242482	0	0	0	0	0	0
ENSG00000232048	0	0	0	0	0	1
ENSG00000116717	3968	4284	4162	4054	3641	4255
ENSG00000172380	5136	5687	5094	4901	4832	5364
ENSG00000238778	0	0	0	0	0	0
ENSG00000232284	31	38	19	44	26	53
ENSG00000235055	0	0	0	0	0	0
ENSG00000162595	12	10	11	10	12	12
ENSG00000228431	0	0	0	0	0	3
ENSG00000116729	4149	4541	4211	4368	4073	5018
ENSG00000234383	24	18	7	15	18	14
ENSG00000221203	1	1	0	1	2	0
ENSG00000229133	0	0	0	0	0	1
ENSG00000225242	0	0	0	0	0	0
ENSG00000237622	1	2	1	6	0	0
ENSG00000229440	1	0	0	0	0	0
ENSG00000116745	1	0	1	1	2	1
ENSG00000024526	3536	4053	3345	3994	3721	4627
ENSG00000233589	62	56	33	43	44	68
ENSG00000234264	19	19	18	13	20	22
ENSG00000225167	0	0	0	0	0	0
ENSG00000223883	3	0	1	2	1	1
ENSG00000235446	0	0	0	0	0	0
ENSG00000229639	0	0	0	0	0	0
ENSG00000033122	40	67	51	54	68	84
ENSG00000270615	0	0	0	0	0	0
ENSG00000240692	0	0	0	0	0	0
ENSG00000229359	0	0	0	0	0	0
ENSG00000237919	0	0	0	0	1	3
ENSG00000066557	1318	1423	1226	1438	1343	1497
ENSG00000244389	0	0	1	0	0	1
ENSG00000116754	8517	9518	8293	8958	8384	9996
ENSG00000228988	1	4	0	1	0	2
ENSG00000118454	1107	1285	1061	1181	1127	1330
ENSG00000197568	364	362	312	361	350	407
ENSG00000226088	6	4	6	8	6	8
ENSG00000279230	4	4	7	0	3	4
ENSG00000116761	89	110	97	84	60	92
ENSG00000278636	0	0	0	0	0	0
ENSG00000271992	3	3	1	0	0	2
ENSG00000233020	0	1	0	0	0	0
ENSG00000237033	0	0	0	0	0	0
ENSG00000229051	0	0	0	0	0	0
ENSG00000226208	0	0	0	0	0	0
ENSG00000050628	3	1	1	4	2	0
ENSG00000235782	0	0	0	0	0	0
ENSG00000269933	0	0	0	0	0	0
ENSG00000235079	6	9	13	2	11	7
ENSG00000132485	5213	5773	5268	5415	4967	5982
ENSG00000207721	25	58	39	27	34	33
ENSG00000229956	11	4	5	10	13	10
ENSG00000226324	0	0	0	0	0	0
ENSG00000172260	16	25	12	13	23	24
ENSG00000231985	0	0	0	0	0	0
ENSG00000271618	0	0	0	0	0	0
ENSG00000228853	0	0	0	0	0	0
ENSG00000233994	2	3	1	2	2	3
ENSG00000227207	0	0	0	0	0	0
ENSG00000212366	0	0	0	0	0	0
ENSG00000225087	0	0	0	0	0	0
ENSG00000227016	0	0	0	0	0	0
ENSG00000280317	0	0	0	0	0	0
ENSG00000229636	0	0	0	0	0	0
ENSG00000251825	0	0	0	0	0	0
ENSG00000233973	0	0	0	0	0	0
ENSG00000223479	0	0	1	0	0	0
ENSG00000200601	0	0	0	0	0	0
ENSG00000252005	0	0	0	0	0	0
ENSG00000162620	98	141	101	141	121	125
ENSG00000254685	520	579	535	598	540	669
ENSG00000259030	9	21	12	14	17	17
ENSG00000116783	0	0	0	0	1	1
ENSG00000237324	0	1	0	0	0	1
ENSG00000233894	0	0	1	0	0	0
ENSG00000162621	0	0	0	0	0	0
ENSG00000178965	2	3	4	1	1	2
ENSG00000234497	0	0	0	0	0	0
ENSG00000272864	4	2	2	3	9	7
ENSG00000116791	1483	1728	1462	1545	1445	1732
ENSG00000162623	1637	1763	1606	1709	1621	1857
ENSG00000229943	0	0	0	0	0	0
ENSG00000261213	0	0	0	0	0	0
ENSG00000224127	0	0	0	0	0	0
ENSG00000162624	0	0	0	0	0	0
ENSG00000224149	0	0	0	0	0	0
ENSG00000206999	0	0	0	0	0	0
ENSG00000137968	3	0	0	0	0	0
ENSG00000224493	0	0	0	0	0	0
ENSG00000252338	0	0	0	0	0	0
ENSG00000213579	0	0	0	0	0	0
ENSG00000230863	0	0	0	0	0	0
ENSG00000178193	0	0	0	2	0	0
ENSG00000117054	1296	1409	1264	1293	1231	1434
ENSG00000181227	19	17	21	17	20	17
ENSG00000137955	2888	3106	2813	3186	2863	3505
ENSG00000206620	0	0	0	0	0	0
ENSG00000207241	0	0	0	0	0	0
ENSG00000201487	0	0	0	0	0	0
ENSG00000057468	11	12	5	12	9	6
ENSG00000154007	0	0	0	0	0	0
ENSG00000225605	0	1	0	0	0	0
ENSG00000230027	0	0	0	0	0	0
ENSG00000184005	0	0	1	0	0	3
ENSG00000223905	0	0	0	0	0	0
ENSG00000272855	0	0	0	0	0	0
ENSG00000226415	57	79	74	72	55	67
ENSG00000199921	0	0	0	0	0	0
ENSG00000237552	0	0	0	0	0	0
ENSG00000117069	5	1	2	1	2	1
ENSG00000276081	0	0	0	0	0	0
ENSG00000230498	0	0	0	0	0	0
ENSG00000142892	1453	1513	1417	1512	1412	1708
ENSG00000226084	66	87	57	69	64	56
ENSG00000228187	0	0	0	0	0	0
ENSG00000154027	23	13	7	12	18	22
ENSG00000233099	0	0	0	0	0	0
ENSG00000251767	0	0	0	0	0	0
ENSG00000036549	2056	2201	1989	2070	2081	2461
ENSG00000251785	1	0	0	0	0	0
ENSG00000243437	1	0	1	0	1	0
ENSG00000077254	2630	2899	2552	2605	2592	3058
ENSG00000232672	0	0	0	0	0	0
ENSG00000180488	1146	1264	1179	1194	1139	1293
ENSG00000222849	5	9	7	8	3	4
ENSG00000219201	34	26	25	23	31	27
ENSG00000235613	3	2	0	2	1	5
ENSG00000232015	0	0	0	0	0	0
ENSG00000235927	4	3	4	9	11	7
ENSG00000162614	25	64	49	79	61	64
ENSG00000162613	6907	7391	7061	7317	6906	7698
ENSG00000162616	1806	1962	1798	2058	2002	2245
ENSG00000137960	314	360	279	331	338	438
ENSG00000273338	20	22	26	15	24	30
ENSG00000213561	3	1	1	5	2	8
ENSG00000251958	0	0	0	0	0	0
ENSG00000213560	0	1	0	0	0	0
ENSG00000202263	0	4	1	5	4	6
ENSG00000233333	0	0	0	0	0	0
ENSG00000237413	0	2	1	4	1	1
ENSG00000122420	8	8	7	1	8	11
ENSG00000227556	0	0	0	0	0	0
ENSG00000212308	0	0	0	0	0	0
ENSG00000137959	37157	40669	35889	33929	32936	37957
ENSG00000137965	24969	27395	24750	22456	21917	26167
ENSG00000238015	27	36	45	32	18	39
ENSG00000235400	0	0	0	0	1	0
ENSG00000162618	1	0	2	0	0	1
ENSG00000230787	0	1	1	1	0	0
ENSG00000235011	0	0	0	0	0	0
ENSG00000282898	0	0	0	0	0	0
ENSG00000232676	0	0	0	1	0	0
ENSG00000235756	0	0	0	0	0	0
ENSG00000260322	0	0	0	0	0	0
ENSG00000277670	0	0	0	0	0	0
ENSG00000236407	0	0	0	0	0	0
ENSG00000225598	0	0	0	0	0	0
ENSG00000213559	0	0	0	0	0	0
ENSG00000227062	0	0	0	0	0	0
ENSG00000234108	0	0	0	0	0	0
ENSG00000224326	0	0	0	0	0	0
ENSG00000234184	0	0	0	0	0	0
ENSG00000227937	0	0	0	0	0	0
ENSG00000229752	0	0	0	1	0	0
ENSG00000235089	0	0	0	0	0	0
ENSG00000223026	0	0	0	0	0	0
ENSG00000117114	1366	1290	1255	1282	1301	1545
ENSG00000224494	0	0	0	0	0	0
ENSG00000227288	0	1	0	3	0	3
ENSG00000227960	0	0	0	0	0	0
ENSG00000234953	0	0	0	0	0	0
[truncated: 56,144 more rows]

## Sheet: Supplementary Data 5
Gene	End-Sup-ctrl-MM-3	End-Sup-ctrl-MM-2	End-Sup-ctrl-MM-1	End-Sup-MM-3	End-Sup-MM-2	End-Sup-MM-1
ENSG00000223972	1	0	1	2	0	0
ENSG00000227232	100	81	109	98	108	104
ENSG00000278267	9	6	10	6	11	13
ENSG00000243485	0	1	0	1	0	0
ENSG00000237613	0	0	0	0	0	0
ENSG00000268020	0	0	0	0	0	0
ENSG00000240361	0	2	0	0	0	0
ENSG00000186092	0	0	0	0	0	1
ENSG00000238009	19	9	12	16	13	17
ENSG00000239945	0	0	0	0	0	0
ENSG00000233750	1	0	1	0	0	0
ENSG00000268903	0	0	0	0	0	0
ENSG00000269981	0	0	0	0	0	0
ENSG00000239906	0	0	0	0	0	0
ENSG00000241860	8	8	10	10	9	7
ENSG00000222623	0	0	0	0	0	0
ENSG00000241599	0	0	0	0	0	0
ENSG00000279928	1	0	3	0	1	5
ENSG00000279457	214	229	265	211	271	233
ENSG00000273874	2	2	2	0	0	1
ENSG00000228463	14	13	29	10	19	22
ENSG00000241670	0	0	0	0	0	0
ENSG00000236679	0	0	0	0	0	0
ENSG00000236743	2	0	0	0	0	0
ENSG00000236601	0	0	0	0	0	0
ENSG00000237094	6	9	19	15	11	11
ENSG00000269732	0	0	0	0	0	0
ENSG00000278566	0	0	0	0	0	0
ENSG00000224813	0	0	0	0	0	0
ENSG00000233653	1	0	0	0	0	0
ENSG00000250575	1	2	0	0	0	0
ENSG00000278757	0	0	0	0	0	0
ENSG00000230021	4	0	4	2	3	7
ENSG00000235146	0	0	0	2	0	0
ENSG00000225972	8	5	2	4	3	3
ENSG00000225630	255	225	218	250	241	232
ENSG00000237973	562	505	486	453	462	545
ENSG00000278791	0	0	0	0	0	0
ENSG00000229344	14	11	12	5	16	5
ENSG00000240409	3	7	7	5	8	7
ENSG00000248527	7230	7296	8305	7814	6739	6448
ENSG00000198744	9	9	11	6	12	10
ENSG00000268663	0	0	0	0	0	0
ENSG00000273547	0	0	0	0	0	0
ENSG00000283574	0	4	0	0	0	0
ENSG00000229376	3	4	3	5	5	3
ENSG00000228327	226	350	323	289	346	307
ENSG00000223181	0	2	0	0	0	0
ENSG00000229905	0	1	1	0	0	0
ENSG00000237491	66	42	37	40	58	48
ENSG00000230092	11	9	23	22	18	19
ENSG00000177757	14	10	10	7	11	9
ENSG00000228794	347	345	356	365	403	369
ENSG00000225880	25	29	20	20	28	20
ENSG00000230368	0	0	0	1	0	1
ENSG00000234711	1	1	0	0	0	0
ENSG00000283040	0	0	0	0	0	0
ENSG00000272438	11	13	10	8	13	16
ENSG00000230699	32	33	42	19	37	34
ENSG00000241180	2	0	3	1	1	1
ENSG00000223764	8	5	6	3	6	4
ENSG00000187634	15	18	13	15	16	11
ENSG00000188976	6360	6025	6913	5473	5425	5223
ENSG00000187961	669	585	719	581	576	619
ENSG00000187583	637	633	729	692	635	703
ENSG00000187642	373	340	348	417	412	471
ENSG00000272512	131	148	174	151	172	156
ENSG00000188290	2628	2433	2458	2591	2038	1550
ENSG00000187608	38546	33731	36742	48993	43280	42150
ENSG00000231702	7	6	3	5	11	9
ENSG00000224969	22	29	27	31	36	44
ENSG00000188157	29334	29488	33064	34461	35142	30780
ENSG00000242590	0	0	0	0	0	0
ENSG00000217801	322	310	310	407	392	390
ENSG00000273443	93	102	96	138	137	152
ENSG00000237330	169	131	167	200	173	167
ENSG00000131591	449	483	507	423	491	416
ENSG00000223823	0	0	0	0	0	0
ENSG00000207730	7	7	12	7	8	8
ENSG00000207607	3	15	5	17	17	6
ENSG00000198976	9	7	10	9	13	10
ENSG00000272141	50	65	56	74	81	77
ENSG00000205231	5	1	2	4	3	5
ENSG00000162571	4	3	3	3	6	8
ENSG00000186891	7	5	9	1	4	2
ENSG00000186827	1	1	0	0	3	2
ENSG00000078808	4574	4282	4775	4596	4425	4158
ENSG00000176022	718	748	786	772	638	558
ENSG00000184163	83	72	69	58	68	67
ENSG00000260179	17	8	10	14	14	11
ENSG00000160087	1719	1571	1811	1629	1668	1581
ENSG00000230415	18	20	20	22	11	17
ENSG00000162572	38	30	30	52	52	48
ENSG00000131584	1458	1341	1497	1369	1451	1259
ENSG00000278073	0	0	0	0	1	0
ENSG00000169972	553	555	512	489	432	429
ENSG00000127054	3220	3357	3622	3247	3186	3094
ENSG00000240731	135	155	163	143	146	160
ENSG00000224051	1207	1100	1186	1213	1191	1037
ENSG00000169962	10	24	28	24	12	14
ENSG00000107404	4514	4531	4846	4242	3848	3525
ENSG00000162576	759	745	775	718	734	745
ENSG00000175756	4703	4086	4350	4168	3730	3686
ENSG00000223663	3	1	1	3	0	5
ENSG00000221978	4457	4271	4595	4765	4828	4935
ENSG00000224870	736	745	799	734	708	689
ENSG00000242485	2433	2300	2434	2157	1932	2007
ENSG00000264293	0	0	0	0	0	0
ENSG00000272455	45	57	64	86	68	65
ENSG00000235098	48	39	28	45	33	28
ENSG00000225905	3	1	1	1	1	1
ENSG00000205116	1	0	0	0	0	0
ENSG00000225285	0	0	0	0	0	0
ENSG00000179403	86	76	109	92	94	72
ENSG00000215915	2	4	3	1	1	1
ENSG00000160072	2551	2343	2688	2164	2254	2201
ENSG00000197785	2516	2365	2689	2181	2065	1944
ENSG00000205090	28	35	34	22	30	28
ENSG00000160075	4190	3913	4512	3962	3590	3448
ENSG00000215014	14	25	16	24	16	26
ENSG00000279244	0	0	0	0	0	0
ENSG00000274481	0	0	0	0	0	0
ENSG00000228594	535	507	588	497	453	322
ENSG00000272106	66	55	73	61	72	70
ENSG00000197530	1140	1058	1235	1198	1124	1064
ENSG00000189409	4	0	2	3	4	2
ENSG00000248333	2082	1879	2085	2085	1958	2005
ENSG00000272004	6	9	11	8	2	7
ENSG00000189339	1099	1211	1249	1292	1321	1283
ENSG00000269737	38	49	53	39	64	51
ENSG00000215914	0	0	1	0	0	0
ENSG00000008128	617	600	665	670	619	709
ENSG00000268575	62	77	78	93	114	113
ENSG00000227775	88	75	113	122	125	128
ENSG00000215790	110	111	108	141	143	156
ENSG00000008130	3011	2954	3234	3133	3138	3022
ENSG00000078369	14675	14575	15946	15641	14964	13869
ENSG00000231050	16	11	18	7	12	21
ENSG00000169885	18	13	10	13	15	6
ENSG00000178821	59	35	41	47	45	43
ENSG00000142609	15	23	10	8	11	17
ENSG00000233542	0	0	0	0	0	0
ENSG00000187730	6	1	0	0	1	0
ENSG00000226969	2	1	1	0	0	1
ENSG00000067606	796	826	875	815	798	819
ENSG00000271806	11	1	10	12	3	7
ENSG00000182873	54	91	97	82	85	95
ENSG00000162585	1002	937	1093	995	987	823
ENSG00000234396	0	1	3	2	3	2
ENSG00000157933	1791	1922	2105	2076	2090	1900
ENSG00000116151	365	356	394	343	362	376
ENSG00000272161	0	0	3	3	1	0
ENSG00000269896	87	78	92	62	73	67
ENSG00000272420	16	17	12	6	11	9
ENSG00000157916	3846	3504	3934	3889	3822	3533
ENSG00000157911	616	561	651	507	479	440
ENSG00000149527	3059	3192	3437	3032	3172	2930
ENSG00000224387	43	36	43	34	29	50
ENSG00000229393	33	42	44	50	50	51
ENSG00000157881	1040	1055	1118	1074	954	929
ENSG00000197921	20	26	36	15	18	13
ENSG00000272449	27	23	26	37	17	24
ENSG00000238164	26	14	19	17	26	16
ENSG00000157873	330	297	335	428	427	463
ENSG00000225931	1	2	1	0	2	0
ENSG00000228037	1	0	0	1	0	0
ENSG00000157870	744	820	930	783	732	706
ENSG00000142606	4	6	5	1	1	4
ENSG00000237058	0	0	0	0	0	0
ENSG00000215912	5	17	10	15	22	6
ENSG00000283259	0	0	0	0	0	0
ENSG00000233234	0	0	0	0	0	0
ENSG00000231630	0	3	3	2	1	0
ENSG00000169717	0	0	0	0	0	0
ENSG00000177133	0	2	1	0	1	0
ENSG00000142611	17	28	32	41	37	40
ENSG00000283572	0	0	0	0	0	0
ENSG00000226286	0	0	0	0	0	0
ENSG00000279839	0	0	0	0	0	0
ENSG00000272235	0	0	0	0	0	1
ENSG00000130762	1495	1466	1610	1571	1440	1390
ENSG00000272088	1	4	0	2	2	1
ENSG00000162591	180	188	209	165	166	165
ENSG00000207776	0	0	0	0	0	0
ENSG00000238260	11	6	8	7	8	4
ENSG00000158109	1170	1165	1216	1218	1158	1045
ENSG00000116213	844	752	906	843	853	824
ENSG00000078900	191	179	223	276	296	237
ENSG00000227589	0	2	1	3	5	3
ENSG00000235131	0	3	2	2	3	1
ENSG00000227372	1622	1607	1747	1710	1702	1842
ENSG00000276189	0	0	0	0	0	0
ENSG00000162592	2	0	1	2	0	0
ENSG00000235169	20	27	19	24	16	12
ENSG00000130764	2313	2224	2523	2187	2083	2060
ENSG00000266075	6	6	1	2	8	3
ENSG00000272153	51	41	53	39	43	50
ENSG00000116198	1586	1615	1736	1572	1588	1526
ENSG00000169598	281	264	286	260	273	253
ENSG00000198912	1229	1228	1330	1290	1271	1172
ENSG00000236423	39	54	57	61	52	62
ENSG00000233304	0	0	0	0	0	0
ENSG00000226374	0	1	0	0	0	0
ENSG00000229280	0	0	0	0	0	0
ENSG00000235054	0	0	0	0	0	0
ENSG00000227169	0	0	0	0	0	0
ENSG00000232596	0	0	0	0	0	0
ENSG00000196581	24	12	10	11	11	17
ENSG00000231510	0	0	0	0	0	0
ENSG00000260972	0	0	0	0	0	0
ENSG00000283356	0	0	0	0	0	0
ENSG00000236948	1	0	0	0	0	0
ENSG00000264341	0	0	0	0	0	0
ENSG00000264101	1	0	0	0	3	0
ENSG00000131697	681	713	839	761	752	720
ENSG00000069424	152	189	177	204	182	168
ENSG00000116254	81	77	96	58	57	54
ENSG00000116251	17328	16937	17227	15741	14269	15026
ENSG00000226944	3	6	1	8	4	4
ENSG00000158286	703	770	790	867	872	922
ENSG00000116237	4578	4656	4933	4740	4797	4403
ENSG00000225077	50	39	48	37	50	50
ENSG00000173673	1	0	0	0	0	0
ENSG00000158292	1223	1190	1344	1132	1077	1036
ENSG00000097021	4413	4000	4397	3874	3727	3383
ENSG00000271746	0	0	0	0	0	0
ENSG00000069812	2106	2116	2384	2006	1891	1843
ENSG00000187017	85	88	99	82	82	77
ENSG00000265392	1	0	0	0	0	0
ENSG00000231868	6	2	1	1	2	0
ENSG00000215788	1783	1914	1898	1898	1862	2070
ENSG00000171680	3531	3651	4065	3767	3950	3952
ENSG00000162408	1243	1387	1612	1362	1471	1429
ENSG00000253022	3	1	0	0	3	0
ENSG00000229519	6	10	23	11	17	14
ENSG00000173662	0	1	1	0	2	0
ENSG00000204859	879	918	1040	879	914	842
ENSG00000162413	1121	1207	1289	1440	1422	1235
ENSG00000116273	1410	1498	1472	1511	1503	1451
ENSG00000041988	453	421	403	419	424	388
ENSG00000007923	3288	3492	3588	3204	3200	3151
ENSG00000228750	0	0	0	0	0	0
ENSG00000237436	3	8	10	8	10	4
ENSG00000171735	1636	1570	1419	1485	1455	1481
ENSG00000227950	0	0	1	1	1	0
ENSG00000237365	0	0	0	0	0	0
ENSG00000207056	1	0	0	0	0	0
ENSG00000237402	0	1	0	0	1	0
ENSG00000237728	0	0	0	0	0	0
ENSG00000225126	0	0	0	0	0	0
ENSG00000270171	1	0	0	0	0	0
ENSG00000270035	0	0	0	0	0	0
ENSG00000269978	0	0	1	1	1	0
ENSG00000049245	3840	3765	4157	4079	4261	4083
ENSG00000269925	21	23	34	35	36	35
ENSG00000049246	693	768	836	601	617	579
ENSG00000236266	12	24	11	11	10	7
ENSG00000049247	0	3	0	0	2	0
ENSG00000049249	8	8	5	32	37	22
ENSG00000270330	0	0	0	0	0	0
ENSG00000116288	8915	8243	8715	7753	7323	7590
ENSG00000200344	5	8	5	3	3	6
ENSG00000116285	7927	8108	8466	10126	10233	10224
ENSG00000238290	18	27	20	32	15	26
ENSG00000232848	0	0	1	1	1	1
ENSG00000229305	0	0	0	0	1	3
ENSG00000227634	1	2	1	2	4	1
ENSG00000200975	0	0	0	0	0	0
ENSG00000233645	0	0	0	0	0	0
ENSG00000251977	0	0	0	0	0	0
ENSG00000162426	15	18	22	15	18	5
ENSG00000252254	0	0	2	0	1	0
ENSG00000142599	1965	2116	2242	2199	2330	2091
ENSG00000232912	3	4	4	2	4	3
ENSG00000221083	0	1	1	1	0	0
ENSG00000270282	1	0	0	0	0	0
ENSG00000234619	0	0	0	0	3	0
ENSG00000224315	0	0	6	5	4	0
ENSG00000222511	0	1	1	0	5	4
ENSG00000226545	1	2	3	2	1	0
ENSG00000228423	1	2	3	1	2	2
ENSG00000229716	0	0	0	0	0	0
ENSG00000074800	66914	63518	69278	67336	64879	61869
ENSG00000274258	0	0	3	1	4	2
ENSG00000236269	26	45	40	34	37	49
ENSG00000230679	5	11	4	4	3	2
ENSG00000201725	0	0	0	0	0	2
ENSG00000238249	3	1	0	4	4	2
ENSG00000232208	0	0	0	0	0	0
ENSG00000232663	0	0	0	0	0	0
ENSG00000131686	0	6	2	2	2	1
ENSG00000265141	0	0	0	0	0	0
ENSG00000197241	1	0	1	0	1	0
ENSG00000142583	2	3	1	0	0	2
ENSG00000252404	0	0	0	0	0	0
ENSG00000180758	471	470	533	588	534	566
ENSG00000228526	391	406	440	527	559	579
ENSG00000234546	121	101	106	129	141	114
ENSG00000281937	2	5	5	3	1	2
ENSG00000049239	919	983	1078	898	996	931
ENSG00000171621	531	534	579	727	681	631
ENSG00000252956	0	0	0	0	0	0
ENSG00000235263	0	0	0	0	0	0
ENSG00000171612	527	457	595	428	417	397
ENSG00000231181	6	9	5	7	17	19
ENSG00000188807	936	934	1037	952	963	853
ENSG00000171608	500	557	617	754	829	766
ENSG00000179840	1	0	1	0	0	0
ENSG00000233268	0	0	0	0	0	0
ENSG00000231789	11	13	9	8	11	8
ENSG00000171603	12328	12738	13802	13769	13570	12906
ENSG00000271264	0	0	0	0	0	1
ENSG00000280113	3	0	2	2	7	4
ENSG00000178585	2203	2276	2345	2018	1870	1820
ENSG00000223989	0	0	0	0	0	0
ENSG00000162441	1561	1637	1690	1507	1682	1552
ENSG00000228150	36	49	43	42	41	56
ENSG00000173614	645	624	673	676	655	599
ENSG00000202415	8	4	2	1	3	6
ENSG00000283611	1	3	6	5	6	3
ENSG00000265521	2	1	2	4	1	6
ENSG00000241326	0	0	0	0	0	0
ENSG00000162444	91	97	85	97	69	62
ENSG00000130939	2270	2203	2426	2322	2392	2165
ENSG00000224340	0	1	0	0	1	0
ENSG00000233623	0	5	6	2	7	9
ENSG00000201746	0	0	0	2	1	4
ENSG00000054523	3749	4315	4707	4064	4554	4486
ENSG00000264881	0	0	0	0	0	1
ENSG00000199562	0	0	2	4	2	3
ENSG00000264501	0	0	0	0	0	0
ENSG00000142657	8109	7752	8468	8320	7978	7453
ENSG00000271989	0	1	3	9	2	2
ENSG00000251503	49	48	50	46	37	30
ENSG00000175279	413	366	415	422	342	366
ENSG00000241563	9	14	6	13	9	13
ENSG00000160049	4749	4986	5470	4332	4282	4215
ENSG00000203469	0	0	0	0	0	0
ENSG00000142655	1228	1119	1184	1131	1115	1015
ENSG00000243267	1	3	3	0	1	4
ENSG00000130940	309	345	384	405	448	352
ENSG00000272078	18	28	35	33	29	30
ENSG00000225158	0	0	1	0	0	0
ENSG00000175262	0	0	0	1	1	0
ENSG00000215785	0	0	1	1	1	2
ENSG00000120948	5891	5580	6314	5888	6367	6236
ENSG00000277726	1	1	1	3	1	1
ENSG00000009724	36	51	74	47	67	60
ENSG00000271895	42	36	48	55	41	49
ENSG00000116649	2200	1962	2352	1822	1631	1459
ENSG00000171824	4018	3913	4230	4138	4000	4036
ENSG00000226849	23	20	19	28	33	22
ENSG00000230337	16	12	25	21	16	10
ENSG00000198793	4717	4961	5654	4760	5197	4802
ENSG00000225602	0	0	0	4	3	2
ENSG00000253086	0	1	0	0	1	2
ENSG00000171819	0	2	4	1	4	6
ENSG00000207451	0	0	0	0	1	1
ENSG00000238173	0	0	0	1	1	1
ENSG00000120942	682	655	668	548	627	593
ENSG00000238199	1	5	2	2	0	4
ENSG00000224338	1	0	0	0	0	0
ENSG00000204624	21	32	49	49	81	52
ENSG00000235643	23	12	19	29	43	19
ENSG00000116661	295	272	282	324	296	290
ENSG00000132879	546	502	589	579	535	533
ENSG00000116663	596	548	510	818	752	732
ENSG00000116670	1372	1255	1333	1331	1216	1079
ENSG00000162490	3	7	7	10	7	5
ENSG00000177674	1968	1740	1967	2315	2444	2179
ENSG00000215910	0	1	1	0	0	0
ENSG00000177553	0	0	0	0	0	0
ENSG00000177000	473	506	559	610	652	613
ENSG00000011021	875	851	987	908	1031	971
ENSG00000242349	52	47	44	67	40	40
ENSG00000276470	0	0	0	0	0	0
ENSG00000278852	0	0	0	0	0	0
ENSG00000175206	10	8	12	9	13	9
ENSG00000275915	0	0	0	0	0	0
ENSG00000120937	0	1	0	0	1	0
ENSG00000224904	0	0	0	0	0	0
ENSG00000199347	2	3	2	0	1	1
ENSG00000201801	1	0	0	1	1	0
ENSG00000116685	2685	2563	2736	2756	2471	2182
ENSG00000083444	4002	3781	4167	4299	4114	3862
ENSG00000116688	9845	10032	10595	9906	9921	9621
ENSG00000270914	0	0	0	0	0	0
ENSG00000116691	1021	955	1107	975	853	884
ENSG00000202461	8	7	4	3	8	11
ENSG00000276869	1	1	1	0	0	0
ENSG00000243539	0	0	0	0	0	0
ENSG00000120949	735	651	862	557	542	467
ENSG00000201135	0	0	0	0	0	0
ENSG00000227875	0	0	0	0	0	0
ENSG00000028137	71	101	112	200	193	176
ENSG00000263676	0	0	0	0	0	0
ENSG00000225196	0	0	1	0	0	0
ENSG00000252969	0	0	0	0	0	0
ENSG00000048707	2874	3270	3545	2886	3311	3137
ENSG00000239149	2	5	4	9	2	9
ENSG00000229484	0	0	0	0	0	0
ENSG00000162496	1136	1095	1178	993	946	997
ENSG00000221340	3	1	6	5	2	7
ENSG00000276830	1	1	2	5	0	2
ENSG00000272482	5	14	14	6	8	9
ENSG00000204518	0	0	0	0	0	0
ENSG00000226166	0	0	0	0	0	0
ENSG00000188984	0	0	0	0	0	0
ENSG00000157330	1	0	4	0	0	0
ENSG00000116726	0	0	1	0	1	0
ENSG00000116721	0	0	0	0	0	0
ENSG00000228338	0	0	0	0	0	0
ENSG00000239810	0	0	0	0	0	0
ENSG00000231103	0	0	0	0	0	0
ENSG00000179172	1	1	2	0	0	0
ENSG00000120952	0	0	0	0	0	0
ENSG00000243073	0	0	0	0	0	0
ENSG00000187545	0	0	0	0	0	0
ENSG00000204510	0	0	0	0	0	0
ENSG00000207434	0	0	0	0	0	0
ENSG00000234064	0	0	0	0	0	0
ENSG00000232423	0	0	0	0	0	0
ENSG00000274178	0	0	0	0	0	0
ENSG00000274764	0	0	0	0	0	0
ENSG00000229571	0	0	0	0	0	0
ENSG00000277058	0	0	0	1	0	0
ENSG00000277862	0	0	0	0	0	0
ENSG00000236179	0	0	0	0	0	0
ENSG00000275774	0	0	0	0	0	0
ENSG00000229978	0	0	0	0	0	0
ENSG00000233336	0	0	0	0	0	0
ENSG00000280267	0	0	0	0	0	0
ENSG00000179412	0	0	0	0	0	0
ENSG00000204505	0	0	0	0	0	0
ENSG00000279169	0	0	0	0	0	0
ENSG00000279804	0	0	0	0	0	0
ENSG00000250894	0	0	0	0	0	0
ENSG00000270601	0	0	0	0	0	0
ENSG00000231219	0	0	0	0	0	0
ENSG00000207511	0	0	0	0	0	0
ENSG00000182330	0	0	0	0	0	0
ENSG00000204501	0	0	0	0	0	0
ENSG00000237700	0	0	0	0	0	0
ENSG00000228229	0	0	0	0	0	0
ENSG00000204481	0	0	0	0	0	0
ENSG00000204480	0	1	0	0	0	0
ENSG00000204479	0	0	0	0	0	0
ENSG00000204478	0	0	0	0	0	0
ENSG00000162494	0	1	0	1	1	0
ENSG00000259961	0	0	0	0	0	0
ENSG00000215909	0	0	0	0	0	0
ENSG00000162493	824	794	894	994	1009	920
ENSG00000222952	0	0	0	0	1	0
ENSG00000237445	0	0	0	1	0	0
ENSG00000253085	0	0	1	0	0	0
ENSG00000116731	2062	2255	2339	2355	2546	2534
ENSG00000189337	232	258	285	202	230	160
ENSG00000252151	0	0	0	0	0	0
ENSG00000231606	0	0	1	0	0	0
ENSG00000234593	0	0	1	0	0	0
ENSG00000235829	0	0	0	0	0	0
ENSG00000175147	42	35	52	43	43	36
ENSG00000171729	984	889	987	1129	1078	1075
ENSG00000204464	7	0	4	4	9	8
ENSG00000215720	0	3	4	1	0	1
ENSG00000278480	1	2	1	1	3	3
ENSG00000142621	34	27	39	28	26	31
ENSG00000233485	0	0	0	0	0	0
ENSG00000236045	2	0	1	0	0	1
ENSG00000228140	1	2	3	5	3	3
ENSG00000142634	3014	2776	3078	3384	3020	2654
ENSG00000162438	0	3	0	2	1	0
ENSG00000142615	0	0	2	1	1	0
ENSG00000215704	6	2	5	5	5	3
ENSG00000132906	349	340	336	322	296	281
ENSG00000116138	1179	1200	1363	1275	1378	1354
ENSG00000251866	0	0	0	1	1	0
ENSG00000272510	0	1	3	0	1	3
ENSG00000116771	779	741	852	612	552	645
ENSG00000237301	12	31	17	12	14	15
ENSG00000235084	17	21	18	27	18	21
ENSG00000252417	0	0	0	1	1	1
ENSG00000236500	0	0	0	0	0	0
ENSG00000197312	2657	2788	3091	2536	3023	2859
ENSG00000215695	0	0	0	0	0	0
ENSG00000271742	1	1	1	1	1	3
ENSG00000116786	3587	3563	4069	3949	3892	3428
ENSG00000237938	33	55	43	53	55	51
ENSG00000162461	68	74	101	101	89	100
ENSG00000224459	0	0	0	0	0	0
ENSG00000162460	0	0	1	1	0	0
ENSG00000162458	4329	4429	4683	4606	4592	3966
ENSG00000224321	11	18	30	29	21	25
ENSG00000233954	246	205	200	178	155	168
ENSG00000178715	10	7	7	8	9	5
ENSG00000179743	150	158	149	160	154	136
ENSG00000065526	6825	8120	8794	7482	8779	7881
ENSG00000270620	0	1	1	0	0	2
ENSG00000116809	946	942	1101	1059	963	981
ENSG00000234607	0	0	0	0	0	2
ENSG00000231353	0	0	0	0	0	0
ENSG00000275503	0	0	0	0	0	0
ENSG00000224966	0	0	0	0	0	0
ENSG00000183888	0	1	0	2	0	2
ENSG00000233078	0	0	0	0	0	0
ENSG00000173641	3	3	5	0	4	3
ENSG00000186510	5	2	5	3	3	0
ENSG00000232456	7	7	4	6	5	4
ENSG00000184908	22	23	15	17	14	14
ENSG00000185519	174	156	159	140	113	94
ENSG00000142627	8635	8444	9553	9520	9320	8804
ENSG00000227959	41	46	43	32	40	37
ENSG00000224621	21	29	28	37	25	26
ENSG00000234166	0	0	0	0	0	0
ENSG00000142632	396	413	467	460	452	465
ENSG00000237276	189	169	165	258	271	246
ENSG00000132881	228	200	189	145	166	161
ENSG00000233929	6	5	3	7	7	4
ENSG00000037637	976	1002	1075	1086	1188	1119
ENSG00000055070	7633	7414	7803	7380	7073	7352
ENSG00000226457	0	0	0	2	1	3
ENSG00000187144	1	3	0	7	3	2
ENSG00000157191	1808	1809	1940	2361	2392	2184
ENSG00000226029	40	61	56	68	58	55
ENSG00000080947	177	193	176	206	188	200
ENSG00000206652	0	0	0	4	0	0
ENSG00000261135	8	6	13	9	10	10
ENSG00000224174	10	9	11	5	11	9
ENSG00000233421	9	5	15	17	13	12
ENSG00000277344	0	2	2	0	0	0
ENSG00000268991	1	0	0	0	0	0
ENSG00000225710	0	0	0	0	0	0
ENSG00000219481	593	663	593	515	643	652
ENSG00000271732	0	1	0	2	2	2
ENSG00000215908	864	882	934	817	927	890
ENSG00000186301	97	105	103	107	97	91
ENSG00000282143	1	0	0	0	0	0
ENSG00000207513	0	0	0	0	0	0
ENSG00000237847	0	0	0	0	0	0
ENSG00000280114	2	3	2	3	6	1
ENSG00000236698	62	58	78	41	56	58
ENSG00000268869	5	5	5	3	3	3
ENSG00000279151	0	0	0	0	1	0
ENSG00000279132	0	0	0	0	0	0
ENSG00000282740	0	0	0	0	0	0
ENSG00000058453	1143	1157	1244	1181	1155	1112
ENSG00000227684	5	1	2	1	3	3
ENSG00000207389	0	0	0	0	0	0
ENSG00000186715	70	77	83	63	55	72
ENSG00000223643	0	0	0	0	0	0
ENSG00000230239	0	0	0	0	0	0
ENSG00000263811	0	0	0	0	0	0
ENSG00000228549	16	13	14	8	25	21
ENSG00000277234	0	0	0	0	0	0
ENSG00000238142	118	120	127	122	99	121
ENSG00000235241	135	133	120	124	116	112
ENSG00000207005	1	0	1	1	3	2
ENSG00000272426	4	2	5	2	6	4
ENSG00000117122	1092	1109	1105	1411	1302	1179
ENSG00000226526	8	6	6	7	4	10
ENSG00000159363	2008	2331	2376	2383	2268	1944
ENSG00000117118	3223	2967	3237	2875	2983	2708
ENSG00000117115	1282	1427	1575	969	863	895
ENSG00000204362	34	29	45	41	37	52
ENSG00000282843	3	1	4	4	2	0
ENSG00000142623	140	171	173	115	120	104
ENSG00000142619	513	505	584	206	177	190
ENSG00000266634	2	3	1	0	0	0
ENSG00000159339	2	3	0	0	6	3
ENSG00000280226	0	0	0	0	0	0
ENSG00000276747	0	0	3	0	0	0
ENSG00000179051	12885	14051	15472	15208	14965	13972
ENSG00000227751	0	0	0	0	0	0
ENSG00000074964	331	323	372	430	409	334
ENSG00000236648	0	0	0	0	0	0
ENSG00000117148	3	3	6	2	2	3
ENSG00000261781	0	0	0	0	0	0
ENSG00000117154	0	0	0	0	0	0
ENSG00000280222	0	0	0	0	0	0
ENSG00000230035	0	0	0	0	0	0
ENSG00000225387	0	0	0	0	0	0
ENSG00000179023	0	2	0	1	0	1
ENSG00000235282	0	0	0	0	0	0
ENSG00000225478	0	0	0	0	0	0
ENSG00000009709	0	0	0	0	0	0
ENSG00000179002	0	0	0	0	0	0
ENSG00000255275	1	0	2	2	0	0
ENSG00000159423	660	731	677	604	652	555
ENSG00000265606	1	0	0	0	0	0
ENSG00000221662	0	2	1	0	0	0
ENSG00000169991	1326	1375	1435	1360	1324	1312
ENSG00000272084	6	13	10	22	11	9
ENSG00000127481	10599	12420	13657	12064	13490	12440
ENSG00000230424	17	22	11	15	21	18
ENSG00000127463	4150	4330	4770	4473	4552	4380
ENSG00000053372	2893	2795	3060	2505	2317	2268
ENSG00000211454	22	19	14	26	15	11
ENSG00000162482	15	29	28	28	14	28
ENSG00000270728	40	32	42	34	41	32
ENSG00000053371	1414	1310	1392	1282	1212	1080
ENSG00000200403	8	3	4	4	3	4
ENSG00000040487	456	437	522	502	568	480
ENSG00000077549	8393	8049	8321	7798	7768	7675
ENSG00000240490	1	0	2	0	0	0
ENSG00000201609	0	0	0	0	0	0
ENSG00000235185	1	0	0	0	0	1
ENSG00000173436	2983	2979	2948	2863	2981	3373
ENSG00000270136	5	6	3	2	5	1
ENSG00000226396	27	38	35	26	28	26
ENSG00000158747	1104	1190	1250	1309	985	977
ENSG00000158748	6	0	0	1	0	0
ENSG00000162542	600	607	685	701	632	624
ENSG00000178828	1	0	0	0	0	0
ENSG00000235434	0	0	0	0	0	0
ENSG00000169914	1135	1116	1293	1297	1310	1339
ENSG00000188784	0	0	0	0	2	0
ENSG00000242688	0	0	0	0	0	0
ENSG00000188257	1	1	1	0	0	0
ENSG00000127472	0	0	0	0	0	0
ENSG00000117215	0	0	0	0	0	0
ENSG00000158786	0	0	1	2	1	3
ENSG00000227066	0	0	0	0	0	0
ENSG00000187980	0	0	0	0	0	0
ENSG00000225986	0	0	0	0	0	0
ENSG00000162543	13	6	6	7	7	5
ENSG00000228105	0	0	0	0	0	0
ENSG00000158816	1	0	0	0	0	0
ENSG00000226664	0	0	0	0	0	0
ENSG00000236963	2	2	2	0	0	0
ENSG00000226487	0	0	0	0	0	0
ENSG00000162545	7845	7760	7947	6084	5532	5836
ENSG00000090432	1518	1416	1611	1386	1415	1318
ENSG00000215520	3	0	0	0	0	0
ENSG00000183114	23	27	18	17	20	14
ENSG00000158825	98	95	96	134	106	81
ENSG00000158828	502	516	574	502	522	386
ENSG00000117242	121	119	144	138	140	102
ENSG00000244038	9008	8353	8999	8944	8888	8571
ENSG00000117245	88	101	111	87	89	81
ENSG00000235432	2	1	1	0	0	2
ENSG00000189410	1644	1581	1825	1552	1559	1492
ENSG00000233069	2	3	4	1	4	7
ENSG00000127483	10895	11328	12228	11164	11806	11849
ENSG00000075151	3648	3742	4171	3563	3632	3634
ENSG00000251914	0	0	0	0	0	0
ENSG00000221808	0	0	0	0	0	0
ENSG00000233072	3	1	2	2	2	6
ENSG00000236073	0	2	0	1	1	0
ENSG00000235112	0	3	1	2	4	1
ENSG00000117298	3594	3748	4140	4933	4658	4289
ENSG00000236936	4	1	3	2	2	0
ENSG00000231105	12	5	9	14	11	12
ENSG00000236216	0	0	0	0	0	1
ENSG00000228823	0	0	0	0	0	0
ENSG00000236009	0	0	0	0	0	0
ENSG00000227001	22	29	13	18	29	16
ENSG00000187952	13	7	1	3	3	2
ENSG00000186543	0	0	0	1	0	0
ENSG00000142794	549	606	630	585	729	644
ENSG00000176378	0	2	5	1	1	0
ENSG00000162551	22	38	21	28	32	26
ENSG00000233431	0	1	0	0	0	0
ENSG00000076864	247	219	255	287	211	247
ENSG00000090686	3788	3961	4300	4168	4482	4545
ENSG00000231978	0	0	1	2	0	2
ENSG00000187942	25	22	30	27	37	32
ENSG00000142798	3068	3483	3667	4055	4379	3821
ENSG00000232037	0	0	1	0	0	0
ENSG00000283234	4	2	5	8	8	3
ENSG00000219073	0	1	0	2	1	0
ENSG00000273610	0	0	0	0	0	0
ENSG00000201919	0	0	0	0	0	0
ENSG00000142789	0	0	0	3	3	0
ENSG00000278124	0	0	0	1	0	0
ENSG00000201273	0	0	0	0	0	0
ENSG00000228397	1	6	2	3	5	2
ENSG00000218510	390	400	426	327	297	308
ENSG00000070831	12702	12510	13114	12889	13242	13320
ENSG00000230068	16	17	23	23	30	31
ENSG00000271428	9	7	15	13	9	17
ENSG00000271840	2	3	2	1	3	4
ENSG00000162552	29	24	32	66	50	62
ENSG00000266564	0	0	0	0	0	3
ENSG00000234397	0	0	0	0	0	0
ENSG00000279625	0	0	0	0	0	0
ENSG00000184677	1114	1234	1351	1387	1426	1359
ENSG00000237200	7	11	11	9	8	4
ENSG00000070886	22	21	28	15	18	12
ENSG00000276835	0	0	0	0	0	0
ENSG00000173372	0	0	0	0	0	0
ENSG00000159189	0	0	0	0	0	0
ENSG00000173369	0	0	0	0	0	0
ENSG00000133216	1980	1947	2225	2293	2285	2189
ENSG00000265422	0	0	0	0	2	0
ENSG00000225952	0	1	3	2	0	0
ENSG00000264014	0	0	0	0	0	0
ENSG00000215906	0	0	0	0	0	0
ENSG00000227868	12	16	13	13	12	11
ENSG00000004487	6379	6299	6975	6187	6234	5955
ENSG00000240553	0	0	0	2	0	1
ENSG00000263793	0	0	0	1	0	0
ENSG00000266802	0	2	0	1	2	0
ENSG00000169641	5469	5998	6512	5933	6379	6027
ENSG00000229010	2	2	4	6	5	2
ENSG00000206935	2	0	2	0	1	1
ENSG00000252578	1	4	1	4	3	2
ENSG00000179546	22	26	29	39	26	24
ENSG00000215381	0	1	1	0	0	1
ENSG00000261326	160	181	202	172	242	225
ENSG00000125944	11221	10688	12016	9771	10540	10376
ENSG00000125945	1337	1481	1585	1372	1552	1347
ENSG00000249087	151	121	127	108	121	136
ENSG00000201405	0	0	0	0	0	0
ENSG00000271420	2	5	8	5	2	7
ENSG00000204219	353	322	303	302	334	305
ENSG00000232482	1	0	1	0	2	0
ENSG00000088280	690	736	790	650	606	580
ENSG00000007968	310	313	371	328	298	322
ENSG00000235052	9	10	11	8	16	13
ENSG00000117318	2796	2712	2870	2700	2558	2501
ENSG00000197880	1	0	5	1	0	2
ENSG00000229239	0	0	1	0	0	0
ENSG00000142676	24715	22953	24444	22404	20314	18555
ENSG00000011007	3296	3343	3810	3387	3533	3390
ENSG00000236810	119	121	137	93	105	66
ENSG00000057757	1274	1233	1334	1358	1304	1254
ENSG00000011009	4959	4804	5031	4650	4509	4343
ENSG00000117308	2100	2020	2102	1958	1834	1747
ENSG00000117305	831	835	804	902	801	874
ENSG00000179163	693	672	737	844	796	736
ENSG00000188822	1	2	3	3	2	0
ENSG00000229106	0	0	1	0	0	0
ENSG00000232557	0	0	0	0	0	0
ENSG00000264926	0	0	0	0	0	0
ENSG00000230228	0	0	0	0	0	0
ENSG00000189266	5194	4954	5372	5484	6112	5799
ENSG00000188529	6832	6904	7444	6733	7516	7245
ENSG00000215905	0	0	0	0	0	0
ENSG00000225315	2	0	3	0	1	0
ENSG00000142661	8	12	9	23	15	17
ENSG00000230703	0	0	0	1	0	0
ENSG00000142677	547	568	554	799	809	767
ENSG00000185436	867	957	1008	987	1064	955
ENSG00000230023	7	3	4	7	5	7
ENSG00000232298	6	8	7	8	15	14
ENSG00000158055	375	404	434	401	414	408
ENSG00000001460	862	912	937	930	974	912
ENSG00000001461	1950	1929	2268	2008	2028	2084
ENSG00000117602	935	968	1057	1051	1157	1126
ENSG00000264443	1	1	0	0	0	0
ENSG00000184454	7	12	2	5	5	6
ENSG00000227312	0	0	0	0	0	0
ENSG00000239106	0	0	0	0	0	0
ENSG00000133226	6227	6803	7496	6666	7227	6820
ENSG00000169504	5474	5922	6160	6492	7428	7346
ENSG00000238482	0	0	0	1	1	0
ENSG00000020633	31	29	36	36	26	28
ENSG00000278034	0	0	0	0	0	0
ENSG00000229162	0	0	0	0	0	0
ENSG00000261025	0	0	0	0	0	0
ENSG00000264371	0	0	0	0	0	0
ENSG00000233755	0	0	0	0	0	0
ENSG00000233419	0	0	0	0	0	0
ENSG00000231953	0	0	0	0	0	1
ENSG00000117614	1812	1693	1768	1805	1637	1747
ENSG00000117616	1823	1722	1757	1819	1942	2089
ENSG00000272432	7	4	1	4	4	2
ENSG00000261349	7	8	20	9	18	8
ENSG00000187010	3	10	23	19	22	20
ENSG00000224183	1	1	1	1	5	2
ENSG00000259984	8	2	1	3	7	5
ENSG00000183726	4853	4720	4688	5759	5938	6190
ENSG00000188672	32	27	31	29	23	33
ENSG00000238084	10	6	9	5	6	6
ENSG00000204178	750	727	841	892	963	831
ENSG00000157978	2575	2467	2768	2394	2312	2222
ENSG00000225643	3	5	0	0	0	3
ENSG00000117643	17	26	18	30	21	17
ENSG00000233478	0	0	0	0	0	0
ENSG00000162430	2078	2298	2399	2111	2207	1974
ENSG00000255054	0	0	0	0	0	0
ENSG00000228172	25	38	22	40	24	31
ENSG00000117640	627	607	671	627	648	686
ENSG00000272478	0	0	0	0	0	0
ENSG00000127423	530	522	569	500	545	498
ENSG00000236528	4	3	2	2	3	6
ENSG00000182749	1843	1776	1970	1874	1776	1676
ENSG00000207302	0	2	0	2	1	0
ENSG00000117632	11707	11178	12271	11396	11307	10835
ENSG00000229786	1	5	6	0	1	0
ENSG00000223624	2	0	3	2	1	2
ENSG00000158006	458	529	557	467	499	441
ENSG00000207237	0	0	0	0	0	2
ENSG00000252190	0	0	0	0	0	0
ENSG00000252691	0	0	0	0	0	0
ENSG00000158008	11	11	24	16	21	27
ENSG00000158014	11	20	18	14	12	7
ENSG00000158022	0	1	0	0	0	0
ENSG00000175087	309	334	370	332	433	376
ENSG00000197245	11	10	8	8	4	6
ENSG00000282872	0	0	1	0	2	0
ENSG00000236782	19	18	12	21	15	20
ENSG00000142684	94	82	85	79	63	65
ENSG00000142675	806	806	877	867	873	879
ENSG00000188782	4	2	0	1	2	1
ENSG00000236155	0	1	0	1	0	1
ENSG00000278572	0	0	0	0	0	0
ENSG00000130695	2363	2360	2580	2425	2475	2339
ENSG00000270733	2	1	2	7	7	5
ENSG00000142669	7139	6619	7250	6995	6408	5944
ENSG00000158062	838	804	860	717	733	698
ENSG00000169442	5	4	5	4	5	4
ENSG00000176092	1593	1536	1712	1611	1515	1382
ENSG00000225854	5	3	8	10	13	9
ENSG00000176083	0	0	0	0	0	0
ENSG00000131914	2	4	7	1	0	5
ENSG00000117682	1619	1516	1775	1681	1675	1565
ENSG00000223583	2	2	5	1	3	1
ENSG00000225891	6	7	7	7	4	12
ENSG00000198830	28273	27921	28951	28162	27281	28171
ENSG00000224129	1	0	0	0	0	0
ENSG00000117676	4283	4285	4836	4659	4487	4034
ENSG00000238705	0	0	0	0	0	0
ENSG00000243905	0	0	0	0	0	0
ENSG00000252802	0	0	0	0	0	0
ENSG00000252429	0	0	0	0	0	0
ENSG00000229247	0	0	0	0	0	0
ENSG00000238316	0	0	0	0	0	0
ENSG00000235069	0	0	0	0	0	0
ENSG00000260063	27	33	18	29	25	20
ENSG00000117713	3425	3789	4394	3782	4027	3708
ENSG00000060642	544	602	593	643	607	611
ENSG00000241188	0	0	0	2	0	0
ENSG00000204160	1149	1165	1205	1237	1273	1197
ENSG00000175793	41174	38075	41987	47047	43939	42168
ENSG00000226698	0	0	0	0	0	0
ENSG00000142751	1304	1329	1481	1356	1348	1283
ENSG00000198746	988	1006	1031	1040	880	914
ENSG00000090273	8963	8181	9234	7749	7293	7153
ENSG00000131910	14	9	19	16	9	13
ENSG00000175707	876	806	912	886	874	720
ENSG00000172746	4	2	3	0	3	2
ENSG00000224064	0	2	2	1	1	3
ENSG00000225294	3	6	1	4	3	3
ENSG00000253368	3971	3813	4030	3680	3222	3049
ENSG00000158246	22	21	34	29	23	16
ENSG00000280403	0	5	4	3	5	8
ENSG00000090020	3249	3432	3851	4433	4612	4083
ENSG00000229985	0	0	0	0	0	0
ENSG00000214973	0	0	1	1	1	0
ENSG00000225159	9	10	13	7	6	9
ENSG00000225990	0	0	0	0	0	0
ENSG00000224311	0	0	0	0	0	0
ENSG00000142784	1859	1897	2127	2091	2083	1966
ENSG00000252098	0	1	1	2	1	3
ENSG00000243659	5	0	2	4	1	0
ENSG00000186501	871	806	933	954	889	850
ENSG00000206888	5	9	4	3	6	1
ENSG00000241547	20	19	17	18	21	15
ENSG00000142765	812	811	832	730	710	633
ENSG00000142733	2162	2165	2379	2234	2353	2211
ENSG00000142748	11	4	9	7	5	16
ENSG00000174950	96	103	96	96	95	93
ENSG00000231207	0	0	0	0	0	0
ENSG00000181773	231	227	269	247	209	182
ENSG00000158195	8861	8880	9981	9292	9309	8783
ENSG00000241169	1	0	2	4	1	1
ENSG00000237429	8	0	7	2	7	6
ENSG00000126705	1961	2057	2181	2175	2323	1980
ENSG00000000938	4	3	2	5	1	6
ENSG00000235912	4	1	4	1	0	1
ENSG00000233975	4	6	1	2	3	5
ENSG00000126709	64051	58043	60754	85366	77103	77970
ENSG00000225886	563	524	563	651	695	735
ENSG00000206767	0	0	0	0	0	0
ENSG00000226662	0	0	0	0	0	0
ENSG00000207095	0	0	0	0	0	0
ENSG00000009780	564	537	584	535	576	612
ENSG00000231344	0	3	4	4	3	0
ENSG00000230833	0	0	1	4	0	1
ENSG00000117758	1213	1247	1326	1374	1525	1402
ENSG00000269971	2	0	0	0	0	3
ENSG00000270031	0	5	5	1	6	0
ENSG00000223062	0	0	0	0	0	0
ENSG00000117751	2647	2581	2728	2724	2543	2593
ENSG00000252947	2	0	2	1	2	2
ENSG00000278868	0	0	0	0	0	0
ENSG00000130775	1098	1141	1049	1852	1766	1615
ENSG00000117748	2764	2657	2967	2877	2856	2692
ENSG00000130768	371	292	340	318	316	271
ENSG00000227050	0	0	0	1	1	3
ENSG00000158156	298	266	280	309	269	293
ENSG00000158161	2044	2205	2361	2231	2391	2271
ENSG00000238231	1	2	3	1	1	2
ENSG00000240750	1	5	3	2	2	4
ENSG00000228589	27	17	19	22	35	23
ENSG00000228943	0	0	1	0	1	0
ENSG00000214812	0	0	0	0	0	0
ENSG00000253005	0	0	2	1	0	1
ENSG00000169403	1930	1942	2202	2533	2431	2308
ENSG00000126698	5341	5009	5525	5106	4970	4960
ENSG00000130770	4732	4257	4534	4461	3907	4074
ENSG00000270605	93	106	119	92	124	102
ENSG00000271398	9	13	10	12	10	14
ENSG00000130766	1254	1216	1239	1420	1358	1224
ENSG00000130772	843	880	864	805	804	792
ENSG00000204138	3576	3788	4232	4441	4584	4516
ENSG00000206779	1	1	1	2	4	2
ENSG00000229820	1	5	9	3	7	8
ENSG00000221216	4	3	8	3	2	3
ENSG00000180198	4754	4374	5058	4251	4204	3904
ENSG00000242125	2379	2336	2457	2199	2154	2298
ENSG00000274266	0	0	0	0	0	0
ENSG00000200087	66	51	78	67	50	48
ENSG00000231468	12	7	13	6	17	13
ENSG00000279443	37	45	35	41	39	26
ENSG00000180098	740	766	775	816	802	791
ENSG00000197989	1011	1011	1071	975	1025	1031
ENSG00000221539	33	16	22	23	23	29
ENSG00000278274	0	0	0	0	0	0
ENSG00000273544	0	0	0	0	0	0
ENSG00000274582	0	0	0	0	0	0
ENSG00000280498	0	0	0	0	0	0
ENSG00000120656	1228	1296	1333	1241	1083	1129
ENSG00000188060	19	19	23	32	27	24
ENSG00000229388	5	7	4	5	9	5
ENSG00000270103	0	0	0	0	0	0
ENSG00000274978	5	4	1	2	1	2
ENSG00000162419	926	919	1026	1025	1032	1061
ENSG00000252777	0	0	0	1	0	0
ENSG00000198492	3462	3533	3770	3441	3434	3441
ENSG00000116329	1	0	1	1	1	4
ENSG00000233427	0	1	0	0	0	0
ENSG00000199756	0	0	0	0	0	0
ENSG00000159023	1069	1145	1166	1297	1410	1309
ENSG00000225616	1	1	0	2	1	1
ENSG00000206704	0	0	0	0	0	0
ENSG00000277958	0	0	0	0	0	0
ENSG00000253304	853	864	965	963	901	811
ENSG00000225750	1	1	1	0	0	0
ENSG00000116350	7248	7181	7606	7552	7387	7302
ENSG00000277916	0	0	0	0	0	0
ENSG00000116353	709	677	759	594	598	515
ENSG00000237934	3	6	5	5	1	6
ENSG00000060656	985	1025	1098	1135	1106	1051
ENSG00000230523	0	1	0	0	0	0
ENSG00000225011	0	0	0	0	0	0
ENSG00000228176	1	1	1	4	2	0
ENSG00000270927	0	0	0	0	0	0
ENSG00000233399	0	0	0	0	0	0
ENSG00000233372	0	0	0	0	0	0
ENSG00000231251	0	0	0	0	0	0
ENSG00000236335	0	0	0	0	0	0
ENSG00000231949	0	0	0	0	0	0
ENSG00000162510	8	6	14	11	7	7
ENSG00000186056	65	71	60	52	56	48
ENSG00000162511	9	9	5	10	8	7
ENSG00000264773	0	0	0	0	0	0
ENSG00000229607	0	0	0	0	0	0
ENSG00000223382	4	2	2	1	3	1
ENSG00000222784	0	0	0	0	0	0
ENSG00000235143	0	0	0	0	0	0
ENSG00000162512	1114	1205	1432	1207	1206	1108
ENSG00000266210	0	0	0	0	0	0
ENSG00000134644	4505	4844	5214	4613	5134	4752
ENSG00000237329	0	0	2	0	0	1
ENSG00000232768	0	0	2	3	0	1
ENSG00000215900	0	0	0	0	0	0
ENSG00000225142	0	0	0	0	0	0
ENSG00000084628	15	20	26	14	25	18
ENSG00000060688	2825	2675	2906	2686	2798	2480
ENSG00000229447	12	25	19	26	32	46
ENSG00000121766	1589	1523	1682	1569	1477	1503
ENSG00000229044	0	1	3	3	7	7
ENSG00000121769	45	70	71	52	66	69
ENSG00000168528	14310	14068	15603	14013	13372	12076
ENSG00000215899	0	0	3	2	0	0
ENSG00000206981	0	0	0	0	0	4
ENSG00000260386	0	2	0	0	1	0
ENSG00000265961	0	0	0	0	0	0
ENSG00000229167	88	113	122	79	80	67
ENSG00000142910	10354	9731	11060	8925	8889	8002
ENSG00000121764	4	2	2	6	2	6
ENSG00000162517	1819	1752	1949	1857	1762	1672
ENSG00000235790	51	51	63	83	69	85
ENSG00000264078	5	5	2	4	1	5
ENSG00000084636	3304	3122	3564	3765	3727	3531
ENSG00000121753	414	372	469	477	429	385
ENSG00000266580	1	1	0	1	1	1
ENSG00000254545	5	7	6	4	6	5
ENSG00000134668	360	399	366	476	469	414
ENSG00000203620	1	2	0	0	0	2
ENSG00000269967	4	10	2	5	5	7
ENSG00000184007	3571	3746	4037	3890	3689	3680
ENSG00000228634	2	8	6	4	5	4
ENSG00000121774	8329	8357	9283	8583	8669	8118
ENSG00000203325	8	10	11	8	10	12
ENSG00000121775	783	822	908	819	821	685
ENSG00000266203	1	0	2	0	0	0
ENSG00000276493	0	0	1	1	0	0
ENSG00000025800	4282	4936	5394	4851	5243	5250
ENSG00000250135	0	0	0	0	0	0
ENSG00000084652	5623	5812	6122	6328	6462	5889
ENSG00000160050	366	318	326	337	306	299
ENSG00000224066	7	14	12	8	17	9
ENSG00000160051	326	303	341	318	300	354
ENSG00000222046	14	9	10	7	15	10
ENSG00000160055	391	367	403	381	451	376
ENSG00000084623	7576	7076	7498	6710	6428	6260
ENSG00000220785	92	99	100	103	114	86
ENSG00000183615	53	49	32	54	48	65
ENSG00000182866	2	2	4	1	2	3
ENSG00000277617	0	0	0	0	0	0
ENSG00000252450	0	0	0	0	0	0
ENSG00000116478	9409	9179	9790	9462	9294	9422
ENSG00000175130	2665	2578	2785	3586	3287	3135
ENSG00000233775	0	0	0	1	0	2
ENSG00000162526	7	17	25	18	10	17
ENSG00000225828	107	73	74	82	76	72
ENSG00000160058	2209	2152	2311	2604	2596	2538
ENSG00000224333	0	0	0	0	0	0
ENSG00000270850	0	0	0	0	0	0
ENSG00000229259	0	0	0	0	0	0
ENSG00000263529	0	0	0	0	0	0
ENSG00000254553	1	3	1	1	0	0
ENSG00000273274	23	24	22	22	25	28
ENSG00000160062	403	443	486	453	556	520
ENSG00000176261	1242	1241	1198	1164	1093	1231
ENSG00000200591	1	0	7	0	3	7
ENSG00000162521	7360	7423	8165	7890	8597	8203
ENSG00000162520	21	31	34	41	31	25
ENSG00000224409	12	6	15	12	9	13
ENSG00000162522	7071	7604	8238	8234	8213	7184
ENSG00000134684	6418	6163	6918	6105	5976	5778
ENSG00000116497	1723	1806	1991	1938	2063	2136
ENSG00000160097	18	12	20	26	19	26
ENSG00000121905	9	10	14	22	18	20
ENSG00000121900	2433	2249	2339	2446	2306	2002
ENSG00000116514	2626	2515	2680	3456	3380	3181
ENSG00000278966	10	7	5	7	4	13
ENSG00000217644	4	5	2	7	3	4
ENSG00000239670	10	15	11	21	16	13
ENSG00000236065	2	5	9	1	1	3
ENSG00000004455	10283	9920	10485	9212	9361	9384
ENSG00000276645	2	1	0	0	1	0
ENSG00000142920	117	116	122	152	173	147
ENSG00000278997	9	14	10	10	10	9
ENSG00000116525	248	203	237	283	242	206
ENSG00000279179	14	21	18	21	29	17
ENSG00000160094	647	590	690	670	618	584
ENSG00000270115	2	3	5	1	1	1
ENSG00000184389	34	33	44	20	39	45
ENSG00000225313	209	232	310	244	290	264
ENSG00000134686	2592	2652	3044	2918	2703	2479
ENSG00000222112	18	9	24	34	19	22
ENSG00000233246	8	14	6	8	2	13
ENSG00000234512	0	0	0	0	0	0
ENSG00000121903	264	262	284	281	254	261
ENSG00000235907	5	3	2	3	5	4
ENSG00000121904	1	1	1	2	3	1
ENSG00000227000	0	0	0	0	0	0
ENSG00000176256	0	0	0	0	0	0
ENSG00000231163	0	0	0	0	0	0
ENSG00000201148	0	0	0	0	0	0
ENSG00000142698	0	0	0	0	0	0
ENSG00000270241	0	0	0	0	0	0
ENSG00000207941	0	0	0	0	0	0
ENSG00000163866	1784	1767	1737	1720	1762	1673
ENSG00000189280	2585	2494	2658	2603	2543	2390
ENSG00000189433	65	91	60	116	102	85
ENSG00000255811	0	0	1	1	0	3
ENSG00000188910	5273	5079	5545	5691	5441	4903
ENSG00000187513	0	0	0	2	0	0
ENSG00000230163	41	50	45	50	40	42
ENSG00000116544	11	16	17	11	12	10
ENSG00000241014	31	54	62	60	68	62
ENSG00000271741	11	16	20	19	20	22
ENSG00000243749	347	348	359	363	357	357
ENSG00000163867	473	538	511	472	542	594
ENSG00000233940	0	0	0	0	0	0
ENSG00000197056	1342	1622	1790	1481	1739	1751
ENSG00000228348	0	0	1	0	0	0
ENSG00000116560	12751	13369	15147	13180	13846	13566
ENSG00000201868	0	0	0	0	0	0
ENSG00000146463	2825	2928	3181	2860	3201	2954
ENSG00000240374	0	0	1	0	1	1
ENSG00000201542	0	0	0	0	0	0
ENSG00000229994	4	1	8	6	7	12
ENSG00000227409	1	0	2	1	1	2
ENSG00000278702	0	0	0	0	0	0
ENSG00000142687	1731	1749	1958	1950	1970	1846
ENSG00000236274	0	0	0	0	0	0
ENSG00000020129	1451	1544	1586	1478	1472	1360
ENSG00000239636	3	20	8	20	21	16
ENSG00000116819	28	33	30	44	36	29
ENSG00000126067	6505	6409	7002	6987	6941	6713
ENSG00000142686	759	708	840	744	819	770
ENSG00000092853	2657	2958	3257	3274	3379	3362
ENSG00000232335	2	2	1	8	7	3
ENSG00000134698	752	805	913	974	1076	962
ENSG00000092847	1592	1743	1932	1629	1745	1842
ENSG00000271164	0	0	0	0	0	0
ENSG00000271914	0	0	0	0	0	0
ENSG00000126070	1634	1822	1807	1837	1996	2045
ENSG00000271554	7	6	4	6	4	7
ENSG00000232862	4	8	5	11	6	4
ENSG00000092850	39	20	36	42	41	33
ENSG00000116863	1358	1277	1416	1470	1454	1512
ENSG00000171812	552	514	590	625	503	527
ENSG00000054116	2857	2635	2914	2918	2899	2729
ENSG00000116871	11960	11724	12682	13171	12143	11227
ENSG00000264592	0	0	0	0	0	2
ENSG00000054118	8242	8709	9173	8323	8955	8775
ENSG00000231849	0	0	0	0	2	1
ENSG00000214193	1399	1388	1442	1565	1596	1614
ENSG00000142694	611	540	566	635	607	544
ENSG00000116883	378	415	434	512	477	462
ENSG00000196182	540	509	626	550	606	513
ENSG00000181817	718	717	741	603	590	582
ENSG00000222821	0	0	0	0	0	0
ENSG00000116885	158	150	205	191	136	137
ENSG00000201448	0	0	2	1	0	0
ENSG00000116898	2848	2897	3111	2698	2592	2609
ENSG00000119535	0	0	0	0	0	1
ENSG00000230214	0	0	0	0	0	0
ENSG00000234481	0	0	0	0	0	0
ENSG00000163873	0	0	0	0	0	0
ENSG00000264698	0	0	0	0	0	0
ENSG00000207328	0	0	0	0	0	0
ENSG00000223944	0	0	0	0	0	0
ENSG00000252368	0	0	0	0	0	0
ENSG00000230451	0	0	0	0	0	0
ENSG00000233621	69	72	90	160	112	111
ENSG00000163874	954	1062	1162	2726	2625	2404
ENSG00000163875	1439	1337	1479	1339	1361	1258
ENSG00000263675	3	10	9	8	10	16
ENSG00000163877	972	991	1027	1156	1064	1058
ENSG00000232273	3	6	6	4	5	2
ENSG00000237749	2	1	0	1	2	0
ENSG00000163879	4	10	10	9	17	9
ENSG00000134697	4038	3818	4149	3612	3497	3574
ENSG00000169218	0	0	0	0	0	0
ENSG00000116922	875	803	905	771	880	827
ENSG00000134690	3531	3445	3815	3272	3145	3085
ENSG00000183317	13	19	9	9	7	11
ENSG00000200421	0	0	0	0	0	0
ENSG00000214141	0	0	0	0	0	0
ENSG00000227416	0	0	0	0	0	0
ENSG00000185090	499	461	509	446	378	319
ENSG00000233728	0	0	0	0	0	0
ENSG00000196449	692	650	709	674	639	600
ENSG00000197982	1458	1385	1507	1303	1147	1080
ENSG00000188786	1752	1948	2125	2203	2322	2177
ENSG00000235673	3	1	1	2	1	3
ENSG00000204084	406	460	515	547	501	531
ENSG00000230955	0	0	0	0	0	0
ENSG00000252448	0	3	0	0	1	4
ENSG00000222282	0	0	1	1	1	0
ENSG00000277168	0	0	0	0	0	0
ENSG00000183431	5499	5371	5863	5206	5180	5202
ENSG00000212541	8	17	16	10	19	19
ENSG00000183386	632	635	685	711	617	547
ENSG00000183520	2030	2196	2381	2101	2159	2147
ENSG00000185668	13	13	17	26	18	14
ENSG00000224592	8	11	6	11	7	7
ENSG00000223589	0	0	0	0	0	0
ENSG00000265596	0	0	0	0	0	0
ENSG00000237290	0	0	0	0	0	0
ENSG00000275350	0	0	0	1	0	0
ENSG00000200796	0	0	0	0	0	0
ENSG00000238063	0	0	0	0	0	0
ENSG00000215895	3	2	2	0	4	2
ENSG00000116954	982	960	1013	1162	1222	1268
ENSG00000273637	1	0	0	0	0	0
ENSG00000228436	16	14	16	14	12	19
ENSG00000214114	1491	1352	1399	1308	1469	1389
ENSG00000274944	3	12	10	21	9	14
ENSG00000131233	2	1	2	5	2	6
ENSG00000158315	367	361	363	658	617	654
ENSG00000199963	0	1	0	0	0	1
ENSG00000207466	0	0	0	0	0	0
ENSG00000235549	0	0	2	0	0	0
ENSG00000174574	3293	3194	3533	3758	3882	3707
ENSG00000168653	4834	4739	4932	4536	4197	4271
ENSG00000127603	14041	16871	18748	15014	16976	16082
ENSG00000206654	0	1	0	1	0	0
ENSG00000222378	0	0	2	1	3	1
ENSG00000270040	1	0	1	1	4	2
ENSG00000226438	1	0	0	1	1	3
ENSG00000217897	0	0	0	0	1	2
ENSG00000183682	14	9	15	11	10	10
ENSG00000237624	47	32	27	47	36	14
ENSG00000182109	28	33	37	30	31	31
ENSG00000243970	6	7	8	5	12	13
ENSG00000090621	7188	7782	8357	6734	6273	6197
ENSG00000228060	41	37	40	38	40	30
ENSG00000201457	14	19	15	14	19	22
ENSG00000163909	38	26	44	55	44	40
ENSG00000225903	0	0	0	0	0	0
ENSG00000116981	2	0	9	4	3	0
ENSG00000116983	117	106	120	121	148	114
ENSG00000084072	2430	2310	2562	2286	2280	2227
ENSG00000225333	0	0	0	0	0	0
ENSG00000252413	0	0	0	0	0	0
ENSG00000116985	141	168	168	136	156	136
ENSG00000198754	32	39	31	31	39	29
ENSG00000261798	6	5	8	4	6	2
ENSG00000229213	0	0	0	0	0	0
ENSG00000043514	1209	1234	1285	1165	1120	1145
ENSG00000202222	1	1	1	0	1	0
ENSG00000116990	196	207	284	224	203	198
ENSG00000236546	1	2	1	3	3	1
ENSG00000207356	0	0	0	0	0	0
ENSG00000168389	729	713	795	833	796	785
ENSG00000228477	27	24	47	33	53	50
ENSG00000131236	15666	15344	16469	16050	15950	15792
ENSG00000131238	5870	5869	6543	5847	5725	5423
ENSG00000226745	0	0	0	0	0	0
ENSG00000117000	1606	1745	1936	1882	1988	2111
ENSG00000207508	0	2	2	1	1	8
ENSG00000188800	0	0	1	4	0	3
ENSG00000259943	175	208	239	210	201	197
ENSG00000084073	3485	3762	3961	3456	4002	3962
ENSG00000231296	0	7	2	7	0	4
ENSG00000049089	22	23	27	59	47	46
ENSG00000227311	0	0	0	0	0	0
ENSG00000084070	1391	1328	1514	1206	1258	1181
ENSG00000213172	0	0	0	0	0	0
ENSG00000187801	132	152	145	137	138	113
ENSG00000260920	96	89	92	97	103	91
ENSG00000279667	3	9	3	6	7	5
ENSG00000187815	177	219	223	183	221	203
ENSG00000238287	41	34	31	30	32	32
ENSG00000164002	500	526	526	558	613	562
ENSG00000227278	0	0	3	1	1	3
ENSG00000238186	28	23	27	26	34	29
ENSG00000117010	179	202	234	250	212	267
ENSG00000236505	5	0	0	0	0	0
ENSG00000233910	0	0	0	0	0	0
ENSG00000117016	115	119	145	132	155	164
ENSG00000237899	7	8	9	9	6	11
ENSG00000272145	54	47	69	43	54	58
ENSG00000066136	1348	1283	1444	1304	1280	1284
ENSG00000198974	0	0	0	0	0	0
ENSG00000207962	0	0	0	0	0	1
ENSG00000117013	13	16	16	13	9	21
ENSG00000264582	0	0	0	0	0	0
ENSG00000179862	2280	2357	2344	2692	1949	1602
ENSG00000229528	2	0	1	1	1	2
ENSG00000228940	0	0	0	0	0	0
ENSG00000233118	0	0	0	0	0	0
ENSG00000171793	3863	3738	4080	3837	3886	3891
ENSG00000281207	109	160	179	117	145	174
ENSG00000171790	55	50	52	62	57	69
ENSG00000010803	899	924	1077	852	949	908
ENSG00000215893	0	1	0	2	0	0
ENSG00000235358	0	1	3	2	0	2
ENSG00000213987	0	0	0	0	0	2
ENSG00000204060	49	36	35	48	39	41
ENSG00000229901	5	5	3	2	5	6
ENSG00000252563	0	0	0	0	0	0
ENSG00000127129	29	25	22	53	42	42
ENSG00000127124	87	156	167	130	135	121
ENSG00000230881	0	0	0	0	0	0
ENSG00000230638	15	16	15	23	24	15
ENSG00000227538	0	0	0	0	0	0
ENSG00000228776	0	0	0	0	0	0
ENSG00000044012	0	2	0	0	0	0
ENSG00000197273	0	0	0	0	0	2
ENSG00000198815	2109	2254	2588	2269	2463	2482
ENSG00000227527	3	5	9	2	8	3
ENSG00000177181	5	4	5	4	2	3
ENSG00000235002	0	0	0	0	0	0
ENSG00000066185	32	34	20	22	27	18
ENSG00000127125	1543	1419	1593	1472	1399	1368
ENSG00000186409	56	44	43	63	63	64
ENSG00000230116	0	0	1	0	0	0
ENSG00000236876	0	0	1	0	0	1
ENSG00000200254	0	0	0	0	0	0
ENSG00000236180	1	1	0	0	0	0
ENSG00000171960	2083	2026	2149	1905	1876	1913
ENSG00000234917	9	6	6	4	3	7
ENSG00000065978	48864	46134	49495	44593	42198	40343
ENSG00000164007	0	0	1	3	1	2
ENSG00000117385	1223	1150	1291	1286	1251	1187
ENSG00000164008	64	45	53	57	71	62
ENSG00000283580	12	5	10	14	11	12
ENSG00000228452	17	46	42	23	41	35
ENSG00000274386	15	28	20	15	19	10
ENSG00000177868	373	351	342	354	301	316
ENSG00000164010	284	306	319	315	324	292
ENSG00000228192	165	174	177	131	124	152
ENSG00000164011	432	404	462	356	420	377
ENSG00000233708	0	0	0	0	0	0
ENSG00000237090	5	0	0	0	0	0
ENSG00000225099	2	0	0	0	2	0
ENSG00000117394	6088	5948	6685	6466	6376	6003
ENSG00000227533	24	20	24	23	24	18
ENSG00000207256	1	0	0	0	0	0
ENSG00000283136	0	0	0	1	0	0
ENSG00000277513	0	0	0	0	0	0
ENSG00000186973	3	0	2	2	2	1
ENSG00000117395	3520	3247	3513	2700	2637	2568
ENSG00000243710	59	37	34	32	34	47
ENSG00000199240	0	0	0	0	0	0
ENSG00000179178	131	117	115	149	132	125
ENSG00000253313	323	338	311	356	312	291
ENSG00000066056	1	2	2	4	1	2
ENSG00000117400	17	25	21	23	21	26
ENSG00000234694	150	154	137	110	105	95
ENSG00000117399	9571	8767	9748	7657	7404	6756
ENSG00000066322	3862	3632	3992	3700	3736	3632
ENSG00000159479	1596	1597	1678	1607	1508	1605
ENSG00000229431	61	84	74	86	81	93
ENSG00000198198	1712	2103	2198	2059	2252	2108
ENSG00000229372	3	8	1	4	8	6
ENSG00000274975	0	0	0	0	0	0
ENSG00000178922	791	743	816	733	724	745
ENSG00000229348	15	16	20	11	12	11
ENSG00000142949	12821	13851	15017	13229	14013	12842
ENSG00000066135	2571	2498	2940	2693	2874	2795
ENSG00000236200	135	147	142	153	156	137
ENSG00000126091	432	503	523	421	407	372
ENSG00000229444	0	6	3	3	4	1
ENSG00000283414	0	0	0	0	0	0
ENSG00000233674	5	2	6	5	1	0
ENSG00000283477	0	0	0	0	0	0
ENSG00000224751	0	0	1	0	1	0
ENSG00000117407	2613	2651	2821	2215	2055	1930
ENSG00000237950	35	40	41	25	37	47
ENSG00000117408	2344	2285	2634	2333	2356	2061
ENSG00000132768	1096	1057	1138	1027	964	896
ENSG00000117410	3137	2930	3119	3449	3236	3170
ENSG00000117411	1890	1838	2129	1808	1686	1576
ENSG00000159214	718	669	787	1198	1269	1195
ENSG00000196517	794	776	872	1076	1019	921
ENSG00000230615	54	85	87	128	107	105
ENSG00000227163	1	3	1	3	7	2
ENSG00000271647	0	1	1	1	1	0
ENSG00000239560	0	0	0	1	0	0
ENSG00000171872	10	10	10	23	14	7
ENSG00000233514	1	3	0	0	1	0
ENSG00000283039	0	0	0	1	1	1
ENSG00000226804	0	0	4	0	0	0
ENSG00000200171	0	0	0	0	1	0
ENSG00000238037	1	1	0	1	1	0
ENSG00000227994	0	0	0	0	0	0
ENSG00000271329	0	1	2	2	2	4
ENSG00000178028	1319	1319	1378	1343	1380	1473
ENSG00000117419	1729	1548	1715	1466	1361	1302
ENSG00000233602	4	9	9	8	14	4
ENSG00000199385	0	0	0	0	0	0
ENSG00000187147	2460	2532	2566	2295	2153	2100
ENSG00000263381	0	0	0	0	0	0
ENSG00000126106	208	201	212	176	229	182
ENSG00000198520	13	18	22	9	14	21
ENSG00000199377	1	0	1	2	2	3
ENSG00000200169	2	2	3	7	6	4
ENSG00000142945	6119	5908	6440	5971	5862	5777
ENSG00000225721	27	43	29	32	31	35
ENSG00000142937	24582	23195	24459	22282	20409	20349
ENSG00000264294	0	0	0	0	0	0
ENSG00000200913	19	21	29	14	22	27
ENSG00000202031	7	3	9	6	5	8
ENSG00000281859	0	0	0	0	0	0
ENSG00000207421	0	0	0	0	0	0
ENSG00000234093	1	0	8	2	2	1
ENSG00000142959	84	93	99	73	76	73
ENSG00000173846	818	772	849	984	798	848
ENSG00000188396	20	17	31	26	25	35
ENSG00000222009	163	195	223	258	300	281
ENSG00000117425	24	12	21	22	19	21
ENSG00000202444	0	0	0	0	0	0
ENSG00000226499	5	6	5	4	2	2
ENSG00000070785	1051	1104	1175	965	987	923
ENSG00000253039	0	1	0	0	1	2
ENSG00000229815	0	0	0	0	0	4
ENSG00000232369	4	9	1	2	2	1
ENSG00000268949	2	2	8	3	4	4
ENSG00000126107	1496	1322	1525	1430	1460	1403
ENSG00000126088	2907	2549	2868	2599	2494	2323
ENSG00000162415	27	38	20	30	32	18
ENSG00000234315	0	0	0	0	0	0
ENSG00000281912	8	7	7	10	16	6
ENSG00000186603	380	394	438	279	275	258
ENSG00000132781	721	711	770	704	626	595
ENSG00000132773	655	535	650	627	554	556
ENSG00000070759	237	253	229	293	297	283
ENSG00000236872	0	2	0	1	0	4
ENSG00000280670	80	74	77	67	80	67
ENSG00000132763	663	704	744	581	491	531
ENSG00000117450	15666	15110	15774	14586	14118	14284
ENSG00000234379	0	0	0	0	0	1
ENSG00000117448	1959	1882	2068	1831	1843	1757
ENSG00000281133	0	3	0	0	0	1
ENSG00000280836	2	1	1	2	1	0
ENSG00000132780	8564	8606	9224	8758	8606	8503
ENSG00000281112	0	3	0	0	0	0
ENSG00000281825	0	0	0	1	3	0
ENSG00000159588	55	48	69	65	56	55
ENSG00000159592	3984	4184	4510	4332	4670	4518
ENSG00000225447	4	15	9	24	12	20
ENSG00000234329	23	19	28	25	42	29
ENSG00000159596	1806	1646	1815	1704	1779	1632
ENSG00000197429	667	776	788	750	819	801
ENSG00000230896	51	63	52	52	75	69
ENSG00000236111	0	0	0	0	0	1
ENSG00000086015	2608	2807	3116	2731	3054	2560
ENSG00000232467	0	0	0	0	0	0
ENSG00000117461	813	862	907	835	846	797
ENSG00000278139	0	0	0	0	0	0
ENSG00000226957	2	2	2	3	1	0
ENSG00000233114	0	0	1	0	0	0
ENSG00000227857	10	3	4	6	6	2
ENSG00000117472	3317	3207	3530	2932	2961	2695
ENSG00000250719	0	0	0	0	0	0
ENSG00000085998	3093	3025	3126	3063	2809	2832
ENSG00000171357	42	33	39	40	50	32
ENSG00000085999	1625	1553	1672	1721	1665	1626
ENSG00000132128	2472	2324	2790	2550	2432	2275
ENSG00000173660	9368	8864	9232	8539	8041	8232
ENSG00000117481	1222	1311	1314	1318	1239	1261
ENSG00000225779	0	0	2	0	0	1
ENSG00000117480	340	328	399	331	341	280
ENSG00000232022	46	49	48	73	46	66
ENSG00000224863	4	0	9	8	4	4
ENSG00000197587	7	9	8	12	17	13
ENSG00000282881	0	0	0	0	0	0
ENSG00000269956	26	29	30	34	22	40
ENSG00000162456	0	0	0	0	0	0
ENSG00000079277	1517	1576	1730	1751	1743	1657
ENSG00000142961	1147	1100	1200	1525	1494	1576
ENSG00000123472	1695	1766	1852	1738	1791	1652
ENSG00000233647	1	0	0	3	1	3
ENSG00000186118	1	4	3	0	3	6
ENSG00000228237	18	16	8	8	27	10
ENSG00000159658	4127	4437	4959	4576	5196	4816
ENSG00000236476	0	0	0	0	0	0
ENSG00000142973	6	0	7	4	5	0
ENSG00000154198	0	0	0	0	0	0
ENSG00000238145	0	0	0	0	0	0
ENSG00000187048	0	0	0	0	0	0
ENSG00000259832	0	0	0	0	0	0
ENSG00000261196	0	0	0	0	0	0
ENSG00000261593	0	0	0	0	0	0
ENSG00000261290	0	0	0	0	0	0
ENSG00000186377	6	6	2	7	5	0
ENSG00000186160	3	2	1	1	1	1
ENSG00000225154	0	0	0	0	0	0
ENSG00000225506	46	34	37	30	42	40
ENSG00000162365	0	0	5	0	4	0
ENSG00000225514	0	0	0	0	0	0
ENSG00000224805	28	31	30	25	15	21
ENSG00000162366	2	2	3	61	52	60
ENSG00000162367	1	0	1	2	1	1
ENSG00000226252	0	0	0	0	0	0
ENSG00000123473	2378	2648	2763	2731	3017	2936
ENSG00000162368	5158	4889	5626	5309	6032	5448
ENSG00000225762	7	5	4	9	13	3
ENSG00000186790	6	8	18	6	5	7
ENSG00000237424	95	96	89	85	98	101
ENSG00000186564	51	46	43	48	36	31
ENSG00000271355	0	0	0	0	0	0
ENSG00000229554	0	0	0	0	0	0
ENSG00000227883	0	0	0	0	0	0
ENSG00000227947	0	0	0	0	0	0
ENSG00000269113	1	0	0	0	0	0
ENSG00000223814	0	0	0	0	0	0
ENSG00000225028	0	0	0	0	0	0
ENSG00000226133	0	0	0	0	0	0
ENSG00000231413	0	0	0	0	0	0
ENSG00000237180	0	0	0	0	0	0
ENSG00000242267	0	0	0	0	0	0
ENSG00000279096	0	0	0	0	0	0
ENSG00000223720	0	0	0	0	0	0
ENSG00000117834	3	3	1	0	0	0
ENSG00000272491	0	0	0	0	0	0
ENSG00000279214	0	0	0	0	0	0
ENSG00000132122	36	40	44	44	54	43
ENSG00000224986	0	0	0	0	0	0
ENSG00000206700	0	0	0	0	0	0
ENSG00000235105	0	1	1	0	0	1
ENSG00000223175	0	0	0	0	0	0
ENSG00000232514	0	0	0	0	0	0
ENSG00000186094	0	0	0	0	0	0
ENSG00000162373	0	0	0	0	0	0
ENSG00000229846	0	0	0	0	0	0
ENSG00000230114	0	0	0	0	0	0
ENSG00000225623	0	0	0	0	0	0
ENSG00000237478	0	0	0	0	0	0
ENSG00000215887	0	0	0	0	0	0
ENSG00000279324	0	0	0	0	0	0
ENSG00000233595	0	0	0	0	0	0
ENSG00000162374	0	0	0	0	0	1
ENSG00000230828	0	0	0	0	0	0
ENSG00000237337	0	0	0	0	0	0
ENSG00000233407	0	0	0	0	0	0
ENSG00000234080	0	0	0	0	1	0
ENSG00000229316	0	0	0	0	0	0
ENSG00000225671	0	0	0	0	0	0
ENSG00000142700	0	0	0	0	0	2
ENSG00000185104	1835	1794	2097	1727	1681	1645
ENSG00000225767	0	4	5	1	0	10
ENSG00000207194	1	0	2	0	0	0
ENSG00000230585	1	2	5	3	5	4
ENSG00000237130	0	0	0	0	0	0
ENSG00000123080	1155	1085	1130	1064	936	877
ENSG00000265538	0	0	0	0	0	0
ENSG00000275816	0	0	0	0	0	0
ENSG00000204006	0	0	1	0	0	0
ENSG00000200262	0	0	0	0	0	0
ENSG00000213478	0	0	0	0	0	0
ENSG00000203356	0	1	0	1	2	2
ENSG00000123091	2022	2012	2451	2207	2514	2264
ENSG00000233406	2	2	4	9	2	2
ENSG00000236434	3	2	1	0	0	1
ENSG00000085831	25	28	34	47	33	38
ENSG00000261664	0	0	0	1	0	0
ENSG00000085832	1693	1707	2003	1671	2016	1852
ENSG00000232027	1	1	1	5	5	2
ENSG00000206595	0	1	0	0	1	0
ENSG00000238140	2	0	5	0	0	10
ENSG00000227070	4	6	4	4	5	14
ENSG00000252032	0	0	0	0	0	0
ENSG00000227742	0	1	1	0	2	3
ENSG00000117859	3166	3163	3492	3040	3180	3206
ENSG00000236973	0	0	0	0	0	1
ENSG00000232846	0	0	1	0	0	0
ENSG00000212624	0	0	0	0	1	0
ENSG00000078618	8608	8495	9397	8528	9115	8955
ENSG00000266993	27	40	70	49	54	73
ENSG00000272175	3	1	1	0	1	2
ENSG00000230604	0	0	1	1	1	2
ENSG00000169213	721	790	972	965	895	925
ENSG00000200839	2	0	0	1	0	0
ENSG00000229032	0	0	0	0	0	0
ENSG00000264613	0	0	0	0	0	0
ENSG00000117862	2904	2980	3124	3032	2993	2962
ENSG00000198841	485	449	507	415	441	420
ENSG00000223390	1	3	2	4	3	6
ENSG00000228369	1	5	1	4	1	4
ENSG00000134717	2203	2391	2266	2223	2445	2322
ENSG00000157077	1526	1559	1702	1726	1761	1684
ENSG00000241745	0	0	0	0	1	0
ENSG00000228407	4	2	9	9	4	5
ENSG00000223429	1	0	0	4	0	0
ENSG00000224255	2	2	1	0	3	2
ENSG00000236004	0	0	0	0	1	0
ENSG00000237663	1	0	1	0	0	0
ENSG00000213735	0	1	0	0	1	0
ENSG00000154222	1854	1718	1975	2006	1979	1896
ENSG00000272100	7	12	17	8	8	12
ENSG00000224680	3	3	8	13	7	15
ENSG00000085840	1301	1150	1370	1376	1352	1305
ENSG00000134748	2186	2269	2450	2397	2310	2263
ENSG00000134744	2009	2026	2218	2092	2383	2187
ENSG00000272371	2	0	3	0	0	1
ENSG00000236290	1	0	0	0	0	0
ENSG00000116157	21	33	27	41	28	32
ENSG00000182183	120	110	107	117	103	93
ENSG00000162377	2409	2470	2831	2243	2314	2187
ENSG00000233664	0	0	0	0	0	0
ENSG00000239640	0	0	0	0	0	0
ENSG00000162378	1130	1308	1538	1455	1623	1478
ENSG00000252018	0	0	0	0	0	0
ENSG00000228929	3	3	4	3	1	1
ENSG00000206627	0	0	2	2	3	0
ENSG00000203995	568	614	595	507	607	549
ENSG00000242391	11	9	7	9	11	13
ENSG00000121310	1596	1813	1913	1941	1940	2026
ENSG00000230953	20	33	34	35	36	52
ENSG00000231866	0	0	0	0	0	0
ENSG00000116171	2706	2576	2854	2605	2629	2576
ENSG00000264834	0	0	0	0	1	0
ENSG00000266188	0	0	0	0	0	0
ENSG00000265815	0	0	0	0	0	0
ENSG00000237279	0	0	0	0	0	0
ENSG00000236360	0	2	1	2	1	1
ENSG00000226147	1	1	1	2	2	1
ENSG00000279054	1	0	0	0	0	1
ENSG00000174348	0	0	0	0	0	0
ENSG00000232993	0	0	0	0	0	0
ENSG00000227644	0	0	0	0	0	0
ENSG00000162383	0	0	0	0	0	0
ENSG00000235563	0	0	0	0	0	0
ENSG00000277397	0	0	0	0	0	0
ENSG00000157184	789	754	870	848	768	726
ENSG00000236723	12	12	12	14	9	7
ENSG00000162384	1043	966	1065	983	913	984
ENSG00000259818	1	2	3	4	5	3
ENSG00000162385	3407	3293	3388	3143	3207	3287
ENSG00000226754	11	21	17	16	8	11
ENSG00000157193	1367	1307	1562	1099	1291	1207
ENSG00000234578	0	1	0	6	1	2
ENSG00000228838	1	0	1	0	2	3
ENSG00000225030	3	2	5	0	4	2
ENSG00000232762	3	13	7	10	4	5
ENSG00000225675	2	1	5	7	2	3
ENSG00000226938	0	0	0	0	0	0
ENSG00000230138	0	0	0	0	0	0
ENSG00000236253	0	0	0	1	0	0
ENSG00000143006	0	0	0	0	0	0
ENSG00000174332	0	0	0	0	0	0
ENSG00000239007	0	0	0	0	0	0
ENSG00000058804	3157	3348	3777	3117	3305	3214
ENSG00000201003	2	0	1	0	6	1
ENSG00000229687	0	0	0	0	0	0
ENSG00000058799	725	707	723	730	781	778
ENSG00000211452	10	13	12	9	11	16
ENSG00000081870	1296	1131	1226	1310	1227	1391
ENSG00000116212	2072	1945	2317	2164	2122	2047
ENSG00000219102	6	10	3	14	8	4
ENSG00000203985	0	0	3	0	1	0
ENSG00000116209	4554	4503	4635	4809	4932	4839
ENSG00000280378	4	8	14	12	14	8
ENSG00000116205	712	705	816	854	804	765
ENSG00000225183	4	0	0	3	1	2
ENSG00000279049	0	0	0	0	0	0
ENSG00000256407	0	1	2	0	2	4
ENSG00000157211	2	0	0	0	0	1
ENSG00000280425	4	0	1	0	0	1
ENSG00000215883	278	319	355	291	313	331
ENSG00000116221	3911	3555	4112	3747	3343	3293
ENSG00000157216	1104	1095	1137	1279	1153	1180
ENSG00000198711	15	20	21	23	24	27
ENSG00000225632	1	0	1	0	0	0
ENSG00000232245	0	0	0	0	0	0
ENSG00000235741	14	15	6	10	10	15
ENSG00000237173	0	0	0	0	0	0
ENSG00000227453	0	0	0	1	0	0
ENSG00000162390	424	389	411	450	439	442
ENSG00000162391	27	25	21	25	26	18
ENSG00000230728	0	0	0	0	0	0
ENSG00000184313	3	6	2	4	3	7
ENSG00000271723	0	1	1	0	0	1
ENSG00000243725	477	458	558	423	451	401
ENSG00000162396	256	278	350	312	284	257
ENSG00000006555	645	665	644	646	582	561
ENSG00000237453	3	3	11	4	6	1
ENSG00000162398	3	6	4	2	9	7
ENSG00000116133	13766	13645	15405	13755	14213	12725
ENSG00000242396	28	20	26	14	10	27
ENSG00000233203	10	6	10	13	13	8
ENSG00000143001	15	18	14	17	16	8
ENSG00000233271	0	0	0	0	0	0
ENSG00000162399	3	0	2	1	1	0
ENSG00000169174	7476	7635	8357	7937	7786	6954
ENSG00000162402	4165	4491	5029	4169	4830	4576
ENSG00000231090	0	0	0	1	0	0
ENSG00000231095	0	0	0	0	0	0
ENSG00000265822	0	0	0	0	0	0
ENSG00000231900	0	0	0	0	0	0
ENSG00000232198	0	0	0	0	0	0
ENSG00000199831	0	0	0	0	0	0
ENSG00000252162	0	0	0	0	0	0
ENSG00000272051	0	0	0	0	0	0
ENSG00000234810	0	0	0	0	0	0
ENSG00000230250	0	0	0	0	0	0
ENSG00000227104	0	0	0	0	0	0
ENSG00000233079	0	0	0	0	0	0
ENSG00000235612	0	0	0	0	0	0
ENSG00000229871	0	0	0	0	0	0
ENSG00000260971	0	0	0	0	0	0
ENSG00000223956	0	1	0	0	0	0
ENSG00000162407	28	18	16	31	32	34
ENSG00000236776	0	0	0	0	0	0
ENSG00000224980	0	0	0	0	0	0
ENSG00000225475	0	0	0	0	0	0
ENSG00000162409	5	5	5	17	3	21
ENSG00000187889	2	0	0	0	0	0
ENSG00000229913	0	0	0	0	0	0
ENSG00000157131	0	0	0	1	0	0
ENSG00000021852	0	0	0	0	0	0
ENSG00000236341	0	0	0	0	0	0
ENSG00000173406	0	0	0	0	2	0
ENSG00000227935	0	0	0	0	0	0
ENSG00000236888	0	0	0	0	0	0
ENSG00000226759	0	0	0	0	0	0
ENSG00000229887	0	0	0	0	1	1
ENSG00000223416	0	0	0	0	1	0
ENSG00000235038	0	0	0	0	0	0
ENSG00000230546	0	0	0	0	0	0
ENSG00000233216	0	0	0	0	0	0
ENSG00000162600	705	664	780	675	734	695
ENSG00000270209	0	0	0	0	3	0
ENSG00000264128	0	0	0	0	0	0
ENSG00000184292	11993	11212	11975	14266	13327	13505
ENSG00000185839	9	6	13	7	10	7
ENSG00000162601	2068	2447	2486	2215	2622	2659
ENSG00000283445	72	68	69	62	111	75
ENSG00000177606	3071	2872	3075	3564	3361	3447
ENSG00000234807	5	8	5	7	14	9
ENSG00000272226	12	6	3	3	1	7
ENSG00000231740	0	0	0	0	0	0
ENSG00000232453	13	8	12	17	12	7
ENSG00000237352	15	12	22	24	22	25
ENSG00000228121	0	0	3	0	1	0
ENSG00000241042	0	0	0	0	0	0
ENSG00000235215	1	0	1	0	0	4
ENSG00000224609	0	1	0	0	3	2
ENSG00000270457	0	0	0	0	2	0
ENSG00000172456	188	195	186	168	173	165
ENSG00000266150	0	0	0	0	0	0
ENSG00000226883	1	2	0	0	0	0
ENSG00000134709	1734	1945	1968	1742	1957	1894
ENSG00000134716	507	489	558	740	806	738
ENSG00000265535	0	0	0	0	0	0
ENSG00000162598	0	0	0	0	0	0
ENSG00000229332	0	0	0	0	0	0
ENSG00000238242	0	0	0	0	0	0
ENSG00000226476	1	1	0	0	4	0
ENSG00000231252	0	0	0	0	0	0
ENSG00000162599	1243	1344	1491	1308	1385	1427
ENSG00000237928	0	0	0	0	0	0
ENSG00000270742	0	2	0	2	1	12
ENSG00000237853	1	6	1	0	2	2
ENSG00000223920	0	0	0	0	0	0
ENSG00000162604	819	775	782	827	887	873
ENSG00000271200	3	4	2	2	4	4
ENSG00000132849	3104	3455	3749	3575	3682	3562
ENSG00000200575	0	0	1	2	0	1
ENSG00000212360	0	0	2	2	2	1
ENSG00000236646	0	0	0	0	1	0
ENSG00000242860	4	1	0	0	2	1
ENSG00000263908	0	0	0	0	0	0
ENSG00000283690	0	0	0	0	0	0
ENSG00000234204	0	0	0	0	0	0
ENSG00000234088	0	0	0	0	0	0
ENSG00000240563	514	554	553	549	551	517
ENSG00000237227	0	0	3	6	0	2
ENSG00000200174	0	0	0	0	0	0
ENSG00000132854	141	131	130	175	173	142
ENSG00000201153	0	0	0	0	0	1
ENSG00000162607	4383	4394	4865	4896	5311	5168
ENSG00000116641	1777	1925	2156	1757	1994	1940
ENSG00000270549	0	0	0	0	1	0
ENSG00000132855	0	3	7	1	1	3
ENSG00000278967	0	1	2	1	2	4
ENSG00000213703	0	1	0	0	2	2
ENSG00000235545	8	14	2	5	14	10
ENSG00000125703	703	663	721	592	593	609
ENSG00000234318	0	0	0	0	0	0
ENSG00000237163	0	0	0	0	0	0
ENSG00000229537	0	0	0	0	0	0
ENSG00000227485	0	0	0	0	0	0
ENSG00000229225	0	0	0	0	0	0
ENSG00000203605	0	0	0	0	0	0
ENSG00000224209	1	1	0	1	2	1
ENSG00000252259	0	0	0	0	0	0
ENSG00000228734	0	0	2	0	0	0
ENSG00000223683	0	0	0	0	0	0
ENSG00000230798	2	1	3	1	0	3
ENSG00000187140	0	0	0	1	0	0
ENSG00000275836	0	0	0	0	0	0
ENSG00000252784	0	0	0	0	0	0
ENSG00000236674	0	0	0	0	0	0
ENSG00000088035	869	812	879	871	938	918
ENSG00000142856	1887	1935	2143	1888	2025	2031
ENSG00000203965	422	504	561	453	574	531
ENSG00000264271	0	1	0	1	1	0
ENSG00000251720	2	0	11	3	8	2
ENSG00000116652	14	38	60	53	55	58
ENSG00000276884	0	0	0	0	0	0
ENSG00000278287	0	0	0	0	0	0
ENSG00000277565	0	0	0	0	0	0
ENSG00000275823	0	0	0	0	0	0
ENSG00000277689	0	0	0	0	0	0
ENSG00000274199	0	0	0	0	0	0
ENSG00000079739	3018	2984	3075	3099	3030	2988
ENSG00000244256	8	4	11	4	12	10
ENSG00000185483	169	140	160	117	126	104
ENSG00000177452	0	0	0	0	0	0
ENSG00000228056	0	0	1	0	0	0
ENSG00000207190	0	0	0	0	0	0
ENSG00000200508	0	0	0	0	0	0
ENSG00000223949	0	1	0	3	1	1
ENSG00000177414	0	0	1	0	0	0
ENSG00000238653	0	0	0	0	0	0
ENSG00000158966	226	239	286	266	280	273
ENSG00000264470	0	0	0	0	0	0
ENSG00000162437	933	863	1071	903	1015	1020
ENSG00000162434	3843	3883	4445	4881	5429	5269
ENSG00000234784	0	0	0	0	0	0
ENSG00000233877	0	0	2	0	0	0
ENSG00000226891	6	5	5	3	9	6
ENSG00000185031	1	0	0	1	0	1
ENSG00000272506	0	1	0	2	0	2
ENSG00000212257	0	0	0	0	0	0
ENSG00000265996	1	1	1	2	3	2
ENSG00000199135	0	0	0	0	0	0
ENSG00000231485	0	0	0	0	0	1
ENSG00000235804	0	0	0	0	0	0
ENSG00000234496	0	0	0	0	0	0
ENSG00000162433	3182	3330	3556	3430	3751	3600
ENSG00000231622	1	0	0	1	1	0
ENSG00000116675	52	52	72	54	63	56
ENSG00000229294	0	0	0	0	0	0
ENSG00000234144	0	0	0	0	0	0
ENSG00000222624	0	0	0	0	0	0
ENSG00000213625	1398	1516	1650	1720	1824	1764
ENSG00000116678	128	161	156	146	150	131
ENSG00000237852	1	6	0	3	3	0
ENSG00000224570	0	0	0	0	1	0
ENSG00000239319	0	0	0	0	0	0
ENSG00000184588	0	0	0	0	0	0
ENSG00000227466	0	0	0	0	0	0
ENSG00000223152	0	0	0	0	0	0
ENSG00000118473	1	2	1	2	1	1
ENSG00000264720	0	0	0	0	0	0
ENSG00000248458	0	0	0	0	0	0
ENSG00000152760	0	0	0	0	0	0
ENSG00000172410	0	0	0	0	0	1
ENSG00000152763	131	114	162	112	121	139
ENSG00000231080	0	0	0	1	0	0
ENSG00000198160	2388	2604	2853	2658	3330	3121
ENSG00000116704	1168	1117	1278	1173	1264	1161
ENSG00000203963	2	2	4	7	4	8
ENSG00000252433	0	0	0	0	0	0
ENSG00000275678	0	1	0	0	0	0
ENSG00000162594	2	1	1	0	2	2
ENSG00000253074	0	0	0	0	0	0
ENSG00000252116	0	0	0	0	0	0
ENSG00000228523	0	0	0	0	0	0
ENSG00000081985	781	841	972	758	824	713
ENSG00000142864	21359	21422	23498	18989	20092	19087
ENSG00000223263	1	9	6	3	5	5
ENSG00000235200	0	0	0	1	0	1
ENSG00000207504	0	0	0	0	0	0
ENSG00000238139	0	0	0	0	0	0
ENSG00000242482	0	0	0	0	0	0
ENSG00000232048	0	0	0	0	0	0
ENSG00000116717	3893	3635	3837	3673	3474	3593
ENSG00000172380	4983	5062	5378	5177	5889	5877
ENSG00000238778	0	0	0	0	0	0
ENSG00000232284	30	40	42	37	35	36
ENSG00000235055	0	0	0	0	0	0
ENSG00000162595	11	8	10	12	24	11
ENSG00000228431	0	0	0	0	3	0
ENSG00000116729	4228	4042	4543	4165	4011	4021
ENSG00000234383	16	10	20	29	14	17
ENSG00000221203	0	0	1	0	2	2
ENSG00000229133	1	0	0	0	0	0
ENSG00000225242	0	0	0	0	0	0
ENSG00000237622	0	1	1	1	0	0
ENSG00000229440	0	0	1	0	0	1
ENSG00000116745	0	2	5	3	0	1
ENSG00000024526	3978	4117	4453	3637	3970	4010
ENSG00000233589	67	54	63	54	71	77
ENSG00000234264	15	29	30	23	23	20
ENSG00000225167	0	0	0	0	0	0
ENSG00000223883	1	0	0	0	1	2
ENSG00000235446	0	0	0	0	0	0
ENSG00000229639	0	0	0	0	0	0
ENSG00000033122	64	61	101	64	85	90
ENSG00000270615	0	0	0	0	0	0
ENSG00000240692	1	0	0	0	0	0
ENSG00000229359	0	0	0	0	0	0
ENSG00000237919	1	0	0	0	0	0
ENSG00000066557	1354	1360	1489	1298	1631	1436
ENSG00000244389	0	0	0	0	0	1
ENSG00000116754	8461	8804	9372	8583	9245	9365
ENSG00000228988	0	3	0	0	2	3
ENSG00000118454	1066	1218	1214	1180	1219	1235
ENSG00000197568	331	337	363	366	326	327
ENSG00000226088	4	8	6	6	9	6
ENSG00000279230	6	8	6	1	9	8
ENSG00000116761	85	104	107	97	92	86
ENSG00000278636	0	0	0	0	0	0
ENSG00000271992	1	4	1	0	4	2
ENSG00000233020	0	0	0	1	0	0
ENSG00000237033	0	0	0	0	0	0
ENSG00000229051	0	0	0	0	0	0
ENSG00000226208	0	0	0	0	0	0
ENSG00000050628	3	1	2	0	1	0
ENSG00000235782	0	0	0	0	0	0
ENSG00000269933	0	0	0	0	0	0
ENSG00000235079	3	2	6	1	4	14
ENSG00000132485	5282	5221	5605	4922	5615	6005
ENSG00000207721	40	21	39	40	35	43
ENSG00000229956	16	13	13	8	8	12
ENSG00000226324	0	0	0	0	0	0
ENSG00000172260	9	17	17	11	11	13
ENSG00000231985	0	0	0	0	0	0
ENSG00000271618	0	0	0	0	0	0
ENSG00000228853	0	0	0	0	0	0
ENSG00000233994	2	2	2	5	2	1
ENSG00000227207	0	0	0	0	0	0
ENSG00000212366	0	0	0	0	0	0
ENSG00000225087	0	0	0	0	0	0
ENSG00000227016	0	0	0	0	0	0
ENSG00000280317	0	0	0	0	0	0
ENSG00000229636	0	0	0	0	0	0
ENSG00000251825	0	0	0	0	0	0
ENSG00000233973	0	0	0	0	0	0
ENSG00000223479	0	0	0	0	0	1
ENSG00000200601	0	0	0	0	0	0
ENSG00000252005	0	0	0	0	0	0
ENSG00000162620	131	122	127	114	120	133
ENSG00000254685	574	560	704	501	652	691
ENSG00000259030	7	10	11	17	22	11
ENSG00000116783	3	2	1	0	2	2
ENSG00000237324	0	0	1	0	0	0
ENSG00000233894	0	0	0	0	0	0
ENSG00000162621	0	0	0	0	0	0
ENSG00000178965	2	0	5	2	2	4
ENSG00000234497	0	0	0	0	0	0
ENSG00000272864	1	4	7	3	5	4
ENSG00000116791	1562	1551	1764	1470	1662	1684
ENSG00000162623	1639	1688	1955	1600	1704	1707
ENSG00000229943	0	0	0	0	0	0
ENSG00000261213	0	0	0	0	0	0
ENSG00000224127	0	0	0	0	0	0
ENSG00000162624	0	0	0	0	0	0
ENSG00000224149	0	0	0	0	0	0
ENSG00000206999	0	0	0	0	0	0
ENSG00000137968	0	1	0	0	3	1
ENSG00000224493	0	0	0	0	0	0
ENSG00000252338	0	0	0	0	0	0
ENSG00000213579	0	0	0	0	0	0
ENSG00000230863	0	0	0	0	0	0
ENSG00000178193	1	1	1	0	0	1
ENSG00000117054	1333	1251	1424	1299	1521	1374
ENSG00000181227	20	27	22	20	29	17
ENSG00000137955	2954	3098	3213	2842	3116	3293
ENSG00000206620	0	0	0	0	0	0
ENSG00000207241	0	0	0	0	0	0
ENSG00000201487	0	0	0	0	0	0
ENSG00000057468	8	12	11	3	10	8
ENSG00000154007	0	0	0	0	0	0
ENSG00000225605	0	0	0	0	0	0
ENSG00000230027	0	0	0	0	0	0
ENSG00000184005	0	1	2	0	0	0
ENSG00000223905	0	0	0	0	0	0
ENSG00000272855	0	0	0	0	0	0
ENSG00000226415	68	54	66	83	78	76
ENSG00000199921	0	0	0	0	0	0
ENSG00000237552	0	0	0	0	0	0
ENSG00000117069	2	1	3	1	0	0
ENSG00000276081	0	0	0	0	0	0
ENSG00000230498	0	0	0	0	0	1
ENSG00000142892	1408	1575	1651	1458	1676	1664
ENSG00000226084	63	66	59	55	42	52
ENSG00000228187	0	1	1	0	0	0
ENSG00000154027	18	14	22	19	19	12
ENSG00000233099	0	0	0	0	0	0
ENSG00000251767	0	0	0	0	0	0
ENSG00000036549	1998	2112	2274	1969	2246	1997
ENSG00000251785	0	0	0	1	0	0
ENSG00000243437	0	0	0	2	0	0
ENSG00000077254	2495	2474	2787	2751	2990	3077
ENSG00000232672	0	0	0	0	0	0
ENSG00000180488	1000	1217	1299	1147	1472	1267
ENSG00000222849	4	11	8	8	1	8
ENSG00000219201	24	23	15	14	32	28
ENSG00000235613	3	1	2	3	5	3
ENSG00000232015	0	0	0	0	1	1
ENSG00000235927	3	12	9	3	2	4
ENSG00000162614	51	59	57	51	56	59
ENSG00000162613	6598	6820	7329	6594	7216	7361
ENSG00000162616	1755	1747	1987	1877	1990	2056
ENSG00000137960	308	344	353	316	309	320
ENSG00000273338	20	17	30	17	26	20
ENSG00000213561	2	2	6	2	4	2
ENSG00000251958	0	0	0	0	1	0
ENSG00000213560	0	0	0	0	0	0
ENSG00000202263	6	2	2	3	3	6
ENSG00000233333	0	0	1	0	0	0
ENSG00000237413	1	0	4	2	7	1
ENSG00000122420	3	9	10	2	8	15
ENSG00000227556	0	0	0	0	0	0
ENSG00000212308	0	0	0	0	0	0
ENSG00000137959	27400	28529	30940	36159	40438	40311
ENSG00000137965	20952	20238	22025	25386	27142	27270
ENSG00000238015	29	26	35	27	30	31
ENSG00000235400	1	0	0	0	1	0
ENSG00000162618	2	0	2	1	1	2
ENSG00000230787	8	0	0	0	0	0
ENSG00000235011	0	0	0	0	0	0
ENSG00000282898	0	0	0	0	0	0
ENSG00000232676	0	1	0	0	0	0
ENSG00000235756	0	0	0	0	0	0
ENSG00000260322	0	0	0	0	0	0
ENSG00000277670	0	0	0	0	0	0
ENSG00000236407	0	0	0	0	0	0
ENSG00000225598	0	0	0	0	0	0
ENSG00000213559	0	0	0	0	0	0
ENSG00000227062	0	0	0	0	0	0
ENSG00000234108	0	0	0	0	0	0
ENSG00000224326	0	0	0	0	0	0
ENSG00000234184	0	0	0	0	0	0
ENSG00000227937	0	0	0	0	0	0
ENSG00000229752	0	0	0	0	0	0
ENSG00000235089	0	0	0	0	0	0
ENSG00000223026	0	0	0	0	0	0
ENSG00000117114	1201	1282	1437	1181	1471	1254
ENSG00000224494	0	0	0	0	0	0
ENSG00000227288	0	1	3	0	2	1
ENSG00000227960	0	0	0	0	0	0
ENSG00000234953	0	0	0	0	0	0
[truncated: 56,144 more rows]

## Sheet: Supplementary Data 6
Gene	End-bEV-ctrl-MM-3	End-bEV-ctrl-MM-2	End-bEV-ctrl-MM-1	End-bEV-MM-3	End-bEV-MM-2	End-bEV-MM-1
ENSG00000223972	0	0	1	0	0	1
ENSG00000227232	123	95	112	103	118	135
ENSG00000278267	8	6	11	2	11	8
ENSG00000243485	0	0	2	0	2	0
ENSG00000237613	0	0	0	0	0	0
ENSG00000268020	0	0	0	0	0	0
ENSG00000240361	0	0	0	0	0	0
ENSG00000186092	0	0	0	0	0	0
ENSG00000238009	18	18	14	18	13	17
ENSG00000239945	0	0	0	0	0	0
ENSG00000233750	0	0	0	0	1	2
ENSG00000268903	1	1	1	0	2	0
ENSG00000269981	0	0	0	2	0	1
ENSG00000239906	0	1	0	0	0	0
ENSG00000241860	7	13	13	7	16	7
ENSG00000222623	0	0	0	0	0	0
ENSG00000241599	0	0	0	0	0	0
ENSG00000279928	2	2	4	1	2	0
ENSG00000279457	240	231	227	183	240	275
ENSG00000273874	0	0	0	0	3	0
ENSG00000228463	24	16	16	14	12	23
ENSG00000241670	0	0	0	0	0	0
ENSG00000236679	0	0	0	0	0	0
ENSG00000236743	0	0	0	0	0	0
ENSG00000236601	0	0	0	0	0	0
ENSG00000237094	5	20	7	22	11	15
ENSG00000269732	0	0	0	0	0	0
ENSG00000278566	0	0	0	0	0	0
ENSG00000224813	0	0	0	0	0	0
ENSG00000233653	0	0	0	0	1	0
ENSG00000250575	0	0	0	1	0	0
ENSG00000278757	0	0	0	0	0	0
ENSG00000230021	0	4	4	4	0	3
ENSG00000235146	0	0	0	0	0	0
ENSG00000225972	7	4	5	7	3	4
ENSG00000225630	261	232	250	270	255	283
ENSG00000237973	574	531	580	364	437	593
ENSG00000278791	0	0	0	0	0	0
ENSG00000229344	8	9	9	14	15	10
ENSG00000240409	5	8	10	6	4	8
ENSG00000248527	7863	6618	9185	6961	7857	9732
ENSG00000198744	17	12	8	9	21	12
ENSG00000268663	0	0	0	0	1	0
ENSG00000273547	0	0	0	0	0	0
ENSG00000283574	0	1	0	0	0	0
ENSG00000229376	2	13	7	5	8	6
ENSG00000228327	308	315	329	362	344	213
ENSG00000223181	0	0	0	0	1	0
ENSG00000229905	1	0	0	0	3	0
ENSG00000237491	55	62	54	52	42	59
ENSG00000230092	19	9	13	16	12	21
ENSG00000177757	10	11	8	7	12	11
ENSG00000228794	351	404	420	346	412	389
ENSG00000225880	24	21	26	26	32	41
ENSG00000230368	0	0	0	1	0	0
ENSG00000234711	0	0	0	0	0	0
ENSG00000283040	0	0	0	0	0	0
ENSG00000272438	18	13	21	8	4	8
ENSG00000230699	29	26	26	35	20	29
ENSG00000241180	1	4	1	2	3	1
ENSG00000223764	7	4	9	4	11	7
ENSG00000187634	9	11	12	14	10	19
ENSG00000188976	5965	6007	6701	4727	5244	5742
ENSG00000187961	660	474	647	600	619	696
ENSG00000187583	619	584	593	677	773	829
ENSG00000187642	341	363	348	371	399	516
ENSG00000272512	139	158	159	151	183	173
ENSG00000188290	2571	2380	2582	1839	1796	3111
ENSG00000187608	43292	40806	45668	39319	47794	59104
ENSG00000231702	6	12	3	4	8	5
ENSG00000224969	33	37	47	26	30	48
ENSG00000188157	28511	27680	32463	33423	38013	37633
ENSG00000242590	0	0	0	0	0	0
ENSG00000217801	242	304	315	540	534	579
ENSG00000273443	107	88	91	181	164	203
ENSG00000237330	141	132	133	219	230	261
ENSG00000131591	475	430	495	484	497	544
ENSG00000223823	0	0	0	0	0	0
ENSG00000207730	4	9	5	10	8	10
ENSG00000207607	14	9	16	10	16	9
ENSG00000198976	14	10	9	14	13	12
ENSG00000272141	65	52	55	72	77	88
ENSG00000205231	1	4	3	0	2	2
ENSG00000162571	2	4	9	13	5	9
ENSG00000186891	4	4	11	2	5	5
ENSG00000186827	1	0	1	3	1	0
ENSG00000078808	4248	4317	4660	4087	4705	5383
ENSG00000176022	720	692	746	584	659	808
ENSG00000184163	58	59	80	31	51	60
ENSG00000260179	14	14	24	11	14	15
ENSG00000160087	1586	1644	1822	1432	1600	1997
ENSG00000230415	11	17	22	18	21	19
ENSG00000162572	28	34	45	64	61	76
ENSG00000131584	1302	1308	1380	1457	1646	1711
ENSG00000278073	0	0	0	0	0	0
ENSG00000169972	470	475	564	387	522	488
ENSG00000127054	3261	3274	3541	3016	3469	3592
ENSG00000240731	170	144	168	131	149	141
ENSG00000224051	990	1019	1210	1006	1289	1427
ENSG00000169962	22	10	16	9	17	23
ENSG00000107404	4103	4050	4601	3481	4020	4492
ENSG00000162576	623	703	657	745	794	840
ENSG00000175756	4006	3947	4309	3457	3917	5333
ENSG00000223663	0	1	0	2	2	0
ENSG00000221978	4402	4706	4804	5082	5382	5416
ENSG00000224870	707	667	765	655	785	897
ENSG00000242485	2395	2280	2483	1883	2151	2477
ENSG00000264293	0	0	0	0	0	0
ENSG00000272455	67	69	72	64	64	88
ENSG00000235098	29	28	38	36	36	44
ENSG00000225905	0	1	5	4	1	3
ENSG00000205116	0	0	1	0	0	2
ENSG00000225285	0	0	0	0	0	0
ENSG00000179403	85	86	109	82	133	146
ENSG00000215915	1	1	1	3	6	4
ENSG00000160072	2589	2350	2803	2002	2242	2624
ENSG00000197785	2215	2207	2486	1781	2115	2450
ENSG00000205090	21	34	27	29	29	40
ENSG00000160075	4096	3892	4302	3361	3788	4420
ENSG00000215014	13	11	19	16	23	23
ENSG00000279244	0	0	0	0	0	0
ENSG00000274481	0	0	0	0	0	0
ENSG00000228594	441	450	511	349	430	495
ENSG00000272106	69	77	83	58	66	81
ENSG00000197530	1016	1051	1122	1211	1313	1549
ENSG00000189409	2	1	5	2	3	3
ENSG00000248333	1859	1831	2020	1895	2292	2575
ENSG00000272004	8	6	2	6	6	3
ENSG00000189339	1126	1121	1264	1384	1524	1380
ENSG00000269737	51	40	47	45	46	39
ENSG00000215914	0	0	0	0	0	1
ENSG00000008128	573	601	641	622	676	795
ENSG00000268575	92	91	103	107	119	78
ENSG00000227775	84	89	106	143	143	90
ENSG00000215790	132	99	141	169	178	124
ENSG00000008130	2875	3053	3307	2911	3131	3351
ENSG00000078369	14573	14107	15165	13516	14879	15435
ENSG00000231050	11	9	19	12	15	20
ENSG00000169885	8	9	12	20	17	28
ENSG00000178821	53	46	58	32	58	62
ENSG00000142609	8	8	19	11	16	9
ENSG00000233542	0	0	0	1	1	0
ENSG00000187730	0	1	1	2	0	2
ENSG00000226969	1	2	0	1	1	0
ENSG00000067606	761	723	822	755	867	872
ENSG00000271806	3	7	13	14	8	9
ENSG00000182873	97	94	95	89	119	109
ENSG00000162585	890	850	1067	876	969	1246
ENSG00000234396	1	5	8	4	6	7
ENSG00000157933	1744	1906	2120	1902	2202	2005
ENSG00000116151	386	348	415	391	407	315
ENSG00000272161	1	0	2	1	2	0
ENSG00000269896	81	78	84	79	70	82
ENSG00000272420	14	8	19	18	14	23
ENSG00000157916	3711	3771	3912	3736	4254	4274
ENSG00000157911	555	571	598	433	504	451
ENSG00000149527	2965	2722	3146	2853	3452	3129
ENSG00000224387	39	37	31	31	33	17
ENSG00000229393	43	37	39	49	35	37
ENSG00000157881	882	1002	1061	989	1058	1162
ENSG00000197921	24	20	27	20	11	30
ENSG00000272449	23	16	26	24	30	31
ENSG00000238164	17	12	20	35	28	21
ENSG00000157873	343	364	355	534	501	589
ENSG00000225931	3	0	0	1	1	0
ENSG00000228037	0	0	0	0	2	2
ENSG00000157870	809	737	779	716	864	844
ENSG00000142606	1	3	4	1	4	2
ENSG00000237058	0	0	0	0	0	0
ENSG00000215912	19	9	15	5	11	15
ENSG00000283259	0	0	0	0	0	0
ENSG00000233234	0	0	0	0	0	0
ENSG00000231630	4	2	3	0	2	1
ENSG00000169717	0	0	0	0	0	0
ENSG00000177133	0	1	1	0	1	1
ENSG00000142611	28	24	20	27	41	32
ENSG00000283572	0	0	0	0	0	0
ENSG00000226286	0	0	0	0	0	0
ENSG00000279839	0	0	2	1	0	1
ENSG00000272235	0	0	1	0	1	0
ENSG00000130762	1335	1286	1416	1418	1624	1721
ENSG00000272088	1	0	2	1	1	2
ENSG00000162591	118	149	138	198	235	201
ENSG00000207776	0	0	0	0	0	0
ENSG00000238260	7	9	7	8	7	11
ENSG00000158109	1048	1100	1202	1065	1284	1320
ENSG00000116213	757	769	898	844	1035	995
ENSG00000078900	190	199	208	328	338	330
ENSG00000227589	1	0	4	1	2	2
ENSG00000235131	2	1	1	4	3	3
ENSG00000227372	1725	1694	1793	1726	1968	1905
ENSG00000276189	0	0	0	0	0	0
ENSG00000162592	0	1	0	1	1	1
ENSG00000235169	12	11	21	20	20	26
ENSG00000130764	2384	2333	2451	1875	2251	2446
ENSG00000266075	3	4	5	2	10	4
ENSG00000272153	36	71	59	42	48	57
ENSG00000116198	1565	1503	1681	1455	1678	1515
ENSG00000169598	297	294	329	235	271	246
ENSG00000198912	1309	1315	1366	1170	1291	1355
ENSG00000236423	47	48	36	53	55	69
ENSG00000233304	0	0	0	0	0	0
ENSG00000226374	0	0	0	0	0	0
ENSG00000229280	0	0	0	0	0	0
ENSG00000235054	0	0	0	0	0	0
ENSG00000227169	0	0	0	0	0	0
ENSG00000232596	0	0	0	0	0	0
ENSG00000196581	12	19	15	10	8	9
ENSG00000231510	0	0	0	0	0	0
ENSG00000260972	0	0	0	0	0	0
ENSG00000283356	0	0	0	0	0	0
ENSG00000236948	0	0	0	0	0	0
ENSG00000264341	0	0	0	0	0	0
ENSG00000264101	0	0	0	2	0	1
ENSG00000131697	686	685	808	788	870	684
ENSG00000069424	150	158	158	213	230	218
ENSG00000116254	70	88	88	51	78	58
ENSG00000116251	17449	16608	17500	13478	15530	18584
ENSG00000226944	3	1	7	8	10	5
ENSG00000158286	684	662	715	891	887	837
ENSG00000116237	4396	4625	5185	4431	5025	5023
ENSG00000225077	35	50	39	34	48	64
ENSG00000173673	1	0	0	0	0	1
ENSG00000158292	1099	1031	1302	1037	1168	1176
ENSG00000097021	3896	3848	4129	3122	3729	4059
ENSG00000271746	0	0	0	0	0	0
ENSG00000069812	2192	1977	2221	1720	1988	2074
ENSG00000187017	83	82	78	90	78	108
ENSG00000265392	0	0	0	0	0	0
ENSG00000231868	1	0	0	1	1	2
ENSG00000215788	1720	1780	1838	2030	2043	2464
ENSG00000171680	3497	3261	3865	3925	4333	3855
ENSG00000162408	1464	1464	1606	1348	1410	1529
ENSG00000253022	0	2	2	1	2	6
ENSG00000229519	14	17	15	17	16	10
ENSG00000173662	0	1	1	2	4	2
ENSG00000204859	913	977	1024	771	853	980
ENSG00000162413	1150	1162	1293	1364	1503	1512
ENSG00000116273	1352	1355	1536	1447	1703	1658
ENSG00000041988	386	422	435	406	429	480
ENSG00000007923	3412	3404	3631	2829	3220	3048
ENSG00000228750	0	0	0	1	0	0
ENSG00000237436	7	2	12	3	7	5
ENSG00000171735	1459	1590	1504	1332	1446	1768
ENSG00000227950	1	0	0	0	0	1
ENSG00000237365	1	0	0	0	0	0
ENSG00000207056	0	0	0	0	0	0
ENSG00000237402	2	2	0	3	0	2
ENSG00000237728	0	0	0	0	0	0
ENSG00000225126	0	0	0	0	0	0
ENSG00000270171	0	0	0	0	0	0
ENSG00000270035	0	1	0	0	0	0
ENSG00000269978	1	0	1	0	0	0
ENSG00000049245	3792	3894	4232	4016	4192	4237
ENSG00000269925	35	41	27	42	25	36
ENSG00000049246	607	645	792	621	646	578
ENSG00000236266	10	19	10	20	12	10
ENSG00000049247	0	2	0	0	1	0
ENSG00000049249	13	7	5	21	22	22
ENSG00000270330	0	0	0	0	0	0
ENSG00000116288	8523	8437	9014	6555	7583	8806
ENSG00000200344	3	10	8	2	12	5
ENSG00000116285	8116	8695	8969	10682	11619	11231
ENSG00000238290	17	14	28	20	37	23
ENSG00000232848	0	0	0	0	0	0
ENSG00000229305	1	2	1	1	4	0
ENSG00000227634	1	2	1	3	2	5
ENSG00000200975	0	1	0	0	0	0
ENSG00000233645	0	0	0	0	1	0
ENSG00000251977	0	0	0	0	0	0
ENSG00000162426	7	14	17	16	23	17
ENSG00000252254	0	0	0	0	0	0
ENSG00000142599	2053	1996	2314	2226	2481	1947
ENSG00000232912	6	1	1	2	7	2
ENSG00000221083	1	1	0	0	0	0
ENSG00000270282	0	0	1	0	0	0
ENSG00000234619	1	1	0	1	2	0
ENSG00000224315	1	1	2	3	1	0
ENSG00000222511	0	0	0	2	0	1
ENSG00000226545	3	1	5	2	2	7
ENSG00000228423	1	5	6	2	3	4
ENSG00000229716	0	0	0	0	0	0
ENSG00000074800	64427	64055	69679	59925	72851	77287
ENSG00000274258	0	1	0	4	2	1
ENSG00000236269	26	41	38	46	53	38
ENSG00000230679	14	5	6	11	3	10
ENSG00000201725	0	1	0	0	1	0
ENSG00000238249	3	0	3	2	3	2
ENSG00000232208	0	0	0	0	0	0
ENSG00000232663	0	0	0	0	0	0
ENSG00000131686	0	0	1	0	1	0
ENSG00000265141	0	0	0	0	0	0
ENSG00000197241	1	0	2	0	0	0
ENSG00000142583	1	7	2	1	0	3
ENSG00000252404	0	0	0	0	0	0
ENSG00000180758	511	533	507	487	596	579
ENSG00000228526	440	462	483	627	649	634
ENSG00000234546	106	84	94	115	119	180
ENSG00000281937	7	3	6	7	4	7
ENSG00000049239	837	915	984	908	1020	854
ENSG00000171621	507	468	620	655	796	859
ENSG00000252956	0	0	0	0	0	0
ENSG00000235263	0	0	0	0	0	0
ENSG00000171612	503	521	666	360	407	486
ENSG00000231181	10	15	9	13	12	15
ENSG00000188807	1008	919	1077	809	1045	984
ENSG00000171608	492	497	537	835	978	802
ENSG00000179840	0	0	0	1	0	0
ENSG00000233268	0	0	0	1	0	0
ENSG00000231789	9	4	8	5	7	2
ENSG00000171603	11872	11561	13340	13107	15087	15006
ENSG00000271264	2	0	0	0	0	1
ENSG00000280113	5	3	2	5	4	6
ENSG00000178585	2198	2160	2287	1848	2122	2383
ENSG00000223989	0	0	0	0	0	0
ENSG00000162441	1652	1825	1820	1493	1668	1519
ENSG00000228150	27	34	38	43	53	35
ENSG00000173614	642	653	639	620	654	762
ENSG00000202415	4	4	3	2	4	4
ENSG00000283611	5	7	0	8	5	3
ENSG00000265521	1	3	0	4	4	5
ENSG00000241326	0	0	0	0	0	0
ENSG00000162444	79	76	81	59	84	105
ENSG00000130939	2159	2073	2350	2392	2565	2199
ENSG00000224340	0	1	1	0	0	2
ENSG00000233623	0	2	3	4	4	3
ENSG00000201746	3	2	3	5	2	2
ENSG00000054523	4099	4002	4531	4441	4846	3778
ENSG00000264881	0	1	0	0	0	1
ENSG00000199562	2	5	1	2	2	6
ENSG00000264501	0	0	0	0	0	0
ENSG00000142657	7938	7820	8690	7317	8571	8724
ENSG00000271989	1	3	1	3	4	3
ENSG00000251503	59	34	43	32	36	60
ENSG00000175279	420	461	461	296	407	508
ENSG00000241563	12	16	9	12	23	17
ENSG00000160049	4790	5149	5198	3814	4102	4373
ENSG00000203469	0	0	0	0	0	0
ENSG00000142655	1155	1048	1217	926	1171	1415
ENSG00000243267	1	1	2	0	0	2
ENSG00000130940	337	286	388	482	538	375
ENSG00000272078	19	19	24	29	44	35
ENSG00000225158	0	1	0	0	1	0
ENSG00000175262	0	3	2	1	1	3
ENSG00000215785	1	3	2	1	3	4
ENSG00000120948	5854	6330	6409	6147	6628	6743
ENSG00000277726	1	2	1	1	1	0
ENSG00000009724	62	75	57	55	51	38
ENSG00000271895	56	75	53	60	60	67
ENSG00000116649	2212	2036	2233	1272	1596	1768
ENSG00000171824	4008	3880	4298	3899	4557	3977
ENSG00000226849	20	24	25	24	12	32
ENSG00000230337	15	11	18	16	16	26
ENSG00000198793	4953	4656	5517	4563	5653	3581
ENSG00000225602	0	1	2	6	1	2
ENSG00000253086	0	0	0	1	0	1
ENSG00000171819	1	3	5	1	2	0
ENSG00000207451	0	0	0	0	0	1
ENSG00000238173	1	0	2	0	0	0
ENSG00000120942	605	653	749	522	597	538
ENSG00000238199	2	3	0	8	2	3
ENSG00000224338	0	0	0	0	0	0
ENSG00000204624	36	27	40	75	100	78
ENSG00000235643	30	17	17	64	75	88
ENSG00000116661	281	234	270	316	401	512
ENSG00000132879	541	523	573	539	601	736
ENSG00000116663	598	532	579	780	817	968
ENSG00000116670	1227	1198	1320	1191	1489	1547
ENSG00000162490	3	12	6	3	13	13
ENSG00000177674	1732	1713	1898	2268	2733	3012
ENSG00000215910	1	2	1	1	0	0
ENSG00000177553	0	0	0	0	0	0
ENSG00000177000	450	481	538	616	684	665
ENSG00000011021	976	833	1027	973	1082	893
ENSG00000242349	47	48	60	54	53	60
ENSG00000276470	0	0	0	0	0	0
ENSG00000278852	0	0	0	0	0	0
ENSG00000175206	16	16	22	12	8	10
ENSG00000275915	0	0	0	0	0	0
ENSG00000120937	0	0	1	0	1	0
ENSG00000224904	0	0	0	0	0	0
ENSG00000199347	5	1	3	2	3	2
ENSG00000201801	1	4	1	3	1	1
ENSG00000116685	2443	2417	2587	2307	2793	3134
ENSG00000083444	3728	3437	4176	4027	4770	4711
ENSG00000116688	9867	9630	10330	9258	10671	9620
ENSG00000270914	0	0	0	0	0	0
ENSG00000116691	935	875	937	798	915	1139
ENSG00000202461	13	4	5	7	7	10
ENSG00000276869	0	0	0	0	0	0
ENSG00000243539	2	0	0	1	0	0
ENSG00000120949	785	730	783	393	457	444
ENSG00000201135	0	0	0	1	0	0
ENSG00000227875	0	0	0	0	0	0
ENSG00000028137	113	103	114	231	260	270
ENSG00000263676	0	0	0	1	0	0
ENSG00000225196	0	0	0	0	0	0
ENSG00000252969	0	0	0	0	0	0
ENSG00000048707	2917	2878	3251	3185	3582	2164
ENSG00000239149	3	7	5	3	10	14
ENSG00000229484	1	0	0	0	2	1
ENSG00000162496	808	770	796	792	961	1111
ENSG00000221340	3	2	8	3	4	3
ENSG00000276830	7	1	0	1	0	0
ENSG00000272482	2	5	8	8	7	6
ENSG00000204518	0	0	0	0	0	0
ENSG00000226166	0	0	0	0	0	0
ENSG00000188984	0	0	0	0	0	0
ENSG00000157330	0	0	0	0	0	0
ENSG00000116726	0	0	0	0	0	1
ENSG00000116721	0	0	0	0	0	0
ENSG00000228338	0	0	0	0	0	0
ENSG00000239810	0	0	0	0	0	0
ENSG00000231103	0	0	0	0	0	0
ENSG00000179172	0	0	0	0	0	3
ENSG00000120952	0	0	0	0	0	0
ENSG00000243073	0	0	0	0	0	0
ENSG00000187545	0	0	0	0	0	1
ENSG00000204510	0	0	0	0	0	0
ENSG00000207434	0	0	0	0	0	0
ENSG00000234064	0	0	0	0	0	0
ENSG00000232423	0	0	0	0	0	0
ENSG00000274178	0	0	0	0	0	0
ENSG00000274764	0	0	0	0	0	0
ENSG00000229571	0	0	0	0	0	0
ENSG00000277058	0	0	0	0	0	0
ENSG00000277862	0	0	0	0	0	0
ENSG00000236179	0	0	0	0	0	0
ENSG00000275774	1	0	0	0	0	0
ENSG00000229978	0	0	0	0	0	0
ENSG00000233336	0	0	0	0	0	0
ENSG00000280267	0	0	0	0	0	0
ENSG00000179412	0	0	0	0	0	0
ENSG00000204505	0	0	0	0	0	0
ENSG00000279169	0	0	0	0	0	0
ENSG00000279804	0	0	0	0	0	0
ENSG00000250894	0	0	0	0	0	0
ENSG00000270601	0	0	0	0	0	0
ENSG00000231219	0	0	0	0	0	0
ENSG00000207511	0	0	0	0	0	0
ENSG00000182330	0	0	0	0	0	0
ENSG00000204501	0	0	0	0	0	0
ENSG00000237700	0	0	0	0	0	0
ENSG00000228229	0	0	0	0	0	0
ENSG00000204481	0	0	0	0	0	0
ENSG00000204480	0	0	0	0	0	0
ENSG00000204479	0	0	0	0	0	0
ENSG00000204478	0	0	0	0	0	0
ENSG00000162494	0	2	1	0	0	0
ENSG00000259961	0	0	0	0	0	0
ENSG00000215909	0	0	0	0	0	0
ENSG00000162493	727	793	792	1044	1267	1151
ENSG00000222952	0	0	0	0	2	0
ENSG00000237445	2	1	0	0	0	0
ENSG00000253085	0	1	0	0	0	0
ENSG00000116731	2208	2076	2379	2387	2799	2106
ENSG00000189337	243	254	282	176	180	222
ENSG00000252151	0	0	0	0	0	0
ENSG00000231606	0	0	0	0	0	0
ENSG00000234593	0	0	1	1	1	0
ENSG00000235829	0	0	0	0	0	0
ENSG00000175147	52	42	54	44	56	40
ENSG00000171729	949	938	1059	1019	1172	1362
ENSG00000204464	0	4	5	3	3	7
ENSG00000215720	2	0	1	6	3	1
ENSG00000278480	1	0	1	1	0	1
ENSG00000142621	25	29	31	36	47	36
ENSG00000233485	0	1	1	1	0	0
ENSG00000236045	1	0	2	1	2	2
ENSG00000228140	4	2	1	3	11	10
ENSG00000142634	2623	2554	2894	2689	3044	3638
ENSG00000162438	5	0	3	5	2	3
ENSG00000142615	0	1	1	0	0	1
ENSG00000215704	8	1	3	1	2	2
ENSG00000132906	301	298	357	265	317	328
ENSG00000116138	1304	1297	1495	1216	1347	1090
ENSG00000251866	1	1	1	0	0	0
ENSG00000272510	1	4	8	0	2	1
ENSG00000116771	709	779	815	516	539	676
ENSG00000237301	26	20	16	11	15	23
ENSG00000235084	18	21	18	12	13	15
ENSG00000252417	0	0	0	0	0	0
ENSG00000236500	0	0	0	0	0	1
ENSG00000197312	2945	2954	3028	2848	2941	2216
ENSG00000215695	0	0	0	0	0	0
ENSG00000271742	0	4	1	0	4	4
ENSG00000116786	3523	3213	3863	3634	4273	4356
ENSG00000237938	58	56	58	65	59	64
ENSG00000162461	77	80	96	117	116	105
ENSG00000224459	0	0	0	0	1	0
ENSG00000162460	0	0	0	2	0	0
ENSG00000162458	4051	4009	4536	4157	4682	4913
ENSG00000224321	17	17	15	30	38	45
ENSG00000233954	239	181	212	170	217	288
ENSG00000178715	6	8	2	3	10	6
ENSG00000179743	148	138	164	165	174	208
ENSG00000065526	8126	7222	8438	8039	8791	4899
ENSG00000270620	0	1	0	1	1	0
ENSG00000116809	918	956	937	973	1111	1206
ENSG00000234607	1	1	0	3	2	0
ENSG00000231353	1	0	0	0	0	0
ENSG00000275503	0	0	0	0	0	0
ENSG00000224966	0	0	0	0	0	0
ENSG00000183888	0	0	0	0	0	0
ENSG00000233078	0	0	0	0	0	0
ENSG00000173641	2	1	4	3	3	5
ENSG00000186510	3	4	2	7	3	6
ENSG00000232456	5	6	3	1	3	2
ENSG00000184908	30	16	20	29	41	38
ENSG00000185519	139	134	158	89	74	115
ENSG00000142627	8375	8265	9489	8589	9986	9920
ENSG00000227959	29	25	37	33	36	41
ENSG00000224621	29	28	14	47	34	35
ENSG00000234166	0	0	0	0	0	0
ENSG00000142632	422	428	461	400	420	467
ENSG00000237276	190	197	180	204	235	308
ENSG00000132881	178	168	170	148	158	161
ENSG00000233929	8	3	9	3	3	5
ENSG00000037637	1066	1029	1066	1122	1288	1193
ENSG00000055070	7027	7356	7384	6509	7300	8087
ENSG00000226457	3	2	1	0	2	4
ENSG00000187144	2	2	2	4	6	7
ENSG00000157191	1784	1750	1952	2278	2743	2939
ENSG00000226029	52	64	63	59	68	52
ENSG00000080947	179	177	163	213	230	179
ENSG00000206652	0	1	1	2	0	0
ENSG00000261135	10	8	8	5	11	13
ENSG00000224174	8	5	22	4	5	13
ENSG00000233421	9	10	14	13	14	7
ENSG00000277344	0	0	0	0	1	0
ENSG00000268991	0	0	0	0	0	0
ENSG00000225710	0	0	0	0	0	0
ENSG00000219481	572	537	616	668	666	432
ENSG00000271732	0	0	2	2	2	0
ENSG00000215908	820	848	924	865	1008	884
ENSG00000186301	77	99	103	106	74	119
ENSG00000282143	0	1	0	0	0	0
ENSG00000207513	0	0	0	0	0	0
ENSG00000237847	0	0	0	0	0	0
ENSG00000280114	4	3	6	0	0	4
ENSG00000236698	54	78	43	45	41	44
ENSG00000268869	3	4	0	3	1	0
ENSG00000279151	0	0	0	0	0	0
ENSG00000279132	0	0	0	0	0	0
ENSG00000282740	0	0	0	0	0	0
ENSG00000058453	1042	1064	1169	1060	1217	1382
ENSG00000227684	1	3	1	2	1	0
ENSG00000207389	0	0	0	0	0	1
ENSG00000186715	89	82	79	85	81	104
ENSG00000223643	0	0	0	0	0	0
ENSG00000230239	0	0	0	0	0	0
ENSG00000263811	0	0	0	0	0	0
ENSG00000228549	15	12	19	21	11	15
ENSG00000277234	0	0	0	0	0	0
ENSG00000238142	112	107	114	97	124	152
ENSG00000235241	116	107	127	110	140	149
ENSG00000207005	0	1	2	3	4	2
ENSG00000272426	1	2	1	8	6	3
ENSG00000117122	916	886	991	1308	1555	1803
ENSG00000226526	0	3	1	5	2	5
ENSG00000159363	1886	1887	2047	2160	2539	2516
ENSG00000117118	3098	2961	3292	2613	2880	3218
ENSG00000117115	1214	1214	1320	824	949	864
ENSG00000204362	32	26	47	47	34	38
ENSG00000282843	0	2	1	4	1	4
ENSG00000142623	115	116	160	97	114	107
ENSG00000142619	347	350	372	168	165	144
ENSG00000266634	1	0	1	0	1	0
ENSG00000159339	3	5	1	3	1	2
ENSG00000280226	0	0	0	0	0	0
ENSG00000276747	0	0	0	0	0	0
ENSG00000179051	13661	13935	14702	14444	16309	17266
ENSG00000227751	0	0	0	0	0	0
ENSG00000074964	360	360	379	422	470	468
ENSG00000236648	0	0	0	0	0	0
ENSG00000117148	9	1	2	2	2	3
ENSG00000261781	0	0	0	0	0	0
ENSG00000117154	0	0	0	0	0	0
ENSG00000280222	0	0	0	0	0	0
ENSG00000230035	0	0	0	0	0	0
ENSG00000225387	0	0	0	0	0	0
ENSG00000179023	0	0	2	0	1	0
ENSG00000235282	0	0	0	0	0	0
ENSG00000225478	0	0	0	0	0	0
ENSG00000009709	0	0	0	0	0	0
ENSG00000179002	0	0	0	0	0	0
ENSG00000255275	5	2	4	0	1	3
ENSG00000159423	650	662	677	531	602	604
ENSG00000265606	0	0	0	0	0	0
ENSG00000221662	0	0	2	4	0	2
ENSG00000169991	1340	1305	1378	1197	1320	1345
ENSG00000272084	10	18	11	9	24	14
ENSG00000127481	11638	10272	12670	13321	15304	8039
ENSG00000230424	20	35	11	10	16	10
ENSG00000127463	4303	4461	4884	4046	4642	4158
ENSG00000053372	2933	2742	3149	2029	2327	2746
ENSG00000211454	19	19	17	17	12	24
ENSG00000162482	20	30	35	27	30	39
ENSG00000270728	41	35	56	45	47	45
ENSG00000053371	1268	1215	1385	1119	1271	1508
ENSG00000200403	2	6	3	4	3	6
ENSG00000040487	478	401	465	540	567	692
ENSG00000077549	7511	7397	8020	6786	8107	8822
ENSG00000240490	2	0	0	0	0	0
ENSG00000201609	0	0	0	0	0	0
ENSG00000235185	0	0	0	0	0	0
ENSG00000173436	3072	3807	3093	2472	2496	3499
ENSG00000270136	5	3	1	3	3	3
ENSG00000226396	24	29	38	33	41	33
ENSG00000158747	1013	1042	1098	942	1145	1515
ENSG00000158748	0	0	0	3	1	4
ENSG00000162542	595	618	619	632	706	731
ENSG00000178828	0	0	0	0	0	0
ENSG00000235434	0	0	0	0	0	0
ENSG00000169914	1230	1346	1388	1309	1248	1089
ENSG00000188784	0	0	0	0	0	0
ENSG00000242688	0	0	0	0	0	1
ENSG00000188257	18	0	0	0	0	0
ENSG00000127472	0	0	2	0	0	0
ENSG00000117215	0	1	0	0	0	0
ENSG00000158786	1	2	1	2	1	2
ENSG00000227066	0	0	0	2	1	0
ENSG00000187980	0	0	0	0	0	0
ENSG00000225986	0	0	0	0	0	0
ENSG00000162543	4	8	6	3	3	4
ENSG00000228105	0	0	0	0	0	0
ENSG00000158816	0	0	0	0	0	0
ENSG00000226664	0	0	0	0	0	0
ENSG00000236963	0	0	1	0	1	0
ENSG00000226487	0	0	0	0	0	0
ENSG00000162545	7108	6881	6955	4828	5201	6723
ENSG00000090432	1426	1419	1586	1244	1415	1524
ENSG00000215520	0	0	0	0	1	0
ENSG00000183114	14	18	20	11	10	15
ENSG00000158825	86	94	75	117	122	171
ENSG00000158828	410	400	453	467	506	581
ENSG00000117242	137	129	175	127	109	106
ENSG00000244038	8255	8316	8887	8107	9207	9743
ENSG00000117245	97	101	102	81	74	90
ENSG00000235432	2	1	0	0	0	1
ENSG00000189410	1613	1505	1823	1473	1787	1759
ENSG00000233069	5	3	6	3	5	4
ENSG00000127483	11383	11827	12328	11699	12089	10761
ENSG00000075151	3678	3486	3895	3389	3708	3031
ENSG00000251914	0	0	1	0	0	0
ENSG00000221808	0	0	0	0	0	0
ENSG00000233072	1	8	6	0	0	2
ENSG00000236073	0	2	0	0	1	1
ENSG00000235112	1	5	3	0	3	0
ENSG00000117298	3540	3583	4089	4728	5503	5191
ENSG00000236936	0	0	0	3	1	0
ENSG00000231105	9	11	18	14	19	9
ENSG00000236216	0	0	0	0	0	0
ENSG00000228823	0	0	0	0	0	0
ENSG00000236009	0	0	0	0	0	0
ENSG00000227001	19	21	17	19	11	30
ENSG00000187952	2	7	3	12	3	2
ENSG00000186543	1	0	0	0	1	0
ENSG00000142794	576	602	651	681	666	542
ENSG00000176378	0	0	3	2	2	1
ENSG00000162551	27	31	25	28	38	33
ENSG00000233431	0	0	0	0	0	0
ENSG00000076864	203	197	235	253	268	300
ENSG00000090686	3989	4086	4248	4322	4909	4323
ENSG00000231978	0	0	2	0	1	0
ENSG00000187942	17	31	25	29	25	35
ENSG00000142798	3428	3044	3730	4277	5130	3001
ENSG00000232037	0	0	1	1	0	0
ENSG00000283234	1	0	5	3	3	3
ENSG00000219073	0	0	1	1	4	0
ENSG00000273610	0	0	0	0	0	0
ENSG00000201919	0	0	0	0	0	0
ENSG00000142789	0	0	0	0	0	0
ENSG00000278124	0	0	0	0	0	0
ENSG00000201273	0	0	0	0	0	0
ENSG00000228397	1	4	4	0	1	3
ENSG00000218510	402	378	349	245	363	327
ENSG00000070831	12784	13321	13186	12123	12662	13629
ENSG00000230068	14	16	18	20	27	15
ENSG00000271428	17	21	17	8	13	13
ENSG00000271840	1	4	7	3	3	0
ENSG00000162552	21	15	28	69	82	88
ENSG00000266564	0	0	0	0	0	0
ENSG00000234397	0	0	0	0	0	0
ENSG00000279625	0	0	0	0	0	0
ENSG00000184677	1243	1214	1401	1345	1632	1201
ENSG00000237200	6	4	10	14	8	1
ENSG00000070886	12	14	32	19	9	12
ENSG00000276835	0	0	0	0	0	0
ENSG00000173372	0	0	0	0	0	0
ENSG00000159189	0	0	0	0	0	0
ENSG00000173369	0	0	0	0	0	0
ENSG00000133216	1841	1755	2050	2216	2692	2507
ENSG00000265422	0	0	0	2	0	0
ENSG00000225952	4	4	0	1	1	0
ENSG00000264014	0	0	0	0	0	0
ENSG00000215906	0	0	0	0	0	0
ENSG00000227868	10	15	18	14	11	5
ENSG00000004487	6385	6122	6863	5627	6463	5959
ENSG00000240553	1	0	1	0	1	1
ENSG00000263793	0	0	0	0	1	0
ENSG00000266802	0	0	2	0	0	0
ENSG00000169641	5657	5645	6241	5898	6758	5006
ENSG00000229010	4	1	2	6	1	3
ENSG00000206935	2	2	1	0	0	1
ENSG00000252578	4	5	6	1	2	1
ENSG00000179546	29	27	32	29	33	29
ENSG00000215381	0	0	0	0	0	0
ENSG00000261326	180	226	232	224	216	208
ENSG00000125944	11028	11520	11848	9058	9522	10107
ENSG00000125945	1492	1432	1698	1433	1550	1376
ENSG00000249087	136	158	126	127	149	146
ENSG00000201405	0	0	0	0	0	0
ENSG00000271420	4	2	3	1	8	2
ENSG00000204219	278	307	330	281	376	389
ENSG00000232482	0	4	1	0	2	0
ENSG00000088280	715	616	708	547	647	567
ENSG00000007968	301	309	329	324	379	352
ENSG00000235052	3	16	14	12	23	23
ENSG00000117318	2760	2790	2848	2339	2637	3322
ENSG00000197880	0	0	1	1	1	0
ENSG00000229239	1	0	0	2	0	0
ENSG00000142676	23371	21637	25104	18955	23344	27687
ENSG00000011007	3538	3341	3879	3075	3482	3200
ENSG00000236810	102	119	108	77	109	69
ENSG00000057757	1293	1253	1350	1153	1316	1507
ENSG00000011009	4475	4547	4756	3918	4652	5625
ENSG00000117308	1830	1893	1998	1644	1987	2091
ENSG00000117305	796	808	835	821	957	1052
ENSG00000179163	655	697	742	767	873	827
ENSG00000188822	1	4	1	0	6	1
ENSG00000229106	0	0	0	0	0	1
ENSG00000232557	0	0	0	0	0	0
ENSG00000264926	0	0	0	0	0	0
ENSG00000230228	0	0	0	0	0	1
ENSG00000189266	5199	5716	5615	5580	6058	6002
ENSG00000188529	7190	7591	7655	6950	7785	7381
ENSG00000215905	0	0	0	0	0	0
ENSG00000225315	0	0	0	3	3	1
ENSG00000142661	8	11	11	25	39	42
ENSG00000230703	0	0	0	0	0	0
ENSG00000142677	549	534	616	805	879	836
ENSG00000185436	926	901	1036	1046	1079	1104
ENSG00000230023	2	1	5	6	8	16
ENSG00000232298	11	14	8	9	8	10
ENSG00000158055	420	405	456	467	492	446
ENSG00000001460	928	895	1024	984	1105	1026
ENSG00000001461	1971	1944	2209	1875	2179	1972
ENSG00000117602	973	959	1006	1156	1187	1025
ENSG00000264443	0	0	0	0	0	1
ENSG00000184454	4	6	6	2	8	7
ENSG00000227312	0	0	0	0	0	0
ENSG00000239106	0	0	0	0	0	0
ENSG00000133226	6856	6857	7348	6481	7382	6946
ENSG00000169504	5846	6178	6241	7231	7317	6473
ENSG00000238482	0	0	0	2	1	0
ENSG00000020633	26	26	28	37	34	36
ENSG00000278034	0	0	0	0	0	0
ENSG00000229162	0	0	0	0	0	0
ENSG00000261025	0	0	0	0	0	0
ENSG00000264371	0	0	0	0	0	0
ENSG00000233755	0	0	0	0	0	0
ENSG00000233419	0	0	0	0	0	0
ENSG00000231953	0	0	0	0	0	0
ENSG00000117614	1684	1806	1760	1582	1836	2183
ENSG00000117616	1829	1958	1771	2067	2054	2313
ENSG00000272432	0	7	8	5	3	5
ENSG00000261349	4	6	10	9	9	9
ENSG00000187010	15	11	15	25	23	33
ENSG00000224183	1	3	3	11	0	3
ENSG00000259984	1	3	4	6	3	2
ENSG00000183726	4817	4997	5089	5489	5913	6985
ENSG00000188672	23	28	21	21	32	34
ENSG00000238084	1	7	8	3	10	6
ENSG00000204178	777	734	781	777	1074	937
ENSG00000157978	2488	2473	2673	2174	2486	2432
ENSG00000225643	1	2	5	2	3	2
ENSG00000117643	28	17	18	24	16	26
ENSG00000233478	0	0	1	0	0	1
ENSG00000162430	2135	2049	2349	1897	2141	1865
ENSG00000255054	0	0	0	0	0	0
ENSG00000228172	24	32	22	24	27	28
ENSG00000117640	640	615	645	643	705	692
ENSG00000272478	0	0	0	0	0	0
ENSG00000127423	535	519	584	475	489	518
ENSG00000236528	3	7	0	1	3	2
ENSG00000182749	1871	1768	1943	1663	1830	2026
ENSG00000207302	0	2	0	2	1	0
ENSG00000117632	11566	11646	12142	10879	12092	13938
ENSG00000229786	2	3	8	2	2	1
ENSG00000223624	0	1	4	2	1	3
ENSG00000158006	517	536	545	441	447	486
ENSG00000207237	0	0	0	0	0	1
ENSG00000252190	0	0	0	0	0	0
ENSG00000252691	0	0	0	0	0	0
ENSG00000158008	9	9	21	15	22	19
ENSG00000158014	10	16	26	10	11	6
ENSG00000158022	0	2	0	2	0	0
ENSG00000175087	351	409	374	392	378	300
ENSG00000197245	4	6	11	5	6	11
ENSG00000282872	0	0	0	0	0	0
ENSG00000236782	15	12	23	17	23	14
ENSG00000142684	69	64	78	66	70	92
ENSG00000142675	769	830	847	852	1000	1015
ENSG00000188782	2	5	1	2	4	6
ENSG00000236155	1	1	0	1	1	3
ENSG00000278572	0	0	0	0	1	0
ENSG00000130695	2408	2297	2644	2320	2694	2204
ENSG00000270733	1	6	2	5	0	1
ENSG00000142669	5954	5594	6672	6037	7199	8658
ENSG00000158062	732	799	772	638	809	844
ENSG00000169442	8	7	7	4	15	9
ENSG00000176092	1479	1479	1552	1545	1748	1805
ENSG00000225854	8	13	13	9	14	7
ENSG00000176083	0	1	0	0	0	0
ENSG00000131914	3	1	9	4	7	6
ENSG00000117682	1520	1489	1595	1519	1658	1800
ENSG00000223583	1	2	5	5	2	3
ENSG00000225891	7	4	5	4	14	2
ENSG00000198830	27844	29476	28923	26282	30164	32663
ENSG00000224129	0	0	3	0	0	0
ENSG00000117676	3972	3812	4406	4165	4737	4651
ENSG00000238705	0	0	0	0	0	0
ENSG00000243905	0	1	0	0	0	0
ENSG00000252802	0	0	0	0	0	0
ENSG00000252429	0	0	0	0	0	0
ENSG00000229247	0	0	0	0	0	0
ENSG00000238316	0	0	0	0	0	0
ENSG00000235069	0	0	0	0	0	0
ENSG00000260063	36	33	21	24	23	20
ENSG00000117713	3630	3651	4128	3826	4258	3470
ENSG00000060642	495	572	622	527	623	627
ENSG00000241188	0	0	0	0	0	1
ENSG00000204160	1108	1089	1265	1230	1373	1530
ENSG00000175793	37305	36857	40154	41557	50117	61494
ENSG00000226698	0	0	0	0	0	0
ENSG00000142751	1297	1383	1442	1237	1540	1549
ENSG00000198746	948	998	1033	773	990	1190
ENSG00000090273	8203	7905	8630	6515	7441	8783
ENSG00000131910	11	9	14	19	12	22
ENSG00000175707	813	735	854	804	969	1041
ENSG00000172746	2	1	6	2	2	1
ENSG00000224064	2	0	3	0	4	2
ENSG00000225294	3	3	4	6	0	4
ENSG00000253368	3652	3592	3743	2974	3234	4170
ENSG00000158246	22	23	32	28	29	33
ENSG00000280403	7	4	3	11	12	15
ENSG00000090020	3413	3260	3618	4625	5533	4844
ENSG00000229985	0	0	0	0	0	0
ENSG00000214973	0	0	1	0	2	0
ENSG00000225159	11	10	12	7	4	12
ENSG00000225990	0	0	0	0	0	0
ENSG00000224311	0	0	0	0	0	0
ENSG00000142784	1939	1746	2003	2054	2471	2379
ENSG00000252098	0	0	0	0	0	1
ENSG00000243659	3	0	0	0	4	3
ENSG00000186501	902	867	934	880	996	998
ENSG00000206888	3	7	8	8	0	9
ENSG00000241547	19	31	30	24	13	12
ENSG00000142765	770	798	804	706	748	850
ENSG00000142733	2018	1933	2106	2124	2511	2472
ENSG00000142748	6	9	7	7	8	5
ENSG00000174950	88	103	85	82	118	95
ENSG00000231207	0	0	0	0	0	0
ENSG00000181773	260	223	285	185	206	214
ENSG00000158195	8371	8343	9220	8217	9593	8460
ENSG00000241169	0	0	0	1	1	4
ENSG00000237429	8	9	8	3	3	1
ENSG00000126705	1826	1871	2011	2188	2479	2234
ENSG00000000938	0	4	3	6	7	3
ENSG00000235912	2	2	2	2	2	5
ENSG00000233975	4	6	1	7	2	5
ENSG00000126709	65074	66405	67737	76814	89794	113403
ENSG00000225886	622	718	750	719	738	685
ENSG00000206767	0	0	0	1	0	0
ENSG00000226662	0	0	0	0	0	0
ENSG00000207095	0	0	0	0	0	0
ENSG00000009780	567	625	611	550	608	715
ENSG00000231344	2	4	4	5	4	7
ENSG00000230833	2	1	1	1	1	0
ENSG00000117758	1305	1330	1401	1437	1494	1562
ENSG00000269971	1	1	0	0	1	1
ENSG00000270031	3	4	3	6	3	3
ENSG00000223062	0	0	0	0	0	0
ENSG00000117751	2673	2864	3002	2302	2638	2650
ENSG00000252947	3	4	4	3	1	2
ENSG00000278868	0	0	0	0	0	0
ENSG00000130775	1203	1177	1364	1778	2029	2022
ENSG00000117748	2760	2745	2879	2675	3001	3028
ENSG00000130768	320	332	370	281	339	436
ENSG00000227050	6	0	2	7	4	0
ENSG00000158156	296	265	267	300	328	353
ENSG00000158161	2274	2280	2524	2058	2317	1890
ENSG00000238231	0	0	0	2	1	9
ENSG00000240750	6	2	10	2	8	5
ENSG00000228589	19	29	20	26	32	16
ENSG00000228943	0	0	0	0	0	0
ENSG00000214812	0	0	0	0	1	0
ENSG00000253005	0	0	0	2	0	1
ENSG00000169403	1741	1875	1978	2217	2728	2794
ENSG00000126698	5262	5328	5694	4281	5060	5805
ENSG00000130770	4271	4064	4707	3971	4581	5528
ENSG00000270605	111	109	108	120	116	139
ENSG00000271398	15	12	13	10	8	18
ENSG00000130766	1244	1207	1425	1256	1575	1584
ENSG00000130772	844	821	933	704	822	966
ENSG00000204138	3959	4116	4340	4307	4920	4552
ENSG00000206779	1	1	0	6	2	0
ENSG00000229820	1	14	5	2	3	13
ENSG00000221216	4	2	8	5	4	7
ENSG00000180198	4935	4651	4994	3583	4367	4499
ENSG00000242125	2422	2628	2856	1954	2006	2220
ENSG00000274266	0	0	0	0	0	0
ENSG00000200087	73	76	76	46	57	48
ENSG00000231468	10	13	7	9	12	16
ENSG00000279443	39	50	44	32	32	49
ENSG00000180098	742	753	768	807	880	951
ENSG00000197989	1101	1138	1163	857	994	1142
ENSG00000221539	32	34	43	24	30	33
ENSG00000278274	0	0	0	0	0	0
ENSG00000273544	0	0	0	0	0	0
ENSG00000274582	0	0	0	0	0	0
ENSG00000280498	0	0	0	0	0	0
ENSG00000120656	1188	1298	1294	1078	1173	1370
ENSG00000188060	23	16	9	29	41	30
ENSG00000229388	11	8	13	6	3	7
ENSG00000270103	0	0	0	0	0	0
ENSG00000274978	5	2	3	2	1	0
ENSG00000162419	896	918	952	1009	1091	1130
ENSG00000252777	0	0	0	0	1	0
ENSG00000198492	3516	3542	3777	3402	3654	3677
ENSG00000116329	5	4	4	0	0	5
ENSG00000233427	0	0	0	0	0	0
ENSG00000199756	1	0	0	0	0	0
ENSG00000159023	1192	1189	1214	1478	1592	1232
ENSG00000225616	1	1	1	1	3	2
ENSG00000206704	0	0	0	0	0	0
ENSG00000277958	2	0	0	0	0	0
ENSG00000253304	761	779	825	855	1091	1120
ENSG00000225750	0	1	0	0	0	1
ENSG00000116350	7006	7060	7449	6704	7770	8393
ENSG00000277916	0	0	0	0	0	0
ENSG00000116353	698	663	768	503	562	617
ENSG00000237934	5	7	8	2	4	1
ENSG00000060656	1056	942	1086	1136	1237	1249
ENSG00000230523	0	0	0	1	0	3
ENSG00000225011	0	0	0	0	0	0
ENSG00000228176	1	2	0	1	2	1
ENSG00000270927	0	0	0	0	0	0
ENSG00000233399	0	0	0	0	0	0
ENSG00000233372	0	0	0	0	0	0
ENSG00000231251	0	0	0	0	0	0
ENSG00000236335	0	0	0	0	0	0
ENSG00000231949	0	0	0	0	0	0
ENSG00000162510	10	10	15	10	8	6
ENSG00000186056	52	54	66	45	66	30
ENSG00000162511	7	5	9	21	19	18
ENSG00000264773	0	0	0	0	0	0
ENSG00000229607	0	0	0	0	0	0
ENSG00000223382	4	3	0	1	3	3
ENSG00000222784	0	0	0	0	0	0
ENSG00000235143	0	0	0	0	0	0
ENSG00000162512	1062	1066	1217	1267	1480	1431
ENSG00000266210	1	0	0	0	0	0
ENSG00000134644	4969	4699	5264	4665	5307	4383
ENSG00000237329	1	2	0	4	4	1
ENSG00000232768	5	0	0	4	0	2
ENSG00000215900	0	0	0	0	1	0
ENSG00000225142	0	0	0	0	0	0
ENSG00000084628	19	17	30	14	13	14
ENSG00000060688	2922	2849	3009	2285	2819	2910
ENSG00000229447	40	33	31	30	44	30
ENSG00000121766	1600	1532	1636	1539	1773	1875
ENSG00000229044	4	1	1	7	6	6
ENSG00000121769	61	57	69	52	61	33
ENSG00000168528	13615	13153	15425	12507	14486	15008
ENSG00000215899	0	0	0	0	2	0
ENSG00000206981	0	0	0	0	0	0
ENSG00000260386	0	6	1	2	2	0
ENSG00000265961	0	0	0	0	0	0
ENSG00000229167	108	78	92	78	90	51
ENSG00000142910	8537	8003	9416	7757	8970	9482
ENSG00000121764	4	7	7	4	7	3
ENSG00000162517	1870	1914	2101	1563	1832	1929
ENSG00000235790	65	48	67	77	65	80
ENSG00000264078	0	2	2	6	1	2
ENSG00000084636	3090	3043	3506	3827	4439	4628
ENSG00000121753	384	351	445	535	604	568
ENSG00000266580	1	2	2	0	0	2
ENSG00000254545	5	8	4	5	7	17
ENSG00000134668	320	343	374	492	574	533
ENSG00000203620	0	1	0	0	0	0
ENSG00000269967	12	9	7	11	4	18
ENSG00000184007	3776	3816	4017	3532	4113	4105
ENSG00000228634	9	10	10	12	3	10
ENSG00000121774	8172	8482	9115	7585	8312	9056
ENSG00000203325	6	11	6	11	8	7
ENSG00000121775	816	778	770	700	868	868
ENSG00000266203	2	1	0	3	0	2
ENSG00000276493	0	0	0	0	0	0
ENSG00000025800	4782	5182	5357	4730	5287	4648
ENSG00000250135	0	0	0	0	0	0
ENSG00000084652	5771	5520	6389	6368	7291	6686
ENSG00000160050	347	340	354	295	330	456
ENSG00000224066	12	11	13	5	9	11
ENSG00000160051	323	343	345	317	363	360
ENSG00000222046	12	10	7	8	15	9
ENSG00000160055	399	342	398	409	501	509
ENSG00000084623	7160	6767	7670	5769	6632	7308
ENSG00000220785	74	89	87	107	102	117
ENSG00000183615	37	39	43	65	64	82
ENSG00000182866	3	1	5	7	15	13
ENSG00000277617	0	0	0	0	0	0
ENSG00000252450	0	0	0	0	0	0
ENSG00000116478	9046	9167	9662	9016	10063	10635
ENSG00000175130	2519	2534	2804	3466	3808	4589
ENSG00000233775	0	0	2	1	0	2
ENSG00000162526	17	26	21	10	24	12
ENSG00000225828	68	101	73	75	76	110
ENSG00000160058	2144	2125	2105	2455	2905	3037
ENSG00000224333	1	0	0	0	2	0
ENSG00000270850	0	0	0	0	0	0
ENSG00000229259	0	1	0	0	0	0
ENSG00000263529	0	0	0	0	0	0
ENSG00000254553	0	0	0	1	1	1
ENSG00000273274	25	22	19	28	28	25
ENSG00000160062	434	413	473	500	518	567
ENSG00000176261	1264	1319	1291	1129	1220	1370
ENSG00000200591	3	2	6	3	5	3
ENSG00000162521	7597	7667	8107	8162	9088	8849
ENSG00000162520	25	19	36	30	40	33
ENSG00000224409	9	8	14	7	13	16
ENSG00000162522	7524	6906	8076	7790	9042	8349
ENSG00000134684	6493	6423	7470	5317	6234	6439
ENSG00000116497	1904	1949	2040	2090	2203	1995
ENSG00000160097	19	14	28	22	34	23
ENSG00000121905	17	17	9	17	18	22
ENSG00000121900	2182	2099	2316	2046	2410	3084
ENSG00000116514	2552	2556	2734	3361	3711	3919
ENSG00000278966	5	6	4	11	11	15
ENSG00000217644	8	2	4	6	6	5
ENSG00000239670	3	20	9	9	10	18
ENSG00000236065	4	5	4	1	0	1
ENSG00000004455	10336	10306	10668	8245	9565	9913
ENSG00000276645	3	1	2	1	1	2
ENSG00000142920	131	111	149	149	184	193
ENSG00000278997	8	11	9	10	8	13
ENSG00000116525	249	215	238	212	249	267
ENSG00000279179	16	23	28	18	16	17
ENSG00000160094	620	644	678	523	584	709
ENSG00000270115	7	4	2	2	3	2
ENSG00000184389	39	31	38	34	46	19
ENSG00000225313	257	277	303	289	246	218
ENSG00000134686	2446	2363	2740	2482	2889	3111
ENSG00000222112	26	24	17	21	28	13
ENSG00000233246	9	8	13	8	6	1
ENSG00000234512	0	0	0	0	0	0
ENSG00000121903	259	219	266	285	292	213
ENSG00000235907	1	4	5	2	0	3
ENSG00000121904	1	1	3	1	0	4
ENSG00000227000	0	0	0	0	0	0
ENSG00000176256	0	0	0	0	0	0
ENSG00000231163	0	0	0	0	0	0
ENSG00000201148	0	0	0	0	0	0
ENSG00000142698	0	0	0	0	0	0
ENSG00000270241	0	0	0	0	0	0
ENSG00000207941	0	0	0	0	0	0
ENSG00000163866	1707	1694	1869	1494	1791	2074
ENSG00000189280	2281	2148	2390	2314	2771	3026
ENSG00000189433	66	88	69	106	127	136
ENSG00000255811	0	0	0	0	0	0
ENSG00000188910	4561	4491	5147	4988	5877	6324
ENSG00000187513	1	0	4	6	2	2
ENSG00000230163	38	59	37	37	40	52
ENSG00000116544	5	8	5	17	7	12
ENSG00000241014	42	75	59	70	64	74
ENSG00000271741	12	14	23	26	21	13
ENSG00000243749	284	327	292	291	428	399
ENSG00000163867	498	577	572	546	549	542
ENSG00000233940	0	0	0	0	0	0
ENSG00000197056	1749	1745	1873	1633	1532	1358
ENSG00000228348	0	0	0	0	0	0
ENSG00000116560	14422	14643	15298	12591	13838	14020
ENSG00000201868	0	0	0	0	0	0
ENSG00000146463	2901	2866	3043	2949	3195	2441
ENSG00000240374	1	0	0	0	0	0
ENSG00000201542	0	3	0	2	0	0
ENSG00000229994	4	6	7	12	8	5
ENSG00000227409	1	1	2	1	3	1
ENSG00000278702	0	0	0	0	0	0
ENSG00000142687	1769	1802	1853	1789	1976	1969
ENSG00000236274	0	1	0	0	1	1
ENSG00000020129	1434	1406	1659	1429	1511	1435
ENSG00000239636	16	5	10	16	17	27
ENSG00000116819	37	32	31	40	32	30
ENSG00000126067	6674	6577	7300	6428	7301	7606
ENSG00000142686	721	752	785	774	857	1042
ENSG00000092853	2961	3008	3180	3601	3889	3781
ENSG00000232335	6	2	8	2	4	3
ENSG00000134698	752	801	775	1012	1117	1006
ENSG00000092847	1759	1893	1956	1694	1845	1466
ENSG00000271164	0	0	0	0	0	0
ENSG00000271914	0	0	0	0	0	0
ENSG00000126070	1869	1830	1985	1998	1976	1720
ENSG00000271554	5	12	15	12	8	6
ENSG00000232862	8	5	4	9	7	14
ENSG00000092850	32	33	43	38	34	43
ENSG00000116863	1370	1331	1338	1332	1567	1754
ENSG00000171812	445	408	491	545	729	675
ENSG00000054116	2804	2938	2914	2572	2935	3404
ENSG00000116871	10509	10339	11906	11592	13098	15492
ENSG00000264592	0	1	0	0	0	1
ENSG00000054118	8309	8427	8954	8113	9271	8303
ENSG00000231849	0	1	1	0	0	0
ENSG00000214193	1430	1338	1513	1902	1942	1802
ENSG00000142694	497	504	544	607	604	819
ENSG00000116883	373	433	441	576	579	728
ENSG00000196182	485	464	590	520	568	608
ENSG00000181817	689	664	703	501	563	742
ENSG00000222821	0	0	0	0	0	0
ENSG00000116885	183	177	174	115	155	201
ENSG00000201448	0	2	0	0	1	0
ENSG00000116898	2765	2694	3069	2502	2889	3112
ENSG00000119535	1	0	0	1	0	0
ENSG00000230214	0	0	0	0	0	0
ENSG00000234481	0	0	0	0	0	0
ENSG00000163873	0	0	0	0	0	0
ENSG00000264698	0	0	0	0	0	0
ENSG00000207328	0	0	0	0	0	0
ENSG00000223944	0	0	0	0	0	0
ENSG00000252368	0	0	0	0	0	0
ENSG00000230451	0	0	0	0	0	0
ENSG00000233621	83	86	77	168	163	191
ENSG00000163874	982	951	1089	3152	3769	3534
ENSG00000163875	1425	1383	1464	1243	1373	1502
ENSG00000263675	13	10	6	6	15	7
ENSG00000163877	1025	1041	1132	1141	1192	1258
ENSG00000232273	1	1	3	8	12	16
ENSG00000237749	1	1	0	3	1	3
ENSG00000163879	16	3	6	13	32	26
ENSG00000134697	3983	3930	4175	3189	3736	3462
ENSG00000169218	0	0	0	0	0	0
ENSG00000116922	833	911	932	665	723	758
ENSG00000134690	3407	3315	3485	2804	3187	3503
ENSG00000183317	24	12	20	9	16	13
ENSG00000200421	0	0	0	0	0	0
ENSG00000214141	0	0	0	0	0	0
ENSG00000227416	0	0	0	0	0	0
ENSG00000185090	469	472	530	356	416	438
ENSG00000233728	0	0	0	0	0	0
ENSG00000196449	743	667	751	569	624	688
ENSG00000197982	1408	1268	1361	1014	1178	1549
ENSG00000188786	2027	1969	2253	2162	2327	2014
ENSG00000235673	4	1	1	1	1	2
ENSG00000204084	449	453	527	541	547	519
ENSG00000230955	0	0	0	0	0	0
ENSG00000252448	0	2	3	1	0	3
ENSG00000222282	0	0	2	1	0	0
ENSG00000277168	0	0	0	0	0	1
ENSG00000183431	5656	5560	6143	4762	5658	5498
ENSG00000212541	5	13	20	14	9	10
ENSG00000183386	694	618	735	596	656	712
ENSG00000183520	2286	2214	2341	1896	2235	2338
ENSG00000185668	24	19	20	19	16	21
ENSG00000224592	8	13	10	14	12	17
ENSG00000223589	0	1	0	0	0	0
ENSG00000265596	2	0	0	0	0	0
ENSG00000237290	0	0	0	0	0	0
ENSG00000275350	0	0	0	0	0	0
ENSG00000200796	0	0	0	0	0	0
ENSG00000238063	0	0	0	0	0	0
ENSG00000215895	3	1	1	2	1	4
ENSG00000116954	1015	973	1121	1199	1376	1375
ENSG00000273637	2	0	0	0	0	0
ENSG00000228436	15	16	20	19	17	18
ENSG00000214114	1441	1492	1505	1308	1409	1435
ENSG00000274944	12	5	18	20	17	25
ENSG00000131233	3	1	2	5	6	6
ENSG00000158315	352	366	372	750	859	888
ENSG00000199963	0	0	0	0	1	0
ENSG00000207466	0	0	0	0	0	0
ENSG00000235549	1	0	1	0	0	0
ENSG00000174574	3318	3419	3760	3856	4055	4096
ENSG00000168653	4700	4435	4860	3836	4559	5606
ENSG00000127603	16576	15224	17760	15479	17257	10192
ENSG00000206654	1	0	9	0	0	4
ENSG00000222378	3	2	4	0	5	2
ENSG00000270040	4	0	1	2	3	3
ENSG00000226438	1	1	2	4	1	2
ENSG00000217897	1	0	5	0	1	0
ENSG00000183682	9	12	6	6	7	8
ENSG00000237624	26	34	39	36	54	39
ENSG00000182109	41	40	47	33	35	45
ENSG00000243970	12	7	15	13	10	8
ENSG00000090621	7574	7635	8035	5659	6420	6722
ENSG00000228060	37	36	35	30	32	31
ENSG00000201457	22	17	18	10	11	12
ENSG00000163909	36	31	41	46	48	42
ENSG00000225903	0	0	0	0	0	0
ENSG00000116981	6	1	5	0	4	3
ENSG00000116983	87	101	99	133	134	120
ENSG00000084072	2373	2357	2602	2120	2437	2492
ENSG00000225333	0	0	0	0	0	0
ENSG00000252413	0	0	0	0	0	0
ENSG00000116985	170	137	176	165	131	171
ENSG00000198754	32	44	34	35	29	35
ENSG00000261798	3	3	9	3	1	5
ENSG00000229213	0	0	0	0	0	0
ENSG00000043514	1274	1233	1416	1015	1169	1215
ENSG00000202222	2	3	3	2	0	1
ENSG00000116990	227	167	233	206	243	246
ENSG00000236546	1	1	0	0	2	0
ENSG00000207356	1	0	0	1	0	0
ENSG00000168389	712	675	760	841	866	914
ENSG00000228477	39	33	33	31	33	24
ENSG00000131236	14716	14878	15970	14928	16910	16126
ENSG00000131238	6136	6349	6627	5302	5961	5868
ENSG00000226745	0	0	0	0	0	0
ENSG00000117000	1873	1744	2002	2010	2202	1584
ENSG00000207508	1	5	2	3	5	3
ENSG00000188800	7	0	3	5	5	2
ENSG00000259943	196	197	249	192	232	214
ENSG00000084073	4017	3980	4188	3643	3681	3746
ENSG00000231296	2	8	6	1	5	2
ENSG00000049089	30	17	16	88	105	120
ENSG00000227311	0	0	1	0	0	0
ENSG00000084070	1301	1318	1431	1083	1269	1227
ENSG00000213172	0	0	0	0	0	0
ENSG00000187801	133	148	183	107	137	91
ENSG00000260920	106	103	95	96	92	99
ENSG00000279667	5	8	7	3	4	4
ENSG00000187815	247	201	241	219	219	187
ENSG00000238287	30	32	30	21	34	35
ENSG00000164002	464	529	521	558	608	615
ENSG00000227278	1	3	1	3	0	3
ENSG00000238186	20	24	25	15	26	33
ENSG00000117010	224	211	191	237	252	232
ENSG00000236505	0	0	0	0	0	0
ENSG00000233910	0	0	0	0	0	0
ENSG00000117016	127	106	116	137	186	168
ENSG00000237899	4	15	9	13	9	13
ENSG00000272145	50	66	82	55	48	68
ENSG00000066136	1372	1409	1411	1166	1278	1381
ENSG00000198974	0	0	0	1	0	0
ENSG00000207962	0	0	1	0	0	0
ENSG00000117013	24	18	19	7	13	7
ENSG00000264582	0	0	0	0	0	0
ENSG00000179862	1912	1762	1918	1842	1765	3129
ENSG00000229528	1	0	2	0	0	2
ENSG00000228940	0	0	0	0	0	0
ENSG00000233118	0	0	0	2	0	0
ENSG00000171793	3933	3897	4203	3513	4166	3983
ENSG00000281207	181	171	180	185	170	129
ENSG00000171790	77	66	58	59	62	50
ENSG00000010803	925	910	1050	835	905	835
ENSG00000215893	2	5	0	3	2	1
ENSG00000235358	1	1	3	5	0	1
ENSG00000213987	0	0	0	0	0	0
ENSG00000204060	40	52	41	36	44	60
ENSG00000229901	4	4	11	4	2	5
ENSG00000252563	0	0	0	0	0	0
ENSG00000127129	29	34	22	47	67	57
ENSG00000127124	114	97	138	120	133	109
ENSG00000230881	1	0	0	0	0	0
ENSG00000230638	12	11	20	13	21	19
ENSG00000227538	0	0	0	0	0	0
ENSG00000228776	0	0	0	0	0	0
ENSG00000044012	0	0	0	0	0	0
ENSG00000197273	0	0	1	0	1	0
ENSG00000198815	2251	2269	2559	2337	2479	2189
ENSG00000227527	7	5	2	2	3	5
ENSG00000177181	4	4	5	13	5	5
ENSG00000235002	0	0	0	0	0	0
ENSG00000066185	29	21	20	23	26	28
ENSG00000127125	1453	1462	1599	1281	1484	1557
ENSG00000186409	55	65	53	55	59	68
ENSG00000230116	0	0	1	0	0	0
ENSG00000236876	0	0	2	1	0	0
ENSG00000200254	2	0	0	0	0	0
ENSG00000236180	2	0	0	1	0	0
ENSG00000171960	2018	2035	2178	1646	1765	2223
ENSG00000234917	10	12	5	7	7	3
ENSG00000065978	47261	48128	49626	34240	37634	47952
ENSG00000164007	0	0	1	0	2	4
ENSG00000117385	1109	1078	1202	1143	1378	1357
ENSG00000164008	53	72	81	60	48	44
ENSG00000283580	6	15	10	6	7	9
ENSG00000228452	36	36	44	31	40	21
ENSG00000274386	17	20	27	20	20	16
ENSG00000177868	331	312	343	342	396	467
ENSG00000164010	271	311	335	301	334	311
ENSG00000228192	188	176	168	119	123	103
ENSG00000164011	427	455	447	359	392	440
ENSG00000233708	0	0	0	1	1	0
ENSG00000237090	0	0	0	0	0	0
ENSG00000225099	0	0	2	1	0	0
ENSG00000117394	5850	5799	6508	6233	7174	7152
ENSG00000227533	25	30	26	14	16	14
ENSG00000207256	0	0	0	1	0	1
ENSG00000283136	0	0	0	1	0	0
ENSG00000277513	0	0	0	0	0	0
ENSG00000186973	2	0	5	3	3	3
ENSG00000117395	3247	3234	3390	1977	2308	2895
ENSG00000243710	46	54	46	27	25	13
ENSG00000199240	0	0	0	0	0	0
ENSG00000179178	105	105	131	184	179	216
ENSG00000253313	323	275	332	321	348	399
ENSG00000066056	0	2	3	4	2	0
ENSG00000117400	28	22	23	17	28	20
ENSG00000234694	118	119	115	69	97	141
ENSG00000117399	8795	8620	9249	5711	6777	7533
ENSG00000066322	3537	3493	3884	3122	3827	4107
ENSG00000159479	1597	1530	1685	1434	1632	1781
ENSG00000229431	53	83	83	61	85	84
ENSG00000198198	2055	1818	2184	2174	2522	1566
ENSG00000229372	2	8	4	7	8	12
ENSG00000274975	0	0	0	0	0	0
ENSG00000178922	670	711	765	809	869	1005
ENSG00000229348	10	12	12	19	16	29
ENSG00000142949	12752	12142	14128	12891	14437	11290
ENSG00000066135	2567	2600	2833	2780	3033	2845
ENSG00000236200	127	145	158	169	149	172
ENSG00000126091	402	411	457	319	400	413
ENSG00000229444	0	1	1	3	1	2
ENSG00000283414	1	1	0	0	0	0
ENSG00000233674	5	3	1	4	6	5
ENSG00000283477	1	0	0	2	0	0
ENSG00000224751	1	2	0	5	1	0
ENSG00000117407	2365	2028	2428	2009	2052	2558
ENSG00000237950	52	44	51	33	38	27
ENSG00000117408	2095	2113	2447	2099	2428	2253
ENSG00000132768	1120	1119	1215	850	952	989
ENSG00000117410	2909	2884	2999	3199	3624	4155
ENSG00000117411	1811	1711	1902	1417	1821	1852
ENSG00000159214	715	655	721	1487	1693	1950
ENSG00000196517	859	871	977	975	1106	1008
ENSG00000230615	64	60	78	164	143	142
ENSG00000227163	1	3	4	0	4	3
ENSG00000271647	1	1	0	1	2	0
ENSG00000239560	0	0	0	0	0	0
ENSG00000171872	6	11	10	17	12	28
ENSG00000233514	2	2	1	1	1	0
ENSG00000283039	0	0	2	0	0	0
ENSG00000226804	0	0	0	0	0	0
ENSG00000200171	0	0	0	0	0	0
ENSG00000238037	0	2	0	0	1	0
ENSG00000227994	0	0	0	0	0	0
ENSG00000271329	2	2	4	2	2	1
ENSG00000178028	1258	1340	1342	1289	1501	1606
ENSG00000117419	1658	1557	1689	1283	1425	1524
ENSG00000233602	11	15	17	5	4	2
ENSG00000199385	0	0	0	0	0	0
ENSG00000187147	2369	2335	2551	1948	2179	2612
ENSG00000263381	2	1	0	0	0	0
ENSG00000126106	200	185	207	214	285	272
ENSG00000198520	14	18	16	15	11	19
ENSG00000199377	0	5	2	1	0	2
ENSG00000200169	3	4	10	3	4	1
ENSG00000142945	5847	6112	6146	5331	6106	6220
ENSG00000225721	51	32	43	40	35	44
ENSG00000142937	24181	23307	25505	18391	21134	25555
ENSG00000264294	0	0	0	0	0	0
ENSG00000200913	26	24	27	13	15	21
ENSG00000202031	8	3	6	4	6	10
ENSG00000281859	0	0	0	0	0	0
ENSG00000207421	0	0	0	0	0	0
ENSG00000234093	4	4	2	2	3	4
ENSG00000142959	93	87	79	44	107	87
ENSG00000173846	817	784	878	960	996	1129
ENSG00000188396	17	29	30	33	36	24
ENSG00000222009	189	200	249	320	319	357
ENSG00000117425	12	21	29	24	26	22
ENSG00000202444	0	0	0	0	0	0
ENSG00000226499	7	3	10	3	2	2
ENSG00000070785	1097	1143	1291	802	1041	956
ENSG00000253039	0	0	0	0	1	0
ENSG00000229815	1	0	0	0	0	0
ENSG00000232369	2	3	3	1	1	1
ENSG00000268949	13	8	1	2	6	4
ENSG00000126107	1387	1279	1475	1358	1512	1595
ENSG00000126088	2718	2718	2822	2130	2586	2960
ENSG00000162415	27	13	26	20	31	22
ENSG00000234315	0	0	1	0	1	0
ENSG00000281912	15	9	12	15	8	6
ENSG00000186603	341	389	454	222	275	284
ENSG00000132781	693	703	755	626	684	721
ENSG00000132773	666	580	620	469	569	622
ENSG00000070759	215	227	226	355	385	350
ENSG00000236872	1	1	1	3	5	5
ENSG00000280670	68	71	57	66	68	66
ENSG00000132763	728	742	756	457	558	572
ENSG00000117450	15816	16341	16351	12910	14514	15873
ENSG00000234379	0	0	1	0	0	0
ENSG00000117448	1892	1925	1989	1559	1865	2144
ENSG00000281133	0	0	1	0	0	2
ENSG00000280836	1	1	4	7	3	2
ENSG00000132780	8873	8779	9227	8539	9731	10239
ENSG00000281112	0	1	0	0	2	1
ENSG00000281825	0	0	0	1	0	0
ENSG00000159588	53	92	56	74	76	86
ENSG00000159592	4164	4180	4503	4167	4743	4380
ENSG00000225447	12	23	6	3	21	31
ENSG00000234329	11	21	31	19	32	14
ENSG00000159596	1729	1663	1785	1544	1682	1798
ENSG00000197429	688	804	770	707	723	687
ENSG00000230896	61	64	62	58	57	78
ENSG00000236111	0	0	0	0	0	0
ENSG00000086015	2755	2585	2875	2643	3025	2614
ENSG00000232467	1	1	0	0	0	1
ENSG00000117461	939	1014	1010	884	874	755
ENSG00000278139	0	0	0	0	0	0
ENSG00000226957	1	3	2	3	3	2
ENSG00000233114	0	0	0	0	0	0
ENSG00000227857	4	8	4	5	1	5
ENSG00000117472	3289	3261	3554	2412	2743	3019
ENSG00000250719	0	0	0	0	0	0
ENSG00000085998	2926	2898	3064	2710	3124	3223
ENSG00000171357	40	41	43	31	41	30
ENSG00000085999	1496	1504	1613	1677	1989	1706
ENSG00000132128	2472	2355	2741	2269	2618	2489
ENSG00000173660	9194	8852	9047	7723	8559	10820
ENSG00000117481	1305	1248	1390	1129	1284	1330
ENSG00000225779	2	3	4	1	3	3
ENSG00000117480	321	362	333	311	373	417
ENSG00000232022	64	48	47	47	66	69
ENSG00000224863	5	2	3	5	9	5
ENSG00000197587	6	14	11	12	18	16
ENSG00000282881	0	0	1	0	0	0
ENSG00000269956	42	34	28	42	41	41
ENSG00000162456	0	0	0	1	0	0
ENSG00000079277	1587	1647	1693	1704	2040	1791
ENSG00000142961	1176	1156	1197	1585	1812	1727
ENSG00000123472	1773	1807	1889	1759	1837	1970
ENSG00000233647	1	3	1	0	1	0
ENSG00000186118	0	6	6	2	6	4
ENSG00000228237	5	14	8	11	16	8
ENSG00000159658	4397	4389	4885	4741	5211	4460
ENSG00000236476	0	0	0	0	0	0
ENSG00000142973	5	4	3	1	3	1
ENSG00000154198	0	1	0	0	0	0
ENSG00000238145	0	0	0	0	0	0
ENSG00000187048	0	0	0	0	0	0
ENSG00000259832	0	0	0	0	0	0
ENSG00000261196	0	0	0	0	0	0
ENSG00000261593	0	0	0	0	1	0
ENSG00000261290	0	0	0	0	0	0
ENSG00000186377	2	2	5	0	6	6
ENSG00000186160	5	2	2	6	2	4
ENSG00000225154	0	0	0	0	0	0
ENSG00000225506	34	47	40	42	40	46
ENSG00000162365	3	0	1	0	1	0
ENSG00000225514	0	1	0	1	0	0
ENSG00000224805	19	29	21	14	28	34
ENSG00000162366	3	1	2	166	160	231
ENSG00000162367	1	1	0	1	0	1
ENSG00000226252	1	0	0	0	0	3
ENSG00000123473	2567	2584	2775	2992	3326	2794
ENSG00000162368	5195	5313	5615	5601	5760	5755
ENSG00000225762	13	7	7	8	3	5
ENSG00000186790	11	8	10	4	8	5
ENSG00000237424	101	120	81	125	100	111
ENSG00000186564	44	47	34	39	46	43
ENSG00000271355	0	0	0	0	0	0
ENSG00000229554	0	0	0	0	0	0
ENSG00000227883	0	0	0	0	0	0
ENSG00000227947	0	0	0	0	0	0
ENSG00000269113	0	0	0	0	0	1
ENSG00000223814	0	0	0	0	0	0
ENSG00000225028	0	0	0	0	0	0
ENSG00000226133	0	0	0	0	0	0
ENSG00000231413	0	0	0	0	0	0
ENSG00000237180	0	0	0	0	0	0
ENSG00000242267	1	0	0	1	0	0
ENSG00000279096	0	0	0	0	0	0
ENSG00000223720	0	0	0	0	0	0
ENSG00000117834	1	2	0	1	0	1
ENSG00000272491	0	0	0	0	0	0
ENSG00000279214	0	0	0	0	0	0
ENSG00000132122	40	48	50	36	40	47
ENSG00000224986	0	0	0	0	0	0
ENSG00000206700	0	0	0	0	0	0
ENSG00000235105	0	1	0	2	0	2
ENSG00000223175	0	0	0	0	0	0
ENSG00000232514	0	0	0	0	0	0
ENSG00000186094	0	0	0	0	0	0
ENSG00000162373	0	0	0	0	0	0
ENSG00000229846	0	0	0	0	0	0
ENSG00000230114	0	0	0	0	0	0
ENSG00000225623	0	0	0	0	0	0
ENSG00000237478	0	0	0	0	0	0
ENSG00000215887	0	0	0	0	0	0
ENSG00000279324	1	0	0	0	0	0
ENSG00000233595	0	0	0	0	0	0
ENSG00000162374	0	0	0	0	0	1
ENSG00000230828	0	0	0	0	0	0
ENSG00000237337	0	0	0	0	0	0
ENSG00000233407	0	0	0	0	0	0
ENSG00000234080	1	0	0	0	0	0
ENSG00000229316	0	0	0	0	0	0
ENSG00000225671	0	1	0	0	0	0
ENSG00000142700	0	0	0	0	0	0
ENSG00000185104	1877	1823	1989	1616	1747	1776
ENSG00000225767	1	2	6	3	2	0
ENSG00000207194	0	0	0	0	0	0
ENSG00000230585	2	2	6	8	9	5
ENSG00000237130	0	0	1	1	0	0
ENSG00000123080	1055	1018	1102	857	1067	1121
ENSG00000265538	0	0	0	0	0	0
ENSG00000275816	0	0	0	0	0	0
ENSG00000204006	0	0	0	0	0	0
ENSG00000200262	0	0	0	0	0	0
ENSG00000213478	1	0	0	0	0	0
ENSG00000203356	1	1	0	0	1	0
ENSG00000123091	2083	2264	2317	2289	2453	2322
ENSG00000233406	4	3	6	3	4	1
ENSG00000236434	0	1	3	2	0	4
ENSG00000085831	36	31	31	31	68	59
ENSG00000261664	0	0	0	0	1	1
ENSG00000085832	1767	1740	1962	1696	1834	1699
ENSG00000232027	4	3	6	2	1	1
ENSG00000206595	0	0	1	0	0	0
ENSG00000238140	0	0	1	3	0	1
ENSG00000227070	5	9	3	7	14	8
ENSG00000252032	0	0	0	0	0	0
ENSG00000227742	0	1	1	2	3	2
ENSG00000117859	3270	3212	3500	3113	3348	3147
ENSG00000236973	0	0	0	0	0	0
ENSG00000232846	0	0	0	2	0	0
ENSG00000212624	0	0	0	0	0	0
ENSG00000078618	8842	8808	9410	8455	9563	7823
ENSG00000266993	48	47	45	62	40	36
ENSG00000272175	1	0	2	6	3	0
ENSG00000230604	2	0	3	4	1	4
ENSG00000169213	770	812	912	1086	1175	841
ENSG00000200839	1	1	0	0	0	0
ENSG00000229032	0	0	0	2	0	0
ENSG00000264613	0	0	0	0	0	0
ENSG00000117862	2952	3008	3384	2633	3045	3217
ENSG00000198841	450	500	528	376	439	494
ENSG00000223390	2	0	0	1	2	1
ENSG00000228369	4	0	6	4	3	0
ENSG00000134717	2413	2501	2527	2111	2252	2387
ENSG00000157077	1460	1534	1613	1773	1922	1413
ENSG00000241745	1	1	0	0	0	0
ENSG00000228407	3	3	8	7	4	4
ENSG00000223429	1	1	0	9	1	1
ENSG00000224255	1	3	3	2	3	4
ENSG00000236004	0	0	0	1	2	0
ENSG00000237663	1	0	0	1	0	0
ENSG00000213735	0	0	0	0	0	0
ENSG00000154222	1767	1782	1939	1853	2135	2100
ENSG00000272100	6	7	12	12	16	8
ENSG00000224680	6	3	8	13	9	9
ENSG00000085840	1292	1113	1356	1265	1522	1286
ENSG00000134748	2344	2291	2370	2291	2615	2557
ENSG00000134744	2163	2223	2231	2079	2358	1773
ENSG00000272371	2	1	0	1	1	0
ENSG00000236290	0	0	0	0	1	0
ENSG00000116157	40	28	30	17	29	37
ENSG00000182183	111	123	113	77	81	94
ENSG00000162377	2828	2686	2912	1860	2174	1900
ENSG00000233664	0	0	0	0	0	0
ENSG00000239640	0	0	0	0	0	0
ENSG00000162378	1294	1420	1442	1566	1572	1315
ENSG00000252018	0	2	1	0	0	0
ENSG00000228929	2	6	1	5	2	4
ENSG00000206627	0	0	1	1	1	0
ENSG00000203995	618	596	660	604	649	489
ENSG00000242391	6	9	9	8	8	8
ENSG00000121310	1881	1864	1954	1982	2039	2219
ENSG00000230953	29	38	38	25	54	19
ENSG00000231866	0	0	0	0	0	0
ENSG00000116171	2665	2876	2748	2505	2615	2748
ENSG00000264834	0	0	1	0	0	2
ENSG00000266188	0	0	0	0	0	0
ENSG00000265815	0	2	1	0	0	0
ENSG00000237279	0	0	0	0	0	0
ENSG00000236360	0	1	0	0	2	0
ENSG00000226147	0	1	3	1	0	2
ENSG00000279054	0	0	0	0	0	0
ENSG00000174348	0	0	0	0	0	0
ENSG00000232993	0	0	0	0	0	0
ENSG00000227644	0	0	0	0	0	0
ENSG00000162383	4	0	0	0	0	0
ENSG00000235563	0	0	0	0	0	0
ENSG00000277397	0	0	0	0	0	0
ENSG00000157184	688	759	850	829	836	849
ENSG00000236723	7	12	11	7	8	8
ENSG00000162384	1118	1059	1048	864	1041	1182
ENSG00000259818	14	8	2	2	6	0
ENSG00000162385	3420	3472	3569	2918	3394	3941
ENSG00000226754	11	12	14	11	11	10
ENSG00000157193	1410	1354	1479	1015	1194	992
ENSG00000234578	0	0	4	0	0	0
ENSG00000228838	0	0	3	1	1	1
ENSG00000225030	0	1	6	1	2	1
ENSG00000232762	11	6	12	12	12	8
ENSG00000225675	2	3	3	0	1	5
ENSG00000226938	0	0	0	0	0	0
ENSG00000230138	0	0	0	0	0	0
ENSG00000236253	0	0	0	0	0	0
ENSG00000143006	0	0	0	0	0	0
ENSG00000174332	0	1	2	0	0	0
ENSG00000239007	0	0	0	0	0	0
ENSG00000058804	3668	3666	4028	2960	3046	2675
ENSG00000201003	0	0	5	0	2	5
ENSG00000229687	0	0	0	0	0	0
ENSG00000058799	734	690	808	687	806	854
ENSG00000211452	3	10	16	9	15	9
ENSG00000081870	1174	1258	1328	1274	1323	1615
ENSG00000116212	2066	2065	2196	1929	2263	2380
ENSG00000219102	11	7	4	9	8	7
ENSG00000203985	0	0	0	2	0	0
ENSG00000116209	4292	4641	4771	4646	5288	6037
ENSG00000280378	9	12	18	9	11	8
ENSG00000116205	765	721	773	725	814	729
ENSG00000225183	2	2	1	0	1	1
ENSG00000279049	0	0	0	0	0	0
ENSG00000256407	1	0	2	2	1	0
ENSG00000157211	1	0	0	0	0	0
ENSG00000280425	0	1	1	2	1	2
ENSG00000215883	331	320	350	272	300	249
ENSG00000116221	3633	3566	3891	3243	3745	3984
ENSG00000157216	1087	1037	1113	1192	1281	1318
ENSG00000198711	18	40	27	17	29	27
ENSG00000225632	0	0	0	1	4	2
ENSG00000232245	0	0	0	0	0	0
ENSG00000235741	12	11	11	11	11	6
ENSG00000237173	0	0	0	0	0	2
ENSG00000227453	0	0	0	0	0	0
ENSG00000162390	366	383	423	407	482	437
ENSG00000162391	32	20	24	23	32	31
ENSG00000230728	0	0	2	0	1	0
ENSG00000184313	3	6	2	3	1	1
ENSG00000271723	0	0	0	0	0	0
ENSG00000243725	480	504	432	383	394	374
ENSG00000162396	257	247	314	249	316	317
ENSG00000006555	628	559	709	513	635	561
ENSG00000237453	8	1	5	6	2	1
ENSG00000162398	6	3	2	2	6	2
ENSG00000116133	13805	13337	15138	13089	15235	13903
ENSG00000242396	26	20	22	25	25	16
ENSG00000233203	11	16	10	14	8	8
ENSG00000143001	11	12	9	14	16	22
ENSG00000233271	0	0	0	0	0	0
ENSG00000162399	0	3	4	0	2	3
ENSG00000169174	7200	7059	8092	7331	8717	8753
ENSG00000162402	4606	4520	4972	4244	4485	3237
ENSG00000231090	0	0	3	0	0	0
ENSG00000231095	0	0	0	0	0	0
ENSG00000265822	0	0	0	0	0	0
ENSG00000231900	0	0	0	0	0	0
ENSG00000232198	0	0	0	0	0	0
ENSG00000199831	0	0	0	0	0	0
ENSG00000252162	0	0	0	0	0	0
ENSG00000272051	0	0	0	0	0	0
ENSG00000234810	0	0	0	0	0	0
ENSG00000230250	0	0	0	0	0	0
ENSG00000227104	0	0	0	0	0	0
ENSG00000233079	0	0	0	0	0	0
ENSG00000235612	0	0	0	0	0	0
ENSG00000229871	0	0	0	0	0	0
ENSG00000260971	0	0	0	0	0	0
ENSG00000223956	0	0	0	0	0	0
ENSG00000162407	24	23	25	38	52	60
ENSG00000236776	0	0	0	0	0	0
ENSG00000224980	0	0	0	0	0	0
ENSG00000225475	0	0	0	0	0	0
ENSG00000162409	4	10	11	14	15	10
ENSG00000187889	0	0	0	0	1	0
ENSG00000229913	0	0	0	0	0	0
ENSG00000157131	0	0	0	0	0	0
ENSG00000021852	0	0	0	0	0	0
ENSG00000236341	0	0	0	0	0	0
ENSG00000173406	0	0	1	0	1	0
ENSG00000227935	0	0	0	0	0	0
ENSG00000236888	1	0	0	0	0	0
ENSG00000226759	0	0	0	0	0	0
ENSG00000229887	0	0	0	0	0	0
ENSG00000223416	1	0	0	0	0	1
ENSG00000235038	0	0	0	0	0	0
ENSG00000230546	0	0	0	0	0	0
ENSG00000233216	0	0	0	1	0	0
ENSG00000162600	713	758	788	630	716	615
ENSG00000270209	0	0	1	0	0	0
ENSG00000264128	0	0	0	0	0	0
ENSG00000184292	12002	11692	12369	14154	15797	18455
ENSG00000185839	4	7	12	7	12	4
ENSG00000162601	2631	2551	2707	2660	2658	1956
ENSG00000283445	55	64	55	94	87	55
ENSG00000177606	2781	2760	2881	3369	3882	4179
ENSG00000234807	9	4	5	7	13	8
ENSG00000272226	3	3	2	3	2	2
ENSG00000231740	1	0	0	0	0	0
ENSG00000232453	9	9	10	10	16	10
ENSG00000237352	26	15	23	20	42	38
ENSG00000228121	2	0	0	2	1	0
ENSG00000241042	0	0	0	1	0	0
ENSG00000235215	1	1	0	4	4	2
ENSG00000224609	0	2	0	3	3	3
ENSG00000270457	0	0	0	5	0	0
ENSG00000172456	207	193	181	149	188	181
ENSG00000266150	0	0	0	0	0	0
ENSG00000226883	2	0	1	3	3	1
ENSG00000134709	1912	1945	2046	1912	1988	1649
ENSG00000134716	588	609	637	673	752	762
ENSG00000265535	0	0	0	0	0	0
ENSG00000162598	1	0	0	0	0	0
ENSG00000229332	0	0	0	0	0	0
ENSG00000238242	0	0	0	0	0	0
ENSG00000226476	1	0	2	3	0	0
ENSG00000231252	0	0	0	0	0	0
ENSG00000162599	1447	1408	1573	1214	1261	1252
ENSG00000237928	0	0	0	0	0	0
ENSG00000270742	1	6	6	1	3	1
ENSG00000237853	3	3	7	2	2	2
ENSG00000223920	0	0	0	0	0	0
ENSG00000162604	778	892	902	875	895	1042
ENSG00000271200	5	2	3	1	1	5
ENSG00000132849	3263	3301	3690	3556	4032	3275
ENSG00000200575	1	0	0	1	0	1
ENSG00000212360	3	4	2	2	1	2
ENSG00000236646	0	0	0	0	1	1
ENSG00000242860	1	0	1	0	1	1
ENSG00000263908	0	0	0	0	0	0
ENSG00000283690	0	0	0	0	0	0
ENSG00000234204	0	0	0	0	0	0
ENSG00000234088	0	0	0	0	0	0
ENSG00000240563	552	496	537	543	587	540
ENSG00000237227	0	0	3	4	1	3
ENSG00000200174	0	0	0	0	0	0
ENSG00000132854	113	88	127	187	182	139
ENSG00000201153	0	0	0	0	0	0
ENSG00000162607	4905	4908	4866	4882	5348	5353
ENSG00000116641	1737	1866	2056	1815	1900	1441
ENSG00000270549	0	0	0	0	0	1
ENSG00000132855	3	3	3	2	5	4
ENSG00000278967	2	3	2	3	0	0
ENSG00000213703	0	0	1	1	3	0
ENSG00000235545	4	4	4	7	6	8
ENSG00000125703	676	597	666	578	625	592
ENSG00000234318	0	0	0	0	0	0
ENSG00000237163	0	0	0	0	0	0
ENSG00000229537	0	0	0	0	0	0
ENSG00000227485	0	0	0	0	0	0
ENSG00000229225	0	0	0	0	0	0
ENSG00000203605	0	0	0	0	0	0
ENSG00000224209	2	0	4	0	1	3
ENSG00000252259	0	0	0	0	0	0
ENSG00000228734	0	0	0	0	0	0
ENSG00000223683	0	0	0	0	0	0
ENSG00000230798	1	1	0	2	0	3
ENSG00000187140	0	0	0	0	0	0
ENSG00000275836	0	0	0	0	0	0
ENSG00000252784	0	0	0	0	0	0
ENSG00000236674	0	0	0	0	0	0
ENSG00000088035	896	891	892	950	944	1035
ENSG00000142856	2021	1960	2003	1959	1983	1951
ENSG00000203965	459	483	453	518	555	539
ENSG00000264271	0	0	0	0	0	0
ENSG00000251720	1	0	0	1	1	3
ENSG00000116652	29	44	49	56	57	34
ENSG00000276884	0	0	0	0	0	0
ENSG00000278287	0	0	0	0	0	0
ENSG00000277565	0	0	0	0	0	0
ENSG00000275823	0	0	0	0	0	0
ENSG00000277689	0	0	0	0	0	0
ENSG00000274199	0	0	0	0	0	0
ENSG00000079739	2764	2681	3004	2668	3273	3278
ENSG00000244256	11	10	10	11	4	5
ENSG00000185483	136	170	150	111	114	127
ENSG00000177452	2	0	0	0	1	0
ENSG00000228056	0	0	0	0	0	0
ENSG00000207190	0	0	0	0	0	0
ENSG00000200508	0	0	0	0	0	0
ENSG00000223949	1	1	1	2	1	4
ENSG00000177414	0	0	0	0	0	0
ENSG00000238653	0	0	0	0	0	0
ENSG00000158966	272	241	257	256	293	262
ENSG00000264470	0	0	0	0	0	0
ENSG00000162437	993	927	1055	979	987	908
ENSG00000162434	4295	4345	4683	5104	5575	4682
ENSG00000234784	0	0	0	0	2	0
ENSG00000233877	0	1	1	0	1	0
ENSG00000226891	3	10	4	4	9	9
ENSG00000185031	0	0	0	0	2	0
ENSG00000272506	1	0	1	0	0	0
ENSG00000212257	0	0	0	2	1	0
ENSG00000265996	0	3	3	1	1	0
ENSG00000199135	0	1	0	0	1	0
ENSG00000231485	0	0	0	3	0	0
ENSG00000235804	0	0	0	0	0	0
ENSG00000234496	0	0	0	0	0	0
ENSG00000162433	3209	3564	3704	3470	3846	3509
ENSG00000231622	0	3	1	0	1	0
ENSG00000116675	58	64	50	72	74	61
ENSG00000229294	0	0	0	0	0	0
ENSG00000234144	0	1	0	0	0	0
ENSG00000222624	0	0	0	0	0	0
ENSG00000213625	1497	1675	1604	1774	1895	1744
ENSG00000116678	129	145	195	153	127	123
ENSG00000237852	0	2	2	0	3	1
ENSG00000224570	0	0	0	0	0	1
ENSG00000239319	0	0	0	0	0	0
ENSG00000184588	0	0	0	0	0	0
ENSG00000227466	0	0	0	0	0	0
ENSG00000223152	0	0	0	0	0	0
ENSG00000118473	3	2	0	6	1	1
ENSG00000264720	0	0	0	0	0	0
ENSG00000248458	0	0	1	0	0	0
ENSG00000152760	0	0	0	0	0	0
ENSG00000172410	0	1	0	0	0	0
ENSG00000152763	153	163	162	105	145	124
ENSG00000231080	0	0	0	0	0	0
ENSG00000198160	2706	2913	2987	3147	3143	2734
ENSG00000116704	1186	1164	1279	1128	1151	928
ENSG00000203963	1	1	1	4	4	2
ENSG00000252433	0	0	0	0	0	0
ENSG00000275678	1	0	0	1	1	2
ENSG00000162594	2	3	2	1	3	2
ENSG00000253074	0	0	0	0	0	0
ENSG00000252116	0	0	0	0	0	0
ENSG00000228523	0	0	0	0	0	0
ENSG00000081985	815	859	946	626	714	570
ENSG00000142864	21579	22080	23737	17648	19690	19492
ENSG00000223263	11	2	2	7	2	4
ENSG00000235200	0	1	1	0	1	1
ENSG00000207504	0	0	0	0	0	0
ENSG00000238139	0	0	0	0	0	0
ENSG00000242482	0	0	0	0	0	0
ENSG00000232048	0	0	1	0	0	0
ENSG00000116717	3703	3737	3955	3058	3774	4476
ENSG00000172380	4856	5102	5389	5739	5846	4973
ENSG00000238778	0	0	0	0	0	0
ENSG00000232284	36	42	51	43	37	19
ENSG00000235055	0	0	0	0	0	0
ENSG00000162595	5	7	4	8	12	13
ENSG00000228431	0	1	0	0	2	2
ENSG00000116729	4099	4207	4504	3843	4141	4140
ENSG00000234383	24	18	25	31	14	14
ENSG00000221203	0	1	2	2	0	0
ENSG00000229133	0	0	0	0	0	0
ENSG00000225242	0	0	0	0	0	0
ENSG00000237622	1	2	0	0	3	0
ENSG00000229440	0	0	0	0	0	0
ENSG00000116745	0	2	3	1	1	1
ENSG00000024526	4176	4207	4285	3567	3678	3533
ENSG00000233589	59	49	81	66	53	42
ENSG00000234264	20	12	26	21	19	18
[truncated: 56,294 more rows]

## Sheet: Supplementary Data 7
Gene	VK2-Live-MM-3	VK2-Live-MM-2	VK2-Live-MM-1	VK2-NT-3	VK2-NT-2	VK2-NT-1
[truncated: 58,143 more rows]

[truncated: 7 more sheets: Supplementary Data 8, Supplementary Data 9, Supplementary Table 10, Supplementary Table 11, Supplementary Table 12, Supplementary Table 13, Supplementary Table 14]
